# Supplementary material
Source: publisher figshare collection journal article supplement (https://tandf.figshare.com/ndownloader/files/13485527)
Supplement: Supplementary file 1 [file 13485527]

Supplementary Table 1: A list of genes that were identified to exhibit complex biphasic responses using K-mean clustering for high dose rate exposures.

| symbol | log2FC.D1 | pval.D1 | padj.D1 | log2FC.D2 | pval.D2 | padj.D2 | log2FC.D3 | pval.D3 | padj.D3 | log2FC.D4 | pval.D4 | padj.D4 | log2FC.D5 | pval.D5 | padj.D5 | log2FC.D6 | pval.D6 | padj.D6 |
| --- | --- | --- | --- | --- | --- | --- | --- | --- | --- | --- | --- | --- | --- | --- | --- | --- | --- | --- |
| KCNH1 | 0.09 | 0.61 | 1.00 | -0.17 | 0.35 | 1.00 | -0.07 | 0.68 | 1.00 | -0.32 | 0.06 | 1.00 | -0.88 | 0.00 | 0.00 | -1.36 | 0.00 | 0.00 |
| HIST1H3I | 0.04 | 0.80 | 1.00 | 0.08 | 0.59 | 1.00 | -0.02 | 0.86 | 1.00 | -0.23 | 0.13 | 1.00 | -0.83 | 0.00 | 0.01 | -1.51 | 0.00 | 0.00 |
| HIST1H2BF | -0.11 | 0.43 | 1.00 | 0.12 | 0.40 | 1.00 | -0.04 | 0.76 | 1.00 | -0.05 | 0.70 | 1.00 | -0.68 | 0.00 | 0.01 | -1.30 | 0.00 | 0.00 |
| INHBB | 0.00 | 0.99 | 1.00 | 0.03 | 0.85 | 1.00 | -0.01 | 0.93 | 1.00 | -0.10 | 0.49 | 1.00 | -0.59 | 0.00 | 0.06 | -1.56 | 0.00 | 0.00 |
| KIF26B | 0.03 | 0.90 | 1.00 | 0.10 | 0.66 | 1.00 | 0.08 | 0.69 | 1.00 | -0.16 | 0.50 | 1.00 | -0.90 | 0.00 | 0.06 | -1.80 | 0.00 | 0.00 |
| HIST1H4C | 0.09 | 0.47 | 1.00 | 0.11 | 0.46 | 1.00 | -0.08 | 0.47 | 1.00 | -0.09 | 0.50 | 1.00 | -0.68 | 0.00 | 0.06 | -0.87 | 0.00 | 0.00 |
| FABP5 | -0.07 | 0.64 | 1.00 | -0.04 | 0.80 | 1.00 | 0.03 | 0.86 | 1.00 | -0.19 | 0.28 | 1.00 | -0.70 | 0.00 | 0.06 | -0.97 | 0.00 | 0.00 |
| CTH | 0.05 | 0.78 | 1.00 | -0.15 | 0.38 | 1.00 | -0.06 | 0.70 | 1.00 | -0.16 | 0.42 | 1.00 | -0.71 | 0.00 | 0.06 | -0.75 | 0.00 | 0.00 |
| CXCL12 | -0.14 | 0.33 | 1.00 | -0.08 | 0.60 | 1.00 | -0.20 | 0.16 | 1.00 | -0.25 | 0.10 | 1.00 | -0.59 | 0.00 | 0.06 | -1.37 | 0.00 | 0.00 |
| HIST1H2BK | 0.08 | 0.54 | 1.00 | 0.14 | 0.31 | 1.00 | -0.03 | 0.82 | 1.00 | -0.07 | 0.62 | 1.00 | -0.60 | 0.00 | 0.07 | -1.06 | 0.00 | 0.00 |
| NRG1 | 0.20 | 0.27 | 1.00 | -0.18 | 0.25 | 1.00 | -0.16 | 0.40 | 1.00 | -0.17 | 0.42 | 1.00 | -0.64 | 0.00 | 0.08 | -1.19 | 0.00 | 0.00 |
| HIST1H4B | 0.12 | 0.36 | 1.00 | 0.13 | 0.44 | 1.00 | -0.01 | 0.95 | 1.00 | -0.01 | 0.93 | 1.00 | -0.70 | 0.00 | 0.10 | -1.05 | 0.00 | 0.00 |
| HIST2H2BF | 0.17 | 0.26 | 1.00 | 0.21 | 0.21 | 1.00 | -0.02 | 0.89 | 1.00 | -0.04 | 0.78 | 1.00 | -0.63 | 0.00 | 0.11 | -1.30 | 0.00 | 0.00 |
| RNF150 | 0.08 | 0.56 | 1.00 | -0.01 | 0.94 | 1.00 | 0.01 | 0.95 | 1.00 | -0.16 | 0.34 | 1.00 | -0.54 | 0.00 | 0.11 | -1.00 | 0.00 | 0.00 |
| HIST1H1A | 0.09 | 0.50 | 1.00 | 0.11 | 0.41 | 1.00 | -0.02 | 0.87 | 1.00 | -0.11 | 0.41 | 1.00 | -0.54 | 0.00 | 0.13 | -0.99 | 0.00 | 0.00 |
| AK4 | 0.05 | 0.70 | 1.00 | -0.05 | 0.73 | 1.00 | 0.03 | 0.80 | 1.00 | -0.04 | 0.79 | 1.00 | -0.41 | 0.00 | 0.15 | -0.76 | 0.00 | 0.00 |
| CBLB | 0.20 | 0.36 | 1.00 | -0.22 | 0.22 | 1.00 | -0.17 | 0.41 | 1.00 | -0.36 | 0.16 | 1.00 | -0.76 | 0.00 | 0.16 | -0.80 | 0.00 | 0.00 |
| SCN9A | -0.01 | 0.94 | 1.00 | -0.05 | 0.70 | 1.00 | -0.03 | 0.78 | 1.00 | -0.11 | 0.47 | 1.00 | -0.42 | 0.00 | 0.17 | -0.82 | 0.00 | 0.00 |
| KCNQ5 | 0.14 | 0.47 | 1.00 | -0.06 | 0.71 | 1.00 | -0.05 | 0.80 | 1.00 | -0.07 | 0.76 | 1.00 | -0.59 | 0.00 | 0.22 | -1.20 | 0.00 | 0.00 |
| SEMA5A | 0.15 | 0.37 | 1.00 | -0.15 | 0.38 | 1.00 | 0.01 | 0.94 | 1.00 | -0.19 | 0.36 | 1.00 | -0.64 | 0.00 | 0.25 | -1.25 | 0.00 | 0.00 |
| HIST1H4H | 0.13 | 0.28 | 1.00 | 0.19 | 0.15 | 1.00 | 0.05 | 0.70 | 1.00 | -0.06 | 0.68 | 1.00 | -0.58 | 0.00 | 0.25 | -0.89 | 0.00 | 0.00 |
| ADAMTSL1 | 0.09 | 0.49 | 1.00 | -0.02 | 0.90 | 1.00 | 0.00 | 1.00 | 1.00 | -0.10 | 0.45 | 1.00 | -0.44 | 0.00 | 0.25 | -0.70 | 0.00 | 0.00 |
| FLRT2 | 0.07 | 0.65 | 1.00 | -0.09 | 0.59 | 1.00 | -0.06 | 0.69 | 1.00 | -0.12 | 0.49 | 1.00 | -0.50 | 0.00 | 0.25 | -0.98 | 0.00 | 0.00 |
| MYO7B | 0.11 | 0.50 | 1.00 | -0.07 | 0.73 | 1.00 | 0.05 | 0.76 | 1.00 | -0.12 | 0.38 | 1.00 | -0.49 | 0.01 | 0.26 | -0.85 | 0.00 | 0.00 |
| MOK | 0.07 | 0.55 | 1.00 | -0.05 | 0.69 | 1.00 | -0.02 | 0.84 | 1.00 | -0.04 | 0.74 | 1.00 | -0.37 | 0.01 | 0.28 | -0.75 | 0.00 | 0.00 |
| HIST1H4A | 0.27 | 0.10 | 1.00 | 0.08 | 0.63 | 1.00 | 0.09 | 0.53 | 1.00 | 0.01 | 0.96 | 1.00 | -0.65 | 0.01 | 0.31 | -1.05 | 0.00 | 0.00 |
| TBL1X | 0.21 | 0.18 | 1.00 | -0.15 | 0.39 | 1.00 | 0.03 | 0.84 | 1.00 | -0.08 | 0.67 | 1.00 | -0.50 | 0.01 | 0.31 | -0.80 | 0.00 | 0.00 |
| DIAPH2 | -0.06 | 0.64 | 1.00 | -0.16 | 0.24 | 1.00 | -0.10 | 0.43 | 1.00 | -0.15 | 0.27 | 1.00 | -0.40 | 0.01 | 0.31 | -0.62 | 0.00 | 0.00 |
| TTLL12 | 0.18 | 0.20 | 1.00 | 0.01 | 0.96 | 1.00 | 0.02 | 0.88 | 1.00 | -0.10 | 0.41 | 1.00 | -0.42 | 0.01 | 0.31 | -0.50 | 0.01 | 0.03 |
| SLC7A2 | 0.00 | 0.99 | 1.00 | -0.17 | 0.23 | 1.00 | -0.07 | 0.60 | 1.00 | -0.11 | 0.45 | 1.00 | -0.38 | 0.01 | 0.36 | -0.69 | 0.00 | 0.00 |
| BNC2 | 0.15 | 0.39 | 1.00 | -0.06 | 0.74 | 1.00 | 0.03 | 0.84 | 1.00 | -0.14 | 0.49 | 1.00 | -0.51 | 0.01 | 0.41 | -0.64 | 0.00 | 0.01 |
| SCD | 0.05 | 0.71 | 1.00 | 0.02 | 0.86 | 1.00 | 0.03 | 0.83 | 1.00 | -0.05 | 0.71 | 1.00 | -0.42 | 0.01 | 0.41 | -1.06 | 0.00 | 0.00 |
| KCTD15 | -0.05 | 0.70 | 1.00 | -0.08 | 0.52 | 1.00 | -0.02 | 0.87 | 1.00 | -0.11 | 0.38 | 1.00 | -0.37 | 0.01 | 0.41 | -0.75 | 0.00 | 0.00 |
| HIST4H4 | 0.13 | 0.34 | 1.00 | 0.18 | 0.20 | 1.00 | 0.07 | 0.60 | 1.00 | -0.02 | 0.88 | 1.00 | -0.49 | 0.01 | 0.41 | -0.85 | 0.00 | 0.00 |
| SLC1A4 | 0.08 | 0.51 | 1.00 | 0.10 | 0.47 | 1.00 | 0.07 | 0.61 | 1.00 | -0.10 | 0.39 | 1.00 | -0.40 | 0.01 | 0.41 | -0.53 | 0.00 | 0.01 |
| CHRM3 | -0.03 | 0.90 | 1.00 | -0.20 | 0.41 | 1.00 | 0.03 | 0.88 | 1.00 | -0.13 | 0.56 | 1.00 | -0.65 | 0.01 | 0.44 | -1.33 | 0.00 | 0.00 |
| ADAM12 | 0.20 | 0.24 | 1.00 | -0.02 | 0.92 | 1.00 | 0.08 | 0.63 | 1.00 | -0.11 | 0.59 | 1.00 | -0.50 | 0.01 | 0.46 | -0.64 | 0.00 | 0.00 |
| CCDC80 | 0.11 | 0.41 | 1.00 | 0.20 | 0.19 | 1.00 | 0.12 | 0.38 | 1.00 | -0.15 | 0.23 | 1.00 | -0.47 | 0.02 | 0.47 | -1.08 | 0.00 | 0.00 |
| MSC | 0.01 | 0.97 | 1.00 | 0.02 | 0.91 | 1.00 | 0.03 | 0.84 | 1.00 | -0.03 | 0.79 | 1.00 | -0.36 | 0.02 | 0.47 | -0.96 | 0.00 | 0.00 |
| ADAMTS2 | -0.01 | 0.96 | 1.00 | 0.01 | 0.93 | 1.00 | 0.04 | 0.80 | 1.00 | -0.04 | 0.79 | 1.00 | -0.40 | 0.02 | 0.47 | -0.60 | 0.00 | 0.01 |
| KCNG1 | -0.04 | 0.77 | 1.00 | -0.03 | 0.85 | 1.00 | -0.03 | 0.85 | 1.00 | -0.06 | 0.72 | 1.00 | -0.41 | 0.02 | 0.56 | -0.84 | 0.00 | 0.00 |
| PPARGC1B | 0.26 | 0.24 | 1.00 | 0.04 | 0.87 | 1.00 | 0.07 | 0.75 | 1.00 | -0.12 | 0.62 | 1.00 | -0.63 | 0.02 | 0.56 | -1.03 | 0.00 | 0.00 |
| NRXN3 | 0.25 | 0.13 | 1.00 | 0.09 | 0.63 | 1.00 | 0.10 | 0.52 | 1.00 | -0.15 | 0.47 | 1.00 | -0.55 | 0.02 | 0.57 | -1.02 | 0.00 | 0.00 |
| SLC22A3 | 0.13 | 0.43 | 1.00 | -0.01 | 0.96 | 1.00 | 0.07 | 0.64 | 1.00 | -0.09 | 0.57 | 1.00 | -0.41 | 0.02 | 0.58 | -1.12 | 0.00 | 0.00 |
| HHIP | 0.04 | 0.83 | 1.00 | 0.08 | 0.67 | 1.00 | -0.01 | 0.94 | 1.00 | -0.13 | 0.48 | 1.00 | -0.42 | 0.02 | 0.58 | -0.85 | 0.00 | 0.00 |
| LEF1 | 0.21 | 0.34 | 1.00 | -0.13 | 0.54 | 1.00 | 0.00 | 1.00 | 1.00 | -0.22 | 0.37 | 1.00 | -0.58 | 0.02 | 0.58 | -0.59 | 0.00 | 0.02 |
| SIPA1L2 | 0.06 | 0.66 | 1.00 | 0.02 | 0.89 | 1.00 | 0.07 | 0.62 | 1.00 | -0.16 | 0.30 | 1.00 | -0.39 | 0.03 | 0.58 | -0.90 | 0.00 | 0.00 |
| HIST1H4E | 0.12 | 0.40 | 1.00 | 0.36 | 0.01 | 1.00 | 0.13 | 0.39 | 1.00 | -0.13 | 0.42 | 1.00 | -0.50 | 0.03 | 0.58 | -0.89 | 0.00 | 0.00 |
| NOP2 | 0.06 | 0.57 | 1.00 | -0.04 | 0.75 | 1.00 | -0.03 | 0.78 | 1.00 | -0.05 | 0.66 | 1.00 | -0.32 | 0.03 | 0.58 | -0.53 | 0.00 | 0.00 |
| CLCN5 | 0.03 | 0.85 | 1.00 | -0.18 | 0.34 | 1.00 | -0.12 | 0.50 | 1.00 | -0.18 | 0.37 | 1.00 | -0.46 | 0.03 | 0.58 | -0.65 | 0.00 | 0.01 |
| DPH2 | 0.07 | 0.54 | 1.00 | 0.02 | 0.89 | 1.00 | 0.02 | 0.86 | 1.00 | -0.09 | 0.49 | 1.00 | -0.35 | 0.03 | 0.58 | -0.49 | 0.00 | 0.01 |
| FHDC1 | 0.02 | 0.93 | 1.00 | -0.16 | 0.43 | 1.00 | -0.02 | 0.93 | 1.00 | -0.04 | 0.85 | 1.00 | -0.45 | 0.03 | 0.59 | -0.71 | 0.00 | 0.01 |
| SFXN2 | -0.12 | 0.47 | 1.00 | -0.17 | 0.32 | 1.00 | -0.11 | 0.52 | 1.00 | -0.18 | 0.29 | 1.00 | -0.41 | 0.03 | 0.59 | -0.51 | 0.00 | 0.02 |
| CMTM7 | 0.05 | 0.77 | 1.00 | 0.09 | 0.58 | 1.00 | -0.04 | 0.79 | 1.00 | -0.23 | 0.19 | 1.00 | -0.45 | 0.03 | 0.59 | -0.52 | 0.01 | 0.03 |
| ECM2 | -0.11 | 0.52 | 1.00 | -0.11 | 0.55 | 1.00 | -0.21 | 0.22 | 1.00 | -0.24 | 0.22 | 1.00 | -0.48 | 0.03 | 0.59 | -0.74 | 0.00 | 0.00 |
| CLMP | -0.02 | 0.83 | 1.00 | 0.03 | 0.81 | 1.00 | 0.05 | 0.66 | 1.00 | -0.05 | 0.66 | 1.00 | -0.30 | 0.03 | 0.61 | -0.73 | 0.00 | 0.00 |
| SPRYD3 | 0.05 | 0.67 | 1.00 | -0.09 | 0.55 | 1.00 | -0.06 | 0.61 | 1.00 | -0.14 | 0.29 | 1.00 | -0.34 | 0.03 | 0.61 | -0.53 | 0.00 | 0.01 |
| PDZRN3 | -0.10 | 0.56 | 1.00 | 0.05 | 0.78 | 1.00 | 0.01 | 0.95 | 1.00 | -0.06 | 0.71 | 1.00 | -0.41 | 0.03 | 0.62 | -0.85 | 0.00 | 0.00 |
| SOWAHD | -0.28 | 0.44 | 1.00 | -0.34 | 0.37 | 1.00 | -0.11 | 0.79 | 1.00 | -0.25 | 0.53 | 1.00 | -0.91 | 0.03 | 0.62 | -1.04 | 0.01 | 0.04 |
| HIST1H2BM | 0.24 | 0.35 | 1.00 | -0.02 | 0.93 | 1.00 | 0.12 | 0.63 | 1.00 | -0.09 | 0.75 | 1.00 | -0.61 | 0.03 | 0.62 | -1.26 | 0.00 | 0.00 |
| ACTG2 | 0.16 | 0.36 | 1.00 | -0.01 | 0.93 | 1.00 | 0.07 | 0.64 | 1.00 | -0.09 | 0.63 | 1.00 | -0.41 | 0.04 | 0.64 | -0.63 | 0.00 | 0.00 |
| CDH4 | 0.10 | 0.77 | 1.00 | 0.19 | 0.55 | 1.00 | -0.02 | 0.95 | 1.00 | -0.54 | 0.13 | 1.00 | -0.80 | 0.03 | 0.64 | -1.16 | 0.00 | 0.01 |
| VCAN | 0.15 | 0.31 | 1.00 | -0.10 | 0.48 | 1.00 | 0.07 | 0.63 | 1.00 | -0.06 | 0.75 | 1.00 | -0.40 | 0.04 | 0.66 | -0.81 | 0.00 | 0.00 |
| CBLN2 | -0.01 | 0.96 | 1.00 | 0.01 | 0.96 | 1.00 | -0.11 | 0.57 | 1.00 | -0.16 | 0.42 | 1.00 | -0.42 | 0.04 | 0.68 | -0.89 | 0.00 | 0.00 |
| ACTG1 | 0.05 | 0.63 | 1.00 | 0.01 | 0.93 | 1.00 | 0.08 | 0.46 | 1.00 | 0.00 | 1.00 | 1.00 | -0.32 | 0.04 | 0.68 | -0.65 | 0.00 | 0.00 |
| UNC5C | 0.11 | 0.73 | 1.00 | -0.12 | 0.70 | 1.00 | 0.00 | 0.99 | 1.00 | -0.06 | 0.84 | 1.00 | -0.67 | 0.04 | 0.68 | -1.09 | 0.00 | 0.01 |
| FKBP11 | 0.02 | 0.89 | 1.00 | -0.08 | 0.60 | 1.00 | 0.03 | 0.78 | 1.00 | -0.12 | 0.36 | 1.00 | -0.35 | 0.04 | 0.68 | -0.46 | 0.01 | 0.03 |
| PLP2 | 0.16 | 0.42 | 1.00 | -0.10 | 0.59 | 1.00 | -0.06 | 0.72 | 1.00 | -0.15 | 0.49 | 1.00 | -0.45 | 0.04 | 0.68 | -0.46 | 0.01 | 0.04 |
| COL15A1 | 0.01 | 0.98 | 1.00 | -0.22 | 0.22 | 1.00 | -0.16 | 0.36 | 1.00 | -0.17 | 0.32 | 1.00 | -0.38 | 0.05 | 0.72 | -0.87 | 0.00 | 0.00 |
| MMP16 | 0.02 | 0.86 | 1.00 | -0.10 | 0.51 | 1.00 | 0.00 | 0.99 | 1.00 | -0.08 | 0.60 | 1.00 | -0.29 | 0.05 | 0.72 | -0.59 | 0.00 | 0.00 |
| WDR4 | -0.12 | 0.42 | 1.00 | -0.08 | 0.58 | 1.00 | -0.06 | 0.67 | 1.00 | -0.12 | 0.46 | 1.00 | -0.32 | 0.05 | 0.72 | -0.62 | 0.00 | 0.00 |
| ADGRA3 | -0.07 | 0.60 | 1.00 | -0.04 | 0.76 | 1.00 | -0.04 | 0.75 | 1.00 | -0.04 | 0.74 | 1.00 | -0.28 | 0.05 | 0.72 | -0.55 | 0.00 | 0.00 |
| ZNF804A | 0.24 | 0.29 | 1.00 | -0.14 | 0.49 | 1.00 | -0.08 | 0.70 | 1.00 | -0.13 | 0.65 | 1.00 | -0.49 | 0.05 | 0.72 | -0.56 | 0.00 | 0.01 |
| ZDHHC14 | -0.21 | 0.48 | 1.00 | 0.01 | 0.97 | 1.00 | 0.01 | 0.96 | 1.00 | -0.15 | 0.61 | 1.00 | -0.68 | 0.05 | 0.72 | -0.87 | 0.00 | 0.02 |
| GPC6 | 0.00 | 1.00 | 1.00 | -0.10 | 0.50 | 1.00 | -0.09 | 0.54 | 1.00 | -0.21 | 0.27 | 1.00 | -0.35 | 0.05 | 0.72 | -0.44 | 0.00 | 0.03 |
| ECE2 | -0.07 | 0.73 | 1.00 | -0.22 | 0.32 | 1.00 | -0.05 | 0.79 | 1.00 | -0.06 | 0.76 | 1.00 | -0.45 | 0.05 | 0.72 | -0.56 | 0.01 | 0.04 |
| COLGALT1 | 0.08 | 0.47 | 1.00 | 0.02 | 0.87 | 1.00 | 0.06 | 0.59 | 1.00 | -0.09 | 0.43 | 1.00 | -0.31 | 0.05 | 0.72 | -0.46 | 0.01 | 0.04 |
| ARHGAP26 | 0.08 | 0.60 | 1.00 | -0.18 | 0.27 | 1.00 | -0.13 | 0.38 | 1.00 | -0.25 | 0.17 | 1.00 | -0.42 | 0.05 | 0.72 | -0.46 | 0.01 | 0.04 |
| KLF12 | 0.15 | 0.32 | 1.00 | -0.08 | 0.62 | 1.00 | 0.02 | 0.93 | 1.00 | -0.11 | 0.61 | 1.00 | -0.35 | 0.06 | 0.74 | -0.53 | 0.00 | 0.00 |
| USP2-AS1 | -0.39 | 0.21 | 1.00 | -0.16 | 0.61 | 1.00 | -0.22 | 0.48 | 1.00 | -0.50 | 0.12 | 1.00 | -0.63 | 0.06 | 0.76 | -1.05 | 0.00 | 0.01 |
| PLXDC2 | 0.16 | 0.35 | 1.00 | -0.09 | 0.64 | 1.00 | 0.10 | 0.54 | 1.00 | -0.07 | 0.73 | 1.00 | -0.37 | 0.06 | 0.77 | -0.61 | 0.00 | 0.02 |
| CLN6 | 0.01 | 0.95 | 1.00 | 0.00 | 0.99 | 1.00 | 0.03 | 0.83 | 1.00 | -0.11 | 0.34 | 1.00 | -0.29 | 0.06 | 0.77 | -0.41 | 0.01 | 0.04 |
| PDK1 | -0.01 | 0.92 | 1.00 | -0.08 | 0.55 | 1.00 | -0.06 | 0.66 | 1.00 | -0.09 | 0.51 | 1.00 | -0.28 | 0.06 | 0.79 | -0.63 | 0.00 | 0.00 |
| MTHFD1L | 0.12 | 0.32 | 1.00 | 0.12 | 0.43 | 1.00 | 0.16 | 0.21 | 1.00 | -0.07 | 0.56 | 1.00 | -0.31 | 0.07 | 0.79 | -0.58 | 0.00 | 0.01 |
| SLITRK5 | 0.10 | 0.55 | 1.00 | -0.02 | 0.90 | 1.00 | 0.05 | 0.77 | 1.00 | -0.26 | 0.17 | 1.00 | -0.42 | 0.07 | 0.79 | -0.58 | 0.00 | 0.02 |
| RSAD1 | -0.09 | 0.56 | 1.00 | -0.21 | 0.16 | 1.00 | -0.06 | 0.71 | 1.00 | -0.06 | 0.73 | 1.00 | -0.34 | 0.06 | 0.79 | -0.45 | 0.00 | 0.02 |
| AUTS2 | 0.01 | 0.97 | 1.00 | -0.18 | 0.39 | 1.00 | -0.08 | 0.74 | 1.00 | -0.34 | 0.12 | 1.00 | -0.52 | 0.07 | 0.79 | -0.66 | 0.00 | 0.02 |
| DCLRE1B | 0.08 | 0.62 | 1.00 | -0.14 | 0.36 | 1.00 | -0.05 | 0.75 | 1.00 | -0.08 | 0.65 | 1.00 | -0.32 | 0.07 | 0.79 | -0.42 | 0.01 | 0.03 |
| COL6A3 | 0.07 | 0.60 | 1.00 | 0.09 | 0.53 | 1.00 | 0.15 | 0.25 | 1.00 | -0.02 | 0.88 | 1.00 | -0.29 | 0.07 | 0.79 | -0.50 | 0.01 | 0.04 |
| PRICKLE1 | 0.10 | 0.51 | 1.00 | -0.07 | 0.68 | 1.00 | 0.10 | 0.49 | 1.00 | -0.07 | 0.68 | 1.00 | -0.31 | 0.08 | 0.83 | -0.52 | 0.00 | 0.01 |
| KCTD12 | 0.08 | 0.59 | 1.00 | -0.01 | 0.98 | 1.00 | 0.09 | 0.55 | 1.00 | -0.17 | 0.41 | 1.00 | -0.29 | 0.09 | 0.85 | -0.86 | 0.00 | 0.00 |
| KIAA1644 | 0.03 | 0.82 | 1.00 | 0.02 | 0.91 | 1.00 | 0.02 | 0.88 | 1.00 | -0.04 | 0.77 | 1.00 | -0.29 | 0.09 | 0.85 | -0.88 | 0.00 | 0.00 |
| STEAP3 | 0.10 | 0.61 | 1.00 | 0.23 | 0.27 | 1.00 | 0.10 | 0.62 | 1.00 | 0.07 | 0.72 | 1.00 | -0.40 | 0.09 | 0.85 | -0.90 | 0.00 | 0.00 |
| LINC01224 | 0.13 | 0.42 | 1.00 | -0.07 | 0.65 | 1.00 | -0.03 | 0.83 | 1.00 | -0.11 | 0.48 | 1.00 | -0.33 | 0.08 | 0.85 | -0.63 | 0.00 | 0.00 |
| AKAP1 | 0.13 | 0.31 | 1.00 | -0.08 | 0.59 | 1.00 | 0.06 | 0.63 | 1.00 | -0.12 | 0.38 | 1.00 | -0.25 | 0.10 | 0.85 | -0.59 | 0.00 | 0.00 |
| BICC1 | 0.01 | 0.94 | 1.00 | -0.06 | 0.66 | 1.00 | -0.05 | 0.70 | 1.00 | -0.11 | 0.43 | 1.00 | -0.24 | 0.09 | 0.85 | -0.52 | 0.00 | 0.00 |
| TGFBI | 0.11 | 0.31 | 1.00 | 0.12 | 0.31 | 1.00 | 0.13 | 0.24 | 1.00 | 0.08 | 0.46 | 1.00 | -0.23 | 0.10 | 0.85 | -0.50 | 0.00 | 0.01 |
| PRUNE2 | 0.20 | 0.32 | 1.00 | -0.10 | 0.64 | 1.00 | 0.00 | 0.99 | 1.00 | -0.11 | 0.66 | 1.00 | -0.39 | 0.09 | 0.85 | -0.64 | 0.00 | 0.01 |
| PRRT3-AS1 | 0.08 | 0.74 | 1.00 | -0.03 | 0.91 | 1.00 | -0.03 | 0.92 | 1.00 | -0.14 | 0.57 | 1.00 | -0.45 | 0.10 | 0.85 | -0.83 | 0.00 | 0.01 |
| NEK6 | 0.06 | 0.63 | 1.00 | 0.04 | 0.78 | 1.00 | 0.04 | 0.74 | 1.00 | -0.05 | 0.65 | 1.00 | -0.27 | 0.09 | 0.85 | -0.50 | 0.00 | 0.02 |
| SLC19A1 | 0.02 | 0.87 | 1.00 | -0.03 | 0.87 | 1.00 | 0.03 | 0.84 | 1.00 | -0.16 | 0.25 | 1.00 | -0.32 | 0.08 | 0.85 | -0.57 | 0.00 | 0.02 |
| APBB2 | 0.21 | 0.22 | 1.00 | -0.07 | 0.67 | 1.00 | 0.02 | 0.92 | 1.00 | -0.06 | 0.78 | 1.00 | -0.32 | 0.09 | 0.85 | -0.46 | 0.00 | 0.02 |
| IRX5 | 0.27 | 0.37 | 1.00 | 0.28 | 0.37 | 1.00 | 0.02 | 0.95 | 1.00 | -0.14 | 0.65 | 1.00 | -0.58 | 0.10 | 0.85 | -1.00 | 0.01 | 0.03 |
| TTLL11 | -0.06 | 0.84 | 1.00 | -0.22 | 0.50 | 1.00 | -0.10 | 0.74 | 1.00 | -0.41 | 0.18 | 1.00 | -0.55 | 0.09 | 0.85 | -0.91 | 0.01 | 0.03 |
| RUNX2 | 0.22 | 0.33 | 1.00 | -0.16 | 0.44 | 1.00 | 0.01 | 0.98 | 1.00 | -0.14 | 0.78 | 1.00 | -0.50 | 0.10 | 0.86 | -0.69 | 0.00 | 0.01 |
| USP31 | 0.01 | 0.95 | 1.00 | -0.05 | 0.73 | 1.00 | 0.05 | 0.68 | 1.00 | -0.07 | 0.62 | 1.00 | -0.24 | 0.11 | 0.86 | -0.47 | 0.00 | 0.01 |
| TCP11L1 | 0.14 | 0.42 | 1.00 | -0.12 | 0.39 | 1.00 | -0.04 | 0.81 | 1.00 | -0.05 | 0.80 | 1.00 | -0.30 | 0.10 | 0.86 | -0.40 | 0.01 | 0.03 |
| ZNF624 | -0.14 | 0.26 | 1.00 | -0.08 | 0.59 | 1.00 | -0.05 | 0.68 | 1.00 | -0.08 | 0.51 | 1.00 | -0.25 | 0.11 | 0.86 | -0.43 | 0.01 | 0.04 |
| C12orf66 | 0.07 | 0.64 | 1.00 | 0.02 | 0.93 | 1.00 | 0.07 | 0.63 | 1.00 | -0.10 | 0.53 | 1.00 | -0.31 | 0.10 | 0.86 | -0.49 | 0.01 | 0.04 |
| FRAS1 | 0.16 | 0.36 | 1.00 | -0.07 | 0.73 | 1.00 | 0.09 | 0.60 | 1.00 | -0.01 | 0.95 | 1.00 | -0.37 | 0.11 | 0.87 | -0.62 | 0.00 | 0.01 |
| WT1 | 0.10 | 0.60 | 1.00 | -0.26 | 0.23 | 1.00 | 0.03 | 0.89 | 1.00 | -0.12 | 0.58 | 1.00 | -0.36 | 0.11 | 0.87 | -0.65 | 0.00 | 0.03 |
| TENM2 | 0.21 | 0.20 | 1.00 | 0.08 | 0.65 | 1.00 | 0.19 | 0.24 | 1.00 | 0.01 | 0.94 | 1.00 | -0.35 | 0.12 | 0.90 | -1.19 | 0.00 | 0.00 |
| BEND3 | 0.06 | 0.67 | 1.00 | -0.06 | 0.73 | 1.00 | 0.03 | 0.84 | 1.00 | -0.08 | 0.56 | 1.00 | -0.26 | 0.13 | 0.90 | -0.83 | 0.00 | 0.00 |
| HK2 | 0.15 | 0.36 | 1.00 | 0.17 | 0.44 | 1.00 | 0.34 | 0.05 | 1.00 | 0.06 | 0.72 | 1.00 | -0.33 | 0.12 | 0.90 | -1.05 | 0.00 | 0.00 |
| NRP1 | 0.13 | 0.28 | 1.00 | 0.11 | 0.46 | 1.00 | 0.15 | 0.25 | 1.00 | -0.02 | 0.88 | 1.00 | -0.23 | 0.12 | 0.90 | -0.70 | 0.00 | 0.00 |
| 43354.00 | -0.07 | 0.53 | 1.00 | -0.05 | 0.65 | 1.00 | -0.03 | 0.82 | 1.00 | -0.06 | 0.59 | 1.00 | -0.19 | 0.12 | 0.90 | -0.45 | 0.00 | 0.01 |
| KRT81 | -0.25 | 0.51 | 1.00 | 0.02 | 0.96 | 1.00 | 0.07 | 0.84 | 1.00 | 0.02 | 0.97 | 1.00 | -0.65 | 0.12 | 0.90 | -1.38 | 0.00 | 0.01 |
| MRPL15 | 0.06 | 0.59 | 1.00 | 0.04 | 0.73 | 1.00 | 0.09 | 0.45 | 1.00 | 0.04 | 0.69 | 1.00 | -0.22 | 0.12 | 0.90 | -0.39 | 0.01 | 0.03 |
| VARS | -0.04 | 0.71 | 1.00 | 0.00 | 0.99 | 1.00 | 0.06 | 0.65 | 1.00 | -0.07 | 0.62 | 1.00 | -0.22 | 0.13 | 0.90 | -0.43 | 0.01 | 0.03 |
| KRT79 | -0.22 | 0.52 | 1.00 | -0.40 | 0.30 | 1.00 | -0.28 | 0.44 | 1.00 | -0.35 | 0.36 | 1.00 | -0.61 | 0.13 | 0.90 | -1.17 | 0.01 | 0.03 |
| CTD-2377D24.6 | 0.17 | 0.51 | 1.00 | -0.09 | 0.67 | 1.00 | -0.04 | 0.88 | 1.00 | -0.15 | 0.57 | 1.00 | -0.42 | 0.13 | 0.90 | -0.53 | 0.01 | 0.04 |
| SSBP2 | 0.05 | 0.71 | 1.00 | -0.05 | 0.73 | 1.00 | -0.02 | 0.87 | 1.00 | -0.10 | 0.51 | 1.00 | -0.24 | 0.13 | 0.90 | -0.39 | 0.01 | 0.04 |
| SNAI2 | 0.08 | 0.51 | 1.00 | 0.00 | 0.99 | 1.00 | 0.05 | 0.70 | 1.00 | -0.11 | 0.45 | 1.00 | -0.25 | 0.13 | 0.90 | -0.86 | 0.00 | 0.00 |
| GFRA1 | 0.01 | 0.90 | 1.00 | -0.03 | 0.82 | 1.00 | 0.00 | 0.99 | 1.00 | -0.01 | 0.94 | 1.00 | -0.20 | 0.13 | 0.90 | -0.54 | 0.00 | 0.00 |
| GEMIN5 | 0.01 | 0.94 | 1.00 | 0.05 | 0.71 | 1.00 | 0.07 | 0.54 | 1.00 | 0.04 | 0.69 | 1.00 | -0.19 | 0.14 | 0.90 | -0.50 | 0.00 | 0.00 |
| MYB | -0.15 | 0.58 | 1.00 | 0.14 | 0.61 | 1.00 | 0.05 | 0.86 | 1.00 | -0.16 | 0.56 | 1.00 | -0.45 | 0.14 | 0.90 | -0.86 | 0.00 | 0.02 |
| FXN | -0.12 | 0.40 | 1.00 | -0.02 | 0.88 | 1.00 | 0.11 | 0.43 | 1.00 | -0.08 | 0.55 | 1.00 | -0.26 | 0.14 | 0.90 | -0.47 | 0.01 | 0.04 |
| TRAM2 | 0.24 | 0.19 | 1.00 | 0.02 | 0.91 | 1.00 | 0.10 | 0.54 | 1.00 | -0.06 | 0.75 | 1.00 | -0.35 | 0.13 | 0.90 | -0.49 | 0.01 | 0.05 |
| FAM198B | 0.01 | 0.93 | 1.00 | 0.05 | 0.79 | 1.00 | 0.06 | 0.65 | 1.00 | -0.14 | 0.41 | 1.00 | -0.25 | 0.14 | 0.92 | -0.86 | 0.00 | 0.00 |
| ST3GAL1 | 0.07 | 0.63 | 1.00 | 0.03 | 0.84 | 1.00 | 0.05 | 0.72 | 1.00 | -0.02 | 0.88 | 1.00 | -0.24 | 0.15 | 0.92 | -1.17 | 0.00 | 0.00 |
| NR2F1-AS1 | -0.10 | 0.55 | 1.00 | 0.09 | 0.62 | 1.00 | 0.13 | 0.44 | 1.00 | 0.02 | 0.89 | 1.00 | -0.27 | 0.15 | 0.92 | -0.68 | 0.00 | 0.00 |
| SESTD1 | -0.07 | 0.54 | 1.00 | -0.11 | 0.43 | 1.00 | -0.06 | 0.62 | 1.00 | -0.07 | 0.60 | 1.00 | -0.21 | 0.15 | 0.92 | -0.47 | 0.00 | 0.01 |
| EPHA5 | 0.10 | 0.50 | 1.00 | -0.02 | 0.91 | 1.00 | 0.07 | 0.62 | 1.00 | -0.17 | 0.41 | 1.00 | -0.29 | 0.15 | 0.92 | -0.53 | 0.00 | 0.01 |
| LHFPL2 | 0.08 | 0.46 | 1.00 | -0.03 | 0.84 | 1.00 | 0.03 | 0.78 | 1.00 | 0.00 | 0.98 | 1.00 | -0.19 | 0.14 | 0.92 | -0.41 | 0.00 | 0.01 |
| LSM11 | -0.05 | 0.66 | 1.00 | -0.03 | 0.84 | 1.00 | 0.01 | 0.94 | 1.00 | 0.00 | 0.98 | 1.00 | -0.23 | 0.15 | 0.92 | -0.45 | 0.00 | 0.02 |
| PGM5P2 | -0.23 | 0.36 | 1.00 | 0.03 | 0.91 | 1.00 | -0.06 | 0.82 | 1.00 | -0.24 | 0.31 | 1.00 | -0.39 | 0.15 | 0.92 | -0.66 | 0.01 | 0.04 |
| COL12A1 | 0.15 | 0.25 | 1.00 | -0.13 | 0.39 | 1.00 | 0.07 | 0.63 | 1.00 | -0.02 | 0.92 | 1.00 | -0.23 | 0.16 | 0.96 | -0.44 | 0.00 | 0.02 |
| LINC00941 | 0.06 | 0.71 | 1.00 | 0.03 | 0.85 | 1.00 | 0.07 | 0.70 | 1.00 | 0.02 | 0.91 | 1.00 | -0.28 | 0.16 | 0.97 | -0.60 | 0.00 | 0.01 |
| HEATR1 | -0.07 | 0.53 | 1.00 | -0.16 | 0.21 | 1.00 | -0.04 | 0.74 | 1.00 | -0.04 | 0.70 | 1.00 | -0.19 | 0.17 | 0.99 | -0.45 | 0.00 | 0.01 |
| AC005682.5 | 0.06 | 0.65 | 1.00 | -0.10 | 0.50 | 1.00 | 0.08 | 0.59 | 1.00 | -0.11 | 0.47 | 1.00 | -0.23 | 0.17 | 0.99 | -0.45 | 0.01 | 0.03 |
| IGFBP5 | 0.26 | 0.22 | 1.00 | 0.12 | 0.57 | 1.00 | 0.15 | 0.43 | 1.00 | 0.02 | 0.92 | 1.00 | -0.26 | 0.33 | 1.00 | -1.43 | 0.00 | 0.00 |
| MYOCD | 0.01 | 0.94 | 1.00 | -0.08 | 0.67 | 1.00 | 0.10 | 0.56 | 1.00 | 0.09 | 0.66 | 1.00 | -0.11 | 0.61 | 1.00 | -1.17 | 0.00 | 0.00 |
| PAPPA | 0.08 | 0.56 | 1.00 | 0.13 | 0.43 | 1.00 | 0.17 | 0.24 | 1.00 | 0.06 | 0.69 | 1.00 | -0.21 | 0.31 | 1.00 | -1.20 | 0.00 | 0.00 |
| GDF6 | 0.16 | 0.17 | 1.00 | 0.19 | 0.17 | 1.00 | 0.23 | 0.08 | 1.00 | 0.15 | 0.25 | 1.00 | 0.06 | 0.69 | 1.00 | -0.95 | 0.00 | 0.00 |
| ADAMTS1 | 0.08 | 0.52 | 1.00 | 0.13 | 0.34 | 1.00 | 0.21 | 0.12 | 1.00 | 0.11 | 0.49 | 1.00 | 0.07 | 0.61 | 1.00 | -0.85 | 0.00 | 0.00 |
| AMIGO2 | -0.06 | 0.62 | 1.00 | -0.03 | 0.80 | 1.00 | 0.00 | 0.98 | 1.00 | -0.01 | 0.93 | 1.00 | -0.16 | 0.28 | 1.00 | -0.81 | 0.00 | 0.00 |
| CAV1 | -0.07 | 0.48 | 1.00 | -0.01 | 0.93 | 1.00 | 0.00 | 0.98 | 1.00 | -0.02 | 0.89 | 1.00 | -0.15 | 0.28 | 1.00 | -0.78 | 0.00 | 0.00 |
| CEMIP | 0.08 | 0.59 | 1.00 | 0.12 | 0.51 | 1.00 | 0.29 | 0.07 | 1.00 | 0.19 | 0.22 | 1.00 | 0.01 | 0.95 | 1.00 | -1.00 | 0.00 | 0.00 |
| FAM46A | 0.06 | 0.66 | 1.00 | 0.00 | 0.97 | 1.00 | 0.07 | 0.59 | 1.00 | -0.03 | 0.80 | 1.00 | -0.15 | 0.33 | 1.00 | -0.73 | 0.00 | 0.00 |
| CDH11 | 0.06 | 0.57 | 1.00 | 0.11 | 0.39 | 1.00 | 0.11 | 0.34 | 1.00 | 0.09 | 0.47 | 1.00 | 0.02 | 0.86 | 1.00 | -0.62 | 0.00 | 0.00 |
| KRT14 | 0.08 | 0.65 | 1.00 | 0.00 | 0.99 | 1.00 | 0.22 | 0.22 | 1.00 | 0.08 | 0.63 | 1.00 | -0.24 | 0.28 | 1.00 | -1.03 | 0.00 | 0.00 |
| IRS1 | 0.18 | 0.28 | 1.00 | -0.08 | 0.61 | 1.00 | 0.04 | 0.82 | 1.00 | -0.08 | 0.66 | 1.00 | -0.20 | 0.28 | 1.00 | -0.74 | 0.00 | 0.00 |
| ACTC1 | 0.03 | 0.80 | 1.00 | -0.05 | 0.71 | 1.00 | 0.12 | 0.29 | 1.00 | 0.04 | 0.80 | 1.00 | -0.03 | 0.83 | 1.00 | -0.66 | 0.00 | 0.00 |
| ARNT2 | 0.23 | 0.15 | 1.00 | 0.05 | 0.80 | 1.00 | 0.19 | 0.20 | 1.00 | 0.00 | 0.99 | 1.00 | -0.29 | 0.19 | 1.00 | -0.84 | 0.00 | 0.00 |
| SLC39A10 | -0.01 | 0.92 | 1.00 | -0.08 | 0.54 | 1.00 | -0.03 | 0.78 | 1.00 | -0.04 | 0.78 | 1.00 | -0.15 | 0.27 | 1.00 | -0.60 | 0.00 | 0.00 |
| KLF7 | 0.16 | 0.34 | 1.00 | -0.01 | 0.97 | 1.00 | 0.12 | 0.45 | 1.00 | -0.09 | 0.65 | 1.00 | -0.15 | 0.49 | 1.00 | -0.78 | 0.00 | 0.00 |
| XDH | 0.06 | 0.69 | 1.00 | 0.06 | 0.74 | 1.00 | 0.18 | 0.27 | 1.00 | 0.17 | 0.27 | 1.00 | -0.05 | 0.80 | 1.00 | -0.78 | 0.00 | 0.00 |
| DMD | -0.09 | 0.46 | 1.00 | -0.06 | 0.70 | 1.00 | -0.04 | 0.76 | 1.00 | -0.10 | 0.44 | 1.00 | -0.14 | 0.34 | 1.00 | -0.64 | 0.00 | 0.00 |
| PMEPA1 | -0.26 | 0.10 | 1.00 | -0.09 | 0.60 | 1.00 | 0.01 | 0.95 | 1.00 | 0.01 | 0.96 | 1.00 | -0.12 | 0.49 | 1.00 | -0.70 | 0.00 | 0.00 |
| BCAT1 | -0.06 | 0.63 | 1.00 | -0.02 | 0.91 | 1.00 | 0.04 | 0.73 | 1.00 | -0.06 | 0.64 | 1.00 | -0.17 | 0.24 | 1.00 | -0.62 | 0.00 | 0.00 |
| SLC2A1 | 0.11 | 0.32 | 1.00 | 0.11 | 0.37 | 1.00 | 0.17 | 0.13 | 1.00 | 0.08 | 0.45 | 1.00 | -0.14 | 0.30 | 1.00 | -0.62 | 0.00 | 0.00 |
| CRISPLD2 | 0.17 | 0.22 | 1.00 | 0.05 | 0.74 | 1.00 | 0.15 | 0.27 | 1.00 | 0.05 | 0.72 | 1.00 | -0.17 | 0.29 | 1.00 | -0.69 | 0.00 | 0.00 |
| CTD-2033D15.2 | 0.34 | 0.05 | 1.00 | 0.10 | 0.60 | 1.00 | 0.27 | 0.13 | 1.00 | -0.08 | 0.70 | 1.00 | -0.19 | 0.33 | 1.00 | -0.80 | 0.00 | 0.00 |
| MICAL2 | 0.10 | 0.43 | 1.00 | 0.00 | 0.98 | 1.00 | 0.15 | 0.23 | 1.00 | 0.02 | 0.90 | 1.00 | -0.19 | 0.26 | 1.00 | -0.69 | 0.00 | 0.00 |
| DDN | -0.19 | 0.33 | 1.00 | -0.29 | 0.19 | 1.00 | -0.13 | 0.52 | 1.00 | -0.16 | 0.45 | 1.00 | -0.24 | 0.24 | 1.00 | -0.83 | 0.00 | 0.00 |
| MIR210HG | 0.00 | 0.99 | 1.00 | -0.07 | 0.71 | 1.00 | -0.01 | 0.95 | 1.00 | -0.17 | 0.41 | 1.00 | -0.30 | 0.19 | 1.00 | -0.84 | 0.00 | 0.00 |
| BCAR3 | 0.14 | 0.25 | 1.00 | 0.08 | 0.55 | 1.00 | 0.13 | 0.30 | 1.00 | 0.11 | 0.38 | 1.00 | -0.05 | 0.73 | 1.00 | -0.56 | 0.00 | 0.00 |
| SERPINE1 | 0.21 | 0.17 | 1.00 | 0.09 | 0.59 | 1.00 | 0.27 | 0.06 | 1.00 | 0.21 | 0.17 | 1.00 | 0.08 | 0.62 | 1.00 | -0.65 | 0.00 | 0.00 |
| BHLHA15 | -0.12 | 0.60 | 1.00 | -0.19 | 0.44 | 1.00 | -0.17 | 0.43 | 1.00 | -0.20 | 0.36 | 1.00 | -0.28 | 0.22 | 1.00 | -0.88 | 0.00 | 0.00 |
| LRIG1 | 0.04 | 0.76 | 1.00 | 0.05 | 0.73 | 1.00 | 0.11 | 0.41 | 1.00 | 0.10 | 0.42 | 1.00 | -0.06 | 0.68 | 1.00 | -0.57 | 0.00 | 0.00 |
| RBFA | 0.01 | 0.97 | 1.00 | -0.01 | 0.92 | 1.00 | 0.04 | 0.74 | 1.00 | 0.04 | 0.78 | 1.00 | -0.20 | 0.23 | 1.00 | -0.56 | 0.00 | 0.00 |
| DGKI | 0.06 | 0.62 | 1.00 | 0.00 | 1.00 | 1.00 | 0.09 | 0.51 | 1.00 | 0.03 | 0.84 | 1.00 | -0.18 | 0.23 | 1.00 | -0.59 | 0.00 | 0.00 |
| SPRY1 | 0.21 | 0.34 | 1.00 | 0.00 | 1.00 | 1.00 | 0.26 | 0.21 | 1.00 | 0.16 | 0.49 | 1.00 | -0.02 | 0.94 | 1.00 | -0.84 | 0.00 | 0.00 |
| PUS1 | 0.08 | 0.53 | 1.00 | 0.09 | 0.56 | 1.00 | 0.14 | 0.31 | 1.00 | -0.08 | 0.56 | 1.00 | -0.18 | 0.28 | 1.00 | -0.63 | 0.00 | 0.00 |
| EDIL3 | 0.02 | 0.85 | 1.00 | -0.06 | 0.73 | 1.00 | 0.01 | 0.94 | 1.00 | -0.13 | 0.49 | 1.00 | -0.21 | 0.18 | 1.00 | -0.53 | 0.00 | 0.00 |
| MYO1E | 0.11 | 0.33 | 1.00 | 0.05 | 0.72 | 1.00 | 0.11 | 0.34 | 1.00 | 0.08 | 0.48 | 1.00 | -0.07 | 0.59 | 1.00 | -0.50 | 0.00 | 0.00 |
| NLRP10 | -0.08 | 0.61 | 1.00 | -0.04 | 0.83 | 1.00 | 0.08 | 0.64 | 1.00 | -0.03 | 0.84 | 1.00 | -0.21 | 0.22 | 1.00 | -0.65 | 0.00 | 0.00 |
| AP000892.6 | 0.28 | 0.13 | 1.00 | 0.05 | 0.79 | 1.00 | 0.18 | 0.28 | 1.00 | -0.09 | 0.64 | 1.00 | -0.25 | 0.31 | 1.00 | -0.75 | 0.00 | 0.00 |
| LRRC8C | -0.03 | 0.87 | 1.00 | -0.24 | 0.16 | 1.00 | 0.03 | 0.86 | 1.00 | -0.09 | 0.70 | 1.00 | -0.23 | 0.23 | 1.00 | -0.62 | 0.00 | 0.00 |
| MTCL1 | 0.07 | 0.55 | 1.00 | 0.07 | 0.60 | 1.00 | 0.09 | 0.44 | 1.00 | -0.03 | 0.82 | 1.00 | -0.09 | 0.51 | 1.00 | -0.54 | 0.00 | 0.00 |
| LAMB1 | 0.02 | 0.87 | 1.00 | 0.05 | 0.72 | 1.00 | 0.10 | 0.37 | 1.00 | 0.06 | 0.64 | 1.00 | -0.12 | 0.35 | 1.00 | -0.50 | 0.00 | 0.00 |
| RP11-395G23.3 | -0.11 | 0.71 | 1.00 | -0.14 | 0.67 | 1.00 | 0.07 | 0.82 | 1.00 | -0.08 | 0.80 | 1.00 | -0.46 | 0.19 | 1.00 | -1.19 | 0.00 | 0.00 |
| FAT3 | -0.18 | 0.33 | 1.00 | -0.06 | 0.76 | 1.00 | 0.01 | 0.97 | 1.00 | 0.00 | 0.98 | 1.00 | -0.12 | 0.56 | 1.00 | -0.74 | 0.00 | 0.00 |
| PID1 | -0.01 | 0.97 | 1.00 | -0.04 | 0.77 | 1.00 | 0.00 | 0.98 | 1.00 | -0.02 | 0.88 | 1.00 | -0.21 | 0.19 | 1.00 | -0.57 | 0.00 | 0.00 |
| CACNG4 | 0.15 | 0.49 | 1.00 | 0.21 | 0.36 | 1.00 | 0.21 | 0.34 | 1.00 | 0.04 | 0.88 | 1.00 | -0.16 | 0.63 | 1.00 | -0.81 | 0.00 | 0.00 |
| PRKY | 0.06 | 0.65 | 1.00 | 0.01 | 0.95 | 1.00 | 0.04 | 0.77 | 1.00 | -0.06 | 0.67 | 1.00 | -0.21 | 0.23 | 1.00 | -0.55 | 0.00 | 0.01 |
| ACKR3 | 0.07 | 0.58 | 1.00 | -0.03 | 0.84 | 1.00 | 0.07 | 0.60 | 1.00 | 0.03 | 0.86 | 1.00 | 0.00 | 0.99 | 1.00 | -0.53 | 0.00 | 0.01 |
| COL13A1 | -0.06 | 0.79 | 1.00 | 0.05 | 0.84 | 1.00 | 0.22 | 0.34 | 1.00 | 0.03 | 0.88 | 1.00 | -0.34 | 0.19 | 1.00 | -0.85 | 0.00 | 0.01 |
| PTPRB | -0.03 | 0.81 | 1.00 | -0.03 | 0.85 | 1.00 | 0.14 | 0.24 | 1.00 | 0.10 | 0.45 | 1.00 | 0.01 | 0.97 | 1.00 | -0.55 | 0.00 | 0.01 |
| MAN2A1 | -0.02 | 0.86 | 1.00 | -0.02 | 0.85 | 1.00 | 0.01 | 0.94 | 1.00 | -0.02 | 0.88 | 1.00 | -0.15 | 0.26 | 1.00 | -0.48 | 0.00 | 0.01 |
| RCL1 | 0.02 | 0.84 | 1.00 | 0.05 | 0.71 | 1.00 | 0.06 | 0.63 | 1.00 | 0.05 | 0.68 | 1.00 | -0.15 | 0.30 | 1.00 | -0.49 | 0.00 | 0.01 |
| GDNF | 0.29 | 0.09 | 1.00 | 0.25 | 0.23 | 1.00 | 0.36 | 0.04 | 1.00 | -0.03 | 0.88 | 1.00 | -0.20 | 0.43 | 1.00 | -0.71 | 0.00 | 0.01 |
| TRIM58 | 0.11 | 0.53 | 1.00 | -0.02 | 0.91 | 1.00 | -0.01 | 0.98 | 1.00 | -0.01 | 0.94 | 1.00 | -0.14 | 0.52 | 1.00 | -0.58 | 0.00 | 0.01 |
| ROR1 | 0.08 | 0.57 | 1.00 | -0.03 | 0.86 | 1.00 | 0.07 | 0.65 | 1.00 | 0.04 | 0.83 | 1.00 | -0.18 | 0.27 | 1.00 | -0.57 | 0.00 | 0.01 |
| PIGW | 0.02 | 0.87 | 1.00 | 0.05 | 0.71 | 1.00 | 0.11 | 0.39 | 1.00 | -0.01 | 0.95 | 1.00 | -0.20 | 0.21 | 1.00 | -0.53 | 0.00 | 0.01 |
| TNFRSF21 | 0.17 | 0.35 | 1.00 | 0.12 | 0.59 | 1.00 | 0.21 | 0.30 | 1.00 | -0.03 | 0.87 | 1.00 | -0.20 | 0.39 | 1.00 | -0.74 | 0.00 | 0.01 |
| NFIL3 | 0.01 | 0.94 | 1.00 | 0.09 | 0.50 | 1.00 | 0.10 | 0.40 | 1.00 | 0.01 | 0.97 | 1.00 | -0.18 | 0.26 | 1.00 | -0.53 | 0.00 | 0.01 |
| WNT5A | -0.03 | 0.80 | 1.00 | -0.01 | 0.95 | 1.00 | 0.07 | 0.54 | 1.00 | 0.07 | 0.61 | 1.00 | 0.06 | 0.64 | 1.00 | -0.44 | 0.00 | 0.01 |
| CREB5 | 0.22 | 0.34 | 1.00 | -0.11 | 0.58 | 1.00 | 0.04 | 0.93 | 1.00 | -0.14 | 0.79 | 1.00 | -0.31 | 0.25 | 1.00 | -0.63 | 0.00 | 0.01 |
| SYT16 | 0.02 | 0.92 | 1.00 | 0.00 | 1.00 | 1.00 | 0.03 | 0.87 | 1.00 | -0.05 | 0.80 | 1.00 | -0.15 | 0.49 | 1.00 | -0.69 | 0.00 | 0.01 |
| TNC | 0.33 | 0.06 | 1.00 | 0.16 | 0.38 | 1.00 | 0.28 | 0.11 | 1.00 | 0.03 | 0.86 | 1.00 | -0.28 | 0.20 | 1.00 | -0.69 | 0.00 | 0.01 |
| DYRK2 | -0.01 | 0.96 | 1.00 | 0.03 | 0.84 | 1.00 | 0.06 | 0.57 | 1.00 | 0.01 | 0.93 | 1.00 | -0.03 | 0.80 | 1.00 | -0.42 | 0.00 | 0.01 |
| SNTB1 | -0.08 | 0.66 | 1.00 | -0.16 | 0.42 | 1.00 | -0.08 | 0.64 | 1.00 | -0.09 | 0.64 | 1.00 | -0.24 | 0.25 | 1.00 | -0.62 | 0.00 | 0.01 |
| DPYSL2 | 0.18 | 0.27 | 1.00 | 0.11 | 0.50 | 1.00 | 0.13 | 0.41 | 1.00 | -0.02 | 0.92 | 1.00 | -0.25 | 0.20 | 1.00 | -0.56 | 0.00 | 0.01 |
| FAM86DP | -0.03 | 0.88 | 1.00 | -0.19 | 0.30 | 1.00 | -0.01 | 0.94 | 1.00 | -0.06 | 0.71 | 1.00 | -0.13 | 0.51 | 1.00 | -0.55 | 0.00 | 0.02 |
| MTAP | -0.05 | 0.66 | 1.00 | 0.01 | 0.92 | 1.00 | 0.04 | 0.75 | 1.00 | 0.03 | 0.83 | 1.00 | 0.01 | 0.92 | 1.00 | -0.44 | 0.00 | 0.02 |
| TGFBR1 | -0.03 | 0.74 | 1.00 | -0.04 | 0.79 | 1.00 | 0.03 | 0.76 | 1.00 | -0.02 | 0.86 | 1.00 | -0.04 | 0.77 | 1.00 | -0.45 | 0.00 | 0.02 |
| TSPAN5 | 0.09 | 0.47 | 1.00 | 0.07 | 0.59 | 1.00 | 0.17 | 0.16 | 1.00 | 0.03 | 0.83 | 1.00 | -0.10 | 0.53 | 1.00 | -0.49 | 0.00 | 0.02 |
| RGMB | 0.09 | 0.45 | 1.00 | 0.01 | 0.95 | 1.00 | 0.10 | 0.43 | 1.00 | -0.01 | 0.95 | 1.00 | -0.09 | 0.56 | 1.00 | -0.45 | 0.00 | 0.02 |
| HAND2 | -0.09 | 0.74 | 1.00 | -0.21 | 0.45 | 1.00 | -0.04 | 0.89 | 1.00 | -0.10 | 0.71 | 1.00 | -0.33 | 0.26 | 1.00 | -0.88 | 0.00 | 0.02 |
| UCK2 | 0.08 | 0.47 | 1.00 | 0.10 | 0.46 | 1.00 | 0.16 | 0.18 | 1.00 | -0.02 | 0.85 | 1.00 | -0.18 | 0.23 | 1.00 | -0.50 | 0.00 | 0.02 |
| DCTPP1 | 0.04 | 0.74 | 1.00 | 0.02 | 0.87 | 1.00 | 0.10 | 0.45 | 1.00 | 0.08 | 0.59 | 1.00 | -0.15 | 0.41 | 1.00 | -0.51 | 0.00 | 0.02 |
| SLC25A37 | 0.03 | 0.80 | 1.00 | -0.06 | 0.66 | 1.00 | 0.05 | 0.65 | 1.00 | -0.02 | 0.85 | 1.00 | -0.04 | 0.79 | 1.00 | -0.43 | 0.00 | 0.02 |
| SLC4A4 | -0.04 | 0.76 | 1.00 | -0.03 | 0.83 | 1.00 | 0.04 | 0.75 | 1.00 | 0.03 | 0.84 | 1.00 | -0.12 | 0.45 | 1.00 | -0.45 | 0.00 | 0.02 |
| SRF | 0.06 | 0.62 | 1.00 | -0.05 | 0.68 | 1.00 | -0.02 | 0.89 | 1.00 | -0.09 | 0.43 | 1.00 | -0.17 | 0.27 | 1.00 | -0.47 | 0.00 | 0.02 |
| FLG | 0.18 | 0.33 | 1.00 | 0.28 | 0.17 | 1.00 | 0.36 | 0.05 | 1.00 | 0.24 | 0.25 | 1.00 | 0.19 | 0.39 | 1.00 | -0.56 | 0.00 | 0.02 |
| PEG10 | 0.14 | 0.39 | 1.00 | -0.01 | 0.97 | 1.00 | 0.08 | 0.58 | 1.00 | -0.10 | 0.63 | 1.00 | -0.27 | 0.23 | 1.00 | -0.50 | 0.00 | 0.02 |
| TAGLN3 | 0.00 | 1.00 | 1.00 | 0.41 | 0.42 | 1.00 | 0.24 | 0.64 | 1.00 | 0.17 | 0.73 | 1.00 | 0.04 | 0.93 | 1.00 | 1.22 | 0.00 | 0.02 |
| LRRC8D | 0.04 | 0.73 | 1.00 | -0.05 | 0.71 | 1.00 | -0.01 | 0.96 | 1.00 | -0.02 | 0.87 | 1.00 | -0.08 | 0.57 | 1.00 | -0.43 | 0.00 | 0.02 |
| LOXL1-AS1 | 0.06 | 0.68 | 1.00 | -0.03 | 0.83 | 1.00 | 0.02 | 0.86 | 1.00 | -0.04 | 0.77 | 1.00 | -0.18 | 0.21 | 1.00 | -0.42 | 0.00 | 0.02 |
| DCAF4 | -0.07 | 0.52 | 1.00 | -0.04 | 0.76 | 1.00 | 0.04 | 0.76 | 1.00 | 0.02 | 0.90 | 1.00 | -0.16 | 0.28 | 1.00 | -0.43 | 0.00 | 0.02 |
| PTPRK | 0.00 | 0.99 | 1.00 | -0.04 | 0.77 | 1.00 | 0.00 | 0.98 | 1.00 | -0.04 | 0.73 | 1.00 | -0.16 | 0.24 | 1.00 | -0.41 | 0.00 | 0.02 |
| PDLIM5 | 0.06 | 0.61 | 1.00 | -0.02 | 0.88 | 1.00 | 0.08 | 0.51 | 1.00 | 0.04 | 0.81 | 1.00 | 0.02 | 0.87 | 1.00 | -0.40 | 0.00 | 0.02 |
| BMPER | -0.05 | 0.85 | 1.00 | -0.02 | 0.94 | 1.00 | 0.11 | 0.67 | 1.00 | 0.07 | 0.78 | 1.00 | 0.05 | 0.86 | 1.00 | -0.79 | 0.00 | 0.02 |
| PRR5 | 0.05 | 0.78 | 1.00 | -0.16 | 0.47 | 1.00 | 0.04 | 0.84 | 1.00 | -0.16 | 0.48 | 1.00 | -0.28 | 0.22 | 1.00 | -0.70 | 0.00 | 0.02 |
| ZNF503 | 0.29 | 0.18 | 1.00 | -0.02 | 0.92 | 1.00 | 0.09 | 0.67 | 1.00 | -0.13 | 0.57 | 1.00 | -0.31 | 0.23 | 1.00 | -0.74 | 0.00 | 0.02 |
| VIT | -0.50 | 0.17 | 1.00 | -0.25 | 0.51 | 1.00 | -0.08 | 0.83 | 1.00 | -0.31 | 0.40 | 1.00 | -0.45 | 0.23 | 1.00 | -1.11 | 0.00 | 0.02 |
| P2RY1 | -0.22 | 0.28 | 1.00 | -0.06 | 0.77 | 1.00 | 0.01 | 0.96 | 1.00 | -0.09 | 0.66 | 1.00 | -0.29 | 0.18 | 1.00 | -0.64 | 0.00 | 0.02 |
| CTPS1 | -0.09 | 0.52 | 1.00 | 0.04 | 0.79 | 1.00 | 0.12 | 0.36 | 1.00 | 0.00 | 0.98 | 1.00 | -0.13 | 0.36 | 1.00 | -0.49 | 0.00 | 0.02 |
| NT5DC3 | 0.02 | 0.86 | 1.00 | -0.05 | 0.72 | 1.00 | 0.09 | 0.45 | 1.00 | -0.03 | 0.80 | 1.00 | -0.16 | 0.30 | 1.00 | -0.44 | 0.00 | 0.03 |
| KANK1 | 0.09 | 0.50 | 1.00 | 0.08 | 0.60 | 1.00 | 0.15 | 0.27 | 1.00 | 0.10 | 0.50 | 1.00 | 0.02 | 0.88 | 1.00 | -0.45 | 0.00 | 0.03 |
| COL25A1 | 0.27 | 0.23 | 1.00 | 0.16 | 0.50 | 1.00 | 0.21 | 0.34 | 1.00 | 0.19 | 0.39 | 1.00 | -0.21 | 0.39 | 1.00 | -0.69 | 0.00 | 0.03 |
| EFNB2 | 0.09 | 0.44 | 1.00 | 0.07 | 0.66 | 1.00 | 0.17 | 0.17 | 1.00 | 0.03 | 0.82 | 1.00 | 0.02 | 0.88 | 1.00 | -0.45 | 0.00 | 0.03 |
| DHX37 | 0.01 | 0.90 | 1.00 | 0.01 | 0.95 | 1.00 | 0.05 | 0.69 | 1.00 | 0.01 | 0.94 | 1.00 | -0.14 | 0.32 | 1.00 | -0.43 | 0.00 | 0.03 |
| NIP7 | -0.03 | 0.76 | 1.00 | 0.02 | 0.85 | 1.00 | 0.04 | 0.72 | 1.00 | 0.04 | 0.70 | 1.00 | -0.06 | 0.67 | 1.00 | -0.38 | 0.01 | 0.03 |
| RIN2 | 0.06 | 0.61 | 1.00 | 0.00 | 0.99 | 1.00 | 0.06 | 0.57 | 1.00 | 0.05 | 0.67 | 1.00 | -0.13 | 0.33 | 1.00 | -0.39 | 0.01 | 0.03 |
| MFSD12 | 0.05 | 0.61 | 1.00 | 0.01 | 0.94 | 1.00 | 0.02 | 0.85 | 1.00 | -0.01 | 0.93 | 1.00 | -0.19 | 0.21 | 1.00 | -0.42 | 0.01 | 0.03 |
| VPS9D1-AS1 | 0.31 | 0.54 | 1.00 | 0.00 | 0.99 | 1.00 | 0.15 | 0.76 | 1.00 | -0.26 | 0.37 | 1.00 | -0.72 | 0.25 | 1.00 | -0.84 | 0.01 | 0.03 |
| IL31RA | -0.12 | 0.74 | 1.00 | -0.03 | 0.94 | 1.00 | 0.00 | 0.99 | 1.00 | -0.07 | 0.83 | 1.00 | -0.23 | 0.52 | 1.00 | -1.03 | 0.01 | 0.03 |
| LZTS1 | 0.16 | 0.27 | 1.00 | 0.14 | 0.41 | 1.00 | 0.15 | 0.34 | 1.00 | 0.04 | 0.81 | 1.00 | -0.23 | 0.26 | 1.00 | -0.58 | 0.01 | 0.03 |
| DENND2A | -0.01 | 0.96 | 1.00 | -0.01 | 0.95 | 1.00 | 0.05 | 0.70 | 1.00 | 0.00 | 0.98 | 1.00 | -0.12 | 0.52 | 1.00 | -0.47 | 0.01 | 0.03 |
| MARCKS | 0.28 | 0.17 | 1.00 | 0.02 | 0.92 | 1.00 | 0.09 | 0.64 | 1.00 | -0.16 | 0.72 | 1.00 | -0.20 | 0.39 | 1.00 | -0.53 | 0.01 | 0.03 |
| NTM | 0.06 | 0.78 | 1.00 | 0.20 | 0.38 | 1.00 | 0.30 | 0.16 | 1.00 | -0.03 | 0.91 | 1.00 | -0.29 | 0.28 | 1.00 | -0.65 | 0.01 | 0.04 |
| ADCY3 | 0.03 | 0.76 | 1.00 | 0.02 | 0.85 | 1.00 | 0.09 | 0.43 | 1.00 | 0.04 | 0.76 | 1.00 | -0.21 | 0.19 | 1.00 | -0.40 | 0.01 | 0.04 |
| RRM2 | -0.03 | 0.78 | 1.00 | -0.03 | 0.86 | 1.00 | 0.07 | 0.59 | 1.00 | 0.00 | 1.00 | 1.00 | -0.13 | 0.33 | 1.00 | -0.42 | 0.01 | 0.04 |
| AMZ1 | -0.08 | 0.59 | 1.00 | 0.04 | 0.83 | 1.00 | 0.09 | 0.52 | 1.00 | -0.07 | 0.66 | 1.00 | -0.21 | 0.34 | 1.00 | -0.57 | 0.01 | 0.04 |
| RP11-314B1.2 | -0.24 | 0.55 | 1.00 | 0.26 | 0.54 | 1.00 | 0.49 | 0.21 | 1.00 | 0.13 | 0.78 | 1.00 | -0.07 | 0.85 | 1.00 | -1.19 | 0.01 | 0.04 |
| HERPUD1 | -0.01 | 0.92 | 1.00 | -0.03 | 0.79 | 1.00 | 0.01 | 0.94 | 1.00 | -0.03 | 0.80 | 1.00 | -0.15 | 0.25 | 1.00 | -0.38 | 0.01 | 0.04 |
| IL20RB | -0.10 | 0.49 | 1.00 | -0.08 | 0.59 | 1.00 | -0.07 | 0.58 | 1.00 | -0.13 | 0.38 | 1.00 | -0.18 | 0.23 | 1.00 | -0.39 | 0.01 | 0.04 |
| HAS2-AS1 | -1.76 | 0.13 | 1.00 | -2.05 | 0.09 | 1.00 | -0.77 | 0.46 | 1.00 | -1.00 | 0.32 | 1.00 | -1.16 | 0.29 | 1.00 | -3.64 | 0.01 | 0.04 |
| LTBP1 | -0.04 | 0.81 | 1.00 | 0.00 | 1.00 | 1.00 | 0.08 | 0.62 | 1.00 | -0.04 | 0.80 | 1.00 | -0.14 | 0.41 | 1.00 | -0.46 | 0.01 | 0.04 |
| SP4 | 0.05 | 0.70 | 1.00 | -0.01 | 0.96 | 1.00 | 0.02 | 0.90 | 1.00 | -0.07 | 0.69 | 1.00 | -0.09 | 0.57 | 1.00 | -0.39 | 0.01 | 0.04 |
| TUBA4A | 0.14 | 0.32 | 1.00 | 0.10 | 0.51 | 1.00 | 0.11 | 0.42 | 1.00 | 0.04 | 0.79 | 1.00 | -0.16 | 0.30 | 1.00 | -0.44 | 0.01 | 0.04 |
| MYOF | 0.06 | 0.59 | 1.00 | 0.02 | 0.92 | 1.00 | 0.13 | 0.28 | 1.00 | 0.01 | 0.92 | 1.00 | -0.17 | 0.34 | 1.00 | -0.46 | 0.01 | 0.04 |
| ADAM19 | 0.05 | 0.67 | 1.00 | 0.12 | 0.38 | 1.00 | 0.16 | 0.20 | 1.00 | 0.01 | 0.93 | 1.00 | -0.06 | 0.70 | 1.00 | -0.43 | 0.01 | 0.05 |
| ZBTB21 | 0.11 | 0.55 | 1.00 | -0.15 | 0.41 | 1.00 | -0.06 | 0.72 | 1.00 | -0.19 | 0.41 | 1.00 | -0.20 | 0.33 | 1.00 | -0.40 | 0.01 | 0.05 |
| FN1 | 0.30 | 0.11 | 1.00 | 0.02 | 0.91 | 1.00 | 0.20 | 0.25 | 1.00 | 0.01 | 0.97 | 1.00 | -0.28 | 0.22 | 1.00 | -0.51 | 0.01 | 0.05 |
| MICALCL | -0.17 | 0.57 | 1.00 | 0.02 | 0.94 | 1.00 | 0.05 | 0.86 | 1.00 | -0.13 | 0.71 | 1.00 | -0.21 | 0.49 | 1.00 | -0.79 | 0.01 | 0.05 |
| OVCH2 | 0.02 | 0.97 | 1.00 | -0.17 | 0.76 | 1.00 | -0.10 | 0.86 | 1.00 | -0.57 | 0.31 | 1.00 | -0.62 | 0.28 | 1.00 | -1.62 | 0.01 | 0.05 |
| MGLL | 0.12 | 0.35 | 1.00 | 0.13 | 0.39 | 1.00 | 0.18 | 0.17 | 1.00 | 0.09 | 0.48 | 1.00 | 0.00 | 1.00 | 1.00 | -0.50 | 0.00 | 0.02 |

Supplementary Table 2: A list of genes that were identified to exhibit complex biphasic responses using K-mean clustering for low dose rate exposures.

| symbol | log2FC.D1 | pval.D1 | padj.D1 | log2FC.D2 | pval.D2 | padj.D2 | log2FC.D3 | pval.D3 | padj.D3 | log2FC.D4 | pval.D4 | padj.D4 | log2FC.D5 | pval.D5 | padj.D5 | log2FC.D6 | pval.D6 | padj.D6 |
| --- | --- | --- | --- | --- | --- | --- | --- | --- | --- | --- | --- | --- | --- | --- | --- | --- | --- | --- |
| INHBB | -0.51 | 0.02 | 1.00 | -0.25 | 0.08 | 1.00 | -0.28 | 0.07 | 1.00 | -0.53 | 0.01 | 1.00 | -1.39 | 0.00 | 0.00 | -1.98 | 0.00 | 0.00 |
| HIST1H3I | -0.13 | 0.52 | 1.00 | 0.02 | 0.84 | 1.00 | 0.08 | 0.48 | 1.00 | -0.22 | 0.23 | 1.00 | -0.63 | 0.00 | 0.00 | -0.74 | 0.00 | 0.00 |
| HIST4H4 | -0.06 | 0.71 | 1.00 | 0.04 | 0.74 | 1.00 | 0.03 | 0.78 | 1.00 | -0.08 | 0.61 | 1.00 | -0.65 | 0.00 | 0.00 | -0.61 | 0.00 | 0.00 |
| CCDC80 | -0.30 | 0.21 | 1.00 | -0.05 | 0.67 | 1.00 | -0.05 | 0.63 | 1.00 | -0.31 | 0.14 | 1.00 | -0.85 | 0.00 | 0.00 | -1.25 | 0.00 | 0.00 |
| COL11A1 | -0.36 | 0.06 | 1.00 | -0.05 | 0.55 | 1.00 | -0.01 | 0.95 | 1.00 | -0.17 | 0.37 | 1.00 | -0.92 | 0.00 | 0.00 | -1.36 | 0.00 | 0.00 |
| HIST2H2BF | 0.02 | 0.94 | 1.00 | 0.13 | 0.38 | 1.00 | -0.03 | 0.74 | 1.00 | -0.06 | 0.70 | 1.00 | -0.62 | 0.00 | 0.00 | -0.51 | 0.01 | 0.03 |
| IGFBP3 | -0.22 | 0.15 | 1.00 | -0.17 | 0.07 | 1.00 | -0.29 | 0.00 | 0.16 | -0.38 | 0.01 | 1.00 | -0.87 | 0.00 | 0.00 | -1.54 | 0.00 | 0.00 |
| SLC2A1 | -0.23 | 0.21 | 1.00 | -0.15 | 0.14 | 1.00 | -0.14 | 0.13 | 1.00 | -0.20 | 0.22 | 1.00 | -0.57 | 0.00 | 0.00 | -0.88 | 0.00 | 0.00 |
| ANK2 | -0.01 | 0.93 | 1.00 | -0.01 | 0.92 | 1.00 | -0.05 | 0.65 | 1.00 | -0.24 | 0.14 | 1.00 | -0.52 | 0.00 | 0.01 | -0.51 | 0.00 | 0.00 |
| COL5A1 | -0.31 | 0.17 | 1.00 | -0.07 | 0.47 | 1.00 | 0.03 | 0.77 | 1.00 | -0.23 | 0.30 | 1.00 | -0.74 | 0.00 | 0.01 | -1.11 | 0.00 | 0.00 |
| COL1A2 | -0.20 | 0.29 | 1.00 | -0.13 | 0.22 | 1.00 | -0.07 | 0.46 | 1.00 | -0.29 | 0.11 | 1.00 | -0.78 | 0.00 | 0.01 | -1.11 | 0.00 | 0.00 |
| POSTN | -0.24 | 0.36 | 1.00 | 0.01 | 0.97 | 1.00 | 0.07 | 0.59 | 1.00 | -0.31 | 0.20 | 1.00 | -0.95 | 0.00 | 0.01 | -1.14 | 0.00 | 0.00 |
| LOXL1 | -0.17 | 0.34 | 1.00 | -0.20 | 0.08 | 1.00 | -0.15 | 0.13 | 1.00 | -0.29 | 0.10 | 1.00 | -0.54 | 0.00 | 0.01 | -0.73 | 0.00 | 0.00 |
| GDF6 | -0.24 | 0.16 | 1.00 | -0.19 | 0.08 | 1.00 | -0.18 | 0.07 | 1.00 | -0.21 | 0.20 | 1.00 | -0.74 | 0.00 | 0.02 | -1.41 | 0.00 | 0.00 |
| SLC22A3 | -0.04 | 0.86 | 1.00 | 0.00 | 0.98 | 1.00 | -0.10 | 0.57 | 1.00 | -0.32 | 0.12 | 1.00 | -0.78 | 0.00 | 0.02 | -1.21 | 0.00 | 0.00 |
| SREBF1 | -0.30 | 0.09 | 1.00 | -0.19 | 0.09 | 1.00 | -0.12 | 0.21 | 1.00 | -0.29 | 0.09 | 1.00 | -0.59 | 0.00 | 0.02 | -0.91 | 0.00 | 0.00 |
| ACTG1 | -0.25 | 0.30 | 1.00 | -0.11 | 0.34 | 1.00 | -0.08 | 0.41 | 1.00 | -0.24 | 0.20 | 1.00 | -0.54 | 0.00 | 0.02 | -0.81 | 0.00 | 0.00 |
| OLFML3 | -0.08 | 0.73 | 1.00 | -0.07 | 0.64 | 1.00 | -0.25 | 0.16 | 1.00 | -0.45 | 0.04 | 1.00 | -0.79 | 0.00 | 0.02 | -1.23 | 0.00 | 0.00 |
| FAM198B | -0.13 | 0.53 | 1.00 | 0.01 | 0.92 | 1.00 | 0.05 | 0.67 | 1.00 | -0.18 | 0.35 | 1.00 | -0.73 | 0.00 | 0.03 | -1.29 | 0.00 | 0.00 |
| PPFIA4 | -0.19 | 0.47 | 1.00 | -0.08 | 0.64 | 1.00 | 0.07 | 0.67 | 1.00 | -0.05 | 0.82 | 1.00 | -0.65 | 0.00 | 0.03 | -0.78 | 0.00 | 0.00 |
| MTHFD1L | -0.18 | 0.43 | 1.00 | -0.02 | 0.85 | 1.00 | 0.02 | 0.81 | 1.00 | -0.17 | 0.36 | 1.00 | -0.48 | 0.00 | 0.04 | -0.51 | 0.00 | 0.00 |
| FGFR2 | -0.11 | 0.61 | 1.00 | -0.06 | 0.63 | 1.00 | -0.02 | 0.89 | 1.00 | -0.19 | 0.33 | 1.00 | -0.62 | 0.00 | 0.04 | -0.80 | 0.00 | 0.00 |
| AK4 | -0.20 | 0.27 | 1.00 | 0.01 | 0.94 | 1.00 | -0.03 | 0.80 | 1.00 | -0.11 | 0.52 | 1.00 | -0.59 | 0.00 | 0.04 | -1.06 | 0.00 | 0.00 |
| HK2 | -0.28 | 0.26 | 1.00 | 0.20 | 0.16 | 1.00 | 0.28 | 0.04 | 0.96 | 0.21 | 0.39 | 1.00 | -0.60 | 0.00 | 0.05 | -1.19 | 0.00 | 0.00 |
| TGFBI | -0.09 | 0.62 | 1.00 | -0.10 | 0.30 | 1.00 | -0.09 | 0.29 | 1.00 | -0.19 | 0.23 | 1.00 | -0.40 | 0.00 | 0.05 | -0.53 | 0.00 | 0.00 |
| SEMA3E | -0.06 | 0.77 | 1.00 | 0.00 | 0.98 | 1.00 | -0.06 | 0.63 | 1.00 | -0.23 | 0.23 | 1.00 | -0.72 | 0.00 | 0.05 | -1.19 | 0.00 | 0.00 |
| ANKRD2 | -0.34 | 0.32 | 1.00 | -0.30 | 0.23 | 1.00 | -0.46 | 0.12 | 1.00 | -0.51 | 0.11 | 1.00 | -1.11 | 0.00 | 0.05 | -1.05 | 0.00 | 0.00 |
| MYH3 | -0.32 | 0.17 | 1.00 | -0.16 | 0.28 | 1.00 | -0.14 | 0.36 | 1.00 | -0.23 | 0.31 | 1.00 | -0.71 | 0.00 | 0.05 | -1.18 | 0.00 | 0.00 |
| SEMA5A | -0.28 | 0.23 | 1.00 | 0.01 | 0.95 | 1.00 | 0.02 | 0.91 | 1.00 | -0.34 | 0.12 | 1.00 | -0.91 | 0.00 | 0.05 | -2.15 | 0.00 | 0.00 |
| PLXDC2 | -0.10 | 0.61 | 1.00 | -0.06 | 0.70 | 1.00 | -0.13 | 0.40 | 1.00 | -0.20 | 0.33 | 1.00 | -0.55 | 0.00 | 0.05 | -0.59 | 0.00 | 0.01 |
| AP000892.6 | -0.64 | 0.01 | 1.00 | -0.23 | 0.30 | 1.00 | -0.20 | 0.13 | 1.00 | -0.52 | 0.02 | 1.00 | -0.73 | 0.00 | 0.05 | -1.54 | 0.00 | 0.00 |
| COL18A1 | -0.10 | 0.61 | 1.00 | -0.16 | 0.22 | 1.00 | -0.09 | 0.42 | 1.00 | -0.13 | 0.45 | 1.00 | -0.44 | 0.00 | 0.05 | -0.67 | 0.00 | 0.00 |
| TNC | -0.25 | 0.27 | 1.00 | -0.02 | 0.86 | 1.00 | 0.06 | 0.57 | 1.00 | -0.25 | 0.23 | 1.00 | -0.71 | 0.00 | 0.05 | -1.03 | 0.00 | 0.00 |
| CHRM3 | -0.10 | 0.66 | 1.00 | 0.07 | 0.66 | 1.00 | 0.08 | 0.66 | 1.00 | -0.06 | 0.78 | 1.00 | -0.71 | 0.00 | 0.05 | -1.10 | 0.00 | 0.00 |
| GJA5 | -0.31 | 0.12 | 1.00 | -0.24 | 0.11 | 1.00 | -0.38 | 0.02 | 0.57 | -0.40 | 0.03 | 1.00 | -0.82 | 0.00 | 0.05 | -1.65 | 0.00 | 0.00 |
| SAMD1 | -0.14 | 0.37 | 1.00 | -0.11 | 0.23 | 1.00 | -0.11 | 0.29 | 1.00 | -0.15 | 0.37 | 1.00 | -0.39 | 0.00 | 0.05 | -0.47 | 0.00 | 0.00 |
| TENM2 | -0.30 | 0.13 | 1.00 | -0.02 | 0.90 | 1.00 | 0.04 | 0.69 | 1.00 | -0.25 | 0.21 | 1.00 | -0.70 | 0.00 | 0.05 | -1.40 | 0.00 | 0.00 |
| CA12 | -0.21 | 0.25 | 1.00 | -0.19 | 0.13 | 1.00 | -0.15 | 0.22 | 1.00 | -0.25 | 0.15 | 1.00 | -0.59 | 0.00 | 0.05 | -0.82 | 0.00 | 0.00 |
| SIPA1L2 | 0.01 | 0.95 | 1.00 | 0.01 | 0.92 | 1.00 | 0.08 | 0.56 | 1.00 | -0.15 | 0.45 | 1.00 | -0.55 | 0.00 | 0.05 | -0.80 | 0.00 | 0.00 |
| AGRN | -0.08 | 0.69 | 1.00 | -0.10 | 0.47 | 1.00 | -0.01 | 0.95 | 1.00 | -0.05 | 0.81 | 1.00 | -0.39 | 0.00 | 0.06 | -0.46 | 0.00 | 0.00 |
| KIF26B | -0.31 | 0.22 | 1.00 | -0.19 | 0.35 | 1.00 | -0.25 | 0.24 | 1.00 | -0.37 | 0.15 | 1.00 | -0.72 | 0.00 | 0.06 | -1.23 | 0.00 | 0.00 |
| SCN9A | -0.06 | 0.72 | 1.00 | 0.08 | 0.46 | 1.00 | -0.01 | 0.92 | 1.00 | -0.19 | 0.20 | 1.00 | -0.50 | 0.00 | 0.06 | -0.91 | 0.00 | 0.00 |
| SLC1A4 | -0.14 | 0.47 | 1.00 | -0.09 | 0.36 | 1.00 | -0.09 | 0.34 | 1.00 | -0.29 | 0.09 | 1.00 | -0.48 | 0.00 | 0.06 | -0.22 | 0.06 | 0.20 |
| HIST1H1A | 0.02 | 0.91 | 1.00 | 0.10 | 0.43 | 1.00 | 0.07 | 0.55 | 1.00 | -0.03 | 0.85 | 1.00 | -0.43 | 0.00 | 0.06 | -0.38 | 0.01 | 0.03 |
| DPYSL3 | -0.19 | 0.34 | 1.00 | -0.07 | 0.43 | 1.00 | -0.03 | 0.69 | 1.00 | -0.24 | 0.17 | 1.00 | -0.43 | 0.00 | 0.06 | -0.60 | 0.00 | 0.00 |
| CRABP2 | -0.20 | 0.36 | 1.00 | -0.16 | 0.31 | 1.00 | -0.10 | 0.47 | 1.00 | -0.44 | 0.02 | 1.00 | -0.64 | 0.00 | 0.06 | -0.94 | 0.00 | 0.00 |
| VKORC1 | -0.20 | 0.30 | 1.00 | -0.07 | 0.56 | 1.00 | -0.09 | 0.42 | 1.00 | -0.24 | 0.16 | 1.00 | -0.44 | 0.00 | 0.07 | -0.36 | 0.01 | 0.04 |
| NPNT | -0.37 | 0.15 | 1.00 | -0.21 | 0.29 | 1.00 | -0.12 | 0.53 | 1.00 | -0.36 | 0.10 | 1.00 | -0.65 | 0.00 | 0.07 | -0.82 | 0.00 | 0.00 |
| HIST1H2BN | -0.16 | 0.34 | 1.00 | 0.02 | 0.90 | 1.00 | 0.01 | 0.90 | 1.00 | -0.11 | 0.50 | 1.00 | -0.45 | 0.00 | 0.07 | -0.42 | 0.00 | 0.01 |
| KRT8 | -0.14 | 0.51 | 1.00 | -0.08 | 0.53 | 1.00 | -0.09 | 0.38 | 1.00 | -0.14 | 0.44 | 1.00 | -0.40 | 0.00 | 0.07 | -0.60 | 0.00 | 0.00 |
| SCD | -0.25 | 0.15 | 1.00 | -0.06 | 0.65 | 1.00 | 0.00 | 0.99 | 1.00 | -0.11 | 0.54 | 1.00 | -0.56 | 0.00 | 0.09 | -1.34 | 0.00 | 0.00 |
| KCNH1 | -0.20 | 0.31 | 1.00 | -0.04 | 0.79 | 1.00 | -0.08 | 0.65 | 1.00 | -0.33 | 0.09 | 1.00 | -0.73 | 0.00 | 0.09 | -1.32 | 0.00 | 0.00 |
| PDK1 | -0.09 | 0.63 | 1.00 | 0.02 | 0.89 | 1.00 | 0.00 | 0.99 | 1.00 | -0.07 | 0.66 | 1.00 | -0.42 | 0.00 | 0.09 | -0.99 | 0.01 | 0.03 |
| ACTG2 | -0.36 | 0.08 | 1.00 | 0.05 | 0.78 | 1.00 | -0.05 | 0.73 | 1.00 | -0.31 | 0.15 | 1.00 | -0.68 | 0.00 | 0.10 | -1.19 | 0.00 | 0.00 |
| FLNA | -0.27 | 0.24 | 1.00 | -0.06 | 0.64 | 1.00 | 0.01 | 0.90 | 1.00 | -0.17 | 0.40 | 1.00 | -0.48 | 0.00 | 0.11 | -0.53 | 0.00 | 0.00 |
| ADAMTS2 | -0.02 | 0.91 | 1.00 | -0.04 | 0.77 | 1.00 | 0.03 | 0.84 | 1.00 | -0.04 | 0.82 | 1.00 | -0.45 | 0.00 | 0.11 | -0.70 | 0.00 | 0.00 |
| LSS | -0.28 | 0.27 | 1.00 | -0.15 | 0.22 | 1.00 | -0.04 | 0.72 | 1.00 | -0.20 | 0.34 | 1.00 | -0.41 | 0.00 | 0.12 | -0.44 | 0.00 | 0.00 |
| SLIT3 | -0.31 | 0.17 | 1.00 | 0.02 | 0.90 | 1.00 | 0.11 | 0.41 | 1.00 | -0.21 | 0.41 | 1.00 | -0.63 | 0.00 | 0.13 | -1.18 | 0.00 | 0.00 |
| FNTB | -0.33 | 0.14 | 1.00 | -0.16 | 0.37 | 1.00 | -0.18 | 0.19 | 1.00 | -0.38 | 0.06 | 1.00 | -0.47 | 0.00 | 0.13 | -0.50 | 0.00 | 0.00 |
| ENPP2 | -0.04 | 0.83 | 1.00 | -0.09 | 0.56 | 1.00 | -0.08 | 0.59 | 1.00 | -0.23 | 0.22 | 1.00 | -0.49 | 0.00 | 0.13 | -0.62 | 0.00 | 0.00 |
| LDHA | -0.15 | 0.45 | 1.00 | 0.06 | 0.69 | 1.00 | 0.13 | 0.27 | 1.00 | -0.09 | 0.67 | 1.00 | -0.49 | 0.01 | 0.13 | -0.76 | 0.00 | 0.00 |
| PRUNE2 | -0.36 | 0.10 | 1.00 | -0.05 | 0.83 | 1.00 | -0.05 | 0.79 | 1.00 | -0.29 | 0.21 | 1.00 | -0.65 | 0.01 | 0.13 | -1.32 | 0.00 | 0.00 |
| MXRA5 | -0.41 | 0.12 | 1.00 | 0.07 | 0.74 | 1.00 | 0.08 | 0.66 | 1.00 | -0.20 | 0.43 | 1.00 | -0.73 | 0.01 | 0.13 | -1.57 | 0.00 | 0.00 |
| COL4A2 | -0.20 | 0.30 | 1.00 | -0.07 | 0.54 | 1.00 | 0.01 | 0.92 | 1.00 | -0.09 | 0.64 | 1.00 | -0.43 | 0.01 | 0.13 | -0.51 | 0.00 | 0.00 |
| TMEM164 | -0.27 | 0.16 | 1.00 | -0.18 | 0.12 | 1.00 | -0.20 | 0.09 | 1.00 | -0.34 | 0.08 | 1.00 | -0.42 | 0.01 | 0.13 | -0.42 | 0.00 | 0.00 |
| COL4A1 | -0.12 | 0.49 | 1.00 | -0.06 | 0.64 | 1.00 | -0.02 | 0.86 | 1.00 | -0.04 | 0.81 | 1.00 | -0.41 | 0.01 | 0.14 | -0.50 | 0.00 | 0.00 |
| GPC1 | -0.06 | 0.75 | 1.00 | -0.14 | 0.33 | 1.00 | -0.09 | 0.46 | 1.00 | -0.13 | 0.48 | 1.00 | -0.36 | 0.01 | 0.15 | -0.41 | 0.00 | 0.01 |
| COLGALT1 | -0.21 | 0.31 | 1.00 | -0.05 | 0.59 | 1.00 | 0.00 | 0.96 | 1.00 | -0.11 | 0.56 | 1.00 | -0.33 | 0.01 | 0.15 | -0.48 | 0.00 | 0.00 |
| LDHAP4 | 0.12 | 0.60 | 1.00 | -0.01 | 0.96 | 1.00 | 0.09 | 0.54 | 1.00 | 0.02 | 0.90 | 1.00 | -0.50 | 0.01 | 0.16 | -0.73 | 0.00 | 0.00 |
| CD3EAP | -0.17 | 0.39 | 1.00 | -0.12 | 0.28 | 1.00 | -0.17 | 0.11 | 1.00 | -0.20 | 0.23 | 1.00 | -0.39 | 0.01 | 0.16 | -0.60 | 0.00 | 0.00 |
| SLC7A5 | -0.52 | 0.03 | 1.00 | -0.21 | 0.21 | 1.00 | -0.07 | 0.51 | 1.00 | -0.43 | 0.07 | 1.00 | -0.63 | 0.01 | 0.17 | -0.76 | 0.00 | 0.00 |
| UCK2 | -0.18 | 0.39 | 1.00 | -0.06 | 0.51 | 1.00 | 0.01 | 0.93 | 1.00 | -0.11 | 0.56 | 1.00 | -0.35 | 0.01 | 0.17 | -0.48 | 0.00 | 0.00 |
| CBX6 | -0.27 | 0.14 | 1.00 | -0.11 | 0.20 | 1.00 | -0.03 | 0.76 | 1.00 | -0.17 | 0.37 | 1.00 | -0.37 | 0.01 | 0.17 | -0.58 | 0.00 | 0.00 |
| CBLN2 | -0.01 | 0.98 | 1.00 | 0.09 | 0.64 | 1.00 | -0.10 | 0.62 | 1.00 | -0.30 | 0.21 | 1.00 | -0.67 | 0.01 | 0.17 | -1.13 | 0.00 | 0.00 |
| STEAP3 | -0.21 | 0.36 | 1.00 | -0.14 | 0.35 | 1.00 | -0.14 | 0.39 | 1.00 | -0.23 | 0.28 | 1.00 | -0.51 | 0.01 | 0.18 | -0.82 | 0.00 | 0.00 |
| FADS2 | -0.15 | 0.37 | 1.00 | -0.15 | 0.11 | 1.00 | -0.08 | 0.39 | 1.00 | -0.12 | 0.47 | 1.00 | -0.31 | 0.01 | 0.18 | -0.46 | 0.00 | 0.00 |
| CRISPLD2 | -0.25 | 0.18 | 1.00 | -0.03 | 0.71 | 1.00 | -0.04 | 0.64 | 1.00 | -0.13 | 0.43 | 1.00 | -0.52 | 0.01 | 0.18 | -1.03 | 0.00 | 0.00 |
| GSTA2 | -0.31 | 0.35 | 1.00 | -0.01 | 0.96 | 1.00 | -0.19 | 0.52 | 1.00 | -0.44 | 0.13 | 1.00 | -0.94 | 0.01 | 0.18 | -1.50 | 0.00 | 0.00 |
| HSPA5 | -0.18 | 0.72 | 1.00 | 0.17 | 0.32 | 1.00 | 0.37 | 0.18 | 1.00 | 0.12 | 0.66 | 1.00 | -0.43 | 0.01 | 0.18 | -0.69 | 0.00 | 0.00 |
| SCARB1 | -0.34 | 0.10 | 1.00 | -0.04 | 0.64 | 1.00 | 0.05 | 0.61 | 1.00 | -0.11 | 0.62 | 1.00 | -0.45 | 0.01 | 0.19 | -0.53 | 0.00 | 0.00 |
| ITGA11 | -0.38 | 0.14 | 1.00 | -0.14 | 0.56 | 1.00 | -0.06 | 0.70 | 1.00 | -0.45 | 0.07 | 1.00 | -0.58 | 0.01 | 0.19 | -1.05 | 0.00 | 0.00 |
| SPTBN2 | -0.25 | 0.28 | 1.00 | -0.21 | 0.19 | 1.00 | -0.14 | 0.33 | 1.00 | -0.15 | 0.46 | 1.00 | -0.41 | 0.01 | 0.19 | -0.62 | 0.00 | 0.00 |
| SH3BP5 | -0.04 | 0.83 | 1.00 | 0.06 | 0.61 | 1.00 | 0.06 | 0.62 | 1.00 | 0.01 | 0.94 | 1.00 | -0.38 | 0.01 | 0.20 | -0.54 | 0.00 | 0.00 |
| SLC16A9 | -0.06 | 0.84 | 1.00 | -0.38 | 0.13 | 1.00 | -0.37 | 0.19 | 1.00 | -0.38 | 0.20 | 1.00 | -0.71 | 0.01 | 0.21 | -0.75 | 0.01 | 0.05 |
| DENND2A | -0.20 | 0.37 | 1.00 | -0.09 | 0.52 | 1.00 | -0.05 | 0.71 | 1.00 | -0.22 | 0.27 | 1.00 | -0.47 | 0.01 | 0.23 | -0.85 | 0.00 | 0.00 |
| COL4A4 | -0.32 | 0.28 | 1.00 | -0.04 | 0.86 | 1.00 | -0.17 | 0.49 | 1.00 | -0.18 | 0.47 | 1.00 | -0.62 | 0.01 | 0.23 | -0.84 | 0.00 | 0.00 |
| LOXL2 | -0.19 | 0.41 | 1.00 | 0.16 | 0.10 | 1.00 | 0.26 | 0.07 | 1.00 | 0.15 | 0.50 | 1.00 | -0.32 | 0.01 | 0.23 | -0.82 | 0.00 | 0.00 |
| ROR2 | -0.23 | 0.43 | 1.00 | -0.26 | 0.29 | 1.00 | -0.15 | 0.56 | 1.00 | -0.41 | 0.12 | 1.00 | -0.64 | 0.01 | 0.23 | -0.66 | 0.01 | 0.03 |
| PDGFRB | -0.13 | 0.44 | 1.00 | -0.09 | 0.32 | 1.00 | -0.06 | 0.51 | 1.00 | -0.15 | 0.37 | 1.00 | -0.34 | 0.01 | 0.24 | -0.60 | 0.00 | 0.00 |
| FGFRL1 | -0.23 | 0.21 | 1.00 | -0.21 | 0.03 | 1.00 | -0.14 | 0.20 | 1.00 | -0.25 | 0.15 | 1.00 | -0.35 | 0.01 | 0.24 | -0.53 | 0.00 | 0.00 |
| LMCD1 | -0.03 | 0.88 | 1.00 | -0.07 | 0.47 | 1.00 | -0.05 | 0.61 | 1.00 | -0.12 | 0.53 | 1.00 | -0.34 | 0.01 | 0.24 | -0.51 | 0.00 | 0.00 |
| AMOT | -0.40 | 0.14 | 1.00 | 0.10 | 0.58 | 1.00 | 0.29 | 0.04 | 0.96 | -0.02 | 0.94 | 1.00 | -0.45 | 0.01 | 0.24 | -0.74 | 0.00 | 0.00 |
| FABP5 | -0.04 | 0.86 | 1.00 | 0.04 | 0.82 | 1.00 | 0.09 | 0.51 | 1.00 | -0.07 | 0.72 | 1.00 | -0.46 | 0.01 | 0.24 | -0.75 | 0.00 | 0.00 |
| GLI1 | -0.25 | 0.31 | 1.00 | -0.12 | 0.59 | 1.00 | -0.17 | 0.41 | 1.00 | -0.33 | 0.15 | 1.00 | -0.54 | 0.02 | 0.27 | -0.87 | 0.00 | 0.00 |
| CNN2 | -0.22 | 0.20 | 1.00 | -0.10 | 0.27 | 1.00 | -0.10 | 0.27 | 1.00 | -0.21 | 0.20 | 1.00 | -0.41 | 0.02 | 0.27 | -0.67 | 0.00 | 0.00 |
| PTRF | -0.17 | 0.27 | 1.00 | -0.12 | 0.14 | 1.00 | -0.10 | 0.28 | 1.00 | -0.14 | 0.38 | 1.00 | -0.34 | 0.02 | 0.27 | -0.49 | 0.00 | 0.00 |
| CD24 | 0.01 | 0.97 | 1.00 | 0.07 | 0.80 | 1.00 | -0.01 | 0.98 | 1.00 | -0.15 | 0.64 | 1.00 | -0.77 | 0.02 | 0.27 | -0.83 | 0.02 | 0.09 |
| ZNF395 | -0.12 | 0.50 | 1.00 | -0.14 | 0.20 | 1.00 | -0.05 | 0.58 | 1.00 | -0.11 | 0.49 | 1.00 | -0.34 | 0.02 | 0.28 | -0.55 | 0.00 | 0.00 |
| NRXN3 | -0.36 | 0.10 | 1.00 | 0.04 | 0.88 | 1.00 | 0.08 | 0.59 | 1.00 | -0.19 | 0.39 | 1.00 | -0.53 | 0.02 | 0.28 | -1.26 | 0.00 | 0.00 |
| RCL1 | 0.02 | 0.93 | 1.00 | 0.01 | 0.94 | 1.00 | 0.01 | 0.92 | 1.00 | -0.16 | 0.34 | 1.00 | -0.34 | 0.02 | 0.28 | -0.40 | 0.00 | 0.01 |
| MTHFD1 | -0.12 | 0.60 | 1.00 | 0.04 | 0.71 | 1.00 | 0.13 | 0.25 | 1.00 | -0.02 | 0.94 | 1.00 | -0.30 | 0.02 | 0.29 | -0.39 | 0.00 | 0.01 |
| HR | -0.28 | 0.24 | 1.00 | -0.20 | 0.22 | 1.00 | -0.02 | 0.91 | 1.00 | -0.08 | 0.70 | 1.00 | -0.43 | 0.02 | 0.29 | -0.67 | 0.00 | 0.00 |
| RRP12 | -0.25 | 0.23 | 1.00 | -0.10 | 0.36 | 1.00 | -0.03 | 0.77 | 1.00 | -0.15 | 0.41 | 1.00 | -0.37 | 0.02 | 0.30 | -0.48 | 0.00 | 0.00 |
| MYBBP1A | -0.41 | 0.04 | 1.00 | -0.13 | 0.26 | 1.00 | -0.05 | 0.61 | 1.00 | -0.14 | 0.48 | 1.00 | -0.46 | 0.02 | 0.30 | -0.58 | 0.00 | 0.00 |
| MYH10 | -0.17 | 0.42 | 1.00 | 0.09 | 0.47 | 1.00 | 0.13 | 0.18 | 1.00 | 0.00 | 1.00 | 1.00 | -0.36 | 0.02 | 0.31 | -0.44 | 0.00 | 0.00 |
| SPRYD3 | -0.09 | 0.69 | 1.00 | -0.15 | 0.21 | 1.00 | -0.12 | 0.38 | 1.00 | -0.25 | 0.20 | 1.00 | -0.31 | 0.02 | 0.31 | -0.52 | 0.00 | 0.00 |
| ALDH1B1 | -0.19 | 0.32 | 1.00 | -0.10 | 0.31 | 1.00 | -0.07 | 0.46 | 1.00 | -0.16 | 0.34 | 1.00 | -0.42 | 0.02 | 0.31 | -0.99 | 0.00 | 0.00 |
| CELSR1 | -0.19 | 0.46 | 1.00 | 0.04 | 0.73 | 1.00 | 0.18 | 0.12 | 1.00 | -0.09 | 0.69 | 1.00 | -0.37 | 0.02 | 0.32 | -0.57 | 0.00 | 0.00 |
| TUBA4A | -0.16 | 0.43 | 1.00 | -0.07 | 0.48 | 1.00 | -0.10 | 0.31 | 1.00 | -0.24 | 0.18 | 1.00 | -0.41 | 0.02 | 0.32 | -0.40 | 0.00 | 0.00 |
| BMP1 | -0.05 | 0.80 | 1.00 | -0.05 | 0.72 | 1.00 | 0.03 | 0.79 | 1.00 | 0.00 | 0.98 | 1.00 | -0.30 | 0.02 | 0.32 | -0.39 | 0.00 | 0.01 |
| CEMIP | -0.15 | 0.51 | 1.00 | 0.02 | 0.88 | 1.00 | -0.01 | 0.92 | 1.00 | -0.12 | 0.59 | 1.00 | -0.52 | 0.02 | 0.32 | -1.19 | 0.00 | 0.00 |
| MYO18B | -0.19 | 0.43 | 1.00 | -0.23 | 0.29 | 1.00 | -0.01 | 0.95 | 1.00 | -0.15 | 0.52 | 1.00 | -0.52 | 0.02 | 0.32 | -0.87 | 0.00 | 0.00 |
| MEST | -0.12 | 0.49 | 1.00 | -0.11 | 0.29 | 1.00 | -0.09 | 0.31 | 1.00 | -0.24 | 0.13 | 1.00 | -0.44 | 0.02 | 0.36 | -0.70 | 0.00 | 0.00 |
| RNF150 | -0.12 | 0.51 | 1.00 | 0.00 | 0.99 | 1.00 | 0.00 | 0.99 | 1.00 | -0.25 | 0.17 | 1.00 | -0.40 | 0.03 | 0.36 | -0.99 | 0.00 | 0.00 |
| FZD1 | -0.33 | 0.09 | 1.00 | -0.20 | 0.15 | 1.00 | -0.13 | 0.31 | 1.00 | -0.24 | 0.20 | 1.00 | -0.37 | 0.03 | 0.36 | -0.45 | 0.00 | 0.01 |
| POU6F1 | -0.37 | 0.11 | 1.00 | -0.09 | 0.64 | 1.00 | -0.12 | 0.48 | 1.00 | -0.34 | 0.14 | 1.00 | -0.42 | 0.03 | 0.37 | -0.41 | 0.01 | 0.03 |
| CEBPD | 0.02 | 0.91 | 1.00 | -0.14 | 0.39 | 1.00 | 0.04 | 0.75 | 1.00 | -0.19 | 0.34 | 1.00 | -0.40 | 0.03 | 0.39 | -0.62 | 0.00 | 0.00 |
| GPI | -0.28 | 0.18 | 1.00 | -0.09 | 0.44 | 1.00 | 0.02 | 0.87 | 1.00 | -0.21 | 0.32 | 1.00 | -0.46 | 0.03 | 0.39 | -0.46 | 0.00 | 0.00 |
| TFAP4 | -0.26 | 0.25 | 1.00 | -0.06 | 0.68 | 1.00 | -0.07 | 0.61 | 1.00 | -0.10 | 0.64 | 1.00 | -0.42 | 0.03 | 0.40 | -0.55 | 0.00 | 0.00 |
| SLC19A1 | -0.19 | 0.38 | 1.00 | -0.02 | 0.83 | 1.00 | 0.04 | 0.75 | 1.00 | 0.01 | 0.95 | 1.00 | -0.31 | 0.03 | 0.40 | -0.48 | 0.00 | 0.00 |
| RRS1 | -0.24 | 0.23 | 1.00 | 0.11 | 0.36 | 1.00 | 0.18 | 0.20 | 1.00 | 0.06 | 0.79 | 1.00 | -0.39 | 0.03 | 0.41 | -0.48 | 0.00 | 0.01 |
| RNF122 | -0.52 | 0.19 | 1.00 | -0.36 | 0.24 | 1.00 | -0.44 | 0.21 | 1.00 | -0.69 | 0.05 | 1.00 | -0.74 | 0.03 | 0.41 | -0.83 | 0.01 | 0.06 |
| RFX3 | 0.18 | 0.43 | 1.00 | 0.40 | 0.01 | 1.00 | 0.43 | 0.00 | 0.14 | 0.33 | 0.08 | 1.00 | 0.31 | 0.03 | 0.41 | 0.19 | 0.19 | 0.53 |
| TIMP3 | -0.36 | 0.04 | 1.00 | -0.11 | 0.37 | 1.00 | -0.11 | 0.25 | 1.00 | -0.19 | 0.25 | 1.00 | -0.42 | 0.03 | 0.42 | -1.02 | 0.00 | 0.00 |
| SEMA3D | -0.06 | 0.75 | 1.00 | 0.05 | 0.74 | 1.00 | 0.07 | 0.49 | 1.00 | -0.12 | 0.51 | 1.00 | -0.43 | 0.03 | 0.42 | -0.94 | 0.00 | 0.00 |
| SULF1 | -0.02 | 0.87 | 1.00 | 0.02 | 0.85 | 1.00 | -0.06 | 0.54 | 1.00 | -0.14 | 0.39 | 1.00 | -0.42 | 0.03 | 0.42 | -0.82 | 0.00 | 0.00 |
| RBM14 | -0.32 | 0.11 | 1.00 | -0.05 | 0.70 | 1.00 | 0.00 | 0.96 | 1.00 | -0.19 | 0.34 | 1.00 | -0.37 | 0.03 | 0.42 | -0.41 | 0.00 | 0.00 |
| PRR5 | -0.38 | 0.17 | 1.00 | -0.17 | 0.35 | 1.00 | -0.12 | 0.55 | 1.00 | -0.31 | 0.22 | 1.00 | -0.46 | 0.04 | 0.45 | -1.04 | 0.00 | 0.00 |
| DHRS3 | 0.01 | 0.96 | 1.00 | -0.14 | 0.18 | 1.00 | -0.10 | 0.30 | 1.00 | -0.18 | 0.25 | 1.00 | -0.28 | 0.04 | 0.45 | -0.57 | 0.00 | 0.00 |
| GALNT2 | -0.16 | 0.50 | 1.00 | 0.02 | 0.86 | 1.00 | 0.12 | 0.30 | 1.00 | -0.02 | 0.92 | 1.00 | -0.30 | 0.04 | 0.45 | -0.40 | 0.00 | 0.01 |
| MFAP5 | -0.06 | 0.82 | 1.00 | -0.01 | 0.94 | 1.00 | -0.11 | 0.61 | 1.00 | -0.25 | 0.29 | 1.00 | -0.46 | 0.04 | 0.46 | -0.58 | 0.02 | 0.07 |
| PYROXD1 | -0.12 | 0.55 | 1.00 | 0.11 | 0.53 | 1.00 | 0.07 | 0.65 | 1.00 | -0.12 | 0.54 | 1.00 | -0.42 | 0.04 | 0.46 | -0.13 | 0.43 | 0.89 |
| COL8A1 | -0.06 | 0.72 | 1.00 | -0.03 | 0.76 | 1.00 | -0.04 | 0.68 | 1.00 | -0.06 | 0.68 | 1.00 | -0.39 | 0.04 | 0.46 | -0.86 | 0.00 | 0.00 |
| LRIG1 | -0.10 | 0.59 | 1.00 | -0.05 | 0.64 | 1.00 | 0.04 | 0.66 | 1.00 | -0.06 | 0.69 | 1.00 | -0.27 | 0.04 | 0.46 | -0.48 | 0.00 | 0.00 |
| GABRQ | -0.24 | 0.39 | 1.00 | 0.05 | 0.83 | 1.00 | -0.07 | 0.75 | 1.00 | -0.18 | 0.48 | 1.00 | -0.54 | 0.04 | 0.46 | -0.94 | 0.00 | 0.00 |
| EDIL3 | -0.12 | 0.58 | 1.00 | 0.00 | 0.99 | 1.00 | 0.06 | 0.65 | 1.00 | -0.14 | 0.46 | 1.00 | -0.41 | 0.04 | 0.46 | -0.87 | 0.01 | 0.04 |
| COL14A1 | -0.11 | 0.75 | 1.00 | 0.00 | 0.99 | 1.00 | -0.18 | 0.56 | 1.00 | -0.34 | 0.26 | 1.00 | -0.68 | 0.04 | 0.48 | -1.30 | 0.00 | 0.00 |
| GEMIN4 | -0.15 | 0.55 | 1.00 | -0.03 | 0.79 | 1.00 | 0.07 | 0.47 | 1.00 | -0.15 | 0.46 | 1.00 | -0.28 | 0.04 | 0.48 | -0.45 | 0.00 | 0.00 |
| ACTC1 | -0.30 | 0.10 | 1.00 | -0.07 | 0.43 | 1.00 | -0.09 | 0.41 | 1.00 | -0.24 | 0.18 | 1.00 | -0.46 | 0.04 | 0.50 | -1.17 | 0.00 | 0.00 |
| GTDC1 | 0.12 | 0.53 | 1.00 | 0.01 | 0.92 | 1.00 | 0.03 | 0.79 | 1.00 | -0.04 | 0.82 | 1.00 | -0.33 | 0.04 | 0.50 | -0.51 | 0.00 | 0.01 |
| MAB21L1 | -0.23 | 0.36 | 1.00 | -0.07 | 0.68 | 1.00 | 0.01 | 0.94 | 1.00 | -0.32 | 0.19 | 1.00 | -0.42 | 0.04 | 0.50 | -0.56 | 0.00 | 0.00 |
| NEK6 | -0.20 | 0.30 | 1.00 | 0.03 | 0.74 | 1.00 | 0.12 | 0.30 | 1.00 | 0.00 | 0.99 | 1.00 | -0.26 | 0.04 | 0.50 | -0.58 | 0.00 | 0.00 |
| FAM46A | -0.14 | 0.45 | 1.00 | 0.03 | 0.83 | 1.00 | 0.08 | 0.49 | 1.00 | -0.02 | 0.91 | 1.00 | -0.31 | 0.04 | 0.50 | -0.56 | 0.00 | 0.01 |
| RP11-127B20.2 | 0.67 | 0.23 | 1.00 | 1.05 | 0.04 | 1.00 | 1.15 | 0.03 | 0.88 | 1.12 | 0.02 | 1.00 | 0.96 | 0.04 | 0.50 | 0.07 | 0.90 | 1.00 |
| ACTN1 | -0.30 | 0.22 | 1.00 | -0.03 | 0.75 | 1.00 | 0.09 | 0.41 | 1.00 | -0.21 | 0.39 | 1.00 | -0.51 | 0.05 | 0.51 | -0.59 | 0.00 | 0.00 |
| GPR153 | -0.33 | 0.12 | 1.00 | -0.16 | 0.31 | 1.00 | -0.09 | 0.58 | 1.00 | -0.21 | 0.35 | 1.00 | -0.38 | 0.05 | 0.51 | -0.56 | 0.00 | 0.00 |
| MAGED1 | -0.24 | 0.26 | 1.00 | -0.03 | 0.85 | 1.00 | 0.03 | 0.81 | 1.00 | -0.18 | 0.40 | 1.00 | -0.38 | 0.05 | 0.51 | -0.68 | 0.00 | 0.00 |
| RPS27AP2 | -1.59 | 0.23 | 1.00 | -0.21 | 0.81 | 1.00 | -1.32 | 0.27 | 1.00 | -1.49 | 0.18 | 1.00 | -2.49 | 0.05 | 0.52 | -2.37 | 0.06 | 0.20 |
| RARRES2 | 0.30 | 0.21 | 1.00 | -0.24 | 0.21 | 1.00 | -0.21 | 0.31 | 1.00 | -0.21 | 0.37 | 1.00 | -0.53 | 0.05 | 0.52 | -0.82 | 0.00 | 0.00 |
| TNS3 | -0.20 | 0.31 | 1.00 | -0.02 | 0.85 | 1.00 | 0.06 | 0.51 | 1.00 | -0.13 | 0.51 | 1.00 | -0.36 | 0.05 | 0.52 | -0.54 | 0.00 | 0.00 |
| PWAR6 | -0.08 | 0.75 | 1.00 | 0.37 | 0.06 | 1.00 | 0.49 | 0.00 | 0.14 | 0.35 | 0.07 | 1.00 | 0.32 | 0.05 | 0.52 | 0.01 | 0.93 | 1.00 |
| PCOLCE | -0.28 | 0.32 | 1.00 | -0.06 | 0.75 | 1.00 | 0.01 | 0.93 | 1.00 | -0.26 | 0.32 | 1.00 | -0.51 | 0.05 | 0.52 | -0.68 | 0.00 | 0.00 |

Supplementary Table 3: A list of genes and associated BMD median outputs for high dose rate exposures.

| Probe Id | BMDS Model | Gene Symbols | BMD (Gy) | Fit P-value | AIC |
| --- | --- | --- | --- | --- | --- |
| ENSG00000238825 | Hill |  | 0.0 | 0.2 | -73.9 |
| ENSG00000237133 | Hill |  | 0.0 | 0.4 | -198.8 |
| ENSG00000276712 | Hill | mir7111 | 0.0 | 0.1 | -100.7 |
| ENSG00000281404 | Hill | linc01176 | 0.0 | 0.0 | -102.2 |
| ENSG00000207344 | Hill |  | 0.0 | 0.0 | -66.0 |
| ENSG00000207008 | Hill | snora54 | 0.0 | 0.1 | 103.4 |
| ENSG00000279491 | Hill | rp11-810p12.7 | 0.0 | 0.0 | -124.4 |
| ENSG00000234268 | Hill |  | 0.0 | 0.0 | -182.5 |
| ENSG00000223341 | Hill |  | 0.0 | 0.0 | -149.2 |
| ENSG00000200354 | Hill | snora71d | 0.0 | 0.0 | 56.2 |
| ENSG00000166546 | Exp 4 | bean1 | 0.0 | 0.6 | -160.5 |
| ENSG00000255581 | Exp 4 |  | 0.0 | 0.1 | -167.0 |
| ENSG00000269425 | Hill |  | 0.0 | 0.3 | -190.9 |
| ENSG00000258824 | Exp 4 |  | 0.0 | 0.6 | -86.1 |
| ENSG00000200855 | Exp 4 |  | 0.1 | 0.0 | -185.2 |
| ENSG00000279114 | Exp 4 |  | 0.2 | 0.0 | -191.2 |
| ENSG00000260604 | Poly 2 |  | 0.2 | 0.9 | -3.9 |
| ENSG00000260244 | Poly 3 |  | 0.3 | 0.1 | -73.4 |
| ENSG00000109321 | Linear | areg | 0.3 | 0.3 | -24.7 |
| ENSG00000235180 | Hill | linc00601 | 0.3 | 0.4 | -165.8 |
| ENSG00000281044 | Poly 3 |  | 0.3 | 0.2 | -182.2 |
| ENSG00000071242 | Exp 4 | rps6ka2 | 0.3 | 0.6 | -52.0 |
| ENSG00000167772 | Poly 2 | angptl4 | 0.3 | 0.8 | 66.5 |
| ENSG00000104689 | Exp 4 | tnfrsf10a | 0.4 | 0.2 | -9.2 |
| ENSG00000138798 | Poly 2 | egf | 0.4 | 0.3 | 124.5 |
| ENSG00000138166 | Poly 2 | dusp5 | 0.4 | 0.8 | 56.0 |
| ENSG00000271614 | Poly 2 | atp2b1-as1 | 0.4 | 0.2 | -42.2 |
| ENSG00000179242 | Exp 5 | cdh4 | 0.4 | 0.4 | -65.8 |
| ENSG00000160712 | Poly 2 | il6r | 0.5 | 0.5 | -13.5 |
| ENSG00000124762 | Poly 2 | cdkn1a | 0.5 | 0.8 | 162.3 |
| ENSG00000137462 | Exp 4 | tlr2 | 0.5 | 0.0 | -110.4 |
| ENSG00000185860 | Poly 2 | ccdc190 | 0.5 | 0.8 | 16.5 |
| ENSG00000176907 | Poly 2 | c8orf4 | 0.5 | 1.0 | 49.4 |
| ENSG00000153233 | Poly 2 | ptprr | 0.5 | 0.7 | 11.9 |
| ENSG00000138271 | Linear | gpr87 | 0.5 | 0.7 | -101.7 |
| ENSG00000169271 | Poly 2 | hspb3 | 0.5 | 0.3 | -55.9 |
| ENSG00000168298 | Poly 2 | hist1h1e | 0.5 | 0.3 | 319.1 |
| ENSG00000265399 | Poly 2 |  | 0.5 | 0.0 | -162.5 |
| ENSG00000143217 | Linear | nectin4 | 0.5 | 0.4 | -24.9 |
| ENSG00000125384 | Poly 3 | ptger2 | 0.5 | 0.6 | -19.4 |
| ENSG00000185664 | Exp 5 | pmel | 0.5 | 0.6 | -41.7 |
| ENSG00000118557 | Exp 5 | pmfbp1 | 0.5 | 0.1 | -107.2 |
| ENSG00000002079 | Exp 4 |  | 0.5 | 0.0 | -169.3 |
| ENSG00000084764 | Poly 3 | mapre3 | 0.5 | 0.0 | -31.8 |
| ENSG00000168334 | Exp 4 | xirp1 | 0.5 | 0.8 | -44.9 |
| ENSG00000257557 | Poly 2 |  | 0.5 | 0.4 | -57.0 |
| ENSG00000162630 | Poly 2 | b3galt2 | 0.5 | 0.9 | -84.6 |
| ENSG00000124610 | Exp 4 | hist1h1a | 0.5 | 0.6 | 133.6 |
| ENSG00000244468 | Poly 2 |  | 0.6 | 0.1 | -195.4 |
| ENSG00000143473 | Exp 4 | kcnh1 | 0.6 | 0.3 | 48.9 |
| ENSG00000233822 | Exp 4 | hist1h2bn | 0.6 | 0.7 | 197.5 |
| ENSG00000117525 | Poly 2 | f3 | 0.6 | 1.0 | 160.5 |
| ENSG00000152611 | Poly 2 | capsl | 0.6 | 0.9 | -78.3 |
| ENSG00000138378 | Exp 4 | stat4 | 0.6 | 1.0 | -85.6 |
| ENSG00000205325 | Poly 2 |  | 0.6 | 0.8 | -52.4 |
| ENSG00000174007 | Exp 4 | cep19 | 0.6 | 0.7 | 22.6 |
| ENSG00000167371 | Poly 3 | prrt2 | 0.6 | 0.7 | -113.3 |
| ENSG00000184307 | Poly 2 | zdhhc23 | 0.6 | 0.3 | -57.9 |
| ENSG00000166923 | Poly 2 | grem1 | 0.6 | 1.0 | 294.4 |
| ENSG00000198842 | Poly 2 | dusp27 | 0.6 | 0.3 | -17.3 |
| ENSG00000168427 | Exp 4 | klhl30 | 0.6 | 0.2 | -86.2 |
| ENSG00000279598 | Poly 3 |  | 0.6 | 0.1 | -62.7 |
| ENSG00000072571 | Linear | hmmr | 0.6 | 0.1 | 273.5 |
| ENSG00000184357 | Poly 2 | hist1h1b | 0.6 | 0.1 | 343.0 |
| ENSG00000150394 | Poly 2 | cdh8 | 0.6 | 0.4 | -121.8 |
| ENSG00000169429 | Poly 2 | cxcl8 | 0.6 | 0.8 | 100.0 |
| ENSG00000205464 | Poly 2 | atp6ap1l | 0.6 | 0.4 | -62.8 |
| ENSG00000280022 | Poly 2 |  | 0.6 | 0.5 | -145.5 |
| ENSG00000137124 | Poly 3 | aldh1b1 | 0.6 | 1.0 | 228.7 |
| ENSG00000279237 | Poly 3 |  | 0.6 | 0.9 | -133.5 |
| ENSG00000184270 | Poly 2 | hist2h2ab | 0.6 | 0.3 | 165.6 |
| ENSG00000135679 | Exp 2 | mdm2 | 0.6 | 0.9 | 238.9 |
| ENSG00000198919 | Linear | dzip3 | 0.6 | 0.2 | 183.8 |
| ENSG00000148677 | Poly 2 | ankrd1 | 0.7 | 0.8 | 336.3 |
| ENSG00000275379 | Exp 4 | hist1h3i | 0.7 | 1.0 | 244.9 |
| ENSG00000237181 | Poly 2 |  | 0.7 | 0.6 | -84.2 |
| ENSG00000142623 | Poly 2 | padi1 | 0.7 | 0.3 | -98.0 |
| ENSG00000177406 | Hill | rp11-218m22.1 | 0.7 | 0.2 | 2.2 |
| ENSG00000240476 | Poly 2 |  | 0.7 | 0.9 | -60.0 |
| ENSG00000139318 | Poly 2 | dusp6 | 0.7 | 0.2 | 60.9 |
| ENSG00000259712 | Poly 2 |  | 0.7 | 1.0 | -132.6 |
| ENSG00000274267 | Poly 2 | hist1h3b | 0.7 | 0.5 | 331.6 |
| ENSG00000125538 | Poly 2 | il1b | 0.7 | 0.9 | -39.6 |
| ENSG00000257732 | Poly 2 |  | 0.7 | 0.8 | -1.9 |
| ENSG00000277075 | Poly 2 | hist1h2ae | 0.7 | 0.3 | 255.1 |
| ENSG00000163599 | Poly 2 | ctla4 | 0.7 | 0.1 | -154.1 |
| ENSG00000203814 | Exp 4 | hist2h2bf | 0.7 | 0.6 | 219.2 |
| ENSG00000276180 | Exp 4 | hist1h4i | 0.7 | 0.9 | -24.0 |
| ENSG00000173227 | Poly 2 | syt12 | 0.7 | 0.9 | 33.7 |
| ENSG00000128594 | Poly 2 | lrrc4 | 0.7 | 0.1 | -51.0 |
| ENSG00000223396 | Poly 2 |  | 0.7 | 0.0 | -117.8 |
| ENSG00000170540 | Linear | arl6ip1 | 0.7 | 0.4 | 318.9 |
| ENSG00000180596 | Poly 2 | hist1h2bc | 0.7 | 0.1 | 248.8 |
| ENSG00000178878 | Linear | apold1 | 0.7 | 0.9 | 95.2 |
| ENSG00000147573 | Poly 2 | trim55 | 0.7 | 0.8 | 31.4 |
| ENSG00000167107 | Linear | acsf2 | 0.7 | 0.9 | 124.0 |
| ENSG00000132274 | Linear | trim22 | 0.7 | 0.1 | -9.5 |
| ENSG00000048392 | Linear | rrm2b | 0.7 | 0.6 | 183.6 |
| ENSG00000130477 | Linear | unc13a | 0.8 | 0.2 | -139.8 |
| ENSG00000276903 | Poly 2 | hist1h2al | 0.8 | 0.4 | 179.0 |
| ENSG00000024526 | Linear | depdc1 | 0.8 | 0.5 | 262.5 |
| ENSG00000182013 | Poly 2 | pnmal1 | 0.8 | 0.7 | -85.6 |
| ENSG00000173641 | Poly 2 | hspb7 | 0.8 | 0.1 | -101.1 |
| ENSG00000164938 | Exp 2 | tp53inp1 | 0.8 | 0.5 | 127.6 |
| ENSG00000100526 | Linear | cdkn3 | 0.8 | 0.7 | 170.8 |
| ENSG00000167642 | Exp 4 | spint2 | 0.8 | 0.6 | 26.9 |
| ENSG00000256268 | Poly 2 |  | 0.8 | 0.6 | -61.2 |
| ENSG00000118193 | Linear | kif14 | 0.8 | 0.9 | 242.1 |
| ENSG00000274641 | Poly 2 | hist1h2bo | 0.8 | 0.3 | 248.6 |
| ENSG00000141376 | Exp 2 | bcas3 | 0.8 | 0.4 | 66.6 |
| ENSG00000274213 | Poly 2 |  | 0.8 | 0.9 | -104.7 |
| ENSG00000158373 | Poly 2 | hist1h2bd | 0.8 | 0.2 | 311.1 |
| ENSG00000182050 | Poly 2 | mgat4c | 0.8 | 0.1 | -178.6 |
| ENSG00000197903 | Poly 2 | hist1h2bk | 0.8 | 0.8 | 275.9 |
| ENSG00000197291 | Poly 2 | ramp2-as1 | 0.8 | 0.9 | -87.2 |
| ENSG00000185130 | Poly 2 | hist1h2bl | 0.8 | 0.6 | 190.8 |
| ENSG00000153029 | Linear | mr1 | 0.8 | 0.6 | 108.8 |
| ENSG00000166592 | Linear | rrad | 0.8 | 1.0 | -17.2 |
| ENSG00000205592 | Linear |  | 0.8 | 0.0 | -212.2 |
| ENSG00000275714 | Poly 2 | hist1h3a | 0.8 | 0.5 | 170.2 |
| ENSG00000055163 | Exp 2 | cyfip2 | 0.8 | 0.7 | -18.1 |
| ENSG00000254777 | Poly 2 |  | 0.8 | 0.4 | -151.6 |
| ENSG00000115155 | Linear | otof | 0.9 | 0.8 | -94.1 |
| ENSG00000130513 | Exp 2 | gdf15 | 0.9 | 0.7 | 8.6 |
| ENSG00000249961 | Poly 2 | terb1 | 0.9 | 0.2 | -178.9 |
| ENSG00000169252 | Poly 2 | adrb2 | 0.9 | 0.1 | -7.7 |
| ENSG00000183287 | Linear | ccbe1 | 0.9 | 1.0 | 173.3 |
| ENSG00000137975 | Linear | clca2 | 0.9 | 0.7 | -74.4 |
| ENSG00000258957 | Poly 2 |  | 0.9 | 0.8 | -128.8 |
| ENSG00000113657 | Poly 2 | dpysl3 | 0.9 | 0.9 | 197.4 |
| ENSG00000117650 | Linear | nek2 | 0.9 | 0.6 | 209.5 |
| ENSG00000130517 | Linear | pgpep1 | 0.9 | 0.3 | 41.9 |
| ENSG00000216895 | Poly 2 | ac009403.2 | 0.9 | 0.2 | -80.8 |
| ENSG00000147202 | Exp 4 | diaph2 | 0.9 | 0.3 | 80.0 |
| ENSG00000130766 | Poly 2 | sesn2 | 0.9 | 0.6 | 124.6 |
| ENSG00000243797 | Poly 2 |  | 0.9 | 0.1 | -176.3 |
| ENSG00000169760 | Linear | nlgn1 | 0.9 | 0.9 | 63.2 |
| ENSG00000079156 | Exp 4 | osbpl6 | 0.9 | 0.9 | 97.0 |
| ENSG00000135423 | Exp 2 | gls2 | 0.9 | 0.1 | -75.6 |
| ENSG00000112984 | Linear | kif20a | 0.9 | 0.7 | 293.6 |
| ENSG00000132563 | Linear | reep2 | 0.9 | 0.9 | 135.7 |
| ENSG00000170153 | Exp 4 | rnf150 | 0.9 | 0.9 | 92.7 |
| ENSG00000197061 | Exp 4 | hist1h4c | 0.9 | 0.5 | 331.7 |
| ENSG00000196747 | Exp 2 | hist1h2ai | 0.9 | 0.1 | 258.4 |
| ENSG00000128050 | Exp 4 | paics | 0.9 | 0.8 | 330.6 |
| ENSG00000119397 | Linear | cntrl | 0.9 | 0.9 | 149.6 |
| ENSG00000278238 | Linear |  | 0.9 | 0.3 | -48.3 |
| ENSG00000157456 | Exp 2 | ccnb2 | 0.9 | 0.4 | 273.1 |
| ENSG00000225760 | Poly 2 |  | 0.9 | 0.6 | -118.9 |
| ENSG00000214274 | Poly 2 | ang | 0.9 | 0.6 | -103.4 |
| ENSG00000099194 | Exp 2 | scd | 0.9 | 1.0 | 224.4 |
| ENSG00000154678 | Exp 2 | pde1c | 0.9 | 0.9 | 195.7 |
| ENSG00000162849 | Poly 2 | kif26b | 0.9 | 0.6 | -27.6 |
| ENSG00000176244 | Linear | acbd7 | 0.9 | 0.7 | 43.2 |
| ENSG00000184260 | Exp 2 | hist2h2ac | 0.9 | 0.0 | 243.0 |
| ENSG00000026103 | Exp 2 | fas | 0.9 | 0.9 | -10.7 |
| ENSG00000276966 | Exp 4 | hist1h4e | 0.9 | 0.1 | 310.5 |
| ENSG00000230082 | Hill | prrt3-as1 | 1.0 | 0.9 | -65.4 |
| ENSG00000224459 | Poly 2 |  | 1.0 | 0.7 | -86.9 |
| ENSG00000164687 | Poly 2 | fabp5 | 1.0 | 0.7 | 66.2 |
| ENSG00000144452 | Linear | abca12 | 1.0 | 0.2 | -150.0 |
| ENSG00000273802 | Exp 2 | hist1h2bg | 1.0 | 0.3 | 289.9 |
| ENSG00000139354 | Linear | gas2l3 | 1.0 | 0.5 | 205.2 |
| ENSG00000115556 | Linear | plcd4 | 1.0 | 0.8 | -62.5 |
| ENSG00000204386 | Linear | neu1 | 1.0 | 0.7 | 165.9 |
| ENSG00000163683 | Linear | smim14 | 1.0 | 0.5 | 131.3 |
| ENSG00000073331 | Exp 2 | alpk1 | 1.0 | 0.8 | 136.9 |
| ENSG00000134775 | Exp 2 | fhod3 | 1.0 | 0.5 | 55.6 |
| ENSG00000155846 | Exp 4 | ppargc1b | 1.0 | 0.8 | 25.8 |
| ENSG00000099250 | Exp 2 | nrp1 | 1.0 | 0.1 | 156.7 |
| ENSG00000175746 | Poly 2 |  | 1.0 | 1.0 | -123.7 |
| ENSG00000184481 | Exp 4 | foxo4 | 1.0 | 0.7 | -6.3 |
| ENSG00000239264 | Poly 3 | txndc5 | 1.0 | 0.0 | 83.6 |
| ENSG00000131747 | Exp 2 | top2a | 1.0 | 0.4 | 394.8 |
| ENSG00000254373 | Poly 2 |  | 1.0 | 0.0 | -48.1 |
| ENSG00000182901 | Poly 2 | rgs7 | 1.1 | 0.9 | -31.4 |
| ENSG00000218227 | Poly 2 |  | 1.1 | 0.5 | -71.5 |
| ENSG00000274997 | Exp 2 | hist1h2ah | 1.1 | 0.5 | 263.9 |
| ENSG00000050438 | Linear | slc4a8 | 1.1 | 0.8 | 1.8 |
| ENSG00000185432 | Exp 2 | mettl7a | 1.1 | 0.5 | -24.8 |
| ENSG00000109063 | Poly 2 | myh3 | 1.1 | 0.5 | 86.6 |
| ENSG00000235560 | Poly 2 |  | 1.1 | 0.1 | -59.8 |
| ENSG00000229056 | Poly 2 |  | 1.1 | 0.1 | -73.9 |
| ENSG00000087586 | Exp 2 | aurka | 1.1 | 0.5 | 241.2 |
| ENSG00000250337 | Poly 3 | linc01021 | 1.1 | 0.1 | -97.5 |
| ENSG00000161513 | Exp 2 | fdxr | 1.1 | 0.8 | 102.0 |
| ENSG00000235297 | Poly 2 |  | 1.1 | 0.4 | -101.9 |
| ENSG00000137273 | Exp 4 | foxf2 | 1.1 | 0.9 | 20.9 |
| ENSG00000089041 | Linear | p2rx7 | 1.1 | 0.5 | -75.1 |
| ENSG00000072041 | Exp 2 | slc6a15 | 1.1 | 0.8 | 120.6 |
| ENSG00000092758 | Linear | col9a3 | 1.1 | 0.6 | -45.5 |
| ENSG00000197837 | Poly 2 | hist4h4 | 1.1 | 0.8 | 191.1 |
| ENSG00000173175 | Linear | adcy5 | 1.1 | 0.2 | -119.5 |
| ENSG00000158055 | Linear | grhl3 | 1.1 | 0.2 | -121.4 |
| ENSG00000158406 | Exp 4 | hist1h4h | 1.1 | 0.5 | 286.6 |
| ENSG00000184678 | Poly 2 | hist2h2be | 1.1 | 0.7 | 243.8 |
| ENSG00000132639 | Poly 2 | snap25 | 1.1 | 0.3 | -38.8 |
| ENSG00000225950 | Exp 4 | ntf4 | 1.1 | 0.8 | -89.4 |
| ENSG00000144681 | Exp 2 | stac | 1.1 | 0.9 | 74.2 |
| ENSG00000153208 | Exp 2 | mertk | 1.1 | 0.1 | -54.6 |
| ENSG00000047346 | Exp 2 | fam214a | 1.2 | 1.0 | 109.9 |
| ENSG00000197153 | Exp 2 | hist1h3j | 1.2 | 0.6 | 212.9 |
| ENSG00000187653 | Poly 2 |  | 1.2 | 0.3 | -38.0 |
| ENSG00000223485 | Linear | linc01615 | 1.2 | 0.3 | 22.9 |
| ENSG00000044524 | Exp 2 | epha3 | 1.2 | 0.9 | -4.4 |
| ENSG00000091986 | Exp 2 | ccdc80 | 1.2 | 0.2 | 364.1 |
| ENSG00000163694 | Linear | rbm47 | 1.2 | 0.3 | -41.2 |
| ENSG00000170961 | Poly 2 | has2 | 1.2 | 1.0 | -38.7 |
| ENSG00000164611 | Linear | pttg1 | 1.2 | 0.2 | 255.9 |
| ENSG00000118292 | Exp 5 | c1orf54 | 1.2 | 0.1 | -45.7 |
| ENSG00000255561 | Poly 2 | fdxacb1 | 1.2 | 0.0 | -42.1 |
| ENSG00000171365 | Exp 4 | clcn5 | 1.2 | 0.7 | 6.2 |
| ENSG00000148848 | Poly 2 | adam12 | 1.2 | 0.6 | 182.5 |
| ENSG00000116761 | Poly 2 | cth | 1.2 | 0.6 | 37.7 |
| ENSG00000206075 | Linear | serpinb5 | 1.2 | 0.2 | -125.0 |
| ENSG00000161896 | Exp 2 | ip6k3 | 1.2 | 0.2 | -85.6 |
| ENSG00000168918 | Exp 2 | inpp5d | 1.2 | 0.4 | -63.8 |
| ENSG00000100504 | Linear | pygl | 1.2 | 0.4 | 231.4 |
| ENSG00000164520 | Poly 2 | raet1e | 1.2 | 0.6 | -46.7 |
| ENSG00000215458 | Linear | aatbc | 1.2 | 0.6 | -216.3 |
| ENSG00000073464 | Exp 2 | clcn4 | 1.2 | 0.6 | 24.1 |
| ENSG00000054277 | Exp 2 | opn3 | 1.2 | 1.0 | 75.9 |
| ENSG00000175048 | Poly 2 | zdhhc14 | 1.2 | 0.6 | -60.0 |
| ENSG00000175155 | Linear | ypel2 | 1.2 | 0.9 | 40.8 |
| ENSG00000276115 | Poly 2 |  | 1.2 | 0.9 | -88.7 |
| ENSG00000103485 | Linear | qprt | 1.2 | 1.0 | 15.1 |
| ENSG00000158457 | Linear | tspan33 | 1.2 | 0.8 | -48.9 |
| ENSG00000272716 | Poly 2 |  | 1.3 | 0.8 | -115.1 |
| ENSG00000196787 | Exp 2 | hist1h2ag | 1.3 | 0.3 | 300.0 |
| ENSG00000065320 | Linear | ntn1 | 1.3 | 0.1 | -136.0 |
| ENSG00000144891 | Poly 2 | agtr1 | 1.3 | 0.7 | 12.4 |
| ENSG00000239521 | Exp 2 | gats | 1.3 | 0.6 | -15.4 |
| ENSG00000092140 | Linear | g2e3 | 1.3 | 0.9 | 244.5 |
| ENSG00000169994 | Exp 4 | myo7b | 1.3 | 0.7 | 103.7 |
| ENSG00000123933 | Exp 2 | mxd4 | 1.3 | 1.0 | 157.5 |
| ENSG00000126709 | Linear | ifi6 | 1.3 | 0.7 | 46.1 |
| ENSG00000086619 | Linear | ero1b | 1.3 | 0.5 | 19.0 |
| ENSG00000128965 | Poly 2 | chac1 | 1.3 | 0.9 | 194.7 |
| ENSG00000178401 | Linear | dnajc22 | 1.3 | 0.7 | 119.3 |
| ENSG00000177459 | Linear | erich5 | 1.3 | 0.9 | 9.2 |
| ENSG00000168824 | Linear | nsg1 | 1.3 | 0.3 | -136.1 |
| ENSG00000117461 | Exp 2 | pik3r3 | 1.3 | 0.6 | 59.2 |
| ENSG00000277224 | Exp 2 | hist1h2bf | 1.3 | 0.4 | 210.1 |
| ENSG00000104870 | Linear | fcgrt | 1.3 | 0.9 | 120.3 |
| ENSG00000168209 | Poly 2 | ddit4 | 1.3 | 1.0 | 220.0 |
| ENSG00000183775 | Poly 2 | kctd16 | 1.3 | 1.0 | -40.7 |
| ENSG00000132623 | Linear | ankef1 | 1.3 | 0.7 | -71.9 |
| ENSG00000010030 | Exp 4 | etv7 | 1.3 | 1.0 | -65.6 |
| ENSG00000123609 | Linear | nmi | 1.3 | 0.8 | 14.0 |
| ENSG00000250159 | Linear |  | 1.3 | 0.2 | -52.4 |
| ENSG00000248713 | Poly 2 | rp11-766f14.2 | 1.3 | 0.1 | -119.1 |
| ENSG00000233559 | Linear |  | 1.3 | 0.4 | -69.8 |
| ENSG00000122641 | Poly 2 | inhba | 1.3 | 0.3 | 252.3 |
| ENSG00000074410 | Exp 2 | ca12 | 1.3 | 0.7 | 41.7 |
| ENSG00000187994 | Linear | rinl | 1.3 | 1.0 | -44.4 |
| ENSG00000181788 | Exp 2 | siah2 | 1.3 | 0.7 | 135.2 |
| ENSG00000101849 | Exp 4 | tbl1x | 1.3 | 0.3 | 105.3 |
| ENSG00000115129 | Linear | tp53i3 | 1.3 | 0.2 | 149.7 |
| ENSG00000205746 | Poly 2 |  | 1.3 | 0.8 | -27.9 |
| ENSG00000166839 | Linear | ankdd1a | 1.3 | 0.9 | -55.1 |
| ENSG00000229720 | Exp 2 | rp3-495k2.2 | 1.3 | 0.9 | -86.7 |
| ENSG00000100027 | Exp 2 | ypel1 | 1.3 | 1.0 | 59.7 |
| ENSG00000146674 | Linear | igfbp3 | 1.3 | 0.7 | 275.0 |
| ENSG00000249306 | Poly 2 | linc01411 | 1.4 | 0.9 | -103.3 |
| ENSG00000157150 | Linear | timp4 | 1.4 | 0.7 | -12.7 |
| ENSG00000113739 | Exp 2 | stc2 | 1.4 | 0.4 | 240.5 |
| ENSG00000260912 | Exp 2 |  | 1.4 | 0.0 | -80.8 |
| ENSG00000117724 | Linear | cenpf | 1.4 | 0.8 | 340.2 |
| ENSG00000250903 | Exp 2 |  | 1.4 | 0.8 | -47.1 |
| ENSG00000134057 | Linear | ccnb1 | 1.4 | 0.2 | 335.1 |
| ENSG00000120594 | Exp 4 | plxdc2 | 1.4 | 0.2 | 8.6 |
| ENSG00000237187 | Exp 2 | nr2f1-as1 | 1.4 | 0.0 | -25.4 |
| ENSG00000234546 | Linear | linc01759 | 1.4 | 0.6 | -157.6 |
| ENSG00000188368 | Poly 2 | prr19 | 1.4 | 0.8 | -40.4 |
| ENSG00000274290 | Linear | hist1h2be | 1.4 | 1.0 | 12.1 |
| ENSG00000118894 | Poly 2 | eef2kmt | 1.4 | 0.7 | 41.6 |
| ENSG00000133101 | Linear | ccna1 | 1.4 | 0.0 | -62.5 |
| ENSG00000168071 | Linear | ccdc88b | 1.4 | 0.3 | -75.0 |
| ENSG00000230450 | Poly 3 |  | 1.4 | 0.4 | -163.4 |
| ENSG00000066468 | Exp 2 | fgfr2 | 1.4 | 0.7 | 47.3 |
| ENSG00000064199 | Linear | spa17 | 1.4 | 0.6 | 25.3 |
| ENSG00000278828 | Exp 2 | hist1h3h | 1.4 | 0.5 | 282.7 |
| ENSG00000135549 | Exp 2 | pkib | 1.4 | 0.6 | 29.1 |
| ENSG00000158402 | Exp 2 | cdc25c | 1.4 | 0.1 | 157.4 |
| ENSG00000239713 | Linear | apobec3g | 1.5 | 0.1 | -44.5 |
| ENSG00000138606 | Linear | shf | 1.5 | 0.9 | 27.3 |
| ENSG00000278463 | Exp 2 | hist1h2ab | 1.5 | 0.4 | 190.3 |
| ENSG00000105650 | Poly 3 | pde4c;pde4c | 1.5 | 0.4 | -97.4 |
| ENSG00000143036 | Linear | slc44a3 | 1.5 | 0.6 | -49.7 |
| ENSG00000064687 | Linear | abca7 | 1.5 | 0.8 | 58.4 |
| ENSG00000227354 | Linear | rbm26-as1 | 1.5 | 0.4 | -29.0 |
| ENSG00000278023 | Linear | rdm1 | 1.5 | 0.5 | -68.4 |
| ENSG00000167994 | Poly 2 | rab3il1 | 1.5 | 0.2 | -67.0 |
| ENSG00000043143 | Linear | jade2 | 1.5 | 0.9 | 136.8 |
| ENSG00000178038 | Linear | als2cl | 1.5 | 0.9 | -24.9 |
| ENSG00000204219 | Linear | tcea3 | 1.5 | 0.4 | -84.9 |
| ENSG00000087842 | Linear | pir | 1.5 | 0.5 | 1.2 |
| ENSG00000175764 | Exp 4 | ttll11 | 1.5 | 0.2 | -96.0 |
| ENSG00000139597 | Linear | n4bp2l1 | 1.5 | 0.6 | -41.1 |
| ENSG00000125247 | Linear | tmtc4 | 1.5 | 0.7 | 21.8 |
| ENSG00000135919 | Linear | serpine2 | 1.5 | 0.7 | 79.4 |
| ENSG00000280744 | Linear | linc01173 | 1.5 | 0.3 | -217.6 |
| ENSG00000129195 | Exp 2 | fam64a | 1.5 | 0.1 | 214.3 |
| ENSG00000108187 | Exp 2 | pbld | 1.5 | 0.8 | 1.7 |
| ENSG00000233695 | Linear |  | 1.5 | 0.0 | -111.0 |
| ENSG00000180573 | Exp 2 | hist1h2ac | 1.5 | 0.3 | 286.7 |
| ENSG00000167861 | Exp 2 | hid1 | 1.5 | 0.7 | 0.6 |
| ENSG00000175745 | Linear | nr2f1 | 1.5 | 0.5 | 58.7 |
| ENSG00000253537 | Poly 2 | pcdhga7 | 1.5 | 0.6 | -49.0 |
| ENSG00000163449 | Linear | tmem169 | 1.5 | 0.8 | 34.8 |
| ENSG00000235213 | Poly 3 |  | 1.6 | 0.0 | -183.1 |
| ENSG00000146477 | Exp 2 | slc22a3 | 1.6 | 0.9 | 37.9 |
| ENSG00000008323 | Linear | plekhg6 | 1.6 | 0.4 | -90.8 |
| ENSG00000261553 | Exp 2 |  | 1.6 | 0.1 | -9.6 |
| ENSG00000140263 | Poly 2 | sord | 1.6 | 0.1 | 103.4 |
| ENSG00000185361 | Exp 2 | tnfaip8l1 | 1.6 | 1.0 | 124.8 |
| ENSG00000277639 | Linear | rp11-467j12.4 | 1.6 | 0.3 | -154.4 |
| ENSG00000170075 | Poly 2 | gpr37l1 | 1.6 | 0.5 | -183.3 |
| ENSG00000133019 | Exp 2 | chrm3 | 1.6 | 0.6 | -35.8 |
| ENSG00000275126 | Exp 2 | hist1h4l | 1.6 | 0.2 | 226.0 |
| ENSG00000197892 | Exp 2 | kif13b | 1.6 | 1.0 | 124.4 |
| ENSG00000165272 | Linear | aqp3 | 1.6 | 0.6 | -2.0 |
| ENSG00000258616 | Linear |  | 1.6 | 0.1 | -214.0 |
| ENSG00000149809 | Exp 2 | tm7sf2 | 1.6 | 1.0 | 73.0 |
| ENSG00000117394 | Linear | slc2a1 | 1.6 | 0.3 | 237.4 |
| ENSG00000264301 | Exp 2 | linc01444 | 1.6 | 0.7 | -44.2 |
| ENSG00000188596 | Linear | cfap54 | 1.6 | 0.1 | -92.1 |
| ENSG00000277157 | Exp 2 | hist1h4d | 1.6 | 0.2 | 208.0 |
| ENSG00000243955 | Exp 2 | gsta1 | 1.6 | 0.8 | -14.8 |
| ENSG00000228526 | Linear | mir34ahg | 1.6 | 0.8 | -106.2 |
| ENSG00000185436 | Linear | ifnlr1 | 1.6 | 0.9 | -42.6 |
| ENSG00000124635 | Exp 2 | hist1h2bj | 1.6 | 0.4 | 296.9 |
| ENSG00000203999 | Linear | linc01270 | 1.6 | 0.0 | -77.2 |
| ENSG00000115107 | Exp 2 | steap3 | 1.6 | 0.5 | -17.6 |
| ENSG00000107562 | Linear | cxcl12 | 1.7 | 0.8 | 48.6 |
| ENSG00000116991 | Exp 2 | sipa1l2 | 1.7 | 0.9 | 39.3 |
| ENSG00000135828 | Linear | rnasel | 1.7 | 0.8 | -23.9 |
| ENSG00000258101 | Exp 2 |  | 1.7 | 1.0 | -35.8 |
| ENSG00000114796 | Exp 2 | klhl24 | 1.7 | 1.0 | 128.8 |
| ENSG00000104899 | Poly 2 | amh | 1.7 | 0.5 | 36.7 |
| ENSG00000159314 | Exp 2 | arhgap27 | 1.7 | 0.8 | 51.4 |
| ENSG00000118898 | Linear | ppl | 1.7 | 0.7 | -28.4 |
| ENSG00000162755 | Exp 2 | klhdc9 | 1.7 | 0.5 | -104.1 |
| ENSG00000185745 | Linear | ifit1 | 1.7 | 0.0 | 102.2 |
| ENSG00000177076 | Exp 2 | acer2 | 1.7 | 0.3 | -72.4 |
| ENSG00000107796 | Exp 2 | acta2 | 1.7 | 1.0 | 304.7 |
| ENSG00000129038 | Exp 2 | loxl1 | 1.7 | 0.7 | 222.3 |
| ENSG00000259404 | Exp 5 |  | 1.7 | 0.2 | -105.1 |
| ENSG00000184009 | Exp 2 | actg1 | 1.7 | 0.8 | 500.1 |
| ENSG00000275221 | Exp 2 | hist1h2ak | 1.7 | 0.4 | 120.5 |
| ENSG00000249715 | Exp 2 | fer1l5 | 1.7 | 0.7 | -65.8 |
| ENSG00000069712 | Exp 2 | kiaa1107 | 1.7 | 0.7 | -27.5 |
| ENSG00000164237 | Exp 2 | cmbl | 1.7 | 1.0 | -30.1 |
| ENSG00000151376 | Exp 2 | me3 | 1.7 | 0.9 | 112.9 |
| ENSG00000145934 | Linear | tenm2 | 1.7 | 0.7 | 235.0 |
| ENSG00000055732 | Exp 2 | mcoln3 | 1.7 | 0.5 | -22.6 |
| ENSG00000156042 | Exp 2 | cfap70 | 1.7 | 0.2 | -70.5 |
| ENSG00000196890 | Exp 2 | hist3h2bb | 1.7 | 0.4 | 59.1 |
| ENSG00000021645 | Exp 2 | nrxn3 | 1.7 | 0.4 | 156.4 |
| ENSG00000151789 | Linear | znf385d | 1.7 | 0.7 | -95.9 |
| ENSG00000112902 | Exp 2 | sema5a | 1.7 | 0.6 | 165.8 |
| ENSG00000008513 | Linear | st3gal1 | 1.7 | 0.6 | 61.8 |
| ENSG00000139263 | Exp 2 | lrig3 | 1.8 | 0.0 | 88.3 |
| ENSG00000082482 | Linear | kcnk2 | 1.8 | 0.9 | -38.7 |
| ENSG00000267278 | Linear | map3k14-as1 | 1.8 | 0.0 | -90.4 |
| ENSG00000214357 | Exp 2 | neurl1b | 1.8 | 0.9 | 95.1 |
| ENSG00000111837 | Linear | mak | 1.8 | 0.4 | -124.9 |
| ENSG00000248508 | Exp 2 | srp14-as1 | 1.8 | 1.0 | -39.8 |
| ENSG00000135069 | Poly 2 | psat1 | 1.8 | 0.2 | 350.0 |
| ENSG00000132793 | Exp 2 | lpin3 | 1.8 | 0.8 | -31.3 |
| ENSG00000198624 | Exp 2 | ccdc69 | 1.8 | 0.2 | -48.9 |
| ENSG00000153885 | Exp 2 | kctd15 | 1.8 | 0.8 | 145.8 |
| ENSG00000168672 | Linear | fam84b | 1.8 | 0.8 | 242.1 |
| ENSG00000175938 | Linear | orai3 | 1.8 | 0.9 | -25.7 |
| ENSG00000161509 | Exp 5 | grin2c | 1.8 | 0.2 | -169.3 |
| ENSG00000179299 | Linear | nsun7 | 1.8 | 0.8 | -23.8 |
| ENSG00000271335 | Exp 5 |  | 1.8 | 0.4 | -68.5 |
| ENSG00000162490 | Exp 5 | draxin | 1.8 | 0.2 | -102.7 |
| ENSG00000171219 | Linear | cdc42bpg | 1.8 | 0.1 | -53.3 |
| ENSG00000104177 | Exp 2 | myef2 | 1.8 | 0.5 | 214.5 |
| ENSG00000187837 | Exp 5 | hist1h1c | 1.8 | 0.2 | 356.2 |
| ENSG00000119915 | Linear | elovl3 | 1.8 | 0.3 | -121.8 |
| ENSG00000173805 | Exp 2 | hap1 | 1.8 | 0.4 | -23.8 |
| ENSG00000178409 | Linear | bend3 | 1.8 | 0.9 | 88.0 |
| ENSG00000124575 | Exp 5 | hist1h1d | 1.8 | 0.2 | 167.4 |
| ENSG00000281103 | Linear | trg-as1 | 1.8 | 0.2 | -96.7 |
| ENSG00000251095 | Exp 2 |  | 1.8 | 0.3 | -137.3 |
| ENSG00000080823 | Exp 2 | mok | 1.8 | 0.9 | 210.0 |
| ENSG00000105851 | Linear | pik3cg | 1.8 | 0.8 | -68.3 |
| ENSG00000112303 | Linear | vnn2 | 1.8 | 0.2 | -122.4 |
| ENSG00000253636 | Poly 2 |  | 1.8 | 0.5 | -64.3 |
| ENSG00000189195 | Exp 2 |  | 1.9 | 0.7 | -87.2 |
| ENSG00000128422 | Linear | krt17 | 1.9 | 0.8 | 320.7 |
| ENSG00000121440 | Exp 2 | pdzrn3 | 1.9 | 0.5 | 4.4 |
| ENSG00000160539 | Exp 5 | plpp7 | 1.9 | 0.0 | -62.5 |
| ENSG00000185760 | Exp 2 | kcnq5 | 1.9 | 0.7 | 89.9 |
| ENSG00000148357 | Linear | hmcn2 | 1.9 | 0.3 | -189.0 |
| ENSG00000278637 | Exp 2 | hist1h4a | 1.9 | 0.7 | 155.3 |
| ENSG00000274447 | Linear |  | 1.9 | 0.9 | -115.5 |
| ENSG00000266401 | Linear |  | 1.9 | 0.8 | -19.7 |
| ENSG00000169583 | Linear | clic3 | 1.9 | 0.7 | 68.9 |
| ENSG00000115232 | Linear | itga4 | 1.9 | 0.7 | 153.8 |
| ENSG00000233369 | Exp 2 | gtf2ip4 | 1.9 | 0.4 | -30.4 |
| ENSG00000198081 | Exp 2 | zbtb14 | 1.9 | 0.6 | 95.4 |
| ENSG00000021300 | Linear | plekhb1 | 1.9 | 0.8 | -83.3 |
| ENSG00000188825 | Exp 5 | linc00910 | 1.9 | 0.1 | -117.8 |
| ENSG00000160307 | Exp 5 | s100b | 1.9 | 0.1 | -96.8 |
| ENSG00000119943 | Exp 2 | pyroxd2 | 1.9 | 0.1 | -41.6 |
| ENSG00000157873 | Exp 2 | tnfrsf14 | 1.9 | 0.1 | -151.0 |
| ENSG00000135119 | Exp 2 | rnft2 | 1.9 | 0.8 | 117.6 |
| ENSG00000174371 | Linear | exo1 | 1.9 | 0.0 | 184.3 |
| ENSG00000175793 | Linear | sfn | 1.9 | 0.1 | -72.8 |
| ENSG00000201077 | Poly 2 |  | 1.9 | 0.3 | -175.1 |
| ENSG00000184675 | Exp 2 | amer1 | 1.9 | 0.7 | 64.6 |
| ENSG00000172508 | Exp 2 | carns1 | 1.9 | 0.3 | -93.0 |
| ENSG00000116774 | Linear | olfml3 | 1.9 | 0.2 | -9.5 |
| ENSG00000163536 | Linear | serpini1 | 1.9 | 0.6 | 42.3 |
| ENSG00000165113 | Linear | gkap1 | 1.9 | 0.9 | 14.5 |
| ENSG00000189007 | Exp 2 | adat2 | 1.9 | 0.9 | 4.6 |
| ENSG00000259362 | Exp 2 | rp11-307c19.1 | 1.9 | 0.0 | -158.3 |
| ENSG00000197496 | Exp 2 | slc2a10 | 1.9 | 0.7 | 9.0 |
| ENSG00000116299 | Exp 2 | kiaa1324 | 1.9 | 0.5 | -41.4 |
| ENSG00000203805 | Linear | plpp4 | 1.9 | 0.0 | 38.8 |
| ENSG00000100982 | Poly 2 | pcif1 | 2.0 | 0.5 | 118.8 |
| ENSG00000174844 | Linear | dnah12 | 2.0 | 0.5 | -172.1 |
| ENSG00000157064 | Exp 2 | nmnat2 | 2.0 | 0.7 | 37.0 |
| ENSG00000146411 | Linear | slc2a12 | 2.0 | 0.8 | -32.6 |
| ENSG00000162433 | Exp 2 | ak4 | 2.0 | 0.9 | 202.9 |
| ENSG00000162643 | Exp 2 | wdr63 | 2.0 | 0.3 | -128.8 |
| ENSG00000179715 | Poly 2 | pced1b | 2.0 | 0.9 | -32.0 |
| ENSG00000281357 | Linear | arrdc3-as1 | 2.0 | 1.0 | -66.4 |
| ENSG00000183598 | Exp 2 | hist2h3d | 2.0 | 0.4 | 153.4 |
| ENSG00000136040 | Exp 2 | plxnc1 | 2.0 | 0.2 | -32.0 |
| ENSG00000278705 | Exp 2 | hist1h4b | 2.0 | 0.6 | 293.4 |
| ENSG00000150893 | Linear | frem2 | 2.0 | 0.0 | -55.8 |
| ENSG00000241935 | Linear | hoga1 | 2.0 | 0.8 | -58.5 |
| ENSG00000173535 | Linear | tnfrsf10c | 2.0 | 0.3 | -53.8 |
| ENSG00000196562 | Exp 2 | sulf2 | 2.0 | 0.6 | -120.8 |
| ENSG00000183496 | Exp 2 | mex3b | 2.0 | 0.6 | 77.1 |
| ENSG00000151117 | Exp 2 | tmem86a | 2.0 | 0.9 | -149.0 |
| ENSG00000169432 | Exp 2 | scn9a | 2.0 | 0.9 | 161.8 |
| ENSG00000138795 | Poly 2 | lef1 | 2.0 | 0.3 | 137.6 |
| ENSG00000069020 | Exp 2 | mast4 | 2.0 | 0.2 | 11.2 |
| ENSG00000128596 | Exp 2 | ccdc136 | 2.0 | 0.8 | -5.7 |
| ENSG00000103490 | Linear | pycard | 2.1 | 0.5 | -67.9 |
| ENSG00000127863 | Linear | tnfrsf19 | 2.1 | 0.9 | 200.2 |
| ENSG00000137880 | Linear | gchfr | 2.1 | 0.9 | 40.5 |
| ENSG00000105988 | Poly 3 |  | 2.1 | 0.3 | -109.3 |
| ENSG00000163346 | Exp 2 | pbxip1 | 2.1 | 0.5 | 176.1 |
| ENSG00000118257 | Exp 2 | nrp2 | 2.1 | 0.7 | 173.5 |
| ENSG00000257803 | Linear |  | 2.1 | 0.3 | -65.8 |
| ENSG00000198133 | Exp 2 | tmem229b | 2.1 | 0.0 | -149.4 |
| ENSG00000146197 | Linear | scube3 | 2.1 | 0.7 | -44.0 |
| ENSG00000241155 | Poly 2 | arhgap31-as1 | 2.1 | 0.0 | -97.3 |
| ENSG00000205089 | Linear | ccni2 | 2.1 | 0.8 | -64.0 |
| ENSG00000204291 | Exp 2 | col15a1 | 2.1 | 0.4 | 13.8 |
| ENSG00000102904 | Linear | tsnaxip1 | 2.1 | 1.0 | -75.3 |
| ENSG00000239373 | Poly 3 |  | 2.1 | 0.0 | -133.9 |
| ENSG00000132879 | Exp 2 | fbxo44 | 2.1 | 0.9 | 23.1 |
| ENSG00000273045 | Linear | c2orf15 | 2.1 | 0.1 | -86.8 |
| ENSG00000165828 | Exp 2 | prap1 | 2.1 | 0.7 | -178.4 |
| ENSG00000276368 | Linear | hist1h2aj | 2.1 | 0.5 | 127.6 |
| ENSG00000197852 | Exp 2 | fam212b;fam212b | 2.1 | 0.8 | -28.7 |
| ENSG00000162267 | Linear | itih3 | 2.1 | 0.8 | -110.1 |
| ENSG00000165171 | Linear | wbscr27 | 2.1 | 0.8 | -91.5 |
| ENSG00000153993 | Linear | sema3d | 2.1 | 1.0 | 145.5 |
| ENSG00000180730 | Linear | shisa2 | 2.1 | 0.9 | 1.7 |
| ENSG00000100490 | Exp 2 | cdkl1 | 2.1 | 0.9 | 8.7 |
| ENSG00000166289 | Exp 2 | plekhf1 | 2.1 | 0.7 | 19.2 |
| ENSG00000141668 | Exp 2 | cbln2 | 2.1 | 0.7 | -12.9 |
| ENSG00000164342 | Exp 2 | tlr3 | 2.1 | 0.2 | -17.3 |
| ENSG00000175318 | Exp 2 | gramd2 | 2.1 | 0.5 | -77.5 |
| ENSG00000112773 | Linear | fam46a | 2.1 | 0.8 | 105.9 |
| ENSG00000184985 | Poly 2 | sorcs2 | 2.1 | 0.8 | -88.7 |
| ENSG00000269998 | Poly 2 |  | 2.1 | 0.2 | -150.2 |
| ENSG00000235748 | Exp 2 |  | 2.1 | 0.3 | -72.9 |
| ENSG00000261008 | Exp 2 | linc01572 | 2.1 | 0.2 | -15.2 |
| ENSG00000196074 | Linear | sycp2 | 2.1 | 0.4 | 30.6 |
| ENSG00000178031 | Exp 2 | adamtsl1 | 2.1 | 0.7 | 114.5 |
| ENSG00000205426 | Exp 2 | krt81 | 2.1 | 0.5 | -92.1 |
| ENSG00000170854 | Linear | riox2 | 2.1 | 0.3 | 131.1 |
| ENSG00000041982 | Exp 2 | tnc | 2.1 | 0.2 | 270.7 |
| ENSG00000111186 | Linear | wnt5b | 2.1 | 0.6 | 93.1 |
| ENSG00000116983 | Exp 2 | hpcal4 | 2.1 | 0.2 | -120.0 |
| ENSG00000121057 | Exp 2 | akap1 | 2.1 | 0.2 | 136.4 |
| ENSG00000185339 | Exp 2 | tcn2 | 2.1 | 0.8 | -59.7 |
| ENSG00000198157 | Poly 3 | hmgn5 | 2.1 | 0.0 | -25.3 |
| ENSG00000146021 | Exp 2 | klhl3 | 2.2 | 0.3 | -52.6 |
| ENSG00000211584 | Exp 2 | slc48a1 | 2.2 | 0.9 | 104.2 |
| ENSG00000179431 | Linear | fjx1 | 2.2 | 0.9 | 95.9 |
| ENSG00000205085 | Exp 2 | fam71f2 | 2.2 | 0.8 | -71.2 |
| ENSG00000166311 | Exp 2 | smpd1 | 2.2 | 0.7 | 83.4 |
| ENSG00000142619 | Exp 2 | padi3 | 2.2 | 0.3 | -138.8 |
| ENSG00000133816 | Linear | mical2 | 2.2 | 0.5 | 282.8 |
| ENSG00000170542 | Exp 2 | serpinb9 | 2.2 | 0.7 | 127.2 |
| ENSG00000102981 | Linear | pard6a | 2.2 | 0.8 | 25.9 |
| ENSG00000139182 | Exp 2 | clstn3 | 2.2 | 0.9 | 141.8 |
| ENSG00000118997 | Exp 2 | dnah7 | 2.2 | 0.4 | -65.1 |
| ENSG00000137843 | Exp 2 | pak6 | 2.2 | 0.1 | -112.5 |
| ENSG00000103196 | Linear | crispld2 | 2.2 | 0.9 | 181.7 |
| ENSG00000130303 | Linear | bst2 | 2.2 | 0.6 | -69.2 |
| ENSG00000185070 | Exp 2 | flrt2 | 2.2 | 1.0 | 63.6 |
| ENSG00000003989 | Exp 2 | slc7a2 | 2.2 | 0.4 | 84.3 |
| ENSG00000135362 | Linear | prr5l | 2.2 | 0.7 | 139.8 |
| ENSG00000109861 | Linear | ctsc | 2.2 | 0.2 | 185.9 |
| ENSG00000010319 | Exp 2 | sema3g | 2.2 | 0.5 | -64.9 |
| ENSG00000100290 | Linear | bik | 2.2 | 0.7 | -89.1 |
| ENSG00000198074 | Exp 2 | akr1b10 | 2.2 | 0.2 | -185.8 |
| ENSG00000183722 | Exp 2 | lhfp | 2.2 | 0.6 | 121.0 |
| ENSG00000158106 | Exp 2 | rhpn1 | 2.2 | 1.0 | -1.2 |
| ENSG00000233521 | Linear | linc01638 | 2.2 | 1.0 | 52.9 |
| ENSG00000169621 | Exp 2 | aplf;aplf | 2.2 | 0.8 | 14.2 |
| ENSG00000178695 | Exp 2 | kctd12 | 2.2 | 1.0 | 147.5 |
| ENSG00000162998 | Linear | frzb | 2.2 | 0.4 | -95.4 |
| ENSG00000227908 | Linear | flj31104 | 2.2 | 0.2 | -131.3 |
| ENSG00000170271 | Exp 2 | faxdc2 | 2.2 | 1.0 | 33.9 |
| ENSG00000177788 | Linear |  | 2.2 | 0.1 | -127.9 |
| ENSG00000159399 | Exp 2 | hk2 | 2.2 | 0.8 | 216.7 |
| ENSG00000160460 | Linear | sptbn4 | 2.2 | 0.1 | -135.9 |
| ENSG00000277496 | Exp 2 |  | 2.3 | 0.1 | -155.6 |
| ENSG00000159388 | Poly 2 | btg2 | 2.3 | 0.8 | 32.4 |
| ENSG00000108771 | Exp 2 | dhx58 | 2.3 | 0.4 | -22.0 |
| ENSG00000177694 | Exp 2 | naaladl2 | 2.3 | 0.5 | -46.5 |
| ENSG00000253661 | Exp 2 | zfhx4-as1 | 2.3 | 0.7 | 23.6 |
| ENSG00000235884 | Exp 2 | linc00941 | 2.3 | 0.9 | 15.7 |
| ENSG00000197471 | Exp 2 | spn | 2.3 | 0.6 | 54.9 |
| ENSG00000149212 | Exp 2 | sesn3 | 2.3 | 0.9 | -6.0 |
| ENSG00000144810 | Exp 2 | col8a1 | 2.3 | 1.0 | 134.3 |
| ENSG00000130768 | Exp 2 | smpdl3b | 2.3 | 0.8 | -4.4 |
| ENSG00000174125 | Exp 2 | tlr1 | 2.3 | 0.9 | 47.4 |
| ENSG00000128604 | Exp 2 | irf5 | 2.3 | 0.7 | -17.5 |
| ENSG00000122986 | Exp 2 | hvcn1 | 2.3 | 0.3 | -117.5 |
| ENSG00000116679 | Linear | ivns1abp | 2.3 | 0.5 | 222.0 |
| ENSG00000170017 | Linear | alcam | 2.3 | 0.6 | 303.6 |
| ENSG00000134986 | Linear | nrep | 2.3 | 0.7 | 220.5 |
| ENSG00000235863 | Linear | b3galt4 | 2.3 | 0.2 | -57.2 |
| ENSG00000181045 | Exp 2 | slc26a11 | 2.3 | 0.6 | 46.4 |
| ENSG00000279207 | Linear |  | 2.3 | 0.0 | -30.5 |
| ENSG00000263470 | Exp 2 |  | 2.3 | 0.3 | -44.5 |
| ENSG00000166250 | Linear | clmp | 2.3 | 1.0 | 134.9 |
| ENSG00000166002 | Linear | smco4 | 2.3 | 0.6 | 11.1 |
| ENSG00000157680 | Linear | dgki | 2.3 | 0.7 | 73.4 |
| ENSG00000128833 | Exp 2 | myo5c | 2.3 | 1.0 | 147.9 |
| ENSG00000101255 | Poly 2 | trib3 | 2.3 | 0.8 | 203.8 |
| ENSG00000270049 | Linear | rp11-297d21.4 | 2.3 | 0.9 | -31.0 |
| ENSG00000132517 | Exp 2 | slc52a1 | 2.3 | 0.3 | -177.6 |
| ENSG00000166145 | Exp 2 | spint1 | 2.4 | 0.9 | 93.7 |
| ENSG00000197165 | Linear | sult1a2 | 2.4 | 0.1 | -123.4 |
| ENSG00000115648 | Exp 3 | mlph | 2.4 | 0.6 | 90.5 |
| ENSG00000270490 | Linear |  | 2.4 | 0.2 | -158.7 |
| ENSG00000168621 | Exp 2 | gdnf | 2.4 | 0.2 | 121.7 |
| ENSG00000164125 | Linear | fam198b | 2.4 | 0.9 | 154.1 |
| ENSG00000178685 | Exp 2 | parp10 | 2.4 | 0.8 | 62.7 |
| ENSG00000159214 | Exp 2 | ccdc24 | 2.4 | 0.9 | 21.6 |
| ENSG00000029534 | Linear | ank1 | 2.4 | 0.5 | 14.1 |
| ENSG00000198857 | Exp 2 |  | 2.4 | 0.7 | -185.5 |
| ENSG00000038427 | Exp 2 | vcan | 2.4 | 0.7 | 305.1 |
| ENSG00000177192 | Linear | pus1 | 2.4 | 0.5 | 119.5 |
| ENSG00000176842 | Exp 2 | irx5 | 2.4 | 0.5 | -47.5 |
| ENSG00000111679 | Linear | ptpn6 | 2.4 | 0.8 | -135.9 |
| ENSG00000173457 | Linear | ppp1r14b | 2.4 | 0.4 | 226.2 |
| ENSG00000100100 | Linear | pik3ip1 | 2.4 | 0.3 | -63.8 |
| ENSG00000132840 | Linear | bhmt2 | 2.4 | 0.4 | -132.8 |
| ENSG00000172379 | Exp 2 | arnt2 | 2.5 | 0.8 | 156.4 |
| ENSG00000278619 | Exp 2 | mrm1 | 2.5 | 0.8 | 51.0 |
| ENSG00000099953 | Linear | mmp11 | 2.5 | 0.9 | 16.6 |
| ENSG00000239213 | Linear |  | 2.5 | 0.9 | -37.2 |
| ENSG00000136859 | Exp 2 | angptl2 | 2.5 | 0.5 | -103.1 |
| ENSG00000196814 | Exp 2 | mvb12b | 2.5 | 0.9 | -106.2 |
| ENSG00000079385 | Exp 2 | ceacam1 | 2.5 | 0.5 | -188.1 |
| ENSG00000157168 | Exp 2 | nrg1 | 2.5 | 0.2 | 177.7 |
| ENSG00000222022 | Linear |  | 2.5 | 0.5 | -62.3 |
| ENSG00000103168 | Poly 2 | taf1c | 2.5 | 0.1 | 203.7 |
| ENSG00000163749 | Exp 2 | ccdc158 | 2.5 | 0.4 | -76.5 |
| ENSG00000256139 | Exp 2 |  | 2.5 | 0.8 | -154.9 |
| ENSG00000064763 | Poly 3 | far2 | 2.5 | 0.1 | -0.3 |
| ENSG00000253878 | Exp 2 |  | 2.5 | 0.0 | -130.9 |
| ENSG00000197646 | Linear | pdcd1lg2 | 2.5 | 0.9 | 33.1 |
| ENSG00000230189 | Linear |  | 2.5 | 0.7 | -65.4 |
| ENSG00000249242 | Linear | tmem150c | 2.5 | 0.8 | -96.2 |
| ENSG00000205861 | Exp 2 | pcoth | 2.6 | 1.0 | -47.5 |
| ENSG00000100307 | Exp 2 | cbx7 | 2.6 | 0.6 | 45.2 |
| ENSG00000136261 | Linear | bzw2 | 2.6 | 0.1 | 224.6 |
| ENSG00000206262 | Power | foxl2nb | 2.6 | 0.1 | -82.3 |
| ENSG00000164509 | Linear | il31ra | 2.6 | 0.8 | -99.3 |
| ENSG00000255145 | Linear | stx17-as1 | 2.6 | 0.2 | -170.9 |
| ENSG00000103710 | Linear | rasl12 | 2.6 | 0.9 | -73.3 |
| ENSG00000182179 | Linear | uba7 | 2.6 | 0.5 | -27.1 |
| ENSG00000119508 | Exp 2 | nr4a3 | 2.6 | 0.0 | -24.8 |
| ENSG00000280036 | Exp 2 |  | 2.6 | 0.1 | -111.1 |
| ENSG00000231007 | Exp 2 |  | 2.6 | 0.1 | -6.7 |
| ENSG00000154040 | Poly 2 | cabyr | 2.6 | 0.5 | 52.8 |
| ENSG00000143847 | Exp 2 | ppfia4 | 2.6 | 0.7 | 59.1 |
| ENSG00000145681 | Poly 2 | hapln1 | 2.6 | 0.5 | 205.6 |
| ENSG00000136449 | Exp 2 | mycbpap | 2.6 | 0.1 | -105.3 |
| ENSG00000141232 | Exp 2 | tob1 | 2.6 | 0.0 | 131.1 |
| ENSG00000245534 | Linear | rora-as1 | 2.6 | 0.9 | -127.1 |
| ENSG00000122420 | Exp 2 | ptgfr | 2.6 | 1.0 | 88.9 |
| ENSG00000060982 | Linear | bcat1 | 2.6 | 0.9 | 366.1 |
| ENSG00000173825 | Exp 2 | tigd3 | 2.7 | 0.4 | -74.7 |
| ENSG00000170962 | Exp 2 | pdgfd | 2.7 | 0.7 | -45.5 |
| ENSG00000133110 | Exp 2 | postn | 2.7 | 0.2 | 412.7 |
| ENSG00000226950 | Exp 2 | dancr | 2.7 | 0.5 | 77.2 |
| ENSG00000198003 | Linear | ccdc151 | 2.7 | 0.9 | -84.9 |
| ENSG00000265096 | Linear | c1qtnf1-as1 | 2.7 | 0.9 | -157.5 |
| ENSG00000095970 | Exp 2 | trem2 | 2.7 | 0.8 | -196.2 |
| ENSG00000270894 | Linear |  | 2.7 | 0.4 | -110.7 |
| ENSG00000177854 | Exp 2 | tmem187 | 2.7 | 0.4 | -57.1 |
| ENSG00000142494 | Exp 2 | slc47a1 | 2.7 | 0.4 | -86.8 |
| ENSG00000152256 | Exp 2 | pdk1 | 2.7 | 1.0 | 149.6 |
| ENSG00000236753 | Exp 2 | mkln1-as | 2.7 | 0.6 | -46.2 |
| ENSG00000250770 | Exp 2 |  | 2.7 | 0.5 | -176.6 |
| ENSG00000206567 | Exp 2 |  | 2.7 | 1.0 | -96.2 |
| ENSG00000281508 | Poly 3 |  | 2.7 | 0.2 | 71.5 |
| ENSG00000162241 | Exp 2 | slc25a45 | 2.7 | 0.9 | -54.4 |
| ENSG00000188404 | Exp 2 | sell | 2.7 | 0.6 | -70.2 |
| ENSG00000115461 | Linear | igfbp5 | 2.7 | 0.8 | 155.6 |
| ENSG00000130433 | Linear | cacng6 | 2.7 | 0.0 | -105.0 |
| ENSG00000138944 | Linear | kiaa1644 | 2.7 | 1.0 | 81.4 |
| ENSG00000167100 | Linear | samd14 | 2.7 | 0.5 | -31.7 |
| ENSG00000113356 | Linear | polr3g | 2.8 | 0.9 | 103.7 |
| ENSG00000119725 | Exp 2 | znf410 | 2.8 | 0.5 | -31.7 |
| ENSG00000118263 | Linear | klf7 | 2.8 | 0.6 | 184.8 |
| ENSG00000196352 | Linear | cd55 | 2.8 | 0.2 | 133.7 |
| ENSG00000186952 | Exp 2 | tmem232 | 2.8 | 0.8 | -70.8 |
| ENSG00000238243 | Exp 2 | or2w3 | 2.8 | 1.0 | 49.9 |
| ENSG00000149573 | Exp 2 | mpzl2 | 2.8 | 0.6 | -195.2 |
| ENSG00000183023 | Linear | slc8a1 | 2.8 | 0.4 | 124.5 |
| ENSG00000183010 | Exp 2 | pycr1 | 2.8 | 0.7 | 223.4 |
| ENSG00000143851 | Exp 2 | ptpn7 | 2.8 | 0.9 | -106.3 |
| ENSG00000090447 | Linear | tfap4 | 2.8 | 0.5 | 62.1 |
| ENSG00000244694 | Exp 2 | ptchd4 | 2.8 | 0.0 | -135.0 |
| ENSG00000243649 | Linear | cfb | 2.8 | 0.5 | -110.7 |
| ENSG00000224383 | Exp 2 | prr29 | 2.8 | 0.4 | -136.2 |
| ENSG00000198598 | Linear | mmp17 | 2.8 | 1.0 | -39.0 |
| ENSG00000171236 | Exp 2 | lrg1 | 2.8 | 0.8 | -165.1 |
| ENSG00000112182 | Linear | bach2 | 2.9 | 0.8 | -9.3 |
| ENSG00000258399 | Exp 2 |  | 2.9 | 0.9 | -38.4 |
| ENSG00000175920 | Linear | dok7 | 2.9 | 1.0 | 37.6 |
| ENSG00000222009 | Linear | btbd19 | 2.9 | 0.4 | 14.1 |
| ENSG00000173894 | Linear | cbx2 | 2.9 | 1.0 | 36.1 |
| ENSG00000274070 | Exp 2 | gatsl2 | 2.9 | 0.9 | 66.2 |
| ENSG00000196189 | Exp 2 | sema4a | 2.9 | 0.7 | -81.4 |
| ENSG00000160193 | Exp 2 | wdr4 | 2.9 | 0.9 | 100.4 |
| ENSG00000251669 | Linear | fam86ep | 2.9 | 0.8 | -21.2 |
| ENSG00000137460 | Exp 2 | fhdc1 | 2.9 | 0.8 | 44.2 |
| ENSG00000184838 | Exp 2 | prr16 | 2.9 | 0.9 | 10.3 |
| ENSG00000154646 | Linear | tmprss15 | 2.9 | 1.0 | 54.0 |
| ENSG00000198298 | Linear | znf485 | 2.9 | 0.3 | -24.0 |
| ENSG00000073536 | Exp 2 | nle1 | 2.9 | 0.7 | 163.7 |
| ENSG00000178773 | Linear | cpne7 | 2.9 | 0.8 | -52.4 |
| ENSG00000004799 | Exp 2 | pdk4 | 2.9 | 0.3 | -167.7 |
| ENSG00000105974 | Exp 3 | cav1 | 2.9 | 0.5 | 328.4 |
| ENSG00000142609 | Exp 2 | cfap74 | 2.9 | 0.0 | -177.9 |
| ENSG00000226688 | Linear | entpd1-as1 | 2.9 | 0.8 | 28.8 |
| ENSG00000137101 | Exp 2 | cd72 | 2.9 | 0.9 | -142.3 |
| ENSG00000118513 | Exp 2 | myb | 2.9 | 0.4 | -60.3 |
| ENSG00000128284 | Linear | apol3 | 2.9 | 0.1 | -85.5 |
| ENSG00000087116 | Exp 2 | adamts2 | 3.0 | 0.9 | 128.6 |
| ENSG00000049192 | Linear | adamts6 | 3.0 | 0.8 | 152.8 |
| ENSG00000273703 | Exp 2 | hist1h2bm | 3.0 | 0.6 | 5.6 |
| ENSG00000114626 | Exp 2 | abtb1 | 3.0 | 0.9 | 35.4 |
| ENSG00000196208 | Poly 2 | greb1 | 3.0 | 0.5 | -157.3 |
| ENSG00000278588 | Exp 2 | hist1h2bi | 3.0 | 0.5 | -17.6 |
| ENSG00000124787 | Linear | rpp40 | 3.0 | 0.6 | 134.5 |
| ENSG00000125257 | Exp 3 | abcc4 | 3.0 | 0.4 | 162.8 |
| ENSG00000182261 | Linear | nlrp10 | 3.0 | 0.8 | 29.4 |
| ENSG00000183688 | Poly 2 | rflnb | 3.0 | 0.3 | 154.1 |
| ENSG00000139211 | Linear | amigo2 | 3.0 | 0.8 | 292.4 |
| ENSG00000038295 | Linear | tll1 | 3.0 | 0.9 | 20.1 |
| ENSG00000115380 | Poly 2 | efemp1 | 3.0 | 0.6 | 219.1 |
| ENSG00000135312 | Linear | htr1b | 3.0 | 0.4 | -92.2 |
| ENSG00000130810 | Exp 2 | ppan | 3.0 | 0.7 | 39.9 |
| ENSG00000219607 | Linear | ppp1r3g | 3.0 | 1.0 | 61.0 |
| ENSG00000139209 | Linear | slc38a4 | 3.0 | 0.7 | -47.1 |
| ENSG00000196950 | Exp 3 | slc39a10 | 3.0 | 0.9 | 205.2 |
| ENSG00000088726 | Linear | tmem40 | 3.0 | 1.0 | 25.3 |
| ENSG00000171303 | Linear | kcnk3 | 3.0 | 0.9 | -110.8 |
| ENSG00000062038 | Linear | cdh3 | 3.1 | 1.0 | 44.6 |
| ENSG00000006283 | Exp 2 | cacna1g | 3.1 | 0.4 | -132.7 |
| ENSG00000137103 | Exp 2 | tmem8b | 3.1 | 0.7 | 5.8 |
| ENSG00000214106 | Exp 3 | paxip1-as2 | 3.1 | 0.4 | -58.9 |
| ENSG00000265107 | Linear | gja5 | 3.1 | 0.9 | 50.9 |
| ENSG00000259518 | Exp 2 | linc01583 | 3.1 | 0.8 | -1.9 |
| ENSG00000198121 | Linear | lpar1 | 3.1 | 0.6 | -1.9 |
| ENSG00000269416 | Exp 2 | linc01224 | 3.1 | 0.7 | 161.3 |
| ENSG00000259732 | Poly 2 |  | 3.1 | 0.4 | -107.6 |
| ENSG00000181754 | Poly 2 | amigo1 | 3.1 | 0.1 | -12.0 |
| ENSG00000105559 | Exp 2 | plekha4 | 3.1 | 0.8 | 118.3 |
| ENSG00000261056 | Exp 2 |  | 3.1 | 0.1 | -88.3 |
| ENSG00000138347 | Exp 2 | mypn | 3.1 | 1.0 | 34.7 |
| ENSG00000278390 | Exp 2 | rp11-74j13.8 | 3.1 | 0.8 | -73.9 |
| ENSG00000146072 | Linear | tnfrsf21 | 3.1 | 0.8 | 41.6 |
| ENSG00000112139 | Exp 2 | mdga1 | 3.1 | 0.9 | -81.6 |
| ENSG00000135525 | Linear | map7 | 3.1 | 0.2 | -9.2 |
| ENSG00000188290 | Exp 2 | hes4 | 3.1 | 0.2 | 137.1 |
| ENSG00000247095 | Linear | mir210hg | 3.1 | 1.0 | 36.2 |
| ENSG00000244067 | Power | gsta2 | 3.1 | 0.5 | -58.3 |
| ENSG00000186654 | Exp 2 | prr5 | 3.2 | 0.8 | -13.9 |
| ENSG00000168899 | Exp 2 | vamp5 | 3.2 | 0.4 | -12.4 |
| ENSG00000280143 | Exp 2 |  | 3.2 | 0.7 | 208.2 |
| ENSG00000230438 | Exp 2 |  | 3.2 | 0.0 | -152.5 |
| ENSG00000180535 | Linear | bhlha15 | 3.2 | 0.6 | -18.4 |
| ENSG00000259527 | Poly 2 | linc00052 | 3.2 | 0.4 | -120.2 |
| ENSG00000261143 | Linear |  | 3.2 | 0.4 | -175.8 |
| ENSG00000086991 | Exp 2 | nox4 | 3.2 | 1.0 | 47.1 |
| ENSG00000128917 | Exp 2 | dll4 | 3.2 | 0.1 | -69.1 |
| ENSG00000160183 | Linear | tmprss3 | 3.2 | 0.1 | -154.1 |
| ENSG00000111261 | Power | mansc1 | 3.2 | 0.4 | 61.4 |
| ENSG00000235513 | Poly 2 |  | 3.2 | 0.3 | -127.8 |
| ENSG00000185345 | Exp 2 | park2 | 3.2 | 0.5 | -164.4 |
| ENSG00000264635 | Linear |  | 3.2 | 0.6 | -77.9 |
| ENSG00000214553 | Exp 2 | lrrc37a11p | 3.2 | 0.0 | -144.5 |
| ENSG00000158125 | Exp 3 | xdh | 3.2 | 0.8 | 27.8 |
| ENSG00000072274 | Linear | tfrc | 3.2 | 0.4 | 362.3 |
| ENSG00000246263 | Exp 2 | ubr5-as1 | 3.3 | 0.2 | -75.1 |
| ENSG00000026559 | Exp 2 | kcng1 | 3.3 | 1.0 | 114.7 |
| ENSG00000089486 | Poly 2 | cdip1 | 3.3 | 0.2 | -6.6 |
| ENSG00000185904 | Linear | linc00839 | 3.3 | 0.2 | 139.0 |
| ENSG00000182752 | Exp 3 | pappa | 3.3 | 0.8 | 106.8 |
| ENSG00000005961 | Linear | itga2b | 3.3 | 0.9 | -59.4 |
| ENSG00000198947 | Power | dmd | 3.3 | 0.7 | 92.0 |
| ENSG00000277895 | Exp 2 |  | 3.3 | 0.8 | -113.4 |
| ENSG00000186847 | Linear | krt14 | 3.3 | 0.9 | 44.4 |
| ENSG00000276851 | Linear |  | 3.3 | 0.1 | -78.1 |
| ENSG00000233396 | Exp 2 | linc01719 | 3.3 | 0.7 | -89.4 |
| ENSG00000181418 | Linear | ddn | 3.3 | 0.5 | -7.6 |
| ENSG00000141574 | Poly 2 | sectm1 | 3.3 | 0.9 | -111.2 |
| ENSG00000183914 | Exp 2 | dnah2 | 3.3 | 0.7 | -168.0 |
| ENSG00000138759 | Exp 2 | fras1 | 3.3 | 0.7 | 86.4 |
| ENSG00000253404 | Linear | ac034243.1 | 3.3 | 0.2 | -112.6 |
| ENSG00000140416 | Poly 2 | tpm1 | 3.3 | 0.7 | 425.8 |
| ENSG00000164122 | Linear | asb5 | 3.4 | 0.4 | -92.3 |
| ENSG00000184584 | Exp 2 | tmem173 | 3.4 | 0.7 | 133.7 |
| ENSG00000156466 | Poly 2 | gdf6 | 3.4 | 0.6 | 184.4 |
| ENSG00000165105 | Linear | rasef | 3.4 | 0.9 | 55.6 |
| ENSG00000167680 | Exp 2 | sema6b | 3.4 | 0.9 | -7.9 |
| ENSG00000111664 | Exp 2 | gnb3 | 3.4 | 0.5 | 10.5 |
| ENSG00000232956 | Linear | snhg15 | 3.4 | 0.9 | 163.0 |
| ENSG00000196456 | Linear | znf775 | 3.4 | 0.2 | 0.1 |
| ENSG00000047936 | Linear | ros1 | 3.4 | 0.8 | -12.7 |
| ENSG00000054219 | Exp 2 | ly75 | 3.4 | 0.1 | -149.6 |
| ENSG00000123843 | Linear | c4bpb | 3.4 | 0.5 | -9.3 |
| ENSG00000139567 | Exp 2 | acvrl1 | 3.4 | 0.4 | -150.3 |
| ENSG00000233006 | Exp 2 | ac034220.3 | 3.4 | 0.4 | -66.9 |
| ENSG00000205363 | Exp 2 | c15orf59 | 3.4 | 0.0 | -102.5 |
| ENSG00000163083 | Exp 2 | inhbb | 3.4 | 1.0 | 147.3 |
| ENSG00000263513 | Linear | fam72c | 3.4 | 0.6 | -15.0 |
| ENSG00000019186 | Linear | cyp24a1 | 3.4 | 0.7 | 221.1 |
| ENSG00000246145 | Exp 2 | rrs1-as1 | 3.4 | 0.6 | -143.8 |
| ENSG00000148926 | Linear | adm | 3.5 | 0.5 | 228.8 |
| ENSG00000111885 | Linear | man1a1 | 3.5 | 0.6 | 57.1 |
| ENSG00000120658 | Linear | enox1 | 3.5 | 0.2 | -32.7 |
| ENSG00000116132 | Poly 2 | prrx1 | 3.5 | 0.4 | 65.8 |
| ENSG00000188766 | Exp 2 | spred3 | 3.5 | 0.2 | -4.9 |
| ENSG00000138028 | Linear | cgref1 | 3.5 | 0.8 | -78.5 |
| ENSG00000136999 | Linear | nov | 3.5 | 0.5 | -33.7 |
| ENSG00000186523 | Linear | fam86b1 | 3.5 | 0.1 | -79.6 |
| ENSG00000262728 | Exp 2 |  | 3.5 | 0.0 | -128.1 |
| ENSG00000178776 | Poly 2 | c5orf46 | 3.5 | 0.3 | 99.2 |
| ENSG00000165655 | Exp 2 | znf503 | 3.5 | 0.5 | 83.5 |
| ENSG00000169047 | Linear | irs1 | 3.5 | 0.7 | 202.6 |
| ENSG00000087076 | Exp 2 | hsd17b14 | 3.5 | 1.0 | -53.5 |
| ENSG00000197467 | Linear | col13a1 | 3.5 | 0.7 | -6.0 |
| ENSG00000184792 | Exp 2 | osbp2 | 3.5 | 1.0 | -29.6 |
| ENSG00000135439 | Poly 2 | agap2 | 3.5 | 0.6 | 18.0 |
| ENSG00000152953 | Linear | stk32b | 3.5 | 0.6 | -62.7 |
| ENSG00000257956 | Exp 2 |  | 3.5 | 0.1 | -12.7 |
| ENSG00000168490 | Exp 2 | phyhip | 3.6 | 0.4 | -57.9 |
| ENSG00000145990 | Power | gfod1 | 3.6 | 1.0 | 112.3 |
| ENSG00000184937 | Exp 2 | wt1 | 3.6 | 0.3 | 5.3 |
| ENSG00000090238 | Poly 2 | ypel3 | 3.6 | 0.2 | 23.3 |
| ENSG00000277775 | Exp 2 | hist1h3f | 3.6 | 1.0 | 37.6 |
| ENSG00000150687 | Poly 2 | prss23 | 3.6 | 0.5 | 261.3 |
| ENSG00000130813 | Exp 2 | c19orf66 | 3.6 | 0.2 | -17.0 |
| ENSG00000128510 | Poly 2 | cpa4 | 3.6 | 0.9 | 219.5 |
| ENSG00000185262 | Poly 2 | ubald2 | 3.6 | 0.4 | 118.7 |
| ENSG00000159733 | Exp 2 | zfyve28 | 3.6 | 0.9 | -64.6 |
| ENSG00000254244 | Exp 2 |  | 3.6 | 0.1 | -106.6 |
| ENSG00000160172 | Exp 2 | fam86c2p | 3.6 | 0.8 | -72.4 |
| ENSG00000164107 | Linear | hand2 | 3.6 | 0.3 | -52.5 |
| ENSG00000165861 | Exp 3 | zfyve1 | 3.6 | 0.6 | 126.1 |
| ENSG00000092969 | Poly 2 | tgfb2 | 3.6 | 0.8 | 247.2 |
| ENSG00000227036 | Poly 2 | linc00511 | 3.7 | 0.3 | 38.9 |
| ENSG00000146006 | Exp 2 | lrrtm2 | 3.7 | 0.0 | -80.5 |
| ENSG00000225205 | Exp 2 |  | 3.7 | 0.1 | -42.3 |
| ENSG00000204941 | Linear | psg5 | 3.7 | 1.0 | 93.5 |
| ENSG00000135245 | Exp 3 | hilpda | 3.7 | 0.7 | 69.3 |
| ENSG00000106511 | Exp 2 | meox2 | 3.7 | 0.5 | -32.5 |
| ENSG00000019549 | Power | snai2 | 3.7 | 0.8 | 152.4 |
| ENSG00000178977 | Linear | linc00324 | 3.7 | 0.1 | -47.0 |
| ENSG00000141314 | Exp 2 | rhbdl3 | 3.7 | 0.0 | -93.9 |
| ENSG00000262136 | Poly 2 |  | 3.7 | 0.6 | -130.5 |
| ENSG00000222047 | Linear | c10orf55 | 3.7 | 0.9 | -99.1 |
| ENSG00000213082 | Linear |  | 3.7 | 0.8 | -1.6 |
| ENSG00000156103 | Exp 2 | mmp16 | 3.7 | 1.0 | 158.4 |
| ENSG00000106714 | Exp 2 | cntnap3 | 3.8 | 0.1 | -85.1 |
| ENSG00000126785 | Linear | rhoj | 3.8 | 0.2 | -53.0 |
| ENSG00000101298 | Exp 3 | snph | 3.8 | 0.8 | -4.8 |
| ENSG00000178860 | Exp 2 | msc | 3.8 | 1.0 | 169.9 |
| ENSG00000158856 | Exp 2 | dmtn | 3.8 | 0.8 | 82.2 |
| ENSG00000162711 | Linear | nlrp3 | 3.8 | 0.2 | -34.0 |
| ENSG00000120217 | Poly 2 | cd274 | 3.8 | 0.9 | 124.6 |
| ENSG00000050344 | Power | nfe2l3 | 3.8 | 0.6 | 149.8 |
| ENSG00000116106 | Power | epha4 | 3.8 | 1.0 | 33.7 |
| ENSG00000100314 | Linear | cabp7 | 3.8 | 0.2 | -77.0 |
| ENSG00000154734 | Poly 2 | adamts1 | 3.8 | 0.9 | 245.9 |
| ENSG00000118508 | Exp 2 | rab32 | 3.8 | 0.3 | 239.5 |
| ENSG00000273486 | Exp 2 |  | 3.8 | 0.2 | -115.7 |
| ENSG00000106823 | Exp 2 | ecm2 | 3.8 | 0.9 | 48.5 |
| ENSG00000123358 | Exp 2 | nr4a1 | 3.8 | 0.4 | 86.4 |
| ENSG00000183807 | Exp 2 | fam162b | 3.8 | 0.8 | -119.0 |
| ENSG00000168405 | Linear |  | 3.8 | 0.3 | 17.1 |
| ENSG00000203780 | Linear | fank1 | 3.9 | 0.0 | -83.6 |
| ENSG00000106366 | Poly 2 | serpine1 | 3.9 | 0.4 | 402.9 |
| ENSG00000093217 | Exp 2 | xylb | 3.9 | 0.9 | -13.4 |
| ENSG00000138741 | Linear | trpc3 | 3.9 | 0.2 | -14.8 |
| ENSG00000248599 | Exp 2 | flj42969 | 3.9 | 0.8 | -178.0 |
| ENSG00000027869 | Exp 2 | sh2d2a | 3.9 | 0.0 | -99.3 |
| ENSG00000175274 | Poly 2 | tp53i11 | 3.9 | 0.6 | -135.0 |
| ENSG00000255014 | Linear |  | 4.0 | 0.7 | -193.3 |
| ENSG00000171488 | Linear | lrrc8c | 4.0 | 0.5 | 49.2 |
| ENSG00000165323 | Exp 3 | fat3 | 4.0 | 0.7 | 14.4 |
| ENSG00000233532 | Poly 2 |  | 4.0 | 0.7 | 56.7 |
| ENSG00000008394 | Exp 2 | mgst1 | 4.0 | 0.7 | 32.7 |
| ENSG00000279968 | Linear | gvqw2 | 4.0 | 0.2 | -111.0 |
| ENSG00000189212 | Exp 3 |  | 4.0 | 0.5 | 87.1 |
| ENSG00000170442 | Linear | krt86 | 4.1 | 0.4 | -47.3 |
| ENSG00000163827 | Poly 2 | lrrc2 | 4.1 | 0.0 | -33.6 |
| ENSG00000150556 | Linear | lypd6b | 4.1 | 0.3 | 8.5 |
| ENSG00000188747 | Exp 2 | noxa1 | 4.1 | 0.4 | -113.2 |
| ENSG00000205517 | Poly 2 | rgl3 | 4.1 | 0.5 | 56.7 |
| ENSG00000180914 | Poly 2 | oxtr | 4.1 | 0.8 | 193.7 |
| ENSG00000125122 | Linear | lrrc29 | 4.1 | 0.3 | -52.8 |
| ENSG00000169064 | Exp 2 | zbbx | 4.1 | 0.6 | -133.1 |
| ENSG00000196220 | Exp 3 | srgap3 | 4.1 | 0.3 | -109.4 |
| ENSG00000135318 | Poly 2 | nt5e | 4.1 | 0.2 | 194.0 |
| ENSG00000169860 | Exp 2 | p2ry1 | 4.1 | 0.8 | -5.2 |
| ENSG00000132470 | Exp 2 | itgb4 | 4.1 | 1.0 | 85.8 |
| ENSG00000069812 | Exp 2 | hes2 | 4.1 | 0.1 | -152.6 |
| ENSG00000163710 | Linear | pcolce2 | 4.1 | 0.2 | 9.9 |
| ENSG00000183378 | Linear | ovch2 | 4.1 | 0.8 | -117.0 |
| ENSG00000164161 | Exp 2 | hhip | 4.2 | 0.8 | 90.1 |
| ENSG00000273568 | Linear |  | 4.2 | 0.8 | -46.3 |
| ENSG00000254602 | Linear |  | 4.2 | 0.7 | -27.6 |
| ENSG00000092096 | Exp 3 | slc22a17 | 4.2 | 0.9 | -39.2 |
| ENSG00000140678 | Poly 2 | itgax | 4.2 | 0.1 | -176.7 |
| ENSG00000137819 | Poly 2 | paqr5 | 4.2 | 0.2 | 41.3 |
| ENSG00000232774 | Poly 2 | flj22447 | 4.2 | 0.8 | -71.0 |
| ENSG00000163017 | Exp 2 | actg2 | 4.2 | 0.7 | 190.8 |
| ENSG00000243414 | Exp 2 | ticam2 | 4.2 | 0.7 | -58.0 |
| ENSG00000253746 | Exp 2 |  | 4.2 | 0.2 | -140.4 |
| ENSG00000130600 | Linear | h19 | 4.3 | 0.7 | -6.7 |
| ENSG00000183145 | Poly 2 | ripply3 | 4.3 | 0.8 | -0.3 |
| ENSG00000244165 | Linear | p2ry11 | 4.3 | 0.3 | -6.4 |
| ENSG00000134917 | Power | adamts8 | 4.3 | 0.9 | -124.9 |
| ENSG00000139973 | Linear | syt16 | 4.3 | 1.0 | 6.2 |
| ENSG00000133808 | Linear | micalcl | 4.3 | 0.4 | -53.9 |
| ENSG00000188517 | Exp 2 | col25a1 | 4.3 | 0.7 | 37.5 |
| ENSG00000279838 | Linear |  | 4.4 | 0.1 | -83.0 |
| ENSG00000128805 | Exp 3 | arhgap22 | 4.4 | 0.9 | 28.6 |
| ENSG00000268089 | Exp 2 | gabrq | 4.4 | 0.4 | -54.9 |
| ENSG00000205221 | Exp 2 | vit | 4.4 | 0.3 | -81.5 |
| ENSG00000240032 | Linear |  | 4.4 | 0.1 | -42.4 |
| ENSG00000176055 | Exp 3 | mblac2 | 4.4 | 0.6 | 52.3 |
| ENSG00000233117 | Poly 2 |  | 4.4 | 0.9 | 18.6 |
| ENSG00000111834 | Exp 2 | rsph4a | 4.4 | 0.1 | -145.2 |
| ENSG00000139946 | Exp 2 | peli2 | 4.5 | 0.9 | -68.7 |
| ENSG00000124225 | Exp 3 | pmepa1 | 4.5 | 0.1 | 120.6 |
| ENSG00000182168 | Exp 2 | unc5c | 4.5 | 0.9 | -25.2 |
| ENSG00000221100 | Linear |  | 4.5 | 0.0 | -134.5 |
| ENSG00000234231 | Linear |  | 4.5 | 0.8 | -10.9 |
| ENSG00000152154 | Exp 3 | tmem178a | 4.5 | 0.6 | -7.5 |
| ENSG00000154736 | Poly 2 | adamts5 | 4.5 | 0.9 | 212.8 |
| ENSG00000273035 | Linear |  | 4.6 | 0.2 | -132.9 |
| ENSG00000204767 | Exp 2 | fam196b | 4.6 | 0.2 | -84.0 |
| ENSG00000224020 | Exp 2 | mir181a2hg | 4.6 | 0.6 | -55.6 |
| ENSG00000254332 | Linear |  | 4.6 | 0.3 | -78.9 |
| ENSG00000251361 | Linear |  | 4.6 | 0.1 | -167.5 |
| ENSG00000162004 | Exp 2 | ccdc78 | 4.6 | 0.5 | -60.6 |
| ENSG00000095397 | Exp 2 | whrn | 4.6 | 0.3 | -35.1 |
| ENSG00000152402 | Power | gucy1a2 | 4.6 | 0.6 | -74.6 |
| ENSG00000147485 | Poly 2 | pxdnl | 4.6 | 0.1 | -47.7 |
| ENSG00000233929 | Linear |  | 4.6 | 0.3 | -126.2 |
| ENSG00000272696 | Exp 2 |  | 4.6 | 0.1 | -121.4 |
| ENSG00000259728 | Poly 2 |  | 4.6 | 0.1 | -106.5 |
| ENSG00000262580 | Linear |  | 4.7 | 0.4 | -110.7 |
| ENSG00000232977 | Poly 2 | linc00327 | 4.7 | 0.5 | 82.2 |
| ENSG00000161955 | Poly 2 | tnfsf13 | 4.7 | 0.4 | -98.9 |
| ENSG00000131386 | Poly 2 | galnt15 | 4.7 | 0.3 | -101.6 |
| ENSG00000137225 | Power | capn11 | 4.7 | 0.7 | -199.5 |
| ENSG00000182667 | Linear | ntm | 4.7 | 0.6 | 13.9 |
| ENSG00000197084 | Power | lce1c | 4.7 | 0.0 | -168.9 |
| ENSG00000144834 | Power | tagln3 | 4.7 | 0.3 | -114.0 |
| ENSG00000110900 | Power | tspan11 | 4.7 | 0.7 | -171.8 |
| ENSG00000185669 | Exp 3 | snai3 | 4.7 | 0.9 | -122.1 |
| ENSG00000221890 | Poly 2 | nptxr | 4.8 | 0.5 | 46.3 |
| ENSG00000277778 | Linear | pgm5p2 | 4.8 | 0.4 | -41.1 |
| ENSG00000189057 | Power | fam111b | 4.8 | 0.4 | 183.0 |
| ENSG00000163898 | Power | liph | 4.8 | 0.2 | -106.6 |
| ENSG00000232445 | Power |  | 4.8 | 0.3 | -60.2 |
| ENSG00000197093 | Power | gal3st4 | 4.8 | 1.0 | -24.2 |
| ENSG00000075461 | Linear | cacng4 | 4.8 | 0.8 | 48.8 |
| ENSG00000272417 | Linear |  | 4.8 | 0.1 | -153.1 |
| ENSG00000205978 | Power | nynrin | 4.8 | 0.1 | 66.3 |
| ENSG00000136828 | Power | ralgps1 | 4.8 | 0.8 | -60.4 |
| ENSG00000138653 | Power | ndst4 | 4.8 | 0.6 | -71.0 |
| ENSG00000160323 | Power | adamts13 | 4.8 | 0.8 | -45.3 |
| ENSG00000179136 | Power | linc00670 | 4.8 | 0.8 | -23.9 |
| ENSG00000156265 | Power | map3k7cl | 4.8 | 0.8 | 133.8 |
| ENSG00000236711 | Power |  | 4.8 | 0.4 | -153.4 |
| ENSG00000139278 | Power | glipr1 | 4.8 | 0.5 | 258.1 |
| ENSG00000076344 | Power | rgs11 | 4.8 | 0.2 | -97.8 |
| ENSG00000266094 | Power | rassf5 | 4.8 | 0.4 | -27.7 |
| ENSG00000141052 | Power | myocd | 4.8 | 0.8 | 74.6 |
| ENSG00000102271 | Power | klhl4 | 4.8 | 0.5 | -50.4 |
| ENSG00000172602 | Power | rnd1 | 4.9 | 0.5 | -67.8 |
| ENSG00000247157 | Exp 3 | linc01252 | 4.9 | 0.9 | -164.1 |
| ENSG00000177191 | Power | b3gnt8 | 4.9 | 0.4 | -122.4 |
| ENSG00000087085 | Exp 3 | ache | 4.9 | 0.1 | -153.4 |
| ENSG00000172164 | Linear | sntb1 | 4.9 | 0.9 | 23.6 |
| ENSG00000226806 | Power | ac011893.3 | 4.9 | 0.1 | -142.4 |
| ENSG00000131149 | Power | gse1 | 4.9 | 0.7 | 197.4 |
| ENSG00000161835 | Power | grasp | 4.9 | 0.8 | -97.6 |
| ENSG00000164056 | Power | spry1 | 4.9 | 0.7 | 3.6 |
| ENSG00000164619 | Power | bmper | 4.9 | 1.0 | -41.0 |
| ENSG00000105855 | Power | itgb8 | 4.9 | 0.9 | 226.1 |
| ENSG00000164649 | Power | cdca7l | 4.9 | 0.1 | 216.3 |
| ENSG00000139329 | Power | lum | 4.9 | 0.6 | 237.1 |
| ENSG00000118596 | Poly 2 | slc16a7 | 4.9 | 0.1 | 171.2 |
| ENSG00000164266 | Linear | spink1 | 4.9 | 0.6 | -157.5 |
| ENSG00000114656 | Power | kiaa1257 | 4.9 | 0.4 | -197.2 |
| ENSG00000270177 | Power |  | 4.9 | 0.0 | -80.2 |
| ENSG00000253785 | Linear |  | 4.9 | 0.8 | -158.6 |
| ENSG00000250365 | Power | ctd-2213f21.2 | 4.9 | 0.0 | -141.2 |
| ENSG00000103888 | Power | cemip | 4.9 | 1.0 | 112.8 |
| ENSG00000178184 | Exp 3 | pard6g | 4.9 | 0.0 | -72.3 |
| ENSG00000176771 | Exp 2 | nckap5 | 4.9 | 0.4 | -43.6 |
| ENSG00000232472 | Power |  | 4.9 | 0.2 | -88.7 |
| ENSG00000254615 | Power |  | 4.9 | 0.7 | -49.0 |
| ENSG00000186603 | Exp 3 | hpdl | 4.9 | 1.0 | -115.3 |
| ENSG00000148680 | Power | htr7 | 4.9 | 0.1 | -84.2 |
| ENSG00000213542 | Power |  | 4.9 | 0.6 | -183.1 |
| ENSG00000238363 | Power | snora13 | 4.9 | 0.7 | -93.4 |
| ENSG00000140937 | Power | cdh11 | 4.9 | 0.9 | 257.3 |
| ENSG00000119227 | Power | pigz | 4.9 | 0.9 | -65.5 |
| ENSG00000271751 | Power |  | 4.9 | 0.0 | -168.1 |
| ENSG00000166816 | Exp 3 | ldhd | 4.9 | 0.2 | -90.5 |
| ENSG00000123977 | Power | daw1 | 4.9 | 1.0 | 15.6 |
| ENSG00000117152 | Power | rgs4 | 4.9 | 0.1 | 197.1 |
| ENSG00000265112 | Power | mir3153 | 4.9 | 0.0 | -52.5 |
| ENSG00000106633 | Power | gck | 4.9 | 0.2 | -113.9 |
| ENSG00000262468 | Linear | linc01569 | 4.9 | 0.4 | -144.6 |
| ENSG00000253660 | Power |  | 5.0 | 0.2 | -141.2 |
| ENSG00000261115 | Power | tmem178b | 5.0 | 0.9 | 59.3 |
| ENSG00000159251 | Power | actc1 | 5.0 | 0.9 | 275.3 |
| ENSG00000156463 | Power | sh3rf2 | 5.0 | 1.0 | 74.6 |
| ENSG00000261051 | Power |  | 5.0 | 0.1 | -26.9 |
| ENSG00000113319 | Power | rasgrf2 | 5.0 | 0.1 | -174.8 |
| ENSG00000203497 | Exp 2 |  | 5.0 | 0.7 | -61.2 |
| ENSG00000198910 | Exp 2 | l1cam | 5.0 | 0.8 | 188.3 |
| ENSG00000279673 | Power |  | 5.0 | 0.2 | -42.0 |
| ENSG00000165449 | Power | slc16a9 | 5.0 | 0.5 | -86.3 |

Supplementary Table 4: A list of genes and associated BMD outputs for low dose rate exposures.

| Probe Id | BMDS Model | Gene Symbols | BMD (Gy) | Fit P-Value | AIC |
| --- | --- | --- | --- | --- | --- |
| ENSG00000277048 | Poly 3 |  | 0.03 | 0.10 | 267.11 |
| ENSG00000159176 | Exp 5 | csrp1 | 0.05 | 0.79 | 284.47 |
| ENSG00000245532 | Poly 3 | neat1 | 0.21 | 0.12 | 311.23 |
| ENSG00000214753 | Poly 3 | hnrnpul2 | 0.22 | 0.12 | 167.35 |
| ENSG00000104177 | Hill | myef2 | 0.30 | 0.46 | 221.02 |
| ENSG00000124762 | Poly 3 | cdkn1a | 0.37 | 0.03 | 202.20 |
| ENSG00000054277 | Hill | opn3 | 0.40 | 0.85 | 120.47 |
| ENSG00000164938 | Linear | tp53inp1 | 0.43 | 0.54 | 160.04 |
| ENSG00000135679 | Linear | mdm2 | 0.54 | 0.31 | 281.73 |
| ENSG00000047346 | Hill | fam214a | 0.57 | 0.06 | 116.74 |
| ENSG00000197837 | Poly 2 | hist4h4 | 0.57 | 0.45 | 168.98 |
| ENSG00000138798 | Poly 2 | egf | 0.58 | 0.11 | 151.36 |
| ENSG00000119922 | Linear | ifit2 | 0.67 | 0.82 | 129.45 |
| ENSG00000119917 | Linear | ifit3 | 0.68 | 0.07 | 120.84 |
| ENSG00000130517 | Linear | pgpep1 | 0.72 | 0.46 | 96.21 |
| ENSG00000137628 | Linear | ddx60 | 0.75 | 0.20 | 171.57 |
| ENSG00000130707 | Poly 2 | ass1 | 0.91 | 0.34 | 213.23 |
| ENSG00000182240 | Linear | bace2 | 0.93 | 0.77 | 189.46 |
| ENSG00000163083 | Poly 2 | inhbb | 0.96 | 0.07 | 90.12 |
| ENSG00000043143 | Linear | jade2 | 0.97 | 0.29 | 160.28 |
| ENSG00000100027 | Linear | ypel1 | 1.03 | 0.36 | 81.93 |
| ENSG00000275379 | Poly 2 | hist1h3i | 1.07 | 0.78 | 240.89 |
| ENSG00000116991 | Poly 2 | sipa1l2 | 1.15 | 0.31 | 62.64 |
| ENSG00000113140 | Linear | sparc | 1.17 | 0.73 | 404.85 |
| ENSG00000114796 | Linear | klhl24 | 1.17 | 0.53 | 141.66 |
| ENSG00000162433 | Exp 2 | ak4 | 1.19 | 0.23 | 184.83 |
| ENSG00000161513 | Linear | fdxr | 1.22 | 0.29 | 138.42 |
| ENSG00000233521 | Power | linc01638 | 1.23 | 0.04 | 58.78 |
| ENSG00000178878 | Linear | apold1 | 1.25 | 0.21 | 123.51 |
| ENSG00000073464 | Linear | clcn4 | 1.27 | 0.19 | 75.36 |
| ENSG00000164463 | Linear | crebrf | 1.30 | 0.37 | 95.70 |
| ENSG00000175352 | Linear | nrip3 | 1.30 | 0.03 | 116.88 |
| ENSG00000123213 | Linear | nln | 1.35 | 0.59 | 193.16 |
| ENSG00000153029 | Linear | mr1 | 1.43 | 0.34 | 145.21 |
| ENSG00000204386 | Linear | neu1 | 1.46 | 0.03 | 210.73 |
| ENSG00000060718 | Exp 5 | col11a1 | 1.48 | 0.24 | 185.41 |
| ENSG00000151892 | Linear | gfra1 | 1.52 | 0.54 | 253.02 |
| ENSG00000048392 | Linear | rrm2b | 1.52 | 0.12 | 197.53 |
| ENSG00000145604 | Linear | skp2 | 1.54 | 0.66 | 238.06 |
| ENSG00000107562 | Power | cxcl12 | 1.66 | 0.25 | 78.43 |
| ENSG00000115129 | Linear | tp53i3 | 1.67 | 0.10 | 175.60 |
| ENSG00000146674 | Linear | igfbp3 | 1.70 | 0.25 | 307.24 |
| ENSG00000278637 | Poly 3 | hist1h4a | 1.71 | 0.57 | 124.58 |
| ENSG00000117394 | Exp 2 | slc2a1 | 1.72 | 0.13 | 245.35 |
| ENSG00000168672 | Linear | fam84b | 1.72 | 0.41 | 249.67 |
| ENSG00000099194 | Linear | scd | 1.73 | 0.21 | 251.39 |
| ENSG00000168542 | Linear | col3a1 | 1.80 | 0.48 | 359.05 |
| ENSG00000164331 | Linear | ankra2 | 1.80 | 0.05 | 109.29 |
| ENSG00000072571 | Linear | hmmr | 1.81 | 0.11 | 303.91 |
| ENSG00000107201 | Linear | ddx58 | 1.84 | 0.19 | 179.41 |
| ENSG00000198947 | Linear | dmd | 1.87 | 0.78 | 103.45 |
| ENSG00000153993 | Linear | sema3d | 1.93 | 0.58 | 171.32 |
| ENSG00000096872 | Linear | ift74 | 1.94 | 0.30 | 124.78 |
| ENSG00000152256 | Linear | pdk1 | 1.97 | 0.99 | 150.19 |
| ENSG00000185745 | Linear | ifit1 | 2.03 | 0.01 | 156.18 |
| ENSG00000145681 | Linear | hapln1 | 2.10 | 0.82 | 298.11 |
| ENSG00000145934 | Linear | tenm2 | 2.11 | 0.13 | 238.15 |
| ENSG00000154736 | Poly 3 | adamts5 | 2.12 | 0.26 | 194.97 |
| ENSG00000154678 | Linear | pde1c | 2.13 | 0.98 | 258.63 |
| ENSG00000112902 | Linear | sema5a | 2.18 | 0.46 | 193.15 |
| ENSG00000183688 | Linear | rflnb | 2.26 | 0.58 | 183.71 |
| ENSG00000107796 | Linear | acta2 | 2.28 | 0.26 | 333.40 |
| ENSG00000172986 | Power | gxylt2 | 2.31 | 0.44 | 69.25 |
| ENSG00000169432 | Linear | scn9a | 2.34 | 0.75 | 209.39 |
| ENSG00000151388 | Linear | adamts12 | 2.36 | 0.64 | 261.06 |
| ENSG00000179630 | Linear | lacc1 | 2.36 | 0.02 | 64.71 |
| ENSG00000135362 | Linear | prr5l | 2.45 | 0.95 | 129.40 |
| ENSG00000182752 | Linear | pappa | 2.47 | 0.12 | 107.63 |
| ENSG00000170153 | Power | rnf150 | 2.47 | 0.68 | 106.54 |
| ENSG00000122870 | Linear | bicc1 | 2.48 | 0.76 | 122.53 |
| ENSG00000103196 | Linear | crispld2 | 2.48 | 0.24 | 195.83 |
| ENSG00000072310 | Linear | srebf1 | 2.50 | 0.11 | 239.13 |
| ENSG00000111799 | Linear | col12a1 | 2.57 | 0.02 | 276.22 |
| ENSG00000039560 | Linear | rai14 | 2.59 | 0.20 | 280.19 |
| ENSG00000074410 | Linear | ca12 | 2.59 | 0.21 | 93.46 |
| ENSG00000137124 | Linear | aldh1b1 | 2.68 | 0.90 | 267.36 |
| ENSG00000164692 | Linear | col1a2 | 2.73 | 0.49 | 353.71 |
| ENSG00000164176 | Linear | edil3 | 2.73 | 0.94 | 369.34 |
| ENSG00000134285 | Linear | fkbp11 | 2.77 | 0.59 | 108.67 |
| ENSG00000170381 | Power | sema3e | 2.83 | 0.81 | 83.93 |
| ENSG00000091986 | Linear | ccdc80 | 2.87 | 0.43 | 382.10 |
| ENSG00000164125 | Linear | fam198b | 2.89 | 0.86 | 178.31 |
| ENSG00000021645 | Linear | nrxn3 | 2.90 | 0.54 | 185.39 |
| ENSG00000175745 | Linear | nr2f1 | 2.91 | 0.10 | 67.71 |
| ENSG00000134333 | Linear | ldha | 2.93 | 0.36 | 388.97 |
| ENSG00000064666 | Linear | cnn2 | 3.00 | 0.27 | 280.73 |
| ENSG00000041982 | Linear | tnc | 3.06 | 0.28 | 281.62 |
| ENSG00000066468 | Power | fgfr2 | 3.07 | 0.03 | 63.77 |
| ENSG00000101825 | Power | mxra5 | 3.08 | 0.36 | 152.74 |
| ENSG00000184347 | Linear | slit3 | 3.11 | 0.38 | 147.23 |
| ENSG00000178409 | Linear | bend3 | 3.12 | 0.25 | 101.36 |
| ENSG00000166106 | Linear | adamts15 | 3.13 | 0.73 | 163.03 |
| ENSG00000138944 | Linear | kiaa1644 | 3.16 | 0.61 | 60.99 |
| ENSG00000157483 | Power | myo1e | 3.18 | 0.04 | 213.86 |
| ENSG00000185483 | Power | ror1 | 3.54 | 0.69 | 100.97 |
| ENSG00000154734 | Power | adamts1 | 4.04 | 0.26 | 244.88 |
| ENSG00000169851 | Power | pcdh7 | 4.83 | 0.73 | 172.79 |

Supplementary Table 5: Genes exhibiting non-linear biphasic responses and associated cluster ID and BMD median values for HDR exposures.

| ENTREZID | SYMBOL | clusterID | BMDS.Model | BMD (Gy) | fitPValue | AIC | D0.01 | D0.05 | D0.25 | D0.5 | D2 | D5 |
| --- | --- | --- | --- | --- | --- | --- | --- | --- | --- | --- | --- | --- |
| 4621 | MYH3 | 1 | Poly 2 | 1.1 | 0.5 | 86.6 | 0.12 | 0.23 | 0.35 | 0.27 | 0.54 | -0.13 |
| 2152 | F3 | 1 | Poly 2 | 0.6 | 1 | 160.5 | 0.02 | -0.02 | 0.12 | 0.26 | 0.60 | -0.04 |
| 3553 | IL1B | 1 | Poly 2 | 0.7 | 0.9 | -39.6 | 0.06 | 0.03 | 0.19 | 0.19 | 0.48 | 0.19 |
| 64101 | LRRC4 | 1 | Poly 2 | 0.7 | 0.1 | -51 | 0.22 | 0.21 | 0.34 | 0.18 | 0.49 | 0.53 |
| 1847 | DUSP5 | 1 | Poly 2 | 0.4 | 0.8 | 56 | 0.04 | 0.03 | 0.12 | 0.16 | 0.57 | 0.31 |
| 1848 | DUSP6 | 1 | Poly 2 | 0.7 | 0.2 | 60.9 | 0.23 | 0.13 | 0.21 | 0.33 | 0.54 | 0.14 |
| 29943 | PADI1 | 1 | Poly 2 | 0.7 | 0.3 | -98 | 0.08 | -0.22 | 0.00 | 0.17 | 0.41 | -0.08 |
| 84675 | TRIM55 | 1 | Poly 2 | 0.7 | 0.8 | 31.4 | 0.02 | 0.00 | 0.10 | 0.30 | 0.47 | 0.31 |
| 27063 | ANKRD1 | 1 | Poly 2 | 0.7 | 0.8 | 336.3 | -0.12 | 0.01 | 0.11 | 0.34 | 0.68 | 0.00 |
| 1006 | CDH8 | 1 | Poly 2 | 0.6 | 0.4 | -121.8 | 0.02 | -0.03 | 0.18 | 0.04 | 0.38 | 0.01 |
| 5801 | PTPRR | 1 | Poly 2 | 0.5 | 0.7 | 11.9 | 0.09 | 0.12 | 0.13 | 0.34 | 0.48 | -0.09 |
| 3570 | IL6R | 1 | Poly 2 | 0.5 | 0.5 | -13.5 | 0.12 | 0.14 | 0.15 | 0.24 | 0.50 | 0.31 |
| 1493 | CTLA4 | 1 | Poly 2 | 0.7 | 0.1 | -154.1 | 0.32 | 0.10 | 0.32 | 0.34 | 0.46 | 0.11 |
| 26585 | GREM1 | 1 | Poly 2 | 0.6 | 1 | 294.4 | -0.05 | -0.03 | 0.14 | 0.22 | 0.62 | 0.14 |
| 51129 | ANGPTL4 | 1 | Poly 2 | 0.3 | 0.8 | 66.5 | 0.19 | 0.11 | 0.32 | 0.49 | 0.76 | 0.27 |
| 165904 | XIRP1 | 1 | Exp 4 | 0.5 | 0.8 | -44.9 | 0.22 | 0.18 | 0.33 | 0.33 | 0.50 | 0.52 |
| 377007 | KLHL30 | 1 | Exp 4 | 0.6 | 0.2 | -86.2 | 0.19 | 0.16 | 0.09 | 0.26 | 0.41 | 0.40 |
| 154 | ADRB2 | 1 | Poly 2 | 0.9 | 0.1 | -7.7 | 0.22 | 0.28 | 0.31 | 0.31 | 0.47 | 0.30 |
| 8988 | HSPB3 | 1 | Poly 2 | 0.5 | 0.3 | -55.9 | -0.01 | 0.01 | 0.04 | 0.38 | 0.39 | 0.11 |
| 3576 | CXCL8 | 1 | Poly 2 | 0.6 | 0.8 | 100 | 0.02 | 0.17 | 0.13 | 0.44 | 0.74 | 0.37 |
| 91683 | SYT12 | 1 | Poly 2 | 0.7 | 0.9 | 33.7 | 0.08 | 0.00 | 0.18 | 0.22 | 0.48 | 0.27 |
| 27129 | HSPB7 | 1 | Poly 2 | 0.8 | 0.1 | -101.1 | 0.18 | 0.11 | 0.10 | 0.12 | 0.40 | 0.25 |
| 56892 | C8orf4 | 1 | Poly 2 | 0.5 | 1 | 49.4 | 0.03 | 0.09 | 0.22 | 0.35 | 0.73 | 0.43 |
| 25834 | MGAT4C | 1 | Poly 2 | 0.8 | 0.1 | -178.6 | 0.17 | 0.18 | 0.10 | 0.20 | 0.40 | 0.10 |
| 6000 | RGS7 | 1 | Poly 2 | 1.1 | 0.9 | -31.4 | 0.07 | 0.04 | 0.05 | 0.12 | 0.42 | -0.05 |
| 339512 | CCDC190 | 1 | Poly 2 | 0.5 | 0.8 | 16.5 | 0.05 | 0.02 | 0.13 | 0.27 | 0.47 | 0.14 |
| 79366 | HMGN5 | 1 | Poly 3 | 2.1 | 0 | -25.3 | 0.10 | 0.44 | 0.22 | -0.01 | 0.55 | 0.27 |
| NA | NA | 1 | Poly 2 | 0.6 | 0.8 | -52.4 | 0.02 | -0.06 | 0.02 | 0.18 | 0.48 | 0.11 |
| NA | NA | 1 | Poly 2 | 0.7 | 0 | -117.8 | 0.11 | 0.03 | 0.23 | 0.02 | 0.45 | 0.28 |
| 101101772 | LINC00601 | 1 | Hill | 0.3 | 0.4 | -165.8 | 0.22 | 0.04 | 0.20 | 0.32 | 0.40 | 0.48 |
| NA | NA | 1 | Poly 2 | 1.1 | 0.1 | -59.8 | 0.15 | 0.19 | 0.05 | 0.09 | 0.38 | -0.01 |
| NA | NA | 1 | Poly 2 | 0.7 | 0.9 | -60 | 0.01 | 0.06 | 0.04 | 0.17 | 0.38 | 0.26 |
| NA | NA | 1 | Poly 2 | 0.9 | 0.1 | -176.3 | 0.13 | 0.25 | 0.11 | 0.29 | 0.41 | 0.22 |
| NA | NA | 1 | Poly 2 | 0.6 | 0.1 | -195.4 | 0.28 | 0.16 | 0.09 | 0.29 | 0.45 | 0.11 |
| NA | NA | 1 | Poly 2 | 1 | 0 | -48.1 | 0.15 | 0.31 | 0.15 | 0.25 | 0.42 | 0.25 |
| NA | NA | 1 | Poly 2 | 0.8 | 0.4 | -151.6 | 0.11 | 0.13 | 0.11 | 0.12 | 0.40 | 0.32 |
| NA | NA | 1 | Exp 4 | 0 | 0.1 | -167 | 0.17 | 0.18 | 0.16 | 0.41 | 0.32 | 0.23 |
| NA | NA | 1 | Poly 2 | 0.7 | 0.8 | -1.9 | -0.06 | 0.07 | -0.01 | 0.22 | 0.53 | 0.27 |
| NA | NA | 1 | Poly 2 | 0.2 | 0.9 | -3.9 | 0.00 | 0.04 | 0.14 | 0.25 | 0.59 | -0.09 |
| NA | NA | 1 | Poly 2 | 0.5 | 0 | -162.5 | 0.22 | 0.10 | 0.34 | 0.29 | 0.43 | 0.21 |
| 338758 | LINC00936 | 1 | Poly 2 | 0.4 | 0.2 | -42.2 | 0.12 | 0.19 | 0.16 | 0.17 | 0.63 | 0.21 |
| NA | NA | 1 | Poly 2 | 0.6 | 0.5 | -145.5 | 0.12 | 0.14 | 0.13 | 0.11 | 0.40 | 0.25 |
| 9734 | HDAC9 | 1 | NA | NA | NA | NA | 0.04 | 0.05 | 0.12 | 0.16 | 0.44 | 0.23 |
| 4254 | KITLG | 1 | NA | NA | NA | NA | -0.11 | -0.03 | 0.03 | 0.09 | 0.38 | -0.01 |
| 1906 | EDN1 | 1 | NA | NA | NA | NA | 0.03 | 0.09 | 0.15 | 0.34 | 0.51 | -0.41 |
| 5155 | PDGFB | 1 | NA | NA | NA | NA | 0.02 | 0.00 | 0.15 | 0.19 | 0.41 | 0.16 |
| 51260 | PBDC1 | 1 | NA | NA | NA | NA | -0.16 | 0.50 | 0.26 | 0.01 | 0.22 | 0.14 |
| 2321 | FLT1 | 1 | NA | NA | NA | NA | -0.04 | -0.02 | 0.15 | 0.23 | 0.43 | -0.13 |
| 84935 | MEDAG | 1 | NA | NA | NA | NA | 0.00 | 0.10 | 0.20 | 0.29 | 0.42 | -0.22 |
| 22943 | DKK1 | 1 | NA | NA | NA | NA | 0.10 | 0.11 | 0.16 | 0.24 | 0.38 | -0.07 |
| 4739 | NEDD9 | 1 | NA | NA | NA | NA | 0.12 | 0.10 | 0.20 | 0.27 | 0.51 | 0.09 |
| 157506 | RDH10 | 1 | NA | NA | NA | NA | -0.05 | -0.02 | 0.12 | 0.19 | 0.54 | 0.15 |
| 3181 | HNRNPA2B1 | 1 | NA | NA | NA | NA | 0.00 | 0.58 | 0.45 | -0.14 | 0.31 | 0.29 |
| 65109 | UPF3B | 1 | NA | NA | NA | NA | -0.31 | 0.44 | 0.12 | -0.14 | 0.30 | 0.19 |
| 84081 | NSRP1 | 1 | NA | NA | NA | NA | -0.17 | 0.57 | 0.28 | -0.10 | 0.32 | 0.17 |
| 9590 | AKAP12 | 1 | NA | NA | NA | NA | 0.11 | 0.21 | 0.31 | 0.22 | 0.39 | -0.01 |
| 10763 | NES | 1 | NA | NA | NA | NA | 0.15 | 0.34 | 0.36 | 0.21 | 0.39 | -0.12 |
| 83857 | TMTC1 | 1 | NA | NA | NA | NA | 0.20 | 0.13 | 0.14 | 0.40 | 0.28 | 0.22 |
| 4008 | LMO7 | 1 | NA | NA | NA | NA | 0.03 | 0.10 | 0.15 | 0.13 | 0.40 | 0.34 |
| 10253 | SPRY2 | 1 | NA | NA | NA | NA | 0.11 | 0.19 | 0.27 | 0.20 | 0.46 | 0.42 |
| 54843 | SYTL2 | 1 | NA | NA | NA | NA | -0.05 | 0.01 | 0.04 | 0.15 | 0.41 | 0.22 |
| 8482 | SEMA7A | 1 | NA | NA | NA | NA | 0.02 | -0.01 | 0.10 | 0.06 | 0.42 | 0.22 |
| 196463 | PLBD2 | 1 | NA | NA | NA | NA | 0.15 | 0.48 | 0.24 | 0.14 | 0.13 | -0.02 |
| 130940 | CCDC148 | 1 | NA | NA | NA | NA | -0.02 | 0.15 | 0.07 | 0.19 | 0.39 | 0.36 |
| 114907 | FBXO32 | 1 | NA | NA | NA | NA | -0.01 | 0.03 | 0.25 | 0.25 | 0.47 | 0.35 |
| 9669 | EIF5B | 1 | NA | NA | NA | NA | -0.01 | 0.62 | 0.43 | -0.13 | 0.20 | 0.06 |
| 146206 | RLTPR | 1 | NA | NA | NA | NA | 0.20 | 0.17 | 0.26 | 0.14 | 0.43 | 0.41 |
| 91624 | NEXN | 1 | NA | NA | NA | NA | -0.24 | 0.45 | 0.26 | -0.06 | 0.41 | -0.19 |
| 2919 | CXCL1 | 1 | NA | NA | NA | NA | 0.03 | -0.05 | 0.08 | 0.14 | 0.42 | 0.13 |
| 220213 | OTUD1 | 1 | NA | NA | NA | NA | 0.10 | 0.14 | 0.20 | 0.04 | 0.47 | 0.04 |
| 3575 | IL7R | 1 | NA | NA | NA | NA | -0.07 | 0.03 | 0.07 | 0.24 | 0.46 | -0.08 |
| 222166 | MTURN | 1 | NA | NA | NA | NA | -0.02 | 0.03 | 0.01 | 0.17 | 0.46 | 0.29 |
| 23764 | MAFF | 1 | NA | NA | NA | NA | 0.03 | 0.11 | 0.11 | 0.26 | 0.38 | -0.07 |
| 26052 | DNM3 | 1 | NA | NA | NA | NA | -0.05 | 0.07 | 0.15 | 0.16 | 0.40 | 0.10 |
| NA | NA | 1 | NA | NA | NA | NA | 0.15 | 0.13 | 0.13 | 0.18 | 0.41 | 0.27 |
| 677807 | SNORA22 | 1 | NA | NA | NA | NA | 0.39 | 0.37 | 0.10 | 0.22 | 0.38 | 0.16 |
| NA | NA | 1 | NA | NA | NA | NA | 0.16 | 0.38 | 0.31 | 0.24 | 0.20 | 0.20 |
| NA | NA | 1 | NA | NA | NA | NA | -0.14 | 0.68 | 0.31 | -0.14 | 0.67 | -0.14 |
| 414245 | DNAJC9-AS1 | 1 | NA | NA | NA | NA | 0.16 | 0.10 | -0.03 | 0.22 | 0.39 | 0.19 |
| 677767 | SCARNA7 | 1 | NA | NA | NA | NA | 0.09 | 0.43 | 0.08 | -0.17 | 0.22 | 0.12 |
| NA | NA | 1 | NA | NA | NA | NA | 0.15 | 0.06 | 0.18 | 0.10 | 0.38 | 0.27 |
| NA | NA | 1 | NA | NA | NA | NA | 0.03 | 0.16 | 0.08 | 0.01 | 0.46 | 0.02 |
| NA | NA | 1 | NA | NA | NA | NA | 0.14 | 0.23 | 0.12 | -0.10 | 0.43 | 0.20 |
| NA | NA | 1 | NA | NA | NA | NA | -0.02 | -0.18 | 0.06 | -0.01 | 0.38 | -0.03 |
| 100506394 | GAS6-AS2 | 1 | NA | NA | NA | NA | -0.01 | 0.03 | 0.06 | 0.19 | 0.45 | 0.18 |
| NA | NA | 1 | NA | NA | NA | NA | 0.03 | 0.14 | 0.19 | 0.10 | 0.36 | 0.38 |
| NA | NA | 1 | NA | NA | NA | NA | 0.16 | 0.21 | 0.20 | -0.03 | 0.39 | 0.22 |
| NA | NA | 1 | NA | NA | NA | NA | -0.07 | 0.01 | 0.10 | -0.11 | 0.47 | 0.14 |
| NA | NA | 1 | NA | NA | NA | NA | -0.35 | 1.10 | 0.81 | 0.12 | 1.08 | -0.36 |
| NA | NA | 1 | NA | NA | NA | NA | 0.06 | 0.12 | 0.16 | 0.27 | 0.48 | 0.19 |
| 8913 | CACNA1G | 2 | Exp 2 | 3.1 | 0.4 | -132.7 | 0.19 | 0.14 | 0.09 | 0.04 | 0.17 | 0.40 |
| 4065 | LY75 | 2 | Exp 2 | 3.4 | 0.1 | -149.6 | 0.17 | 0.20 | 0.19 | 0.01 | 0.17 | 0.40 |
| 22924 | MAPRE3 | 2 | Poly 3 | 0.5 | 0 | -31.8 | 0.30 | 0.08 | 0.14 | -0.15 | 0.06 | 0.54 |
| 25861 | DFNB31 | 2 | Exp 2 | 4.6 | 0.3 | -35.1 | 0.30 | 0.17 | 0.17 | 0.09 | 0.18 | 0.43 |
| 638 | BIK | 2 | Linear | 2.2 | 0.7 | -89.1 | 0.16 | 0.18 | 0.13 | 0.22 | 0.11 | 0.49 |
| 345895 | RSPH4A | 2 | Exp 2 | 4.4 | 0.1 | -145.2 | 0.30 | 0.14 | 0.17 | 0.25 | 0.07 | 0.43 |
| 80235 | PIGZ | 2 | Power | 4.9 | 0.9 | -65.5 | 0.25 | 0.10 | 0.20 | 0.07 | 0.12 | 0.43 |
| 26231 | LRRC29 | 2 | Linear | 4.1 | 0.3 | -52.8 | 0.17 | 0.24 | 0.06 | 0.10 | -0.01 | 0.46 |
| 283120 | H19 | 2 | Linear | 4.3 | 0.7 | -6.7 | 0.19 | 0.15 | 0.20 | 0.06 | 0.32 | 0.42 |
| 23199 | GSE1 | 2 | Power | 4.9 | 0.7 | 197.4 | 0.39 | -0.05 | 0.18 | -0.05 | -0.04 | 0.65 |
| 9053 | MAP7 | 2 | Linear | 3.1 | 0.2 | -9.2 | 0.21 | 0.26 | 0.26 | 0.09 | 0.32 | 0.49 |
| 64699 | TMPRSS3 | 2 | Linear | 3.2 | 0.1 | -154.1 | 0.22 | 0.05 | 0.13 | 0.34 | 0.22 | 0.42 |
| 160622 | GRASP | 2 | Power | 4.9 | 0.8 | -97.6 | 0.19 | 0.15 | 0.05 | 0.16 | 0.10 | 0.47 |
| 8741 | TNFSF13 | 2 | Poly 2 | 4.7 | 0.4 | -98.9 | 0.18 | 0.24 | 0.16 | 0.03 | -0.09 | 0.40 |
| 197257 | LDHD | 2 | Exp 3 | 4.9 | 0.2 | -90.5 | 0.29 | 0.10 | 0.05 | 0.09 | 0.02 | 0.43 |
| 284029 | LINC00324 | 2 | Linear | 3.7 | 0.1 | -47 | 0.11 | 0.21 | 0.12 | 0.20 | 0.23 | 0.38 |
| 340061 | TMEM173 | 2 | Exp 2 | 3.4 | 0.7 | 133.7 | 0.30 | 0.09 | 0.21 | 0.05 | 0.27 | 0.57 |
| 79690 | GAL3ST4 | 2 | Power | 4.8 | 1 | -24.2 | 0.22 | 0.19 | 0.16 | 0.09 | 0.04 | 0.61 |
| 6693;105369261 | SPN;LOC105369261 | 2 | Exp 2 | 2.3 | 0.6 | 54.9 | 0.28 | 0.16 | 0.24 | 0.08 | 0.34 | 0.73 |
| 57016 | AKR1B10 | 2 | Exp 2 | 2.2 | 0.2 | -185.8 | 0.17 | 0.19 | 0.28 | 0.25 | 0.26 | 0.58 |
| 677840 | SNORA71D | 2 | Hill | 0 | 0 | 56.2 | 0.66 | 0.28 | 0.15 | 0.26 | -0.03 | 0.30 |
| NA | NA | 2 | Exp 2 | 5 | 0.7 | -61.2 | 0.26 | 0.22 | 0.14 | 0.17 | 0.20 | 0.42 |
| 677833 | SNORA54 | 2 | Hill | 0 | 0.1 | 103.4 | 0.51 | 0.09 | -0.15 | 0.05 | -0.11 | 0.48 |
| NA | NA | 2 | Hill | 0 | 0 | -66 | 0.57 | 0.61 | 0.09 | 0.30 | 0.40 | 0.16 |
| 342666 | LRRC37A11P | 2 | Exp 2 | 3.2 | 0 | -144.5 | 0.26 | -0.02 | 0.12 | 0.05 | 0.15 | 0.40 |
| 23467 | NPTXR | 2 | Poly 2 | 4.8 | 0.5 | 46.3 | 0.29 | 0.05 | 0.14 | -0.10 | -0.02 | 0.47 |
| NA | NA | 2 | Hill | 0 | 0 | -149.2 | 0.43 | 0.30 | 0.27 | 0.21 | 0.42 | 0.27 |
| NA | NA | 2 | Hill | 0 | 0.4 | -198.8 | 0.40 | 0.24 | 0.18 | 0.26 | 0.10 | 0.21 |
| 26860 | RNU1-13P | 2 | Hill | 0 | 0.2 | -73.9 | 0.48 | 0.27 | 0.03 | 0.08 | 0.23 | 0.11 |
| 60489 | APOBEC3G | 2 | Linear | 1.5 | 0.1 | -44.5 | 0.19 | 0.33 | 0.23 | 0.25 | 0.44 | 0.73 |
| NA | NA | 2 | Linear | 4.7 | 0.4 | -110.7 | 0.24 | 0.17 | 0.27 | 0.13 | 0.30 | 0.39 |
| 83593 | RASSF5 | 2 | Power | 4.8 | 0.4 | -27.7 | 0.15 | 0.18 | 0.13 | 0.23 | 0.13 | 0.43 |
| NA | NA | 2 | Hill | 0 | 0.3 | -190.9 | 0.15 | 0.20 | 0.28 | 0.19 | 0.28 | 0.44 |
| NA | NA | 2 | Exp 2 | 4.6 | 0.1 | -121.4 | 0.21 | 0.20 | 0.23 | 0.17 | 0.17 | 0.38 |
| 57787 | MARK4 | 2 | NA | NA | NA | NA | 0.36 | -0.02 | 0.17 | -0.14 | -0.10 | 0.50 |
| 26993 | AKAP8L | 2 | NA | NA | NA | NA | 0.10 | 0.26 | 0.11 | 0.08 | 0.22 | 0.38 |
| 2896 | GRN | 2 | NA | NA | NA | NA | 0.42 | 0.22 | 0.33 | 0.06 | 0.02 | 0.44 |
| 22974 | TPX2 | 2 | NA | NA | NA | NA | 0.28 | 0.06 | 0.12 | -0.02 | -0.01 | 0.46 |
| 6548 | SLC9A1 | 2 | NA | NA | NA | NA | 0.49 | 0.22 | 0.25 | -0.11 | -0.15 | 0.37 |
| 3189 | HNRNPH3 | 2 | NA | NA | NA | NA | 0.31 | 0.42 | 0.54 | -0.28 | -0.06 | 0.23 |
| 57828 | CATSPERG | 2 | NA | NA | NA | NA | 0.20 | 0.23 | 0.25 | 0.18 | 0.17 | 0.41 |
| 994 | CDC25B | 2 | NA | NA | NA | NA | 0.24 | 0.06 | 0.07 | -0.06 | -0.10 | 0.43 |
| 8237 | USP11 | 2 | NA | NA | NA | NA | 0.16 | 0.16 | 0.22 | 0.05 | 0.20 | 0.43 |
| 83988 | NCALD | 2 | NA | NA | NA | NA | 0.28 | 0.45 | 0.30 | 0.21 | 0.17 | 0.26 |
| 1209 | CLPTM1 | 2 | NA | NA | NA | NA | 0.39 | 0.27 | 0.35 | -0.09 | -0.04 | 0.29 |
| 9149 | DYRK1B | 2 | NA | NA | NA | NA | 0.21 | 0.11 | 0.08 | -0.04 | 0.10 | 0.44 |
| 165 | AEBP1 | 2 | NA | NA | NA | NA | 0.44 | 0.24 | 0.36 | -0.03 | -0.08 | 0.16 |
| 5467 | PPARD | 2 | NA | NA | NA | NA | 0.39 | 0.22 | 0.23 | -0.05 | 0.00 | 0.25 |
| 1746 | DLX2 | 2 | NA | NA | NA | NA | 0.33 | 0.03 | 0.21 | -0.12 | -0.04 | 0.42 |
| 976 | ADGRE5 | 2 | NA | NA | NA | NA | 0.38 | 0.28 | 0.38 | 0.09 | 0.09 | 0.17 |
| 2354 | FOSB | 2 | NA | NA | NA | NA | 0.61 | 0.27 | 0.29 | 0.14 | 0.08 | 0.25 |
| 83596 | BCL2L12 | 2 | NA | NA | NA | NA | 0.40 | 0.19 | 0.41 | -0.08 | 0.03 | 0.32 |
| 5589 | PRKCSH | 2 | NA | NA | NA | NA | 0.53 | 0.39 | 0.45 | 0.02 | 0.02 | 0.14 |
| 10298 | PAK4 | 2 | NA | NA | NA | NA | 0.20 | 0.11 | 0.20 | -0.20 | -0.10 | 0.39 |
| 23558 | WBP2 | 2 | NA | NA | NA | NA | 0.42 | 0.35 | 0.38 | -0.03 | 0.03 | 0.60 |
| 55143 | CDCA8 | 2 | NA | NA | NA | NA | 0.21 | 0.19 | 0.20 | -0.04 | 0.02 | 0.45 |
| 27043 | PELP1 | 2 | NA | NA | NA | NA | 0.46 | 0.38 | 0.39 | -0.06 | -0.02 | 0.17 |
| 9919 | SEC16A | 2 | NA | NA | NA | NA | 0.41 | 0.07 | 0.33 | 0.01 | -0.12 | 0.24 |
| 3619 | INCENP | 2 | NA | NA | NA | NA | 0.32 | 0.18 | 0.19 | -0.09 | 0.04 | 0.57 |
| 81544 | GDPD5 | 2 | NA | NA | NA | NA | 0.34 | 0.14 | 0.28 | 0.11 | 0.12 | 0.50 |
| 9507 | ADAMTS4 | 2 | NA | NA | NA | NA | 0.21 | 0.23 | 0.22 | 0.02 | 0.19 | 0.55 |
| 9592 | IER2 | 2 | NA | NA | NA | NA | 0.45 | 0.45 | 0.46 | 0.16 | 0.23 | 0.17 |
| 84659 | RNASE7 | 2 | NA | NA | NA | NA | 0.17 | 0.23 | 0.11 | 0.20 | 0.24 | 0.44 |
| 89797 | NAV2 | 2 | NA | NA | NA | NA | 0.40 | 0.09 | 0.27 | 0.03 | -0.02 | 0.48 |
| 5347 | PLK1 | 2 | NA | NA | NA | NA | 0.34 | 0.16 | 0.25 | -0.14 | 0.00 | 0.61 |
| 4130 | MAP1A | 2 | NA | NA | NA | NA | 0.36 | 0.09 | 0.19 | -0.09 | 0.00 | 0.65 |
| 57555 | NLGN2 | 2 | NA | NA | NA | NA | 0.42 | 0.22 | 0.25 | -0.08 | -0.13 | 0.33 |
| 2353 | FOS | 2 | NA | NA | NA | NA | 0.47 | 0.48 | 0.47 | 0.31 | 0.50 | 0.77 |
| 26470 | SEZ6L2 | 2 | NA | NA | NA | NA | 0.40 | 0.08 | 0.32 | 0.02 | -0.02 | 0.39 |
| 6525 | SMTN | 2 | NA | NA | NA | NA | 0.27 | 0.14 | 0.23 | 0.09 | 0.19 | 0.43 |
| 1435 | CSF1 | 2 | NA | NA | NA | NA | 0.27 | 0.08 | 0.15 | 0.03 | 0.07 | 0.42 |
| 10614 | HEXIM1 | 2 | NA | NA | NA | NA | 0.34 | 0.27 | 0.38 | -0.11 | 0.00 | 0.36 |
| 9725 | TMEM63A | 2 | NA | NA | NA | NA | 0.13 | 0.17 | 0.22 | 0.04 | 0.12 | 0.42 |
| 26831 | RNU5A-1 | 2 | NA | NA | NA | NA | 0.39 | 0.11 | -0.04 | 0.11 | 0.09 | 0.25 |
| NA | NA | 2 | NA | NA | NA | NA | 1.09 | 0.28 | 0.03 | 0.28 | 0.22 | 0.26 |
| 26835 | RNU4-1 | 2 | NA | NA | NA | NA | 1.05 | 0.05 | -0.04 | 0.15 | 0.35 | 0.35 |
| 26834 | RNU4-2 | 2 | NA | NA | NA | NA | 1.13 | -0.02 | -0.04 | 0.11 | 0.35 | 0.40 |
| 100302743 | SNORA80B | 2 | NA | NA | NA | NA | 0.46 | -0.07 | -0.03 | 0.01 | -0.02 | 0.26 |
| 101954267 | RNVU1-15 | 2 | NA | NA | NA | NA | 0.39 | 0.16 | 0.08 | 0.07 | 0.05 | 0.01 |
| NA | NA | 2 | NA | NA | NA | NA | 0.42 | 0.23 | 0.18 | 0.15 | 0.26 | 0.18 |
| 677819 | SNORA37 | 2 | NA | NA | NA | NA | 0.40 | 0.23 | 0.06 | 0.13 | 0.04 | 0.08 |
| 114599 | SNORD15B | 2 | NA | NA | NA | NA | 0.67 | 0.12 | -0.19 | 0.32 | 0.31 | -0.05 |
| 692225 | SNORD94 | 2 | NA | NA | NA | NA | 0.51 | 0.11 | 0.04 | 0.28 | -0.07 | 0.34 |
| 677829 | SNORA49 | 2 | NA | NA | NA | NA | 0.91 | 0.32 | 0.07 | -0.02 | 0.17 | 0.27 |
| 692086 | SNORD17 | 2 | NA | NA | NA | NA | 0.95 | 0.13 | 0.13 | 0.21 | 0.37 | 0.44 |
| 677800 | SNORA12 | 2 | NA | NA | NA | NA | 0.50 | -0.05 | 0.03 | 0.06 | 0.06 | 0.45 |
| 664709 | HNRNPA1P10 | 2 | NA | NA | NA | NA | 0.38 | 0.19 | 0.29 | -0.01 | 0.19 | 0.14 |
| 26777 | SNORA71A | 2 | NA | NA | NA | NA | 0.92 | 0.28 | 0.11 | 0.03 | -0.02 | 0.26 |
| NA | NA | 2 | NA | NA | NA | NA | 0.23 | 0.17 | 0.23 | 0.31 | 0.18 | 0.41 |
| 101929626 | LOC101929626 | 2 | NA | NA | NA | NA | 0.18 | -0.01 | 0.21 | 0.37 | 0.10 | 0.39 |
| NA | NA | 2 | NA | NA | NA | NA | 0.32 | 0.15 | 0.35 | 0.40 | 0.25 | 0.34 |
| NA | NA | 2 | NA | NA | NA | NA | 0.36 | 0.24 | 0.22 | 0.19 | 0.23 | 0.39 |
| NA | NA | 2 | NA | NA | NA | NA | 0.10 | 0.22 | 0.31 | 0.31 | 0.19 | 0.41 |
| NA | NA | 2 | NA | NA | NA | NA | 0.25 | 0.37 | 0.32 | 0.28 | 0.15 | 0.40 |
| NA | NA | 2 | NA | NA | NA | NA | 0.39 | 0.17 | 0.14 | 0.09 | 0.10 | 0.12 |
| 677828 | SNORA47 | 2 | NA | NA | NA | NA | 0.44 | 0.34 | 0.22 | 0.10 | 0.12 | 0.31 |
| 692084 | SNORD13 | 2 | NA | NA | NA | NA | 0.71 | 0.26 | -0.03 | -0.31 | -0.10 | 0.39 |
| 105377105 | LOC105377105 | 2 | NA | NA | NA | NA | 0.41 | -0.02 | 0.10 | 0.08 | 0.13 | 0.22 |
| NA | NA | 2 | NA | NA | NA | NA | 0.34 | 0.27 | 0.31 | 0.36 | 0.21 | 0.38 |
| 984 | CDK11B | 2 | NA | NA | NA | NA | 0.25 | 0.46 | 0.39 | -0.15 | -0.05 | 0.20 |
| 677772 | SCARNA6 | 2 | NA | NA | NA | NA | 0.70 | 0.17 | 0.32 | 0.21 | 0.27 | 0.36 |
| 677775 | SCARNA5 | 2 | NA | NA | NA | NA | 0.69 | 0.04 | 0.30 | 0.05 | 0.28 | 0.49 |
| 677763 | SCARNA21 | 2 | NA | NA | NA | NA | 0.24 | 0.39 | 0.21 | -0.01 | 0.09 | 0.29 |
| NA | NA | 2 | NA | NA | NA | NA | 0.69 | 0.25 | -0.01 | -0.06 | -0.02 | 0.17 |
| NA | NA | 2 | NA | NA | NA | NA | 0.02 | 0.38 | 0.11 | 0.03 | 0.00 | 0.15 |
| NA | NA | 2 | NA | NA | NA | NA | 0.30 | 0.08 | 0.39 | 0.30 | 0.25 | 0.19 |
| 139201 | MAP2K4P1 | 2 | NA | NA | NA | NA | 0.33 | 0.35 | 0.45 | 0.10 | 0.13 | 0.25 |
| 8148 | TAF15 | 2 | NA | NA | NA | NA | 0.20 | 0.34 | 0.31 | -0.05 | 0.18 | 0.41 |
| 157285 | SGK223 | 2 | NA | NA | NA | NA | 0.39 | 0.16 | 0.42 | 0.01 | -0.09 | 0.12 |
| NA | NA | 2 | NA | NA | NA | NA | 0.22 | 0.41 | 0.13 | 0.13 | 0.12 | 0.15 |
| NA | NA | 2 | NA | NA | NA | NA | 0.62 | 0.13 | 0.43 | 0.12 | 0.12 | 0.27 |
| NA | NA | 2 | NA | NA | NA | NA | 0.17 | 0.27 | 0.39 | 0.00 | 0.18 | 0.35 |
| NA | NA | 2 | NA | NA | NA | NA | 0.42 | 0.39 | 0.29 | -0.03 | 0.12 | 0.34 |
| 6542 | SLC7A2 | 3 | Exp 2 | 2.2 | 0.4 | 84.3 | 0.00 | -0.16 | -0.07 | -0.10 | -0.34 | -0.62 |
| 4257 | MGST1 | 3 | Exp 2 | 4 | 0.7 | 32.7 | -0.02 | 0.04 | -0.02 | -0.20 | -0.24 | -0.44 |
| 6591 | SNAI2 | 3 | Power | 3.7 | 0.8 | 152.4 | 0.08 | 0.00 | 0.05 | -0.11 | -0.22 | -0.81 |
| 3755 | KCNG1 | 3 | Exp 2 | 3.3 | 1 | 114.7 | -0.04 | -0.02 | -0.02 | -0.06 | -0.38 | -0.75 |
| 1462 | VCAN | 3 | Exp 2 | 2.4 | 0.7 | 305.1 | 0.15 | -0.10 | 0.07 | -0.06 | -0.38 | -0.79 |
| 23596 | OPN3 | 3 | Exp 2 | 1.2 | 1 | 75.9 | 0.03 | 0.02 | -0.03 | -0.04 | -0.24 | -0.60 |
| 2263 | FGFR2 | 3 | Exp 2 | 1.4 | 0.7 | 47.3 | 0.03 | 0.12 | 0.02 | -0.06 | -0.25 | -0.68 |
| 6196 | RPS6KA2 | 3 | Exp 4 | 0.3 | 0.6 | -52 | -0.08 | 0.02 | -0.17 | -0.27 | -0.47 | -0.37 |
| 771 | CA12 | 3 | Exp 2 | 1.3 | 0.7 | 41.7 | 0.09 | 0.10 | 0.01 | -0.06 | -0.27 | -0.63 |
| 114880 | OSBPL6 | 3 | Exp 4 | 0.9 | 0.9 | 97 | -0.01 | -0.07 | -0.08 | -0.10 | -0.34 | -0.56 |
| 5891 | MOK | 3 | Exp 2 | 1.8 | 0.9 | 210 | 0.07 | -0.05 | -0.02 | -0.04 | -0.35 | -0.73 |
| 9509 | ADAMTS2 | 3 | Exp 2 | 3 | 0.9 | 128.6 | -0.01 | 0.02 | 0.04 | -0.04 | -0.37 | -0.54 |
| 7023 | TFAP4 | 3 | Linear | 2.8 | 0.5 | 62.1 | 0.02 | 0.00 | 0.03 | -0.21 | -0.18 | -0.61 |
| 63935 | PCIF1 | 3 | Poly 2 | 2 | 0.5 | 118.8 | 0.21 | -0.09 | -0.03 | -0.12 | -0.53 | -0.35 |
| 57761 | TRIB3 | 3 | Poly 2 | 2.3 | 0.8 | 203.8 | -0.12 | -0.13 | -0.18 | -0.10 | -0.53 | -0.62 |
| 6907 | TBL1X | 3 | Exp 4 | 1.3 | 0.3 | 105.3 | 0.20 | -0.13 | 0.03 | -0.08 | -0.43 | -0.70 |
| 268 | AMH | 3 | Poly 2 | 1.7 | 0.5 | 36.7 | 0.13 | 0.07 | -0.05 | -0.32 | -0.50 | -0.30 |
| 4223 | MEOX2 | 3 | Exp 2 | 3.7 | 0.5 | -32.5 | 0.05 | -0.08 | -0.08 | -0.09 | -0.28 | -0.48 |
| 1842 | ECM2 | 3 | Exp 2 | 3.8 | 0.9 | 48.5 | -0.09 | -0.08 | -0.17 | -0.19 | -0.35 | -0.57 |
| 59 | ACTA2 | 3 | Exp 2 | 1.7 | 1 | 304.7 | 0.00 | 0.01 | -0.03 | 0.00 | -0.26 | -0.69 |
| 2784 | GNB3 | 3 | Exp 2 | 3.4 | 0.5 | 10.5 | 0.09 | 0.07 | 0.01 | -0.24 | -0.23 | -0.45 |
| 10622 | POLR3G | 3 | Linear | 2.8 | 0.9 | 103.7 | -0.06 | -0.03 | -0.07 | -0.18 | -0.23 | -0.62 |
| 1809 | DPYSL3 | 3 | Poly 2 | 0.9 | 0.9 | 197.4 | 0.09 | 0.03 | 0.01 | -0.05 | -0.33 | -0.63 |
| 8614 | STC2 | 3 | Exp 2 | 1.4 | 0.4 | 240.5 | 0.11 | 0.13 | 0.07 | -0.07 | -0.31 | -0.75 |
| 1491 | CTH | 3 | Poly 2 | 1.2 | 0.6 | 37.7 | 0.04 | -0.12 | -0.05 | -0.13 | -0.54 | -0.59 |
| 57568 | SIPA1L2 | 3 | Exp 2 | 1.7 | 0.9 | 39.3 | 0.05 | 0.03 | 0.06 | -0.14 | -0.31 | -0.74 |
| 196483 | EEF2KMT | 3 | Poly 2 | 1.4 | 0.7 | 41.6 | 0.07 | -0.14 | -0.07 | -0.04 | -0.38 | -0.59 |
| 84898 | PLXDC2 | 3 | Exp 4 | 1.4 | 0.2 | 8.6 | 0.13 | -0.08 | 0.08 | -0.06 | -0.26 | -0.45 |
| 8165 | AKAP1 | 3 | Exp 2 | 2.1 | 0.2 | 136.4 | 0.13 | -0.08 | 0.06 | -0.12 | -0.23 | -0.56 |
| 23024 | PDZRN3 | 3 | Exp 2 | 1.9 | 0.5 | 4.4 | -0.08 | 0.04 | 0.01 | -0.05 | -0.32 | -0.63 |
| 5737 | PTGFR | 3 | Exp 2 | 2.6 | 1 | 88.9 | -0.06 | -0.01 | -0.07 | -0.12 | -0.29 | -0.60 |
| 84899 | TMTC4 | 3 | Linear | 1.5 | 0.7 | 21.8 | -0.12 | -0.07 | -0.07 | -0.09 | -0.30 | -0.77 |
| 10606 | PAICS | 3 | Exp 4 | 0.9 | 0.8 | 330.6 | 0.11 | 0.04 | -0.01 | -0.10 | -0.33 | -0.58 |
| 79094 | CHAC1 | 3 | Poly 2 | 1.3 | 0.9 | 194.7 | 0.17 | 0.01 | -0.07 | -0.27 | -0.77 | -0.51 |
| 4016 | LOXL1 | 3 | Exp 2 | 1.7 | 0.7 | 222.3 | 0.11 | 0.11 | 0.04 | -0.04 | -0.34 | -0.67 |
| 1131 | CHRM3 | 3 | Exp 2 | 1.6 | 0.6 | -35.8 | -0.02 | -0.12 | 0.02 | -0.08 | -0.40 | -0.75 |
| 80206 | FHOD3 | 3 | Exp 2 | 1 | 0.5 | 55.6 | -0.07 | 0.03 | -0.02 | -0.03 | -0.28 | -0.68 |
| 2295 | FOXF2 | 3 | Exp 4 | 1.1 | 0.9 | 20.9 | 0.00 | 0.00 | -0.01 | -0.21 | -0.37 | -0.59 |
| 85462 | FHDC1 | 3 | Exp 2 | 2.9 | 0.8 | 44.2 | 0.02 | -0.12 | -0.02 | -0.03 | -0.33 | -0.55 |
| 84665 | MYPN | 3 | Exp 2 | 3.1 | 1 | 34.7 | 0.01 | -0.06 | -0.05 | -0.05 | -0.31 | -0.66 |
| 80144 | FRAS1 | 3 | Exp 2 | 3.3 | 0.7 | 86.4 | 0.14 | -0.05 | 0.08 | -0.01 | -0.30 | -0.53 |
| 51176 | LEF1 | 3 | Poly 2 | 2 | 0.3 | 137.6 | 0.20 | -0.12 | 0.00 | -0.21 | -0.51 | -0.52 |
| 85352 | KIAA1644 | 3 | Linear | 2.7 | 1 | 81.4 | 0.03 | 0.02 | 0.02 | -0.04 | -0.24 | -0.73 |
| 121227 | LRIG3 | 3 | Exp 2 | 1.8 | 0 | 88.3 | -0.11 | -0.20 | -0.10 | -0.10 | -0.32 | -0.67 |
| 147381 | CBLN2 | 3 | Exp 2 | 2.1 | 0.7 | -12.9 | -0.01 | -0.01 | -0.09 | -0.12 | -0.31 | -0.62 |
| 8497 | PPFIA4 | 3 | Exp 2 | 2.6 | 0.7 | 59.1 | 0.05 | 0.07 | -0.04 | -0.21 | -0.28 | -0.61 |
| 1295 | COL8A1 | 3 | Exp 2 | 2.3 | 1 | 134.3 | 0.06 | 0.01 | -0.03 | -0.05 | -0.28 | -0.73 |
| 1730 | DIAPH2 | 3 | Exp 4 | 0.9 | 0.3 | 80 | -0.05 | -0.14 | -0.09 | -0.14 | -0.36 | -0.57 |
| 8038 | ADAM12 | 3 | Poly 2 | 1.2 | 0.6 | 182.5 | 0.19 | -0.01 | 0.08 | -0.11 | -0.47 | -0.61 |
| 10873 | ME3 | 3 | Exp 2 | 1.7 | 0.9 | 112.9 | -0.07 | -0.01 | -0.08 | -0.04 | -0.28 | -0.62 |
| 5163 | PDK1 | 3 | Exp 2 | 2.7 | 1 | 149.6 | -0.01 | -0.08 | -0.06 | -0.09 | -0.25 | -0.60 |
| 79047 | KCTD15 | 3 | Exp 2 | 1.8 | 0.8 | 145.8 | -0.05 | -0.08 | -0.02 | -0.12 | -0.36 | -0.71 |
| 223117 | SEMA3D | 3 | Linear | 2.1 | 1 | 145.5 | 0.07 | 0.08 | 0.02 | -0.07 | -0.19 | -0.75 |
| 133522 | PPARGC1B | 3 | Exp 4 | 1 | 0.8 | 25.8 | 0.20 | 0.04 | 0.05 | -0.09 | -0.42 | -0.70 |
| 4325 | MMP16 | 3 | Exp 2 | 3.7 | 1 | 158.4 | 0.02 | -0.10 | 0.00 | -0.08 | -0.26 | -0.55 |
| 23057 | NMNAT2 | 3 | Exp 2 | 2 | 0.7 | 37 | 0.15 | 0.04 | 0.03 | -0.01 | -0.32 | -0.75 |
| 10785 | WDR4 | 3 | Exp 2 | 2.9 | 0.9 | 100.4 | -0.11 | -0.06 | -0.05 | -0.11 | -0.29 | -0.56 |
| 205 | AK4 | 3 | Exp 2 | 2 | 0.9 | 202.9 | 0.05 | -0.04 | 0.03 | -0.04 | -0.39 | -0.73 |
| 72 | ACTG2 | 3 | Exp 2 | 4.2 | 0.7 | 190.8 | 0.16 | -0.01 | 0.07 | -0.10 | -0.38 | -0.59 |
| 51313 | FAM198B | 3 | Linear | 2.4 | 0.9 | 154.1 | 0.01 | 0.05 | 0.06 | -0.14 | -0.22 | -0.81 |
| 64399 | HHIP | 3 | Exp 2 | 4.2 | 0.8 | 90.1 | 0.03 | 0.08 | -0.01 | -0.11 | -0.34 | -0.70 |
| 84858 | ZNF503 | 3 | Exp 2 | 3.5 | 0.5 | 83.5 | 0.26 | -0.02 | 0.07 | -0.12 | -0.24 | -0.60 |
| 79827 | CLMP | 3 | Linear | 2.3 | 1 | 134.9 | -0.02 | 0.03 | 0.05 | -0.05 | -0.28 | -0.69 |
| 79156 | PLEKHF1 | 3 | Exp 2 | 2.1 | 0.7 | 19.2 | 0.02 | -0.05 | -0.11 | -0.12 | -0.27 | -0.54 |
| 54541 | DDIT4 | 3 | Poly 2 | 1.3 | 1 | 220 | 0.11 | 0.03 | -0.05 | -0.11 | -0.65 | -0.66 |
| 3667 | IRS1 | 3 | Linear | 3.5 | 0.7 | 202.6 | 0.17 | -0.07 | 0.04 | -0.08 | -0.18 | -0.71 |
| 6335 | SCN9A | 3 | Exp 2 | 2 | 0.9 | 161.8 | -0.01 | -0.05 | -0.03 | -0.11 | -0.40 | -0.78 |
| 4648 | MYO7B | 3 | Exp 4 | 1.3 | 0.7 | 103.7 | 0.10 | -0.06 | 0.05 | -0.12 | -0.44 | -0.75 |
| 1184 | CLCN5 | 3 | Exp 4 | 1.2 | 0.7 | 6.2 | 0.03 | -0.13 | -0.10 | -0.14 | -0.35 | -0.49 |
| 79683 | ZDHHC14 | 3 | Poly 2 | 1.2 | 0.6 | -60 | -0.11 | -0.01 | 0.00 | -0.09 | -0.39 | -0.43 |
| 158135 | TTLL11 | 3 | Exp 4 | 1.5 | 0.2 | -96 | -0.03 | -0.11 | -0.05 | -0.20 | -0.26 | -0.41 |
| 10265 | IRX5 | 3 | Exp 2 | 2.4 | 0.5 | -47.5 | 0.14 | 0.15 | 0.01 | -0.07 | -0.29 | -0.44 |
| 92949 | ADAMTSL1 | 3 | Exp 2 | 2.1 | 0.7 | 114.5 | 0.08 | -0.02 | 0.00 | -0.09 | -0.39 | -0.64 |
| 57673 | BEND3 | 3 | Linear | 1.8 | 0.9 | 88 | 0.06 | -0.05 | 0.03 | -0.08 | -0.23 | -0.74 |
| 115207 | KCTD12 | 3 | Exp 2 | 2.2 | 1 | 147.5 | 0.08 | 0.00 | 0.09 | -0.16 | -0.26 | -0.80 |
| 1002 | CDH4 | 3 | Exp 5 | 0.4 | 0.4 | -65.8 | 0.05 | 0.10 | 0.00 | -0.24 | -0.32 | -0.47 |
| 24147 | FJX1 | 3 | Linear | 2.2 | 0.9 | 95.9 | -0.04 | -0.03 | -0.10 | -0.04 | -0.24 | -0.79 |
| 8334 | HIST1H2AC | 3 | Exp 2 | 1.5 | 0.3 | 286.7 | 0.06 | 0.11 | -0.05 | 0.01 | -0.36 | -0.64 |
| 6478 | SIAH2 | 3 | Exp 2 | 1.3 | 0.7 | 135.2 | -0.04 | -0.01 | -0.08 | -0.07 | -0.36 | -0.63 |
| 8633 | UNC5C | 3 | Exp 2 | 4.5 | 0.9 | -25.2 | 0.07 | -0.04 | 0.01 | -0.03 | -0.29 | -0.50 |
| 5831 | PYCR1 | 3 | Exp 2 | 2.8 | 0.7 | 223.4 | -0.04 | -0.09 | -0.14 | -0.04 | -0.44 | -0.65 |
| 10186 | LHFP | 3 | Exp 2 | 2.2 | 0.6 | 121 | -0.13 | -0.05 | -0.10 | -0.09 | -0.31 | -0.57 |
| 57528 | KCTD16 | 3 | Poly 2 | 1.3 | 1 | -40.7 | -0.07 | -0.07 | -0.13 | -0.12 | -0.40 | -0.31 |
| 71 | ACTG1 | 3 | Exp 2 | 1.7 | 0.8 | 500.1 | 0.05 | 0.01 | 0.08 | 0.00 | -0.31 | -0.64 |
| 139285 | AMER1 | 3 | Exp 2 | 1.9 | 0.7 | 64.6 | 0.07 | 0.03 | 0.03 | -0.10 | -0.24 | -0.53 |
| 51334 | PRR16 | 3 | Exp 2 | 2.9 | 0.9 | 10.3 | 0.05 | 0.05 | 0.03 | -0.15 | -0.22 | -0.55 |
| 7490 | WT1 | 3 | Exp 2 | 3.6 | 0.3 | 5.3 | 0.08 | -0.18 | 0.02 | -0.09 | -0.24 | -0.44 |
| 55615 | PRR5 | 3 | Exp 2 | 3.2 | 0.8 | -13.9 | 0.04 | -0.12 | 0.03 | -0.11 | -0.19 | -0.46 |
| NA | NA | 3 | Poly 2 | 1.2 | 0.3 | -38 | 0.09 | -0.04 | -0.04 | 0.04 | -0.39 | -0.37 |
| 284338 | PRR19 | 3 | Poly 2 | 1.4 | 0.8 | -40.4 | 0.04 | 0.04 | 0.05 | 0.02 | -0.43 | -0.16 |
| 3897 | L1CAM | 3 | Exp 2 | 5 | 0.8 | 188.3 | 0.30 | 0.18 | 0.19 | -0.06 | -0.34 | -0.58 |
| 1306 | COL15A1 | 3 | Exp 2 | 2.1 | 0.4 | 13.8 | 0.00 | -0.18 | -0.13 | -0.14 | -0.30 | -0.65 |
| 648791 | PPP1R3G | 3 | Linear | 3 | 1 | 61 | -0.02 | -0.03 | -0.10 | -0.03 | -0.32 | -0.59 |
| 57291 | DANCR | 3 | Exp 2 | 2.7 | 0.5 | 77.2 | -0.10 | -0.16 | -0.15 | -0.09 | -0.33 | -0.56 |
| 101929460 | LOC101929460 | 3 | Exp 2 | 1.3 | 0.9 | -86.7 | 0.07 | 0.02 | -0.04 | -0.03 | -0.31 | -0.67 |
| 100874032 | PRRT3-AS1 | 3 | Hill | 1 | 0.9 | -65.4 | 0.05 | -0.03 | -0.02 | -0.09 | -0.28 | -0.46 |
| 343171 | OR2W3 | 3 | Exp 2 | 2.8 | 1 | 49.9 | 0.06 | -0.03 | -0.05 | -0.10 | -0.25 | -0.57 |
| 81567 | TXNDC5 | 3 | Poly 3 | 1 | 0 | 83.6 | 0.36 | 0.53 | -0.23 | -0.51 | -0.62 | -0.49 |
| 353376;100302736 | TICAM2;TMED7-TICAM2 | 3 | Exp 2 | 4.2 | 0.7 | -58 | -0.10 | -0.15 | -0.11 | -0.11 | -0.36 | -0.43 |
| 100506211 | MIR210HG | 3 | Linear | 3.1 | 1 | 36.2 | -0.01 | -0.05 | -0.01 | -0.14 | -0.25 | -0.62 |
| 100192378 | ZFHX4-AS1 | 3 | Exp 2 | 2.3 | 0.7 | 23.6 | -0.16 | -0.07 | -0.11 | -0.08 | -0.34 | -0.74 |
| 91893 | FDXACB1 | 3 | Poly 2 | 1.2 | 0 | -42.1 | -0.23 | -0.21 | -0.20 | -0.17 | -0.48 | -0.58 |
| 55879 | GABRQ | 3 | Exp 2 | 4.4 | 0.4 | -54.9 | 0.09 | -0.06 | -0.07 | -0.06 | -0.28 | -0.39 |
| 104472717 | LINC01224 | 3 | Exp 2 | 3.1 | 0.7 | 161.3 | 0.12 | -0.06 | -0.03 | -0.11 | -0.30 | -0.59 |
| 8342 | HIST1H2BM | 3 | Exp 2 | 3 | 0.6 | 5.6 | 0.18 | -0.02 | 0.08 | -0.07 | -0.36 | -0.75 |
| 8968 | HIST1H3F | 3 | Exp 2 | 3.6 | 1 | 37.6 | 0.04 | 0.07 | -0.10 | -0.04 | -0.35 | -0.66 |
| 2556 | GABRA3 | 3 | NA | NA | NA | NA | 0.00 | -0.23 | -0.26 | -0.25 | -0.53 | -0.60 |
| 10046 | MAMLD1 | 3 | NA | NA | NA | NA | 0.24 | -0.04 | 0.12 | -0.12 | -0.22 | -0.38 |
| 960 | CD44 | 3 | NA | NA | NA | NA | 0.01 | -0.03 | 0.10 | -0.06 | -0.29 | -0.42 |
| 4285 | MIPEP | 3 | NA | NA | NA | NA | -0.04 | -0.16 | -0.08 | 0.01 | -0.34 | -0.44 |
| 1112 | FOXN3 | 3 | NA | NA | NA | NA | 0.25 | -0.02 | 0.10 | -0.12 | -0.31 | -0.49 |
| 57602 | USP36 | 3 | NA | NA | NA | NA | 0.20 | -0.14 | -0.03 | -0.14 | -0.40 | -0.42 |
| 493 | ATP2B4 | 3 | NA | NA | NA | NA | 0.31 | -0.20 | 0.03 | -0.07 | -0.37 | -0.45 |
| 9697 | TRAM2 | 3 | NA | NA | NA | NA | 0.24 | 0.03 | 0.10 | -0.07 | -0.33 | -0.48 |
| 27440 | CECR5 | 3 | NA | NA | NA | NA | -0.03 | -0.07 | -0.06 | 0.02 | -0.32 | -0.48 |
| 440 | ASNS | 3 | NA | NA | NA | NA | -0.14 | -0.17 | -0.21 | -0.16 | -0.54 | -0.43 |
| 6720 | SREBF1 | 3 | NA | NA | NA | NA | 0.22 | -0.02 | -0.01 | -0.11 | -0.38 | -0.43 |
| 60 | ACTB | 3 | NA | NA | NA | NA | 0.16 | 0.08 | 0.16 | -0.08 | -0.26 | -0.38 |
| 55034 | MOCOS | 3 | NA | NA | NA | NA | 0.15 | 0.10 | 0.08 | -0.12 | -0.38 | -0.39 |
| 56915 | EXOSC5 | 3 | NA | NA | NA | NA | 0.00 | -0.07 | -0.06 | -0.01 | -0.31 | -0.48 |
| 57605 | PITPNM2 | 3 | NA | NA | NA | NA | 0.15 | -0.07 | 0.08 | -0.19 | -0.45 | -0.37 |
| 3326 | HSP90AB1 | 3 | NA | NA | NA | NA | 0.14 | -0.22 | -0.05 | -0.17 | -0.40 | -0.38 |
| 23170 | TTLL12 | 3 | NA | NA | NA | NA | 0.17 | 0.01 | 0.02 | -0.10 | -0.40 | -0.48 |
| 328 | APEX1 | 3 | NA | NA | NA | NA | 0.29 | 0.24 | 0.29 | -0.28 | -0.45 | -0.43 |
| 5106 | PCK2 | 3 | NA | NA | NA | NA | 0.02 | -0.03 | -0.07 | -0.10 | -0.41 | -0.38 |
| 25878 | MXRA5 | 3 | NA | NA | NA | NA | 0.17 | -0.09 | 0.10 | -0.14 | -0.32 | -0.50 |
| 5355 | PLP2 | 3 | NA | NA | NA | NA | 0.16 | -0.09 | -0.06 | -0.15 | -0.43 | -0.45 |
| 54985 | HCFC1R1 | 3 | NA | NA | NA | NA | 0.03 | -0.18 | -0.18 | -0.25 | -0.49 | -0.54 |
| 8140 | SLC7A5 | 3 | NA | NA | NA | NA | 0.36 | 0.14 | 0.24 | -0.12 | -0.39 | -0.51 |
| 6510 | SLC1A5 | 3 | NA | NA | NA | NA | 0.18 | 0.09 | 0.11 | -0.09 | -0.33 | -0.39 |
| 2617 | GARS | 3 | NA | NA | NA | NA | -0.12 | -0.04 | -0.08 | -0.12 | -0.34 | -0.45 |
| 158471 | PRUNE2 | 3 | NA | NA | NA | NA | 0.15 | -0.07 | 0.00 | -0.08 | -0.25 | -0.44 |
| 169792 | GLIS3 | 3 | NA | NA | NA | NA | 0.12 | -0.02 | 0.08 | -0.08 | -0.27 | -0.43 |
| 9124 | PDLIM1 | 3 | NA | NA | NA | NA | 0.06 | -0.08 | 0.07 | -0.14 | -0.31 | -0.42 |
| 5216 | PFN1 | 3 | NA | NA | NA | NA | 0.14 | -0.10 | -0.07 | -0.11 | -0.39 | -0.35 |
| 51166 | AADAT | 3 | NA | NA | NA | NA | 0.04 | 0.08 | 0.00 | -0.13 | -0.28 | -0.46 |
| 4839 | NOP2 | 3 | NA | NA | NA | NA | 0.06 | -0.04 | -0.03 | -0.05 | -0.30 | -0.52 |
| 1303 | COL12A1 | 3 | NA | NA | NA | NA | 0.14 | -0.12 | 0.07 | -0.02 | -0.22 | -0.43 |
| 80329 | ULBP1 | 3 | NA | NA | NA | NA | 0.04 | 0.08 | -0.02 | -0.16 | -0.38 | -0.27 |
| 2030 | SLC29A1 | 3 | NA | NA | NA | NA | 0.18 | 0.09 | 0.14 | -0.15 | -0.36 | -0.43 |
| 55374 | TMCO6 | 3 | NA | NA | NA | NA | 0.04 | -0.04 | -0.08 | -0.06 | -0.33 | -0.46 |
| 5159 | PDGFRB | 3 | NA | NA | NA | NA | 0.12 | 0.05 | 0.08 | -0.04 | -0.21 | -0.39 |
| 868 | CBLB | 3 | NA | NA | NA | NA | 0.17 | -0.19 | -0.16 | -0.32 | -0.62 | -0.68 |
| 5013 | OTX1 | 3 | NA | NA | NA | NA | 0.20 | -0.02 | -0.08 | -0.16 | -0.43 | -0.33 |
| 6509 | SLC1A4 | 3 | NA | NA | NA | NA | 0.08 | 0.10 | 0.06 | -0.10 | -0.38 | -0.50 |
| 6723 | SRM | 3 | NA | NA | NA | NA | 0.12 | 0.10 | 0.12 | -0.31 | -0.67 | -0.53 |
| 64858 | DCLRE1B | 3 | NA | NA | NA | NA | 0.08 | -0.13 | -0.05 | -0.08 | -0.29 | -0.38 |
| 11278 | KLF12 | 3 | NA | NA | NA | NA | 0.15 | -0.07 | 0.01 | -0.11 | -0.33 | -0.51 |
| 84886 | C1orf198 | 3 | NA | NA | NA | NA | 0.32 | 0.02 | 0.16 | -0.05 | -0.24 | -0.41 |
| 10783 | NEK6 | 3 | NA | NA | NA | NA | 0.05 | 0.04 | 0.04 | -0.05 | -0.25 | -0.46 |
| 25902 | MTHFD1L | 3 | NA | NA | NA | NA | 0.12 | 0.12 | 0.16 | -0.07 | -0.29 | -0.56 |
| 80114 | BICC1 | 3 | NA | NA | NA | NA | 0.01 | -0.05 | -0.04 | -0.11 | -0.22 | -0.49 |
| 860 | RUNX2 | 3 | NA | NA | NA | NA | 0.22 | -0.14 | 0.00 | -0.14 | -0.44 | -0.64 |
| 4502 | MT2A | 3 | NA | NA | NA | NA | 0.01 | -0.06 | -0.12 | -0.23 | -0.56 | -0.60 |
| 54982 | CLN6 | 3 | NA | NA | NA | NA | 0.01 | 0.00 | 0.03 | -0.11 | -0.28 | -0.39 |
| 84705 | GTPBP3 | 3 | NA | NA | NA | NA | 0.11 | -0.13 | -0.09 | -0.02 | -0.27 | -0.50 |
| 79709 | COLGALT1 | 3 | NA | NA | NA | NA | 0.08 | 0.02 | 0.06 | -0.09 | -0.30 | -0.45 |
| 1802 | DPH2 | 3 | NA | NA | NA | NA | 0.07 | 0.02 | 0.02 | -0.09 | -0.33 | -0.46 |
| 10400 | PEMT | 3 | NA | NA | NA | NA | 0.10 | -0.07 | -0.11 | -0.11 | -0.52 | -0.31 |
| 4017 | LOXL2 | 3 | NA | NA | NA | NA | 0.09 | 0.02 | 0.17 | -0.01 | -0.32 | -0.45 |
| 51303 | FKBP11 | 3 | NA | NA | NA | NA | 0.02 | -0.07 | 0.03 | -0.11 | -0.31 | -0.42 |
| 3939 | LDHA | 3 | NA | NA | NA | NA | 0.08 | 0.04 | 0.14 | -0.07 | -0.28 | -0.45 |
| 89796 | NAV1 | 3 | NA | NA | NA | NA | 0.30 | -0.22 | 0.03 | -0.12 | -0.47 | -0.45 |
| 55226 | NAT10 | 3 | NA | NA | NA | NA | 0.20 | -0.16 | 0.03 | -0.14 | -0.40 | -0.45 |
| 1019 | CDK4 | 3 | NA | NA | NA | NA | -0.03 | -0.08 | -0.09 | -0.03 | -0.37 | -0.49 |
| 160428 | ALDH1L2 | 3 | NA | NA | NA | NA | 0.11 | 0.03 | 0.10 | -0.26 | -0.50 | -0.40 |
| 55316 | RSAD1 | 3 | NA | NA | NA | NA | -0.09 | -0.19 | -0.06 | -0.06 | -0.32 | -0.42 |
| 22801 | ITGA11 | 3 | NA | NA | NA | NA | 0.27 | -0.11 | 0.05 | -0.20 | -0.69 | -0.65 |
| 8884 | SLC5A6 | 3 | NA | NA | NA | NA | 0.07 | 0.04 | 0.01 | -0.01 | -0.26 | -0.42 |
| 2120 | ETV6 | 3 | NA | NA | NA | NA | 0.16 | -0.05 | 0.06 | -0.14 | -0.25 | -0.39 |
| 144165 | PRICKLE1 | 3 | NA | NA | NA | NA | 0.09 | -0.06 | 0.09 | -0.07 | -0.27 | -0.47 |
| 83729 | INHBE | 3 | NA | NA | NA | NA | 0.16 | 0.02 | -0.04 | -0.16 | -0.51 | -0.53 |
| 84916 | UTP4 | 3 | NA | NA | NA | NA | 0.04 | -0.07 | 0.02 | -0.15 | -0.44 | -0.45 |
| 28987 | NOB1 | 3 | NA | NA | NA | NA | -0.01 | 0.06 | 0.06 | -0.09 | -0.27 | -0.43 |
| 81875 | ISG20L2 | 3 | NA | NA | NA | NA | 0.10 | -0.22 | -0.17 | -0.09 | -0.36 | -0.38 |
| 3899 | AFF3 | 3 | NA | NA | NA | NA | 0.13 | -0.03 | 0.12 | -0.21 | -0.46 | -0.47 |
| 9718 | ECE2 | 3 | NA | NA | NA | NA | -0.05 | -0.18 | -0.04 | -0.05 | -0.34 | -0.39 |
| 2044 | EPHA5 | 3 | NA | NA | NA | NA | 0.10 | -0.01 | 0.07 | -0.17 | -0.27 | -0.51 |
| 23092 | ARHGAP26 | 3 | NA | NA | NA | NA | 0.07 | -0.16 | -0.12 | -0.23 | -0.36 | -0.41 |
| 9586 | CREB5 | 3 | NA | NA | NA | NA | 0.21 | -0.10 | 0.02 | -0.12 | -0.26 | -0.57 |
| 1956 | EGFR | 3 | NA | NA | NA | NA | 0.28 | -0.16 | 0.05 | -0.05 | -0.36 | -0.46 |
| 7436 | VLDLR | 3 | NA | NA | NA | NA | 0.09 | -0.09 | -0.15 | -0.05 | -0.42 | -0.49 |
| 4781 | NFIB | 3 | NA | NA | NA | NA | 0.14 | -0.19 | 0.01 | -0.16 | -0.31 | -0.41 |
| 10280 | SIGMAR1 | 3 | NA | NA | NA | NA | 0.07 | 0.01 | -0.04 | -0.12 | -0.38 | -0.52 |
| 23082 | PPRC1 | 3 | NA | NA | NA | NA | 0.30 | 0.08 | 0.18 | -0.09 | -0.30 | -0.44 |
| 84623 | KIRREL3 | 3 | NA | NA | NA | NA | 0.09 | 0.05 | 0.04 | -0.03 | -0.25 | -0.42 |
| 26040 | SETBP1 | 3 | NA | NA | NA | NA | 0.19 | -0.15 | -0.09 | -0.09 | -0.35 | -0.45 |
| 112616 | CMTM7 | 3 | NA | NA | NA | NA | 0.04 | 0.08 | -0.03 | -0.20 | -0.37 | -0.44 |
| 286343 | LURAP1L | 3 | NA | NA | NA | NA | 0.03 | 0.00 | -0.12 | -0.13 | -0.34 | -0.49 |
| 118980 | SFXN2 | 3 | NA | NA | NA | NA | -0.10 | -0.14 | -0.09 | -0.15 | -0.33 | -0.40 |
| 127281 | FAM213B | 3 | NA | NA | NA | NA | 0.11 | -0.01 | -0.09 | -0.14 | -0.40 | -0.54 |
| 26053 | AUTS2 | 3 | NA | NA | NA | NA | 0.01 | -0.13 | -0.07 | -0.26 | -0.37 | -0.49 |
| 55199 | FAM86C1 | 3 | NA | NA | NA | NA | 0.06 | -0.21 | -0.09 | -0.09 | -0.30 | -0.43 |
| 5316 | PKNOX1 | 3 | NA | NA | NA | NA | 0.20 | -0.01 | -0.01 | -0.17 | -0.49 | -0.44 |
| 1953 | MEGF6 | 3 | NA | NA | NA | NA | -0.02 | -0.06 | -0.03 | -0.15 | -0.34 | -0.40 |
| 1293 | COL6A3 | 3 | NA | NA | NA | NA | 0.06 | 0.09 | 0.15 | -0.02 | -0.27 | -0.48 |
| 323 | APBB2 | 3 | NA | NA | NA | NA | 0.20 | -0.06 | 0.02 | -0.06 | -0.30 | -0.45 |
| 10085 | EDIL3 | 3 | NA | NA | NA | NA | 0.02 | -0.05 | 0.01 | -0.13 | -0.20 | -0.52 |
| 1879 | EBF1 | 3 | NA | NA | NA | NA | 0.02 | -0.13 | -0.12 | -0.16 | -0.40 | -0.41 |
| 2898 | GRIK2 | 3 | NA | NA | NA | NA | 0.03 | -0.31 | -0.20 | -0.16 | -0.33 | -0.53 |
| 26050 | SLITRK5 | 3 | NA | NA | NA | NA | 0.09 | -0.01 | 0.04 | -0.24 | -0.36 | -0.53 |
| 84706 | GPT2 | 3 | NA | NA | NA | NA | 0.07 | 0.11 | 0.04 | -0.08 | -0.34 | -0.42 |
| 7171 | TPM4 | 3 | NA | NA | NA | NA | 0.08 | -0.28 | -0.14 | -0.08 | -0.26 | -0.48 |
| 84926 | SPRYD3 | 3 | NA | NA | NA | NA | 0.05 | -0.08 | -0.06 | -0.14 | -0.31 | -0.49 |
| 6520 | SLC3A2 | 3 | NA | NA | NA | NA | -0.03 | -0.03 | -0.03 | 0.01 | -0.33 | -0.44 |
| 4330 | MN1 | 3 | NA | NA | NA | NA | 0.21 | -0.29 | 0.04 | -0.31 | -0.48 | -0.66 |
| 91752 | ZNF804A | 3 | NA | NA | NA | NA | 0.21 | -0.12 | -0.08 | -0.11 | -0.38 | -0.45 |
| 5036 | PA2G4 | 3 | NA | NA | NA | NA | 0.04 | -0.11 | -0.10 | -0.05 | -0.27 | -0.52 |
| 26115 | TANC2 | 3 | NA | NA | NA | NA | 0.28 | -0.08 | 0.06 | -0.10 | -0.47 | -0.38 |
| 1051 | CEBPB | 3 | NA | NA | NA | NA | 0.02 | 0.12 | 0.02 | -0.20 | -0.32 | -0.42 |
| 54796 | BNC2 | 3 | NA | NA | NA | NA | 0.14 | -0.05 | 0.03 | -0.13 | -0.44 | -0.57 |
| 6573 | SLC19A1 | 3 | NA | NA | NA | NA | 0.02 | -0.02 | 0.03 | -0.15 | -0.29 | -0.53 |
| 348180 | CTU2 | 3 | NA | NA | NA | NA | -0.02 | -0.02 | -0.05 | -0.11 | -0.35 | -0.47 |
| 144577 | C12orf66 | 3 | NA | NA | NA | NA | 0.07 | 0.02 | 0.06 | -0.09 | -0.24 | -0.41 |
| 254531 | LPCAT4 | 3 | NA | NA | NA | NA | 0.11 | -0.18 | -0.04 | -0.15 | -0.33 | -0.40 |
| 158056 | MAMDC4 | 3 | NA | NA | NA | NA | -0.04 | -0.09 | -0.06 | -0.32 | -0.31 | -0.38 |
| 404217 | CTXN1 | 3 | NA | NA | NA | NA | 0.20 | -0.13 | -0.08 | -0.22 | -0.42 | -0.40 |
| 143458 | LDLRAD3 | 3 | NA | NA | NA | NA | 0.22 | -0.08 | 0.11 | -0.20 | -0.38 | -0.45 |
| 55137 | FIGN | 3 | NA | NA | NA | NA | 0.13 | -0.11 | -0.07 | -0.24 | -0.35 | -0.38 |
| 10082 | GPC6 | 3 | NA | NA | NA | NA | 0.00 | -0.09 | -0.08 | -0.20 | -0.31 | -0.40 |
| 23466 | CBX6 | 3 | NA | NA | NA | NA | 0.09 | -0.04 | 0.04 | -0.16 | -0.28 | -0.43 |
| 6586 | SLIT3 | 3 | NA | NA | NA | NA | 0.20 | 0.13 | 0.17 | -0.16 | -0.50 | -0.41 |
| 338785 | KRT79 | 3 | NA | NA | NA | NA | -0.10 | -0.18 | -0.12 | -0.14 | -0.33 | -0.47 |
| 347454 | SOWAHD | 3 | NA | NA | NA | NA | -0.12 | -0.15 | -0.03 | -0.10 | -0.48 | -0.40 |
| 1978 | EIF4EBP1 | 3 | NA | NA | NA | NA | -0.02 | -0.02 | -0.08 | -0.04 | -0.27 | -0.52 |
| 29780 | PARVB | 3 | NA | NA | NA | NA | 0.17 | -0.11 | -0.04 | -0.11 | -0.42 | -0.39 |
| 203068 | TUBB | 3 | NA | NA | NA | NA | 0.17 | 0.06 | 0.08 | -0.10 | -0.39 | -0.25 |
| 6536 | SLC6A9 | 3 | NA | NA | NA | NA | 0.08 | -0.08 | -0.04 | -0.34 | -0.44 | -0.46 |
| 388796 | SNHG17 | 3 | NA | NA | NA | NA | 0.04 | 0.03 | 0.05 | -0.18 | -0.35 | -0.41 |
| 9260 | PDLIM7 | 3 | NA | NA | NA | NA | 0.22 | -0.12 | 0.00 | -0.18 | -0.51 | -0.53 |
| NA | NA | 3 | NA | NA | NA | NA | -0.09 | -0.13 | 0.08 | -0.04 | -0.54 | -0.51 |
| 10195 | ALG3 | 3 | NA | NA | NA | NA | 0.15 | 0.06 | 0.01 | -0.21 | -0.43 | -0.27 |
| 84848 | MIR503HG | 3 | NA | NA | NA | NA | -0.03 | -0.12 | -0.01 | -0.27 | -0.19 | -0.40 |
| 345643 | MCIDAS | 3 | NA | NA | NA | NA | 0.13 | 0.00 | -0.07 | -0.16 | -0.54 | -0.47 |
| 23089 | PEG10 | 3 | NA | NA | NA | NA | 0.13 | 0.00 | 0.09 | -0.10 | -0.24 | -0.48 |
| NA | NA | 3 | NA | NA | NA | NA | 0.14 | -0.08 | -0.04 | -0.13 | -0.33 | -0.43 |
| NA | NA | 3 | NA | NA | NA | NA | -0.19 | -0.07 | -0.11 | -0.24 | -0.30 | -0.48 |
| NA | NA | 3 | NA | NA | NA | NA | -0.07 | -0.10 | -0.12 | -0.09 | -0.42 | -0.19 |
| NA | NA | 3 | NA | NA | NA | NA | 0.12 | -0.03 | -0.04 | -0.17 | -0.34 | -0.39 |
| 100128881 | VPS9D1-AS1 | 3 | NA | NA | NA | NA | 0.24 | -0.01 | 0.09 | -0.22 | -0.48 | -0.60 |
| 6182 | MRPL12 | 3 | NA | NA | NA | NA | 0.10 | 0.07 | 0.23 | -0.02 | -0.41 | -0.27 |
| 4082 | MARCKS | 3 | NA | NA | NA | NA | 0.29 | 0.04 | 0.10 | -0.15 | -0.18 | -0.52 |
| NA | NA | 3 | NA | NA | NA | NA | -0.07 | -0.06 | -0.03 | -0.09 | -0.41 | -0.21 |
| NA | NA | 3 | NA | NA | NA | NA | -0.05 | -0.05 | 0.01 | -0.04 | -0.41 | -0.15 |
| 1591 | CYP24A1 | 4 | Linear | 3.4 | 0.7 | 221.1 | 0.08 | -0.08 | 0.11 | 0.11 | -0.09 | -0.82 |
| 3371 | TNC | 4 | Exp 2 | 2.1 | 0.2 | 270.7 | 0.33 | 0.17 | 0.28 | 0.03 | -0.26 | -0.67 |
| 27092 | CACNG4 | 4 | Linear | 4.8 | 0.8 | 48.8 | 0.11 | 0.16 | 0.16 | 0.02 | -0.05 | -0.53 |
| 7042 | TGFB2 | 4 | Poly 2 | 3.6 | 0.8 | 247.2 | 0.02 | 0.05 | 0.12 | 0.03 | 0.07 | -0.88 |
| 8829 | NRP1 | 4 | Exp 2 | 1 | 0.1 | 156.7 | 0.13 | 0.11 | 0.15 | -0.02 | -0.21 | -0.67 |
| 83716 | CRISPLD2 | 4 | Linear | 2.2 | 0.9 | 181.7 | 0.17 | 0.06 | 0.15 | 0.05 | -0.15 | -0.66 |
| 57214 | CEMIP | 4 | Power | 4.9 | 1 | 112.8 | 0.07 | 0.11 | 0.25 | 0.17 | 0.03 | -0.82 |
| 3696 | ITGB8 | 4 | Power | 4.9 | 0.9 | 226.1 | 0.11 | 0.03 | 0.11 | 0.05 | 0.11 | -0.58 |
| 5054 | SERPINE1 | 4 | Poly 2 | 3.9 | 0.4 | 402.9 | 0.21 | 0.09 | 0.27 | 0.20 | 0.09 | -0.64 |
| 60468 | BACH2 | 4 | Linear | 2.9 | 0.8 | -9.3 | 0.12 | 0.05 | 0.11 | 0.12 | -0.06 | -0.43 |
| 55603 | FAM46A | 4 | Linear | 2.1 | 0.8 | 105.9 | 0.06 | 0.01 | 0.06 | -0.04 | -0.13 | -0.67 |
| 55240 | STEAP3 | 4 | Exp 2 | 1.6 | 0.5 | -17.6 | 0.07 | 0.17 | 0.08 | 0.05 | -0.26 | -0.58 |
| 79083 | MLPH | 4 | Exp 3 | 2.4 | 0.6 | 90.5 | 0.13 | 0.10 | 0.13 | 0.14 | -0.09 | -0.69 |
| 56944 | OLFML3 | 4 | Linear | 1.9 | 0.2 | -9.5 | 0.18 | 0.21 | 0.11 | 0.05 | -0.13 | -0.64 |
| 5999 | RGS4 | 4 | Power | 4.9 | 0.1 | 197.1 | -0.09 | -0.02 | 0.02 | 0.28 | 0.26 | -0.88 |
| 6513 | SLC2A1 | 4 | Linear | 1.6 | 0.3 | 237.4 | 0.11 | 0.11 | 0.17 | 0.08 | -0.13 | -0.61 |
| 8609 | KLF7 | 4 | Linear | 2.8 | 0.6 | 184.8 | 0.16 | 0.00 | 0.11 | -0.08 | -0.13 | -0.74 |
| 29126 | CD274 | 4 | Poly 2 | 3.8 | 0.9 | 124.6 | 0.04 | 0.04 | 0.05 | 0.12 | 0.06 | -0.71 |
| 3624 | INHBA | 4 | Poly 2 | 1.3 | 0.3 | 252.3 | -0.05 | 0.12 | 0.24 | 0.07 | 0.41 | -0.64 |
| 164781 | DAW1 | 4 | Power | 4.9 | 1 | 15.6 | 0.04 | 0.07 | 0.03 | 0.02 | 0.05 | -0.50 |
| 51200 | CPA4 | 4 | Poly 2 | 3.6 | 0.9 | 219.5 | 0.04 | 0.11 | 0.09 | 0.05 | 0.00 | -0.63 |
| 58504 | ARHGAP22 | 4 | Exp 3 | 4.4 | 0.9 | 28.6 | 0.05 | 0.11 | 0.03 | 0.06 | 0.01 | -0.45 |
| 56342 | PPAN | 4 | Exp 2 | 3 | 0.7 | 39.9 | 0.10 | 0.12 | 0.13 | 0.05 | -0.23 | -0.47 |
| 6616 | SNAP25 | 4 | Poly 2 | 1.1 | 0.3 | -38.8 | 0.16 | 0.09 | 0.09 | 0.15 | 0.23 | -0.41 |
| 10631 | POSTN | 4 | Exp 2 | 2.7 | 0.2 | 412.7 | 0.25 | 0.36 | 0.31 | -0.07 | -0.23 | -0.75 |
| 9645 | MICAL2 | 4 | Linear | 2.2 | 0.5 | 282.8 | 0.10 | 0.00 | 0.15 | 0.01 | -0.18 | -0.68 |
| 219 | ALDH1B1 | 4 | Poly 3 | 0.6 | 1 | 228.7 | -0.02 | 0.02 | 0.06 | 0.11 | -0.08 | -0.82 |
| 7222 | TRPC3 | 4 | Linear | 3.9 | 0.2 | -14.8 | -0.07 | 0.18 | 0.06 | -0.03 | -0.08 | -0.46 |
| 1009 | CDH11 | 4 | Power | 4.9 | 0.9 | 257.3 | 0.06 | 0.11 | 0.11 | 0.08 | 0.03 | -0.60 |
| 93649 | MYOCD | 4 | Power | 4.8 | 0.8 | 74.6 | 0.02 | -0.06 | 0.08 | 0.08 | -0.07 | -0.93 |
| 27242 | TNFRSF21 | 4 | Linear | 3.1 | 0.8 | 41.6 | 0.14 | 0.10 | 0.17 | -0.03 | -0.13 | -0.55 |
| 133 | ADM | 4 | Linear | 3.5 | 0.5 | 228.8 | 0.16 | 0.23 | 0.09 | 0.22 | 0.00 | -0.63 |
| 9510 | ADAMTS1 | 4 | Poly 2 | 3.8 | 0.9 | 245.9 | 0.07 | 0.13 | 0.21 | 0.10 | 0.08 | -0.83 |
| 11096 | ADAMTS5 | 4 | Poly 2 | 4.5 | 0.9 | 212.8 | 0.02 | 0.07 | 0.16 | -0.01 | 0.01 | -0.68 |
| 56911 | MAP3K7CL | 4 | Power | 4.8 | 0.8 | 133.8 | 0.02 | -0.03 | 0.06 | 0.08 | 0.08 | -0.58 |
| 153769 | SH3RF2 | 4 | Power | 5 | 1 | 74.6 | 0.07 | 0.01 | 0.06 | 0.05 | 0.05 | -0.51 |
| 392255 | GDF6 | 4 | Poly 2 | 3.4 | 0.6 | 184.4 | 0.16 | 0.19 | 0.22 | 0.14 | 0.07 | -0.91 |
| 9162 | DGKI | 4 | Linear | 2.3 | 0.7 | 73.4 | 0.06 | 0.00 | 0.08 | 0.02 | -0.16 | -0.53 |
| 7498 | XDH | 4 | Exp 3 | 3.2 | 0.8 | 27.8 | 0.05 | 0.04 | 0.14 | 0.13 | -0.05 | -0.60 |
| 70 | ACTC1 | 4 | Power | 5 | 0.9 | 275.3 | 0.03 | -0.05 | 0.12 | 0.03 | -0.02 | -0.65 |
| 79442 | LRRC2 | 4 | Poly 2 | 4.1 | 0 | -33.6 | 0.06 | 0.19 | 0.09 | 0.19 | 0.12 | -0.40 |
| 10252 | SPRY1 | 4 | Power | 4.9 | 0.7 | 3.6 | 0.16 | 0.00 | 0.19 | 0.11 | 0.02 | -0.53 |
| 168667 | BMPER | 4 | Power | 4.9 | 1 | -41 | -0.03 | -0.01 | 0.07 | 0.04 | 0.02 | -0.43 |
| 2668 | GDNF | 4 | Exp 2 | 2.4 | 0.2 | 121.7 | 0.27 | 0.24 | 0.34 | -0.03 | -0.15 | -0.63 |
| 9915 | ARNT2 | 4 | Exp 2 | 2.5 | 0.8 | 156.4 | 0.22 | 0.05 | 0.18 | 0.00 | -0.25 | -0.77 |
| 80324 | PUS1 | 4 | Linear | 2.4 | 0.5 | 119.5 | 0.07 | 0.09 | 0.14 | -0.08 | -0.16 | -0.58 |
| 389336 | C5orf46 | 4 | Poly 2 | 3.5 | 0.3 | 99.2 | 0.05 | 0.09 | -0.02 | 0.17 | -0.05 | -0.68 |
| 5021 | OXTR | 4 | Poly 2 | 4.1 | 0.8 | 193.7 | -0.02 | 0.10 | 0.11 | 0.18 | 0.18 | -0.78 |
| 50863 | NTM | 4 | Linear | 4.7 | 0.6 | 13.9 | 0.04 | 0.15 | 0.21 | -0.02 | -0.16 | -0.40 |
| 84206 | MEX3B | 4 | Exp 2 | 2 | 0.6 | 77.1 | 0.11 | 0.11 | 0.08 | -0.10 | -0.16 | -0.56 |
| 3861 | KRT14 | 4 | Linear | 3.3 | 0.9 | 44.4 | 0.06 | 0.02 | 0.17 | 0.06 | -0.16 | -0.71 |
| 84570 | COL25A1 | 4 | Exp 2 | 4.3 | 0.7 | 37.5 | 0.21 | 0.12 | 0.16 | 0.15 | -0.12 | -0.46 |
| 400221 | FLJ22447 | 4 | Poly 2 | 4.2 | 0.8 | -71 | 0.07 | 0.01 | -0.01 | 0.02 | 0.00 | -0.39 |
| 285958 | SNHG15 | 4 | Linear | 3.4 | 0.9 | 163 | 0.03 | 0.08 | -0.01 | 0.10 | -0.09 | -0.59 |
| 100506697 | LINC00327 | 4 | Poly 2 | 4.7 | 0.5 | 82.2 | -0.08 | 0.01 | 0.00 | 0.10 | 0.15 | -0.56 |
| NA | NA | 4 | Poly 2 | 4.4 | 0.9 | 18.6 | 0.01 | 0.05 | 0.01 | 0.13 | 0.14 | -0.49 |
| 2939 | GSTA2 | 4 | Power | 3.1 | 0.5 | -58.3 | 0.08 | 0.06 | 0.01 | 0.11 | -0.05 | -0.49 |
| 5032 | P2RY11 | 4 | Linear | 4.3 | 0.3 | -6.4 | -0.06 | 0.16 | 0.13 | -0.11 | -0.03 | -0.40 |
| NA | NA | 4 | Exp 2 | 3.2 | 0.7 | 208.2 | 0.27 | 0.05 | 0.18 | -0.10 | -0.22 | -0.71 |
| NA | NA | 4 | Poly 3 | 2.7 | 0.2 | 71.5 | 0.05 | 0.43 | -0.03 | -0.24 | -0.09 | -0.48 |
| 51491 | NOP16 | 4 | NA | NA | NA | NA | 0.00 | 0.07 | 0.07 | 0.08 | -0.03 | -0.54 |
| 1301 | COL11A1 | 4 | NA | NA | NA | NA | 0.14 | 0.32 | 0.25 | 0.04 | 0.00 | -0.46 |
| 11178 | LZTS1 | 4 | NA | NA | NA | NA | 0.15 | 0.14 | 0.14 | 0.03 | -0.19 | -0.51 |
| 5214 | PFKP | 4 | NA | NA | NA | NA | 0.13 | 0.15 | 0.13 | 0.13 | -0.05 | -0.39 |
| 1316 | KLF6 | 4 | NA | NA | NA | NA | 0.05 | 0.14 | 0.29 | -0.08 | 0.03 | -0.42 |
| 221395 | ADGRF5 | 4 | NA | NA | NA | NA | 0.02 | 0.02 | 0.12 | 0.23 | 0.22 | -0.46 |
| 29995 | LMCD1 | 4 | NA | NA | NA | NA | 0.09 | 0.07 | 0.19 | 0.15 | 0.14 | -0.38 |
| 28951 | TRIB2 | 4 | NA | NA | NA | NA | 0.13 | 0.04 | 0.18 | 0.15 | 0.18 | -0.43 |
| 11343 | MGLL | 4 | NA | NA | NA | NA | 0.11 | 0.12 | 0.18 | 0.09 | 0.01 | -0.47 |
| 790 | CAD | 4 | NA | NA | NA | NA | 0.21 | 0.15 | 0.27 | -0.04 | -0.27 | -0.38 |
| 22795 | NID2 | 4 | NA | NA | NA | NA | 0.19 | 0.15 | 0.17 | -0.06 | -0.09 | -0.38 |
| 3912 | LAMB1 | 4 | NA | NA | NA | NA | 0.02 | 0.05 | 0.10 | 0.05 | -0.11 | -0.49 |
| 55573 | CDV3 | 4 | NA | NA | NA | NA | 0.01 | 0.10 | 0.08 | 0.05 | 0.02 | -0.42 |
| 1808 | DPYSL2 | 4 | NA | NA | NA | NA | 0.19 | 0.12 | 0.13 | -0.02 | -0.24 | -0.55 |
| 7078 | TIMP3 | 4 | NA | NA | NA | NA | 0.15 | 0.08 | 0.15 | 0.14 | 0.17 | -0.56 |
| 4627 | MYH9 | 4 | NA | NA | NA | NA | 0.30 | 0.28 | 0.39 | -0.01 | 0.00 | -0.21 |
| 4522 | MTHFD1 | 4 | NA | NA | NA | NA | 0.11 | 0.12 | 0.18 | -0.03 | -0.20 | -0.50 |
| 182 | JAG1 | 4 | NA | NA | NA | NA | 0.09 | 0.08 | 0.24 | 0.19 | 0.24 | -0.40 |
| 858 | CAV2 | 4 | NA | NA | NA | NA | -0.04 | 0.04 | 0.01 | -0.01 | 0.17 | -0.38 |
| 4232 | MEST | 4 | NA | NA | NA | NA | 0.14 | 0.10 | 0.09 | 0.06 | -0.09 | -0.46 |
| 23189 | KANK1 | 4 | NA | NA | NA | NA | 0.08 | 0.08 | 0.14 | 0.09 | 0.03 | -0.40 |
| 7422 | VEGFA | 4 | NA | NA | NA | NA | 0.16 | 0.06 | 0.11 | -0.15 | -0.14 | -0.40 |
| 4883 | NPR3 | 4 | NA | NA | NA | NA | 0.00 | 0.07 | 0.11 | 0.21 | 0.30 | -0.52 |
| 7474 | WNT5A | 4 | NA | NA | NA | NA | -0.03 | 0.00 | 0.07 | 0.06 | 0.07 | -0.42 |
| 4691 | NCL | 4 | NA | NA | NA | NA | 0.08 | 0.54 | 0.37 | -0.15 | 0.02 | -0.27 |
| 2335 | FN1 | 4 | NA | NA | NA | NA | 0.30 | 0.03 | 0.21 | 0.01 | -0.26 | -0.50 |
| 81849 | ST6GALNAC5 | 4 | NA | NA | NA | NA | -0.03 | -0.01 | 0.08 | 0.04 | 0.07 | -0.43 |
| 10849 | CD3EAP | 4 | NA | NA | NA | NA | 0.11 | 0.22 | 0.15 | 0.11 | 0.13 | -0.47 |
| 6446 | SGK1 | 4 | NA | NA | NA | NA | 0.03 | 0.02 | 0.10 | 0.19 | 0.25 | -0.46 |
| 1490 | CTGF | 4 | NA | NA | NA | NA | 0.01 | 0.17 | 0.25 | 0.17 | 0.23 | -0.42 |
| 7045 | TGFBI | 4 | NA | NA | NA | NA | 0.11 | 0.13 | 0.13 | 0.07 | -0.23 | -0.50 |
| 4879 | NPPB | 4 | NA | NA | NA | NA | 0.02 | 0.00 | 0.17 | 0.26 | 0.25 | -0.44 |
| 800 | CALD1 | 4 | NA | NA | NA | NA | -0.06 | 0.10 | 0.07 | 0.00 | 0.09 | -0.39 |
| 1948 | EFNB2 | 4 | NA | NA | NA | NA | 0.09 | 0.07 | 0.17 | 0.03 | 0.03 | -0.43 |
| 6662 | SOX9 | 4 | NA | NA | NA | NA | 0.38 | -0.12 | 0.20 | -0.02 | -0.05 | -0.40 |
| 5787 | PTPRB | 4 | NA | NA | NA | NA | -0.03 | -0.02 | 0.14 | 0.09 | 0.02 | -0.50 |
| 8445 | DYRK2 | 4 | NA | NA | NA | NA | -0.01 | 0.03 | 0.06 | 0.00 | -0.02 | -0.41 |
| 7277 | TUBA4A | 4 | NA | NA | NA | NA | 0.13 | 0.10 | 0.10 | 0.03 | -0.14 | -0.42 |
| 3976 | LIF | 4 | NA | NA | NA | NA | 0.06 | 0.10 | 0.17 | 0.13 | 0.26 | -0.41 |
| 1854 | DUT | 4 | NA | NA | NA | NA | 0.09 | 0.15 | 0.13 | -0.04 | -0.10 | -0.44 |
| 1289 | COL5A1 | 4 | NA | NA | NA | NA | 0.27 | 0.25 | 0.28 | 0.02 | -0.26 | -0.49 |
| 23180 | RFTN1 | 4 | NA | NA | NA | NA | 0.07 | 0.00 | 0.05 | 0.13 | -0.08 | -0.40 |
| 10514 | MYBBP1A | 4 | NA | NA | NA | NA | 0.31 | 0.24 | 0.22 | 0.00 | -0.17 | -0.47 |
| 10100 | TSPAN2 | 4 | NA | NA | NA | NA | -0.03 | 0.00 | 0.06 | 0.04 | 0.07 | -0.43 |
| 4803 | NGF | 4 | NA | NA | NA | NA | 0.11 | -0.03 | 0.00 | 0.03 | 0.01 | -0.39 |
| 8728 | ADAM19 | 4 | NA | NA | NA | NA | 0.05 | 0.12 | 0.16 | 0.01 | -0.05 | -0.42 |
| 3855 | KRT7 | 4 | NA | NA | NA | NA | 0.14 | 0.18 | 0.15 | 0.16 | 0.02 | -0.49 |
| 92856 | IMP4 | 4 | NA | NA | NA | NA | 0.09 | 0.10 | 0.08 | 0.02 | -0.24 | -0.48 |
| 4609 | MYC | 4 | NA | NA | NA | NA | 0.40 | 0.31 | 0.35 | 0.09 | 0.05 | -0.48 |
| 7057 | THBS1 | 4 | NA | NA | NA | NA | -0.01 | 0.05 | 0.18 | 0.20 | 0.26 | -0.56 |
| 8412 | BCAR3 | 4 | NA | NA | NA | NA | 0.13 | 0.08 | 0.12 | 0.10 | -0.04 | -0.53 |
| 26509 | MYOF | 4 | NA | NA | NA | NA | 0.06 | 0.02 | 0.13 | 0.01 | -0.16 | -0.45 |
| 7090 | TLE3 | 4 | NA | NA | NA | NA | 0.19 | 0.08 | 0.16 | -0.06 | -0.17 | -0.51 |
| 7371 | UCK2 | 4 | NA | NA | NA | NA | 0.08 | 0.11 | 0.16 | -0.03 | -0.17 | -0.49 |
| 2312 | FLG | 4 | NA | NA | NA | NA | 0.17 | 0.27 | 0.34 | 0.22 | 0.20 | -0.51 |
| 57007 | ACKR3 | 4 | NA | NA | NA | NA | 0.07 | -0.03 | 0.07 | 0.02 | 0.01 | -0.46 |
| 26018 | LRIG1 | 4 | NA | NA | NA | NA | 0.03 | 0.05 | 0.10 | 0.09 | -0.05 | -0.53 |
| 51316 | PLAC8 | 4 | NA | NA | NA | NA | 0.03 | 0.07 | -0.04 | 0.05 | 0.01 | -0.44 |
| 135293 | PM20D2 | 4 | NA | NA | NA | NA | -0.03 | 0.04 | 0.02 | 0.03 | 0.10 | -0.39 |
| 154214 | RNF217 | 4 | NA | NA | NA | NA | 0.04 | 0.03 | 0.08 | -0.10 | 0.00 | -0.38 |
| 8091 | HMGA2 | 4 | NA | NA | NA | NA | 0.04 | 0.00 | 0.03 | -0.02 | 0.02 | -0.44 |
| 84159 | ARID5B | 4 | NA | NA | NA | NA | 0.13 | -0.05 | 0.08 | -0.01 | 0.05 | -0.41 |
| 2697 | GJA1 | 4 | NA | NA | NA | NA | 0.07 | 0.13 | 0.10 | -0.03 | -0.04 | -0.47 |
| 9955 | HS3ST3A1 | 4 | NA | NA | NA | NA | 0.06 | 0.05 | 0.04 | 0.04 | -0.05 | -0.43 |
| 4643 | MYO1E | 4 | NA | NA | NA | NA | 0.11 | 0.05 | 0.11 | 0.08 | -0.06 | -0.49 |
| 2114 | ETS2 | 4 | NA | NA | NA | NA | 0.05 | 0.07 | 0.05 | 0.05 | -0.05 | -0.40 |
| 4047 | LSS | 4 | NA | NA | NA | NA | 0.18 | 0.17 | 0.14 | -0.03 | -0.22 | -0.42 |
| 54865 | GPATCH4 | 4 | NA | NA | NA | NA | -0.03 | 0.29 | 0.11 | -0.10 | -0.02 | -0.39 |
| 10611 | PDLIM5 | 4 | NA | NA | NA | NA | 0.06 | -0.02 | 0.08 | 0.04 | 0.03 | -0.40 |
| 1278 | COL1A2 | 4 | NA | NA | NA | NA | 0.29 | 0.17 | 0.23 | 0.02 | -0.31 | -0.44 |
| 10395 | DLC1 | 4 | NA | NA | NA | NA | 0.23 | 0.01 | 0.19 | 0.01 | -0.09 | -0.39 |
| 4783 | NFIL3 | 4 | NA | NA | NA | NA | 0.01 | 0.09 | 0.10 | 0.00 | -0.15 | -0.49 |
| 170689 | ADAMTS15 | 4 | NA | NA | NA | NA | 0.11 | 0.13 | 0.23 | 0.15 | 0.18 | -0.40 |
| 23255 | MTCL1 | 4 | NA | NA | NA | NA | 0.07 | 0.07 | 0.09 | -0.03 | -0.08 | -0.52 |
| 1281 | COL3A1 | 4 | NA | NA | NA | NA | 0.09 | 0.13 | 0.11 | 0.07 | -0.10 | -0.53 |
| 3622 | ING2 | 4 | NA | NA | NA | NA | -0.01 | 0.16 | 0.04 | 0.06 | -0.02 | -0.39 |
| 10098 | TSPAN5 | 4 | NA | NA | NA | NA | 0.09 | 0.08 | 0.17 | 0.02 | -0.09 | -0.47 |
| 5209 | PFKFB3 | 4 | NA | NA | NA | NA | 0.22 | 0.15 | 0.27 | 0.02 | -0.06 | -0.43 |
| 596 | BCL2 | 4 | NA | NA | NA | NA | 0.01 | -0.01 | 0.10 | 0.00 | 0.07 | -0.44 |
| 79660 | PPP1R3B | 4 | NA | NA | NA | NA | 0.03 | -0.05 | 0.10 | 0.13 | 0.21 | -0.40 |
| 285704 | RGMB | 4 | NA | NA | NA | NA | 0.09 | 0.01 | 0.10 | -0.01 | -0.08 | -0.43 |
| 5174 | PDZK1 | 4 | NA | NA | NA | NA | 0.00 | 0.09 | 0.03 | 0.08 | 0.07 | -0.45 |
| 2303 | FOXC2 | 4 | NA | NA | NA | NA | 0.11 | 0.14 | 0.27 | -0.14 | -0.11 | -0.46 |
| 627 | BDNF | 4 | NA | NA | NA | NA | 0.01 | 0.04 | 0.03 | 0.04 | 0.06 | -0.56 |
| 23212 | RRS1 | 4 | NA | NA | NA | NA | 0.21 | 0.23 | 0.21 | 0.00 | -0.12 | -0.50 |
| 79077 | DCTPP1 | 4 | NA | NA | NA | NA | 0.04 | 0.02 | 0.10 | 0.08 | -0.14 | -0.48 |
| 7026 | NR2F2 | 4 | NA | NA | NA | NA | 0.19 | 0.19 | 0.18 | -0.07 | 0.04 | -0.51 |
| 2650 | GCNT1 | 4 | NA | NA | NA | NA | -0.02 | 0.05 | 0.06 | 0.08 | 0.09 | -0.42 |
| 3182 | HNRNPAB | 4 | NA | NA | NA | NA | 0.03 | 0.26 | 0.17 | -0.06 | -0.07 | -0.38 |
| 57194 | ATP10A | 4 | NA | NA | NA | NA | 0.04 | 0.06 | 0.09 | 0.10 | -0.14 | -0.54 |
| 81606 | LBH | 4 | NA | NA | NA | NA | -0.01 | 0.02 | 0.13 | 0.26 | 0.39 | -0.39 |
| 207107 | SFTA1P | 4 | NA | NA | NA | NA | 0.02 | 0.14 | 0.04 | 0.26 | 0.15 | -0.43 |
| 84627 | ZNF469 | 4 | NA | NA | NA | NA | 0.23 | 0.11 | 0.31 | 0.04 | -0.25 | -0.50 |
| NA | NA | 4 | NA | NA | NA | NA | -0.11 | -0.03 | 0.15 | 0.13 | 0.14 | -0.39 |
| 2297 | FOXD1 | 4 | NA | NA | NA | NA | 0.00 | 0.13 | 0.04 | -0.04 | -0.03 | -0.39 |
| NA | NA | 4 | NA | NA | NA | NA | 0.10 | 0.05 | -0.09 | 0.08 | 0.07 | -0.39 |
| NA | NA | 4 | NA | NA | NA | NA | -0.01 | 0.12 | 0.12 | 0.10 | 0.15 | -0.38 |
| NA | NA | 4 | NA | NA | NA | NA | -0.10 | 0.11 | 0.20 | 0.04 | 0.00 | -0.42 |
| NA | NA | 4 | NA | NA | NA | NA | 0.28 | 0.08 | 0.22 | -0.06 | -0.16 | -0.59 |
| NA | NA | 4 | NA | NA | NA | NA | 0.15 | 0.96 | -0.03 | -0.27 | 0.11 | -0.40 |
| 284098 | PIGW | 4 | NA | NA | NA | NA | 0.02 | 0.06 | 0.11 | -0.01 | -0.18 | -0.49 |
| 115703 | ARHGAP33 | 5 | NA | NA | NA | NA | 0.22 | -0.13 | 0.01 | -0.31 | -0.38 | 0.10 |
| 1387 | CREBBP | 5 | NA | NA | NA | NA | 0.40 | 0.09 | 0.22 | -0.08 | -0.21 | 0.21 |
| 4784 | NFIX | 5 | NA | NA | NA | NA | 0.41 | 0.16 | 0.27 | -0.09 | -0.15 | 0.00 |
| 79567 | FAM65A | 5 | NA | NA | NA | NA | 0.42 | -0.10 | 0.00 | 0.04 | -0.29 | -0.11 |
| 55810 | FOXJ2 | 5 | NA | NA | NA | NA | 0.37 | -0.09 | 0.09 | -0.15 | -0.51 | -0.16 |
| 80347 | COASY | 5 | NA | NA | NA | NA | 0.43 | -0.02 | 0.18 | -0.15 | -0.39 | -0.03 |
| 2736 | GLI2 | 5 | NA | NA | NA | NA | 0.35 | 0.00 | 0.14 | -0.17 | -0.44 | -0.33 |
| 25930 | PTPN23 | 5 | NA | NA | NA | NA | 0.37 | -0.05 | 0.00 | -0.08 | -0.41 | -0.16 |
| 5362 | PLXNA2 | 5 | NA | NA | NA | NA | 0.32 | 0.15 | 0.38 | 0.00 | -0.01 | -0.10 |
| 23152 | CIC | 5 | NA | NA | NA | NA | 0.39 | 0.04 | 0.15 | -0.19 | -0.35 | -0.04 |
| 4849 | CNOT3 | 5 | NA | NA | NA | NA | 0.47 | 0.07 | 0.25 | -0.20 | -0.29 | 0.17 |
| 10291 | SF3A1 | 5 | NA | NA | NA | NA | 0.47 | 0.01 | 0.28 | -0.12 | -0.28 | 0.14 |
| 80020 | FOXRED2 | 5 | NA | NA | NA | NA | 0.21 | -0.03 | -0.04 | -0.29 | -0.42 | 0.20 |
| 4605 | MYBL2 | 5 | NA | NA | NA | NA | 0.48 | 0.16 | 0.28 | -0.16 | -0.30 | -0.12 |
| 10398 | MYL9 | 5 | NA | NA | NA | NA | 0.77 | 0.08 | 0.40 | -0.42 | -0.71 | -0.29 |
| 55697 | VAC14 | 5 | NA | NA | NA | NA | 0.38 | -0.03 | 0.11 | -0.25 | -0.53 | -0.13 |
| 8175 | SF3A2 | 5 | NA | NA | NA | NA | 0.31 | -0.01 | 0.06 | -0.38 | -0.43 | -0.09 |
| 6217 | RPS16 | 5 | NA | NA | NA | NA | 0.96 | 0.90 | 1.04 | -0.43 | -0.56 | 0.10 |
| 23094 | SIPA1L3 | 5 | NA | NA | NA | NA | 0.39 | 0.02 | 0.18 | -0.14 | -0.32 | -0.11 |
| 2022 | ENG | 5 | NA | NA | NA | NA | 0.41 | -0.09 | 0.12 | -0.19 | -0.45 | -0.10 |
| 57178 | ZMIZ1 | 5 | NA | NA | NA | NA | 0.48 | -0.08 | 0.09 | -0.14 | -0.48 | -0.39 |
| 23125 | CAMTA2 | 5 | NA | NA | NA | NA | 0.37 | 0.00 | 0.01 | -0.14 | -0.49 | -0.15 |
| 1277 | COL1A1 | 5 | NA | NA | NA | NA | 0.69 | 0.11 | 0.37 | -0.17 | -0.76 | -0.57 |
| 57649 | PHF12 | 5 | NA | NA | NA | NA | 0.39 | -0.13 | 0.04 | -0.23 | -0.43 | 0.07 |
| 79080 | CCDC86 | 5 | NA | NA | NA | NA | 0.41 | 0.37 | 0.40 | -0.04 | -0.28 | -0.31 |
| 5818 | NECTIN1 | 5 | NA | NA | NA | NA | 0.36 | 0.02 | 0.11 | -0.20 | -0.42 | -0.30 |
| 1822 | ATN1 | 5 | NA | NA | NA | NA | 0.42 | 0.16 | 0.11 | -0.09 | -0.12 | -0.05 |
| 57666 | FBRSL1 | 5 | NA | NA | NA | NA | 0.22 | 0.16 | 0.22 | -0.23 | -0.38 | -0.26 |
| 4209 | MEF2D | 5 | NA | NA | NA | NA | 0.44 | -0.06 | 0.13 | -0.19 | -0.30 | 0.11 |
| 4811 | NID1 | 5 | NA | NA | NA | NA | 0.42 | 0.00 | 0.13 | -0.09 | -0.34 | -0.11 |
| 8289 | ARID1A | 5 | NA | NA | NA | NA | 0.53 | -0.05 | 0.15 | -0.19 | -0.50 | -0.19 |
| 56243 | KIAA1217 | 5 | NA | NA | NA | NA | 0.41 | -0.01 | 0.14 | -0.18 | -0.38 | 0.07 |
| 1958 | EGR1 | 5 | NA | NA | NA | NA | 0.47 | 0.09 | 0.23 | -0.08 | -0.25 | -0.14 |
| 10174 | SORBS3 | 5 | NA | NA | NA | NA | 0.53 | -0.13 | 0.06 | -0.20 | -0.60 | -0.19 |
| 83637 | ZMIZ2 | 5 | NA | NA | NA | NA | 0.38 | 0.10 | 0.25 | -0.22 | -0.26 | 0.04 |
| 8603 | FAM193A | 5 | NA | NA | NA | NA | 0.39 | 0.00 | 0.11 | -0.06 | -0.15 | 0.15 |
| 57479 | PRR12 | 5 | NA | NA | NA | NA | 0.51 | 0.10 | 0.14 | -0.13 | -0.31 | 0.04 |
| 27245 | AHDC1 | 5 | NA | NA | NA | NA | 0.50 | 0.06 | 0.32 | -0.17 | -0.33 | 0.13 |
| 79924 | ADM2 | 5 | NA | NA | NA | NA | 0.27 | 0.05 | 0.10 | -0.23 | -0.44 | -0.18 |
| 57572 | DOCK6 | 5 | NA | NA | NA | NA | 0.42 | -0.21 | 0.07 | -0.17 | -0.41 | -0.01 |
| 5989 | RFX1 | 5 | NA | NA | NA | NA | 0.39 | 0.13 | 0.23 | -0.09 | -0.29 | 0.15 |
| 54862 | CC2D1A | 5 | NA | NA | NA | NA | 0.41 | 0.01 | 0.17 | -0.20 | -0.21 | 0.27 |
| 60678 | EEFSEC | 5 | NA | NA | NA | NA | 0.18 | -0.11 | 0.11 | -0.17 | -0.42 | -0.08 |
| 57224 | NHSL1 | 5 | NA | NA | NA | NA | 0.28 | -0.04 | 0.04 | -0.29 | -0.39 | -0.19 |
| 23148 | NACAD | 5 | NA | NA | NA | NA | 0.39 | -0.19 | -0.02 | -0.15 | -0.39 | 0.09 |
| 7020 | TFAP2A | 5 | NA | NA | NA | NA | 0.38 | 0.03 | 0.17 | -0.25 | -0.32 | -0.37 |
| 9656 | MDC1 | 5 | NA | NA | NA | NA | 0.50 | -0.06 | 0.15 | -0.12 | -0.42 | 0.01 |
| 6176 | RPLP1 | 5 | NA | NA | NA | NA | 0.53 | 0.42 | 0.50 | -0.16 | -0.15 | 0.07 |
| 10579 | TACC2 | 5 | NA | NA | NA | NA | 0.44 | -0.04 | 0.16 | -0.17 | -0.30 | 0.02 |
| 471 | ATIC | 5 | NA | NA | NA | NA | 0.36 | 0.43 | 0.53 | 0.08 | -0.30 | -0.14 |
| 23067 | SETD1B | 5 | NA | NA | NA | NA | 0.45 | 0.01 | 0.20 | -0.15 | -0.34 | -0.05 |
| 55114 | ARHGAP17 | 5 | NA | NA | NA | NA | 0.37 | -0.19 | 0.03 | -0.09 | -0.39 | -0.07 |
| 4782 | NFIC | 5 | NA | NA | NA | NA | 0.58 | -0.04 | 0.13 | -0.18 | -0.42 | -0.24 |
| 3339 | HSPG2 | 5 | NA | NA | NA | NA | 0.50 | 0.27 | 0.44 | -0.01 | -0.25 | -0.04 |
| 5546 | PRCC | 5 | NA | NA | NA | NA | 0.34 | 0.00 | 0.13 | -0.21 | -0.41 | -0.01 |
| 22838 | RNF44 | 5 | NA | NA | NA | NA | 0.43 | 0.08 | 0.15 | -0.17 | -0.26 | 0.26 |
| 25792 | CIZ1 | 5 | NA | NA | NA | NA | 0.41 | 0.20 | 0.24 | -0.17 | -0.25 | 0.06 |
| 4900 | NRGN | 5 | NA | NA | NA | NA | 0.34 | -0.17 | 0.03 | -0.32 | -0.41 | -0.04 |
| 64319 | FBRS | 5 | NA | NA | NA | NA | 0.42 | -0.07 | 0.01 | -0.18 | -0.39 | 0.15 |
| 90993 | CREB3L1 | 5 | NA | NA | NA | NA | 0.36 | -0.07 | -0.04 | -0.13 | -0.40 | -0.18 |
| 114991 | ZNF618 | 5 | NA | NA | NA | NA | 0.26 | -0.04 | 0.13 | -0.23 | -0.39 | 0.00 |
| 79856 | SNX22 | 5 | NA | NA | NA | NA | 0.48 | -0.12 | 0.01 | -0.22 | -0.11 | 0.14 |
| 7791 | ZYX | 5 | NA | NA | NA | NA | 0.46 | 0.19 | 0.29 | -0.16 | -0.42 | -0.35 |
| 125950 | RAVER1 | 5 | NA | NA | NA | NA | 0.33 | 0.05 | 0.18 | -0.15 | -0.50 | -0.02 |
| 10482 | NXF1 | 5 | NA | NA | NA | NA | 0.53 | 0.13 | 0.27 | -0.20 | -0.30 | 0.25 |
| 84447 | SYVN1 | 5 | NA | NA | NA | NA | 0.44 | 0.19 | 0.23 | -0.12 | -0.23 | 0.23 |
| 476 | ATP1A1 | 5 | NA | NA | NA | NA | 0.48 | 0.37 | 0.53 | -0.10 | -0.27 | -0.15 |
| 26508 | HEYL | 5 | NA | NA | NA | NA | 0.38 | -0.03 | 0.02 | -0.08 | -0.40 | -0.25 |
| 10370 | CITED2 | 5 | NA | NA | NA | NA | 0.42 | 0.18 | 0.24 | -0.07 | -0.01 | -0.25 |
| 6297 | SALL2 | 5 | NA | NA | NA | NA | 0.39 | -0.02 | 0.09 | -0.09 | -0.29 | 0.33 |
| 9640 | ZNF592 | 5 | NA | NA | NA | NA | 0.39 | -0.11 | 0.10 | -0.16 | -0.30 | -0.04 |
| 114785 | MBD6 | 5 | NA | NA | NA | NA | 0.42 | -0.02 | 0.05 | -0.13 | -0.32 | 0.02 |
| 126306;105372240 | JSRP1;LOC105372240 | 5 | NA | NA | NA | NA | 0.42 | -0.03 | -0.17 | -0.33 | -0.18 | -0.11 |
| 64223 | MLST8 | 5 | NA | NA | NA | NA | 0.41 | 0.29 | 0.29 | -0.26 | -0.33 | -0.01 |
| 80346 | REEP4 | 5 | NA | NA | NA | NA | 0.31 | -0.06 | 0.12 | -0.21 | -0.21 | 0.38 |
| 11273 | ATXN2L | 5 | NA | NA | NA | NA | 0.43 | 0.01 | 0.08 | -0.18 | -0.48 | -0.03 |
| 3054 | HCFC1 | 5 | NA | NA | NA | NA | 0.48 | 0.00 | 0.13 | -0.10 | -0.38 | -0.08 |
| 4615 | MYD88 | 5 | NA | NA | NA | NA | 0.38 | 0.32 | 0.50 | -0.24 | -0.48 | 0.15 |
| 55731 | FAM222B | 5 | NA | NA | NA | NA | 0.38 | -0.11 | 0.01 | -0.34 | -0.44 | -0.04 |
| 488 | ATP2A2 | 5 | NA | NA | NA | NA | 0.39 | -0.24 | 0.02 | -0.11 | -0.29 | -0.10 |
| 254263 | CNIH2 | 5 | NA | NA | NA | NA | 0.10 | -0.07 | -0.06 | -0.14 | -0.42 | 0.05 |
| 113829 | SLC35A4 | 5 | NA | NA | NA | NA | 0.29 | 0.02 | 0.08 | -0.22 | -0.44 | -0.09 |
| 6666 | SOX12 | 5 | NA | NA | NA | NA | 0.35 | 0.08 | 0.23 | -0.28 | -0.38 | -0.15 |
| 633 | BGN | 5 | NA | NA | NA | NA | 0.49 | 0.33 | 0.20 | -0.14 | -0.52 | -0.19 |
| 2275 | FHL3 | 5 | NA | NA | NA | NA | 0.43 | 0.01 | 0.21 | -0.24 | -0.41 | 0.01 |
| 283149 | BCL9L | 5 | NA | NA | NA | NA | 0.56 | 0.05 | 0.17 | -0.14 | -0.32 | -0.01 |
| 284325 | C19orf54 | 5 | NA | NA | NA | NA | 0.47 | 0.07 | 0.21 | -0.14 | -0.12 | 0.11 |
| 9612 | NCOR2 | 5 | NA | NA | NA | NA | 0.38 | 0.22 | 0.33 | 0.00 | -0.18 | -0.12 |
| 23054 | NCOA6 | 5 | NA | NA | NA | NA | 0.42 | -0.04 | 0.10 | -0.16 | -0.39 | 0.03 |
| 9909 | DENND4B | 5 | NA | NA | NA | NA | 0.25 | 0.09 | 0.15 | -0.19 | -0.40 | -0.25 |
| 26832 | RNU5B-1 | 5 | NA | NA | NA | NA | 0.46 | -0.15 | -0.10 | -0.12 | -0.13 | 0.14 |
| 677846 | SNORA80A | 5 | NA | NA | NA | NA | 0.40 | 0.03 | -0.03 | 0.12 | -0.32 | 0.18 |
| 6084 | RNY1 | 5 | NA | NA | NA | NA | 0.83 | 0.34 | -0.17 | -0.28 | -0.21 | 0.05 |
| 677808 | SNORA23 | 5 | NA | NA | NA | NA | 0.43 | -0.15 | -0.17 | 0.04 | 0.03 | 0.05 |
| 7916 | PRRC2A | 5 | NA | NA | NA | NA | 0.47 | 0.17 | 0.26 | -0.12 | -0.32 | 0.13 |
| 5514 | PPP1R10 | 5 | NA | NA | NA | NA | 0.48 | -0.15 | 0.07 | -0.18 | -0.42 | 0.08 |
| 642475 | MROH6 | 5 | NA | NA | NA | NA | 0.15 | 0.09 | 0.13 | -0.05 | -0.38 | -0.05 |
| 51157 | ZNF580 | 5 | NA | NA | NA | NA | 0.37 | -0.10 | 0.06 | -0.39 | -0.28 | -0.07 |
| NA | NA | 5 | NA | NA | NA | NA | 0.47 | -0.25 | 0.03 | -0.15 | -0.31 | -0.10 |
| 113178 | SCAMP4 | 5 | NA | NA | NA | NA | 0.44 | -0.07 | 0.13 | -0.24 | -0.50 | 0.03 |
| 100507347 | VIM-AS1 | 5 | NA | NA | NA | NA | 0.65 | -0.17 | -0.05 | -0.20 | -0.24 | -0.18 |
| NA | NA | 5 | NA | NA | NA | NA | 0.00 | 0.05 | -0.01 | -0.40 | -0.04 | 0.16 |
| 677770 | SCARNA22 | 5 | NA | NA | NA | NA | 0.64 | 0.10 | -0.09 | -0.25 | -0.19 | 0.16 |
| NA | NA | 5 | NA | NA | NA | NA | 0.39 | 0.12 | -0.18 | -0.36 | -0.14 | -0.04 |
| NA | NA | 5 | NA | NA | NA | NA | 0.44 | 0.00 | 0.02 | -0.02 | -0.04 | -0.08 |
| NA | NA | 5 | NA | NA | NA | NA | 0.64 | 0.10 | 0.07 | -0.07 | 0.01 | -0.05 |
| NA | NA | 5 | NA | NA | NA | NA | 0.42 | 0.31 | -0.23 | -0.38 | -0.09 | 0.13 |
| 780851 | SNORD3A | 5 | NA | NA | NA | NA | 1.07 | -0.19 | -0.23 | -0.24 | -0.17 | 0.31 |
| NA | NA | 5 | NA | NA | NA | NA | 0.86 | 0.04 | -0.05 | -0.39 | -0.15 | 0.35 |
| 57597 | BAHCC1 | 5 | NA | NA | NA | NA | 0.40 | 0.02 | 0.23 | -0.05 | -0.18 | 0.19 |
| NA | NA | 5 | NA | NA | NA | NA | 0.41 | 0.07 | -0.20 | 0.01 | -0.07 | -0.04 |
| NA | NA | 5 | NA | NA | NA | NA | 0.42 | 0.11 | 0.03 | -0.13 | -0.23 | 0.15 |
| NA | NA | 5 | NA | NA | NA | NA | 0.94 | -0.08 | -0.16 | -0.57 | -0.46 | -0.08 |
| NA | NA | 5 | NA | NA | NA | NA | 0.47 | -0.03 | -0.27 | 0.08 | -0.04 | 0.10 |
| 9757 | KMT2B | 5 | NA | NA | NA | NA | 0.28 | -0.04 | 0.09 | -0.25 | -0.39 | -0.04 |
| NA | NA | 5 | NA | NA | NA | NA | 0.47 | 0.06 | -0.10 | -0.24 | -0.26 | -0.01 |
| NA | NA | 5 | NA | NA | NA | NA | 0.39 | 1.49 | -0.21 | -0.36 | -0.26 | -0.25 |
| 7554 | ZNF8 | 5 | NA | NA | NA | NA | 0.27 | -0.04 | 0.05 | -0.20 | -0.39 | -0.18 |
| NA | NA | 5 | NA | NA | NA | NA | 0.06 | 0.01 | -0.05 | -0.05 | -0.38 | 0.00 |
| NA | NA | 5 | NA | NA | NA | NA | 0.47 | 0.04 | -0.13 | -0.36 | -0.33 | -0.29 |
| NA | NA | 5 | NA | NA | NA | NA | 0.45 | -0.02 | 0.07 | -0.18 | -0.20 | 0.05 |
| NA | NA | 5 | NA | NA | NA | NA | 0.57 | -0.09 | -0.18 | -0.21 | -0.35 | -0.13 |
| 9013 | TAF1C | 6 | Poly 2 | 2.5 | 0.1 | 203.7 | 0.28 | -0.18 | 0.00 | -0.32 | -0.55 | -0.26 |
| 83667 | SESN2 | 6 | Poly 2 | 0.9 | 0.6 | 124.6 | 0.08 | -0.08 | -0.09 | -0.24 | -0.56 | -0.09 |
| 29968 | PSAT1 | 6 | Poly 2 | 1.8 | 0.2 | 350 | 0.22 | -0.24 | -0.03 | -0.41 | -0.76 | -0.58 |
| 6652 | SORD | 6 | Poly 2 | 1.6 | 0.1 | 103.4 | 0.17 | -0.21 | -0.06 | -0.22 | -0.52 | -0.48 |
| 5866 | RAB3IL1 | 6 | Poly 2 | 1.5 | 0.2 | -67 | -0.04 | -0.24 | -0.21 | -0.12 | -0.51 | -0.22 |
| NA | NA | 6 | Poly 2 | 1.3 | 0.8 | -27.9 | 0.01 | -0.12 | -0.03 | -0.12 | -0.38 | -0.07 |
| NA | NA | 6 | Poly 2 | 0.9 | 0.6 | -118.9 | 0.01 | -0.10 | -0.11 | -0.15 | -0.51 | -0.04 |
| NA | NA | 6 | Poly 2 | 1.1 | 0.4 | -101.9 | -0.10 | -0.11 | -0.12 | -0.06 | -0.51 | -0.10 |
| 56108 | PCDHGA7 | 6 | Poly 2 | 1.5 | 0.6 | -49 | 0.06 | -0.12 | -0.13 | -0.09 | -0.41 | 0.04 |
| NA | NA | 6 | Poly 2 | 1.8 | 0.5 | -64.3 | -0.03 | -0.14 | -0.02 | -0.24 | -0.42 | -0.12 |
| 1431 | CS | 6 | NA | NA | NA | NA | 0.29 | -0.15 | -0.04 | -0.14 | -0.52 | -0.30 |
| 602 | BCL3 | 6 | NA | NA | NA | NA | 0.08 | -0.19 | -0.17 | -0.31 | -0.57 | -0.19 |
| 5566 | PRKACA | 6 | NA | NA | NA | NA | 0.48 | -0.24 | -0.09 | -0.19 | -0.51 | -0.09 |
| 56949 | XAB2 | 6 | NA | NA | NA | NA | 0.24 | -0.42 | -0.18 | -0.33 | -0.64 | -0.17 |
| 4313 | MMP2 | 6 | NA | NA | NA | NA | 0.31 | -0.24 | -0.08 | -0.19 | -0.60 | -0.37 |
| 53827 | FXYD5 | 6 | NA | NA | NA | NA | 0.29 | 0.00 | 0.00 | -0.29 | -0.63 | -0.45 |
| 57715 | SEMA4G | 6 | NA | NA | NA | NA | -0.01 | -0.29 | -0.27 | -0.21 | -0.39 | 0.00 |
| 1727 | CYB5R3 | 6 | NA | NA | NA | NA | 0.29 | -0.13 | -0.02 | -0.24 | -0.43 | -0.12 |
| 2033 | EP300 | 6 | NA | NA | NA | NA | 0.39 | -0.26 | -0.04 | -0.14 | -0.43 | -0.04 |
| 51073 | MRPL4 | 6 | NA | NA | NA | NA | 0.33 | -0.11 | 0.02 | -0.21 | -0.43 | -0.23 |
| 2931 | GSK3A | 6 | NA | NA | NA | NA | 0.28 | -0.26 | -0.12 | -0.23 | -0.39 | -0.02 |
| 219699 | UNC5B | 6 | NA | NA | NA | NA | 0.16 | -0.10 | -0.04 | -0.21 | -0.44 | -0.28 |
| 8936 | WASF1 | 6 | NA | NA | NA | NA | 0.20 | -0.32 | -0.20 | -0.25 | -0.41 | -0.30 |
| 607 | BCL9 | 6 | NA | NA | NA | NA | 0.28 | -0.20 | -0.13 | -0.32 | -0.52 | -0.23 |
| 79144 | PPDPF | 6 | NA | NA | NA | NA | 0.32 | -0.25 | -0.16 | -0.43 | -0.64 | -0.31 |
| 79085 | SLC25A23 | 6 | NA | NA | NA | NA | 0.28 | -0.25 | -0.13 | -0.28 | -0.68 | -0.23 |
| 80023 | NRSN2 | 6 | NA | NA | NA | NA | 0.31 | -0.28 | -0.12 | -0.26 | -0.59 | -0.32 |
| 8021 | NUP214 | 6 | NA | NA | NA | NA | 0.26 | -0.22 | -0.01 | -0.17 | -0.40 | -0.15 |
| 9113 | LATS1 | 6 | NA | NA | NA | NA | 0.31 | -0.26 | -0.10 | -0.22 | -0.42 | -0.14 |
| 10197 | PSME3 | 6 | NA | NA | NA | NA | 0.24 | -0.20 | -0.07 | -0.10 | -0.39 | -0.20 |
| 84327 | ZBED3 | 6 | NA | NA | NA | NA | 0.15 | -0.02 | -0.23 | -0.40 | -0.50 | -0.35 |
| 10250 | SRRM1 | 6 | NA | NA | NA | NA | 0.29 | -0.20 | -0.05 | -0.22 | -0.46 | -0.09 |
| 9169 | SCAF11 | 6 | NA | NA | NA | NA | 0.18 | -0.26 | -0.04 | -0.17 | -0.39 | -0.24 |
| 59274 | MESDC1 | 6 | NA | NA | NA | NA | 0.16 | -0.14 | -0.11 | -0.20 | -0.41 | -0.28 |
| 396 | ARHGDIA | 6 | NA | NA | NA | NA | 0.71 | -0.08 | 0.22 | -0.42 | -0.91 | -0.47 |
| 342667 | STAC2 | 6 | NA | NA | NA | NA | 0.00 | -0.20 | 0.05 | -0.16 | -0.42 | -0.12 |
| 90324 | CCDC97 | 6 | NA | NA | NA | NA | 0.34 | -0.16 | -0.02 | -0.20 | -0.41 | -0.13 |
| 10256 | CNKSR1 | 6 | NA | NA | NA | NA | 0.11 | -0.08 | 0.03 | -0.13 | -0.42 | -0.14 |
| 10262 | SF3B4 | 6 | NA | NA | NA | NA | 0.27 | -0.11 | 0.08 | -0.30 | -0.46 | -0.17 |
| 23126 | POGZ | 6 | NA | NA | NA | NA | 0.36 | -0.33 | -0.14 | -0.25 | -0.58 | -0.31 |
| 55252 | ASXL2 | 6 | NA | NA | NA | NA | 0.29 | -0.25 | 0.02 | -0.18 | -0.43 | -0.15 |
| 9922 | IQSEC1 | 6 | NA | NA | NA | NA | 0.38 | -0.20 | -0.04 | -0.07 | -0.40 | -0.23 |
| 92345 | NAF1 | 6 | NA | NA | NA | NA | 0.31 | -0.38 | -0.10 | -0.24 | -0.56 | -0.46 |
| 152485 | ZNF827 | 6 | NA | NA | NA | NA | 0.37 | -0.18 | 0.07 | -0.12 | -0.38 | -0.30 |
| 7073 | TIAL1 | 6 | NA | NA | NA | NA | 0.33 | -0.28 | -0.04 | -0.17 | -0.42 | -0.18 |
| 6695 | SPOCK1 | 6 | NA | NA | NA | NA | 0.21 | -0.10 | -0.10 | -0.34 | -0.57 | -0.40 |
| 25890 | ABI3BP | 6 | NA | NA | NA | NA | 0.39 | -0.32 | -0.21 | -0.26 | -0.72 | -0.72 |
| 9825 | SPATA2 | 6 | NA | NA | NA | NA | 0.33 | -0.23 | -0.03 | -0.26 | -0.45 | -0.17 |
| 200186 | CRTC2 | 6 | NA | NA | NA | NA | 0.35 | -0.18 | -0.05 | -0.33 | -0.44 | 0.02 |
| 23248 | RPRD2 | 6 | NA | NA | NA | NA | 0.30 | -0.17 | -0.09 | -0.24 | -0.50 | -0.05 |
| 6282 | S100A11 | 6 | NA | NA | NA | NA | 0.37 | -0.35 | -0.13 | -0.44 | -0.90 | -0.54 |
| 1200 | TPP1 | 6 | NA | NA | NA | NA | 0.10 | -0.12 | -0.19 | -0.27 | -0.40 | -0.14 |
| 56905 | C15orf39 | 6 | NA | NA | NA | NA | 0.45 | -0.26 | 0.04 | -0.19 | -0.50 | -0.25 |
| 6668 | SP2 | 6 | NA | NA | NA | NA | 0.35 | -0.14 | -0.03 | -0.32 | -0.47 | -0.25 |
| 93487 | MAPK1IP1L | 6 | NA | NA | NA | NA | 0.22 | -0.28 | -0.12 | -0.28 | -0.43 | -0.25 |
| 93380 | MMGT1 | 6 | NA | NA | NA | NA | 0.24 | -0.30 | -0.06 | -0.20 | -0.46 | -0.18 |
| 58485 | TRAPPC1 | 6 | NA | NA | NA | NA | 0.44 | -0.35 | 0.00 | -0.29 | -0.54 | -0.11 |
| 4862 | NPAS2 | 6 | NA | NA | NA | NA | 0.17 | -0.20 | 0.00 | -0.14 | -0.46 | -0.22 |
| 11016 | ATF7 | 6 | NA | NA | NA | NA | 0.16 | -0.05 | -0.04 | -0.24 | -0.39 | -0.22 |
| 254122 | SNX32 | 6 | NA | NA | NA | NA | 0.32 | -0.20 | -0.11 | -0.45 | -0.47 | -0.11 |
| 9986 | RCE1 | 6 | NA | NA | NA | NA | 0.04 | -0.19 | -0.14 | -0.14 | -0.41 | -0.14 |
| 8815 | BANF1 | 6 | NA | NA | NA | NA | 0.11 | -0.17 | 0.06 | -0.22 | -0.52 | -0.20 |
| 8061 | FOSL1 | 6 | NA | NA | NA | NA | 0.53 | -0.34 | -0.08 | -0.36 | -0.57 | -0.28 |
| 23399 | CTDNEP1 | 6 | NA | NA | NA | NA | 0.23 | -0.14 | -0.15 | -0.20 | -0.48 | -0.37 |
| 4947 | OAZ2 | 6 | NA | NA | NA | NA | 0.11 | -0.66 | -0.30 | -0.20 | -0.37 | 0.10 |
| 64764 | CREB3L2 | 6 | NA | NA | NA | NA | 0.24 | -0.18 | 0.00 | -0.10 | -0.44 | -0.16 |
| 6734 | SRPRA | 6 | NA | NA | NA | NA | 0.15 | -0.53 | -0.27 | -0.29 | -0.68 | -0.41 |
| 23194 | FBXL7 | 6 | NA | NA | NA | NA | 0.35 | -0.41 | -0.12 | -0.34 | -0.66 | -0.18 |
| 220929 | ZNF438 | 6 | NA | NA | NA | NA | 0.07 | -0.21 | -0.18 | -0.16 | -0.39 | -0.34 |
| 4512 | COX1 | 6 | NA | NA | NA | NA | 0.28 | 0.05 | -0.19 | -0.73 | -0.82 | -0.33 |
| 283489 | CHAMP1 | 6 | NA | NA | NA | NA | 0.41 | -0.45 | -0.17 | -0.33 | -0.56 | -0.19 |
| 4514 | COX3 | 6 | NA | NA | NA | NA | 0.60 | -0.05 | -0.11 | -0.63 | -0.89 | -0.27 |
| 26071 | FAM127B | 6 | NA | NA | NA | NA | 0.16 | -0.18 | -0.17 | -0.44 | -0.56 | -0.42 |
| 65979 | PHACTR4 | 6 | NA | NA | NA | NA | 0.42 | -0.24 | -0.01 | -0.31 | -0.53 | 0.01 |
| 221545 | C6orf136 | 6 | NA | NA | NA | NA | 0.19 | -0.18 | -0.07 | -0.20 | -0.47 | -0.11 |
| 6992 | PPP1R11 | 6 | NA | NA | NA | NA | 0.12 | -0.13 | -0.08 | -0.23 | -0.41 | -0.02 |
| NA | NA | 6 | NA | NA | NA | NA | 0.10 | -0.45 | -0.28 | -0.31 | -0.40 | -0.34 |
| NA | NA | 6 | NA | NA | NA | NA | 0.13 | -0.13 | -0.23 | -0.27 | -0.40 | -0.23 |
| 101926911 | LOC101926911 | 6 | NA | NA | NA | NA | -0.01 | -0.11 | -0.23 | -0.13 | -0.41 | 0.00 |
| 100463285 | MTRNR2L4 | 6 | NA | NA | NA | NA | 0.02 | -0.42 | -0.28 | -0.25 | -0.36 | -0.20 |
| 100506930 | LINC00665 | 6 | NA | NA | NA | NA | 0.20 | -0.18 | -0.13 | -0.20 | -0.49 | -0.30 |
| NA | NA | 6 | NA | NA | NA | NA | 0.82 | -0.40 | -0.27 | -0.56 | -0.57 | -0.20 |
| 11230 | PRAF2 | 6 | NA | NA | NA | NA | 0.12 | -0.13 | -0.14 | -0.31 | -0.41 | -0.08 |
| 24142 | NAT6 | 6 | NA | NA | NA | NA | 0.13 | -0.18 | -0.03 | -0.43 | -0.43 | -0.23 |
| NA | NA | 6 | NA | NA | NA | NA | 0.01 | -0.23 | -0.13 | -0.17 | -0.41 | -0.11 |
| NA | NA | 6 | NA | NA | NA | NA | 0.14 | -0.18 | -0.18 | -0.17 | -0.41 | -0.04 |
| 100463486 | MTRNR2L8 | 6 | NA | NA | NA | NA | 1.20 | -2.80 | -1.26 | -1.77 | -3.01 | -1.51 |
| 100463488 | MTRNR2L10 | 6 | NA | NA | NA | NA | 0.08 | -0.47 | -0.26 | -0.23 | -0.47 | -0.27 |
| 100462983 | MTRNR2L3 | 6 | NA | NA | NA | NA | 0.20 | -0.80 | -0.43 | -0.40 | -0.67 | -0.36 |
| 100462977 | MTRNR2L1 | 6 | NA | NA | NA | NA | 0.21 | -0.64 | -0.35 | -0.41 | -0.62 | -0.42 |
| NA | NA | 6 | NA | NA | NA | NA | 0.37 | -0.12 | -0.41 | -0.23 | -0.58 | -0.14 |
| NA | NA | 6 | NA | NA | NA | NA | 0.16 | -0.37 | -0.39 | -0.39 | -0.41 | -0.02 |
| NA | NA | 6 | NA | NA | NA | NA | 0.34 | -0.19 | -0.30 | -0.38 | -0.18 | -0.27 |
| NA | NA | 6 | NA | NA | NA | NA | 0.04 | -0.32 | 0.02 | -0.15 | -0.46 | -0.13 |
| 100462981 | MTRNR2L2 | 6 | NA | NA | NA | NA | 0.28 | -0.75 | -0.42 | -0.44 | -0.78 | -0.43 |
| NA | NA | 6 | NA | NA | NA | NA | 0.07 | -0.71 | -0.34 | -0.31 | -0.71 | -0.45 |
| NA | NA | 6 | NA | NA | NA | NA | 0.06 | -0.41 | -0.27 | -0.25 | -0.41 | -0.26 |
| NA | NA | 6 | NA | NA | NA | NA | 0.14 | -0.14 | -0.41 | -0.33 | -0.37 | -0.33 |
| 100129461 | LYRM4-AS1 | 6 | NA | NA | NA | NA | 0.04 | -0.31 | -0.24 | -0.24 | -0.49 | -0.39 |
| NA | NA | 6 | NA | NA | NA | NA | 0.19 | -0.51 | -0.38 | -0.17 | -0.50 | -0.12 |
| 378706 | RN7SL2 | 6 | NA | NA | NA | NA | 0.27 | -0.17 | -0.33 | -0.42 | -0.44 | 0.19 |
| NA | NA | 6 | NA | NA | NA | NA | 0.27 | -0.25 | -0.24 | -0.32 | -0.40 | -0.03 |
| NA | NA | 6 | NA | NA | NA | NA | 0.29 | -0.11 | -0.17 | -0.37 | -0.49 | -0.20 |
| NA | NA | 6 | NA | NA | NA | NA | 0.39 | -0.20 | -0.07 | -0.26 | -0.24 | -0.22 |
| 283267 | LINC00294 | 6 | NA | NA | NA | NA | 0.28 | -0.35 | -0.09 | -0.21 | -0.51 | -0.45 |
| NA | NA | 6 | NA | NA | NA | NA | 0.48 | -0.11 | -0.19 | -0.41 | -0.42 | -0.42 |
| NA | NA | 7 | Hill | 0 | 0 | -182.5 | -0.44 | -0.23 | -0.29 | -0.25 | -0.12 | -0.11 |
| NA | NA | 7 | Exp 4 | 0 | 0.6 | -86.1 | -0.11 | -0.18 | -0.25 | -0.20 | -0.40 | -0.17 |
| NA | NA | 7 | Poly 3 | 0.6 | 0.1 | -62.7 | -0.09 | -0.20 | -0.13 | -0.38 | -0.24 | -0.10 |
| NA | NA | 7 | Linear | 4.4 | 0.1 | -83 | -0.28 | -0.21 | -0.12 | -0.24 | -0.21 | -0.53 |
| NA | NA | 7 | Poly 3 | 0.3 | 0.2 | -182.2 | -0.24 | -0.19 | -0.31 | -0.52 | -0.11 | -0.18 |
| 5947 | RBP1 | 7 | NA | NA | NA | NA | -0.02 | -0.11 | -0.18 | -0.31 | -0.39 | -0.26 |
| 9070 | ASH2L | 7 | NA | NA | NA | NA | -0.08 | -0.51 | -0.22 | -0.20 | -0.40 | -0.18 |
| 339768 | ESPNL | 7 | NA | NA | NA | NA | -0.31 | -0.43 | -0.39 | -0.21 | -0.21 | -0.03 |
| NA | NA | 7 | NA | NA | NA | NA | -0.19 | -0.28 | -0.09 | -0.38 | -0.23 | -0.31 |
| NA | NA | 7 | NA | NA | NA | NA | -0.09 | -0.22 | -0.39 | -0.04 | -0.27 | -0.18 |
| 160335 | TMTC2 | 7 | NA | NA | NA | NA | -0.02 | -0.12 | -0.20 | -0.35 | -0.32 | -0.50 |
| 283254 | HARBI1 | 7 | NA | NA | NA | NA | -0.07 | -0.14 | -0.13 | -0.15 | -0.40 | -0.18 |
| 4541 | ND6 | 7 | NA | NA | NA | NA | -0.37 | -0.21 | -0.50 | -0.59 | 0.10 | -0.41 |
| 4513 | COX2 | 7 | NA | NA | NA | NA | -0.01 | 0.04 | -0.15 | -0.91 | -0.74 | -0.32 |
| 4519 | CYTB | 7 | NA | NA | NA | NA | -0.02 | -0.42 | -0.48 | -1.03 | -1.01 | -0.77 |
| 4536 | ND2 | 7 | NA | NA | NA | NA | -0.40 | -0.41 | -0.36 | -1.02 | -0.45 | -0.82 |
| 4540 | ND5 | 7 | NA | NA | NA | NA | -0.09 | -0.03 | -0.18 | -0.92 | -0.40 | -0.56 |
| 4537 | ND3 | 7 | NA | NA | NA | NA | -0.23 | 0.01 | -0.03 | -1.07 | -0.88 | -0.25 |
| 4538 | ND4 | 7 | NA | NA | NA | NA | -0.14 | -0.08 | -0.23 | -1.14 | -0.52 | -0.68 |
| 4535 | ND1 | 7 | NA | NA | NA | NA | 0.06 | -0.56 | -0.49 | -1.18 | -0.99 | -0.87 |
| 4508 | ATP6 | 7 | NA | NA | NA | NA | -0.56 | -0.52 | -0.61 | -1.23 | -0.89 | -0.97 |
| NA | NA | 7 | NA | NA | NA | NA | -0.20 | -0.20 | -0.35 | -0.51 | -0.19 | -0.23 |
| 4539 | ND4L | 7 | NA | NA | NA | NA | -0.21 | -0.16 | -0.37 | -1.09 | -0.70 | -0.58 |
| 9311 | ASIC3 | 7 | NA | NA | NA | NA | -0.01 | -0.20 | -0.08 | -0.41 | -0.40 | -0.14 |
| 55559 | HAUS7 | 7 | NA | NA | NA | NA | -0.16 | -0.15 | -0.06 | -0.46 | -0.15 | -0.26 |
| 56413 | LTB4R2 | 7 | NA | NA | NA | NA | 0.04 | -0.15 | -0.15 | -0.40 | -0.21 | -0.07 |
| 55449 | DHRS4-AS1 | 7 | NA | NA | NA | NA | -0.03 | -0.10 | -0.24 | -0.21 | -0.41 | -0.23 |
| NA | NA | 7 | NA | NA | NA | NA | -0.15 | -0.38 | -0.12 | -0.27 | 0.13 | 0.06 |
| 29092 | LINC00339 | 7 | NA | NA | NA | NA | -0.24 | -0.19 | -0.15 | -0.16 | -0.40 | -0.20 |
| 100302175 | MIR1207 | 7 | NA | NA | NA | NA | -0.18 | -0.34 | -0.10 | -0.39 | -0.28 | -0.33 |
| 103724387 | LINC01058 | 7 | NA | NA | NA | NA | -0.38 | -0.28 | -0.14 | -0.21 | -0.07 | -0.09 |
| NA | NA | 7 | NA | NA | NA | NA | -0.33 | 0.00 | -0.11 | -0.50 | -0.02 | -0.40 |
| 440823 | MIAT | 7 | NA | NA | NA | NA | -0.30 | -0.07 | -0.15 | -0.39 | -0.22 | -0.28 |
| 102724450 | LOC102724450 | 7 | NA | NA | NA | NA | -0.38 | -0.32 | -0.21 | -0.16 | -0.17 | -0.05 |
| 100507308 | TARID | 7 | NA | NA | NA | NA | -0.24 | -0.38 | -0.44 | -0.36 | -0.23 | -0.27 |
| 4509 | ATP8 | 7 | NA | NA | NA | NA | -0.46 | -0.45 | -0.69 | -1.11 | -0.70 | -0.72 |
| NA | NA | 7 | NA | NA | NA | NA | -0.16 | -0.22 | 0.00 | -0.13 | -0.39 | -0.03 |
| NA | NA | 7 | NA | NA | NA | NA | -0.08 | -0.18 | -0.13 | -0.39 | -0.23 | -0.04 |
| NA | NA | 7 | NA | NA | NA | NA | -0.27 | -0.06 | -0.27 | -0.27 | -0.38 | -0.24 |
| 692093 | SNORD62B | 7 | NA | NA | NA | NA | -0.32 | -0.08 | -0.03 | -0.25 | -0.38 | -0.21 |
| 404266 | HOXB-AS3 | 7 | NA | NA | NA | NA | -0.11 | -0.10 | -0.19 | -0.39 | -0.19 | -0.22 |
| NA | NA | 7 | NA | NA | NA | NA | -0.04 | -0.13 | -0.16 | -0.19 | -0.38 | -0.04 |
| 100874222 | RNF219-AS1 | 7 | NA | NA | NA | NA | 0.05 | -0.10 | -0.29 | -0.39 | -0.32 | -0.11 |
| NA | NA | 7 | NA | NA | NA | NA | -0.14 | -0.29 | -0.12 | -0.17 | -0.34 | -0.39 |
| NA | NA | 7 | NA | NA | NA | NA | -0.43 | -0.13 | -0.14 | -0.12 | -0.18 | -0.18 |
| 80864 | EGFL8 | 7 | NA | NA | NA | NA | -0.13 | -0.08 | -0.15 | -0.08 | -0.40 | -0.08 |
| NA | NA | 7 | NA | NA | NA | NA | -0.35 | -0.33 | -0.37 | -0.10 | -0.39 | 0.00 |
| NA | NA | 7 | NA | NA | NA | NA | -0.51 | -0.52 | -0.55 | -1.09 | -0.66 | -0.79 |
| NA | NA | 7 | NA | NA | NA | NA | -0.29 | -0.31 | -0.14 | -0.17 | -0.21 | -0.47 |
| NA | NA | 7 | NA | NA | NA | NA | -0.12 | -0.22 | -0.40 | -0.03 | -0.40 | -0.21 |
| NA | NA | 7 | NA | NA | NA | NA | -0.23 | -0.22 | -0.38 | -0.11 | -0.25 | -0.06 |
| NA | NA | 7 | NA | NA | NA | NA | -0.27 | -0.14 | -0.13 | -0.42 | -0.02 | -0.19 |
| NA | NA | 7 | NA | NA | NA | NA | -0.16 | -0.25 | -0.23 | -0.38 | -0.23 | -0.13 |
| NA | NA | 7 | NA | NA | NA | NA | -0.04 | -0.16 | -0.24 | -0.38 | -0.44 | -0.22 |
| NA | NA | 7 | NA | NA | NA | NA | -0.18 | -0.14 | -0.16 | -0.39 | -0.30 | -0.19 |
| NA | NA | 7 | NA | NA | NA | NA | -0.08 | -0.17 | -0.28 | -0.05 | -0.40 | -0.17 |
| NA | NA | 7 | NA | NA | NA | NA | -0.15 | -0.09 | -0.09 | -0.38 | 0.16 | -0.12 |
| NA | NA | 7 | NA | NA | NA | NA | -0.11 | -0.20 | -0.11 | -0.38 | -0.18 | -0.08 |
| NA | NA | 7 | NA | NA | NA | NA | -0.31 | -0.30 | -0.08 | -0.36 | -0.40 | -0.16 |
| NA | NA | 7 | NA | NA | NA | NA | 0.01 | -0.18 | -0.43 | -0.27 | -0.20 | -0.06 |
| NA | NA | 7 | NA | NA | NA | NA | -0.24 | -0.44 | -0.23 | -0.23 | -0.07 | -0.08 |
| NA | NA | 7 | NA | NA | NA | NA | -0.48 | -0.03 | -0.20 | -0.16 | -0.21 | -0.29 |
| NA | NA | 7 | NA | NA | NA | NA | -0.14 | -0.25 | -0.10 | -0.38 | -0.04 | 0.02 |
| NA | NA | 7 | NA | NA | NA | NA | -0.44 | 0.38 | 0.11 | -1.73 | -0.70 | -0.27 |
| NA | NA | 7 | NA | NA | NA | NA | -0.25 | -0.24 | -0.23 | -0.21 | -0.38 | -0.12 |
| NA | NA | 7 | NA | NA | NA | NA | -0.25 | -0.13 | -0.24 | -0.43 | -0.25 | -0.20 |
| NA | NA | 7 | NA | NA | NA | NA | -0.18 | -0.09 | -0.39 | -0.09 | -0.34 | 0.14 |
| NA | NA | 7 | NA | NA | NA | NA | -0.13 | -0.07 | -0.25 | -0.26 | -0.38 | -0.23 |
| 116828 | N4BP2L2-IT2 | 7 | NA | NA | NA | NA | -0.27 | -0.23 | -0.11 | -0.41 | -0.35 | -0.15 |
| 7092 | TLL1 | 8 | Linear | 3 | 0.9 | 20.1 | 0.03 | -0.02 | -0.01 | 0.05 | -0.13 | -0.65 |
| 6098 | ROS1 | 8 | Linear | 3.4 | 0.8 | -12.7 | 0.06 | -0.09 | -0.06 | -0.04 | -0.16 | -0.59 |
| 11174 | ADAMTS6 | 8 | Linear | 3 | 0.8 | 152.8 | -0.04 | 0.01 | -0.01 | 0.01 | -0.12 | -0.58 |
| 9603 | NFE2L3 | 8 | Power | 3.8 | 0.6 | 149.8 | -0.06 | -0.03 | -0.05 | 0.09 | -0.08 | -0.70 |
| 586 | BCAT1 | 8 | Linear | 2.6 | 0.9 | 366.1 | -0.06 | -0.01 | 0.04 | -0.07 | -0.16 | -0.61 |
| 55711 | FAR2 | 8 | Poly 3 | 2.5 | 0.1 | -0.3 | -0.04 | -0.14 | 0.03 | 0.09 | -0.10 | -0.48 |
| 7037 | TFRC | 8 | Linear | 3.2 | 0.4 | 362.3 | -0.11 | -0.05 | -0.06 | 0.00 | -0.24 | -0.63 |
| 54475 | NLE1 | 8 | Exp 2 | 2.9 | 0.7 | 163.7 | -0.05 | -0.04 | -0.04 | 0.04 | -0.27 | -0.58 |
| 3776 | KCNK2 | 8 | Linear | 1.8 | 0.9 | -38.7 | 0.01 | 0.01 | -0.01 | 0.05 | -0.25 | -0.70 |
| 50507 | NOX4 | 8 | Exp 2 | 3.2 | 1 | 47.1 | -0.03 | -0.03 | -0.03 | 0.00 | -0.26 | -0.54 |
| 9942 | XYLB | 8 | Exp 2 | 3.9 | 0.9 | -13.4 | 0.00 | -0.05 | 0.00 | -0.01 | -0.18 | -0.38 |
| 164633 | CABP7 | 8 | Linear | 3.8 | 0.2 | -77 | -0.04 | -0.15 | 0.00 | 0.03 | -0.21 | -0.45 |
| 8814 | CDKL1 | 8 | Exp 2 | 2.1 | 0.9 | 8.7 | -0.01 | -0.06 | 0.00 | 0.01 | -0.20 | -0.47 |
| 5836 | PYGL | 8 | Linear | 1.2 | 0.4 | 231.4 | 0.02 | 0.01 | 0.00 | 0.05 | -0.18 | -0.59 |
| 56062 | KLHL4 | 8 | Power | 4.8 | 0.5 | -50.4 | -0.05 | -0.05 | -0.14 | 0.00 | -0.03 | -0.50 |
| 857 | CAV1 | 8 | Exp 3 | 2.9 | 0.5 | 328.4 | -0.08 | -0.01 | 0.00 | -0.02 | -0.14 | -0.77 |
| 1075 | CTSC | 8 | Linear | 2.2 | 0.2 | 185.9 | -0.12 | -0.02 | -0.07 | 0.01 | -0.24 | -0.65 |
| 81029 | WNT5B | 8 | Linear | 2.1 | 0.6 | 93.1 | -0.08 | 0.02 | 0.02 | 0.10 | -0.17 | -0.70 |
| 4121 | MAN1A1 | 8 | Linear | 3.5 | 0.6 | 57.1 | -0.13 | -0.03 | -0.09 | -0.10 | -0.23 | -0.55 |
| 3676 | ITGA4 | 8 | Linear | 1.9 | 0.7 | 153.8 | -0.08 | -0.02 | -0.08 | -0.02 | -0.24 | -0.60 |
| 2202 | EFEMP1 | 8 | Poly 2 | 3 | 0.6 | 219.1 | -0.01 | -0.01 | -0.02 | 0.08 | -0.08 | -0.69 |
| 2043 | EPHA4 | 8 | Power | 3.8 | 1 | 33.7 | -0.04 | 0.05 | 0.02 | -0.02 | -0.06 | -0.60 |
| 10625 | IVNS1ABP | 8 | Linear | 2.3 | 0.5 | 222 | -0.07 | -0.04 | -0.05 | -0.03 | -0.16 | -0.60 |
| 10981 | RAB32 | 8 | Exp 2 | 3.8 | 0.3 | 239.5 | -0.09 | -0.01 | -0.09 | 0.13 | -0.27 | -0.59 |
| 4602 | MYB | 8 | Exp 2 | 2.9 | 0.4 | -60.3 | -0.08 | 0.07 | 0.02 | -0.09 | -0.23 | -0.43 |
| 9194 | SLC16A7 | 8 | Poly 2 | 4.9 | 0.1 | 171.2 | -0.15 | -0.12 | -0.11 | -0.17 | -0.09 | -0.61 |
| 55068 | ENOX1 | 8 | Linear | 3.5 | 0.2 | -32.7 | -0.11 | -0.13 | -0.19 | -0.04 | -0.25 | -0.62 |
| 725 | C4BPB | 8 | Linear | 3.4 | 0.5 | -9.3 | 0.04 | -0.02 | -0.06 | 0.13 | -0.20 | -0.50 |
| 56937 | PMEPA1 | 8 | Exp 3 | 4.5 | 0.1 | 120.6 | -0.25 | -0.08 | 0.01 | 0.01 | -0.11 | -0.63 |
| 10799 | RPP40 | 8 | Linear | 3 | 0.6 | 134.5 | -0.10 | -0.01 | -0.08 | 0.04 | -0.17 | -0.57 |
| 10257 | ABCC4 | 8 | Exp 3 | 3 | 0.4 | 162.8 | -0.08 | -0.03 | -0.01 | 0.03 | -0.12 | -0.58 |
| 5732 | PTGER2 | 8 | Poly 3 | 0.5 | 0.6 | -19.4 | -0.08 | -0.01 | 0.02 | 0.11 | -0.04 | -0.69 |
| 57381 | RHOJ | 8 | Linear | 3.8 | 0.2 | -53 | 0.06 | -0.01 | -0.17 | 0.01 | -0.08 | -0.43 |
| 117248 | GALNT15 | 8 | Poly 2 | 4.7 | 0.3 | -101.6 | -0.09 | -0.12 | -0.02 | -0.05 | 0.03 | -0.39 |
| 11095 | ADAMTS8 | 8 | Power | 4.3 | 0.9 | -124.9 | -0.01 | -0.01 | -0.09 | -0.02 | -0.04 | -0.49 |
| 29923 | HILPDA | 8 | Exp 3 | 3.7 | 0.7 | 69.3 | -0.11 | -0.05 | -0.05 | -0.03 | -0.14 | -0.52 |
| 3351 | HTR1B | 8 | Linear | 3 | 0.4 | -92.2 | -0.01 | 0.07 | 0.10 | -0.12 | -0.14 | -0.38 |
| 4907 | NT5E | 8 | Poly 2 | 4.1 | 0.2 | 194 | -0.10 | 0.02 | -0.02 | 0.08 | -0.06 | -0.65 |
| 79899 | PRR5L | 8 | Linear | 2.2 | 0.7 | 139.8 | -0.04 | -0.07 | -0.03 | 0.02 | -0.16 | -0.70 |
| 5270 | SERPINE2 | 8 | Linear | 1.5 | 0.7 | 79.4 | 0.00 | 0.07 | 0.06 | -0.04 | -0.20 | -0.59 |
| 28969 | BZW2 | 8 | Linear | 2.6 | 0.1 | 224.6 | -0.10 | -0.01 | -0.03 | 0.08 | -0.23 | -0.61 |
| 4856 | NOV | 8 | Linear | 3.5 | 0.5 | -33.7 | -0.15 | -0.08 | -0.09 | -0.13 | -0.14 | -0.57 |
| 54852 | PAQR5 | 8 | Poly 2 | 4.2 | 0.2 | 41.3 | -0.17 | -0.18 | -0.05 | -0.05 | -0.07 | -0.54 |
| 55089 | SLC38A4 | 8 | Linear | 3 | 0.7 | -47.1 | -0.07 | -0.03 | -0.01 | -0.14 | -0.11 | -0.45 |
| 347902 | AMIGO2 | 8 | Linear | 3 | 0.8 | 292.4 | -0.06 | -0.03 | 0.00 | -0.01 | -0.15 | -0.79 |
| 11010 | GLIPR1 | 8 | Power | 4.8 | 0.5 | 258.1 | -0.11 | -0.04 | -0.08 | -0.03 | -0.07 | -0.65 |
| 4060 | LUM | 8 | Power | 4.9 | 0.6 | 237.1 | -0.12 | -0.04 | -0.06 | 0.07 | 0.01 | -0.63 |
| 83851 | SYT16 | 8 | Linear | 4.3 | 1 | 6.2 | 0.01 | 0.01 | 0.02 | -0.04 | -0.11 | -0.46 |
| 7168 | TPM1 | 8 | Poly 2 | 3.3 | 0.7 | 425.8 | -0.07 | 0.04 | -0.02 | 0.04 | -0.09 | -0.69 |
| 54438 | GFOD1 | 8 | Power | 3.6 | 1 | 112.3 | -0.02 | 0.04 | 0.02 | -0.02 | -0.06 | -0.57 |
| 137902 | PXDNL | 8 | Poly 2 | 4.6 | 0.1 | -47.7 | 0.01 | -0.19 | -0.02 | 0.14 | 0.02 | -0.43 |
| 3363 | HTR7 | 8 | Power | 4.9 | 0.1 | -84.2 | -0.20 | -0.14 | -0.11 | -0.05 | -0.15 | -0.55 |
| 130576 | LYPD6B | 8 | Linear | 4.1 | 0.3 | 8.5 | -0.10 | -0.13 | -0.15 | 0.02 | -0.13 | -0.48 |
| 11098 | PRSS23 | 8 | Poly 2 | 3.6 | 0.5 | 261.3 | -0.08 | 0.00 | -0.05 | 0.05 | -0.07 | -0.61 |
| 79750 | ZNF385D | 8 | Linear | 1.7 | 0.7 | -95.9 | 0.05 | 0.05 | 0.01 | 0.07 | -0.15 | -0.51 |
| 2977 | GUCY1A2 | 8 | Power | 4.6 | 0.6 | -74.6 | -0.04 | -0.02 | -0.03 | -0.09 | -0.06 | -0.40 |
| 55351 | STK32B | 8 | Linear | 3.5 | 0.6 | -62.7 | 0.06 | -0.04 | -0.11 | -0.02 | -0.18 | -0.44 |
| 114548 | NLRP3 | 8 | Linear | 3.8 | 0.2 | -34 | -0.07 | -0.03 | -0.09 | 0.11 | -0.14 | -0.41 |
| 26577 | PCOLCE2 | 8 | Linear | 4.1 | 0.2 | 9.9 | -0.17 | -0.25 | -0.16 | -0.09 | -0.18 | -0.58 |
| 9464 | HAND2 | 8 | Linear | 3.6 | 0.3 | -52.5 | -0.05 | -0.13 | -0.02 | -0.07 | -0.16 | -0.47 |
| 140458 | ASB5 | 8 | Linear | 3.4 | 0.4 | -92.3 | -0.02 | -0.13 | -0.04 | 0.02 | -0.21 | -0.40 |
| 6690 | SPINK1 | 8 | Linear | 4.9 | 0.6 | -157.5 | 0.01 | -0.10 | -0.09 | -0.05 | -0.02 | -0.43 |
| 133396 | IL31RA | 8 | Linear | 2.6 | 0.8 | -99.3 | -0.06 | -0.01 | 0.00 | -0.03 | -0.10 | -0.42 |
| 55536 | CDCA7L | 8 | Power | 4.9 | 0.1 | 216.3 | -0.16 | -0.10 | -0.11 | 0.02 | -0.10 | -0.61 |
| 158158 | RASEF | 8 | Linear | 3.4 | 0.9 | 55.6 | -0.09 | 0.01 | -0.03 | 0.00 | -0.14 | -0.60 |
| 120114 | FAT3 | 8 | Exp 3 | 4 | 0.7 | 14.4 | -0.14 | -0.05 | 0.00 | -0.01 | -0.10 | -0.54 |
| 220963 | SLC16A9 | 8 | Power | 5 | 0.5 | -86.3 | -0.20 | -0.15 | -0.09 | -0.14 | -0.11 | -0.40 |
| 56935 | SMCO4 | 8 | Linear | 2.3 | 0.6 | 11.1 | -0.01 | -0.11 | -0.07 | 0.00 | -0.22 | -0.49 |
| NA | NA | 8 | Linear | 3.8 | 0.3 | 17.1 | -0.06 | -0.21 | -0.12 | -0.05 | -0.11 | -0.50 |
| 5028 | P2RY1 | 8 | Exp 2 | 4.1 | 0.8 | -5.2 | -0.15 | -0.03 | 0.00 | -0.06 | -0.21 | -0.41 |
| 214 | ALCAM | 8 | Linear | 2.3 | 0.6 | 303.6 | -0.07 | 0.04 | -0.04 | -0.05 | -0.18 | -0.72 |
| 3892 | KRT86 | 8 | Linear | 4.1 | 0.4 | -47.3 | -0.19 | -0.07 | -0.06 | -0.07 | -0.13 | -0.50 |
| 84864 | MINA | 8 | Linear | 2.1 | 0.3 | 131.1 | -0.11 | -0.02 | -0.08 | -0.02 | -0.20 | -0.63 |
| 84230 | LRRC8C | 8 | Linear | 4 | 0.5 | 49.2 | -0.02 | -0.20 | 0.02 | -0.08 | -0.17 | -0.50 |
| 6641 | SNTB1 | 8 | Linear | 4.9 | 0.9 | 23.6 | -0.06 | -0.11 | -0.06 | -0.07 | -0.16 | -0.45 |
| 26472 | PPP1R14B | 8 | Linear | 2.4 | 0.4 | 226.2 | -0.07 | 0.09 | -0.05 | 0.03 | -0.21 | -0.59 |
| 84733 | CBX2 | 8 | Linear | 2.9 | 1 | 36.1 | -0.08 | -0.03 | -0.06 | -0.08 | -0.24 | -0.56 |
| 9156 | EXO1 | 8 | Linear | 1.9 | 0 | 184.3 | -0.11 | -0.08 | -0.12 | -0.01 | -0.23 | -0.62 |
| 7025 | NR2F1 | 8 | Linear | 1.5 | 0.5 | 58.7 | 0.00 | 0.08 | -0.02 | -0.05 | -0.15 | -0.72 |
| 153364 | MBLAC2 | 8 | Exp 3 | 4.4 | 0.6 | 52.3 | -0.12 | 0.00 | -0.04 | -0.08 | -0.08 | -0.54 |
| 27132 | CPNE7 | 8 | Linear | 2.9 | 0.8 | -52.4 | 0.00 | -0.08 | -0.09 | -0.09 | -0.19 | -0.54 |
| 284034 | LINC00670 | 8 | Power | 4.8 | 0.8 | -23.9 | 0.04 | -0.06 | -0.07 | 0.02 | -0.02 | -0.61 |
| 168620 | BHLHA15 | 8 | Linear | 3.2 | 0.6 | -18.4 | -0.08 | -0.14 | -0.12 | -0.15 | -0.19 | -0.57 |
| 23109 | DDN | 8 | Linear | 3.3 | 0.5 | -7.6 | -0.14 | -0.20 | -0.09 | -0.12 | -0.16 | -0.56 |
| 338322 | NLRP10 | 8 | Linear | 3 | 0.8 | 29.4 | -0.07 | -0.02 | 0.07 | -0.03 | -0.17 | -0.52 |
| 6546 | SLC8A1 | 8 | Linear | 2.8 | 0.4 | 124.5 | -0.11 | 0.02 | 0.01 | 0.06 | -0.17 | -0.60 |
| 341277 | OVCH2 | 8 | Linear | 4.1 | 0.8 | -117 | 0.00 | -0.05 | -0.03 | -0.16 | -0.16 | -0.40 |
| 359845 | FAM101B | 8 | Poly 2 | 3 | 0.3 | 154.1 | -0.02 | -0.04 | -0.04 | 0.06 | -0.09 | -0.63 |
| 84856 | LINC00839 | 8 | Linear | 3.3 | 0.2 | 139 | -0.06 | -0.04 | -0.10 | 0.09 | -0.18 | -0.55 |
| 57801 | HES4 | 8 | Exp 2 | 3.1 | 0.2 | 137.1 | -0.03 | 0.20 | -0.11 | -0.04 | -0.23 | -0.62 |
| 134637 | ADAT2 | 8 | Exp 2 | 1.9 | 0.9 | 4.6 | 0.04 | 0.04 | 0.00 | 0.02 | -0.24 | -0.55 |
| 374393 | FAM111B | 8 | Power | 4.8 | 0.4 | 183 | -0.08 | -0.02 | -0.04 | 0.04 | 0.02 | -0.57 |
| NA | NA | 8 | Exp 3 | 4 | 0.5 | 87.1 | -0.09 | -0.03 | -0.04 | -0.02 | -0.09 | -0.54 |
| 1604 | CD55 | 8 | Linear | 2.8 | 0.2 | 133.7 | -0.14 | -0.03 | -0.06 | 0.03 | -0.15 | -0.57 |
| 285971 | ZNF775 | 8 | Linear | 3.4 | 0.2 | 0.1 | -0.12 | -0.26 | -0.17 | -0.11 | -0.22 | -0.57 |
| 57181 | SLC39A10 | 8 | Exp 3 | 3 | 0.9 | 205.2 | -0.01 | -0.07 | -0.03 | -0.04 | -0.14 | -0.58 |
| 1305 | COL13A1 | 8 | Linear | 3.5 | 0.7 | -6 | -0.04 | 0.03 | 0.15 | 0.02 | -0.21 | -0.49 |
| 80380 | PDCD1LG2 | 8 | Linear | 2.5 | 0.9 | 33.1 | 0.00 | 0.00 | 0.02 | 0.02 | -0.13 | -0.55 |
| 7541 | ZBTB14 | 8 | Exp 2 | 1.9 | 0.6 | 95.4 | -0.07 | -0.06 | -0.12 | -0.08 | -0.26 | -0.56 |
| 1902 | LPAR1 | 8 | Linear | 3.1 | 0.6 | -1.9 | -0.12 | -0.01 | -0.09 | -0.12 | -0.14 | -0.56 |
| 220992 | ZNF485 | 8 | Linear | 2.9 | 0.3 | -24 | 0.01 | 0.00 | -0.16 | -0.01 | -0.16 | -0.52 |
| 4326 | MMP17 | 8 | Linear | 2.8 | 1 | -39 | -0.06 | 0.00 | 0.00 | -0.01 | -0.15 | -0.39 |
| 1756 | DMD | 8 | Power | 3.3 | 0.7 | 92 | -0.09 | -0.05 | -0.04 | -0.10 | -0.12 | -0.59 |
| 196051 | PLPP4 | 8 | Linear | 1.9 | 0 | 38.8 | -0.01 | -0.10 | -0.01 | 0.10 | -0.19 | -0.53 |
| 5673 | PSG5 | 8 | Linear | 3.7 | 1 | 93.5 | 0.00 | 0.00 | -0.07 | -0.02 | -0.16 | -0.60 |
| 5212 | VIT | 8 | Exp 2 | 4.4 | 0.3 | -81.5 | -0.22 | -0.12 | -0.04 | -0.15 | -0.20 | -0.44 |
| 3887 | KRT81 | 8 | Exp 2 | 2.1 | 0.5 | -92.1 | -0.10 | 0.01 | 0.03 | 0.01 | -0.24 | -0.49 |
| NA | NA | 8 | Exp 2 | 2.6 | 1 | -47.5 | 0.01 | -0.03 | -0.06 | -0.11 | -0.21 | -0.46 |
| NA | NA | 8 | Linear | 3.7 | 0.8 | -1.6 | -0.14 | -0.04 | -0.11 | -0.06 | -0.17 | -0.52 |
| NA | NA | 8 | Linear | 2.5 | 0.5 | -62.3 | 0.07 | -0.01 | 0.02 | 0.11 | -0.18 | -0.51 |
| 728558 | ENTPD1-AS1 | 8 | Linear | 2.9 | 0.8 | 28.8 | -0.08 | -0.02 | -0.11 | -0.11 | -0.18 | -0.52 |
| 400619 | LINC00511 | 8 | Poly 2 | 3.7 | 0.3 | 38.9 | -0.02 | -0.13 | -0.06 | 0.05 | -0.09 | -0.62 |
| NA | NA | 8 | Linear | 2.2 | 1 | 52.9 | -0.02 | 0.02 | -0.03 | -0.08 | -0.21 | -0.56 |
| NA | NA | 8 | Poly 2 | 4 | 0.7 | 56.7 | -0.02 | 0.02 | -0.03 | 0.11 | -0.04 | -0.58 |
| 100287314 | LINC00941 | 8 | Exp 2 | 2.3 | 0.9 | 15.7 | 0.05 | 0.03 | 0.06 | 0.02 | -0.20 | -0.46 |
| 441094 | NR2F1-AS1 | 8 | Exp 2 | 1.4 | 0 | -25.4 | -0.08 | 0.07 | 0.10 | 0.01 | -0.21 | -0.51 |
| 654322 | SNORA13 | 8 | Power | 4.9 | 0.7 | -93.4 | -0.07 | -0.03 | -0.08 | -0.13 | -0.05 | -0.40 |
| NA | NA | 8 | Linear | 4.4 | 0.1 | -42.4 | -0.21 | -0.21 | -0.03 | -0.20 | -0.17 | -0.47 |
| 348926 | FAM86EP | 8 | Linear | 2.9 | 0.8 | -21.2 | 0.02 | -0.02 | -0.02 | 0.05 | -0.08 | -0.41 |
| NA | NA | 8 | Linear | 4.6 | 0.3 | -78.9 | -0.02 | -0.13 | -0.19 | -0.15 | -0.19 | -0.42 |
| NA | NA | 8 | Power | 4.9 | 0.7 | -49 | -0.06 | -0.07 | 0.03 | -0.04 | -0.19 | -0.54 |
| NA | NA | 8 | Exp 2 | 3.5 | 0.1 | -12.7 | -0.15 | -0.12 | -0.01 | 0.06 | -0.26 | -0.46 |
| 79104 | MEG8 | 8 | Exp 2 | 2.9 | 0.9 | -38.4 | 0.04 | 0.06 | 0.00 | -0.08 | -0.15 | -0.38 |
| 101929690 | LINC01583 | 8 | Exp 2 | 3.1 | 0.8 | -1.9 | -0.03 | 0.12 | 0.00 | -0.07 | -0.21 | -0.57 |
| NA | NA | 8 | Power | 5 | 0.1 | -26.9 | -0.11 | -0.19 | -0.24 | -0.13 | -0.12 | -0.48 |
| 100507421 | TMEM178B | 8 | Power | 5 | 0.9 | 59.3 | -0.05 | -0.05 | -0.04 | 0.09 | 0.05 | -0.48 |
| 79922 | MRM1 | 8 | Exp 2 | 2.5 | 0.8 | 51 | -0.02 | 0.11 | -0.03 | 0.00 | -0.19 | -0.51 |
| NA | NA | 8 | Power | 5 | 0.2 | -42 | -0.23 | -0.16 | -0.16 | -0.10 | -0.08 | -0.43 |
| 1595 | CYP51A1 | 8 | NA | NA | NA | NA | 0.13 | -0.10 | -0.07 | -0.04 | -0.18 | -0.41 |
| 1767 | DNAH5 | 8 | NA | NA | NA | NA | -0.13 | 0.02 | -0.11 | 0.04 | -0.03 | -0.38 |
| 26064 | RAI14 | 8 | NA | NA | NA | NA | 0.04 | -0.02 | 0.04 | 0.06 | -0.05 | -0.47 |
| 57545 | CC2D2A | 8 | NA | NA | NA | NA | -0.08 | -0.05 | -0.12 | -0.05 | -0.28 | -0.41 |
| 51474 | LIMA1 | 8 | NA | NA | NA | NA | -0.05 | -0.16 | -0.08 | 0.02 | -0.02 | -0.48 |
| 51154 | MRTO4 | 8 | NA | NA | NA | NA | -0.07 | -0.02 | -0.05 | 0.08 | -0.17 | -0.56 |
| 114800 | CCDC85A | 8 | NA | NA | NA | NA | 0.03 | 0.01 | -0.01 | -0.08 | 0.02 | -0.39 |
| 5378 | PMS1 | 8 | NA | NA | NA | NA | -0.09 | -0.02 | -0.07 | -0.01 | -0.05 | -0.39 |
| 3843 | IPO5 | 8 | NA | NA | NA | NA | -0.02 | 0.02 | -0.02 | 0.04 | -0.15 | -0.41 |
| 10885 | WDR3 | 8 | NA | NA | NA | NA | -0.08 | 0.01 | -0.05 | 0.06 | -0.06 | -0.43 |
| 24140 | FTSJ1 | 8 | NA | NA | NA | NA | 0.02 | 0.00 | 0.00 | 0.08 | -0.16 | -0.41 |
| 10060 | ABCC9 | 8 | NA | NA | NA | NA | 0.01 | -0.03 | -0.12 | 0.02 | -0.11 | -0.40 |
| 10272 | FSTL3 | 8 | NA | NA | NA | NA | 0.05 | -0.03 | 0.01 | 0.02 | -0.18 | -0.51 |
| 9948 | WDR1 | 8 | NA | NA | NA | NA | -0.05 | -0.07 | -0.02 | 0.04 | -0.07 | -0.39 |
| 2023 | ENO1 | 8 | NA | NA | NA | NA | 0.02 | 0.02 | -0.03 | 0.07 | -0.26 | -0.46 |
| 51175 | TUBE1 | 8 | NA | NA | NA | NA | -0.14 | -0.10 | -0.20 | -0.12 | -0.28 | -0.42 |
| 10371 | SEMA3A | 8 | NA | NA | NA | NA | 0.05 | 0.02 | -0.04 | -0.05 | -0.07 | -0.43 |
| 10512 | SEMA3C | 8 | NA | NA | NA | NA | -0.14 | -0.02 | -0.09 | -0.05 | -0.07 | -0.54 |
| 7374 | UNG | 8 | NA | NA | NA | NA | -0.06 | -0.08 | 0.03 | 0.14 | 0.05 | -0.48 |
| 2191 | FAP | 8 | NA | NA | NA | NA | -0.11 | -0.10 | -0.12 | 0.00 | -0.23 | -0.53 |
| 8671 | SLC4A4 | 8 | NA | NA | NA | NA | -0.04 | -0.03 | 0.04 | 0.03 | -0.10 | -0.41 |
| 50509 | COL5A3 | 8 | NA | NA | NA | NA | -0.03 | -0.14 | -0.07 | -0.01 | -0.11 | -0.44 |
| 9933 | PUM3 | 8 | NA | NA | NA | NA | -0.17 | -0.03 | -0.13 | 0.03 | -0.04 | -0.54 |
| 7188 | TRAF5 | 8 | NA | NA | NA | NA | 0.01 | 0.03 | -0.01 | -0.03 | -0.10 | -0.54 |
| 25929 | GEMIN5 | 8 | NA | NA | NA | NA | 0.01 | 0.05 | 0.07 | 0.04 | -0.18 | -0.49 |
| 81929 | SEH1L | 8 | NA | NA | NA | NA | -0.09 | -0.03 | -0.03 | -0.07 | -0.15 | -0.40 |
| 27292 | DIMT1 | 8 | NA | NA | NA | NA | -0.11 | -0.03 | -0.07 | 0.00 | -0.13 | -0.46 |
| 54517 | PUS7 | 8 | NA | NA | NA | NA | -0.07 | -0.02 | -0.05 | 0.08 | -0.06 | -0.47 |
| 8318 | CDC45 | 8 | NA | NA | NA | NA | -0.09 | -0.05 | -0.10 | 0.02 | -0.18 | -0.52 |
| 5616 | PRKY | 8 | NA | NA | NA | NA | 0.05 | 0.01 | 0.03 | -0.05 | -0.18 | -0.48 |
| 4507 | MTAP | 8 | NA | NA | NA | NA | -0.05 | 0.02 | 0.04 | 0.02 | 0.02 | -0.43 |
| 1983 | EIF5 | 8 | NA | NA | NA | NA | -0.07 | -0.02 | -0.04 | -0.01 | -0.18 | -0.40 |
| 10528 | NOP56 | 8 | NA | NA | NA | NA | -0.03 | 0.07 | 0.02 | 0.01 | -0.16 | -0.52 |
| 79863 | RBFA | 8 | NA | NA | NA | NA | 0.00 | -0.01 | 0.04 | 0.03 | -0.17 | -0.50 |
| 5422 | POLA1 | 8 | NA | NA | NA | NA | 0.03 | 0.00 | 0.01 | 0.02 | -0.16 | -0.38 |
| 91851 | CHRDL1 | 8 | NA | NA | NA | NA | 0.00 | 0.02 | -0.06 | -0.04 | -0.15 | -0.48 |
| 5230 | PGK1 | 8 | NA | NA | NA | NA | -0.09 | -0.03 | -0.07 | 0.06 | -0.17 | -0.41 |
| 259232 | NALCN | 8 | NA | NA | NA | NA | -0.12 | -0.05 | -0.06 | -0.01 | -0.13 | -0.45 |
| 10166 | SLC25A15 | 8 | NA | NA | NA | NA | -0.09 | -0.07 | -0.08 | 0.07 | -0.21 | -0.54 |
| 1723 | DHODH | 8 | NA | NA | NA | NA | 0.02 | 0.10 | 0.00 | 0.05 | -0.17 | -0.40 |
| 57478 | USP31 | 8 | NA | NA | NA | NA | 0.01 | -0.04 | 0.05 | -0.07 | -0.22 | -0.45 |
| 56986 | DTWD1 | 8 | NA | NA | NA | NA | -0.09 | -0.07 | -0.07 | -0.05 | -0.16 | -0.40 |
| 2553;55056 | GABPB1;FLJ10038 | 8 | NA | NA | NA | NA | -0.12 | -0.06 | -0.11 | -0.04 | -0.15 | -0.43 |
| 55621 | TRMT1 | 8 | NA | NA | NA | NA | 0.01 | 0.07 | 0.01 | -0.06 | -0.15 | -0.41 |
| 9141 | PDCD5 | 8 | NA | NA | NA | NA | 0.02 | 0.10 | -0.05 | 0.10 | -0.18 | -0.41 |
| 1021 | CDK6 | 8 | NA | NA | NA | NA | 0.03 | -0.03 | 0.08 | -0.08 | -0.03 | -0.43 |
| 8701 | DNAH11 | 8 | NA | NA | NA | NA | -0.14 | -0.06 | -0.14 | 0.06 | -0.11 | -0.47 |
| 5764 | PTN | 8 | NA | NA | NA | NA | -0.11 | 0.12 | -0.09 | -0.02 | -0.04 | -0.39 |
| 4233 | MET | 8 | NA | NA | NA | NA | 0.00 | -0.10 | -0.05 | 0.00 | -0.17 | -0.40 |
| 79974 | CPED1 | 8 | NA | NA | NA | NA | -0.12 | 0.03 | -0.09 | -0.01 | -0.18 | -0.38 |
| 7046 | TGFBR1 | 8 | NA | NA | NA | NA | -0.04 | -0.03 | 0.03 | -0.03 | -0.03 | -0.44 |
| 1787 | TRDMT1 | 8 | NA | NA | NA | NA | -0.08 | -0.09 | -0.05 | -0.05 | -0.10 | -0.38 |
| 708 | C1QBP | 8 | NA | NA | NA | NA | -0.07 | 0.04 | -0.10 | 0.09 | -0.13 | -0.43 |
| 23531 | MMD | 8 | NA | NA | NA | NA | -0.14 | -0.14 | -0.12 | -0.12 | -0.11 | -0.40 |
| 8821 | INPP4B | 8 | NA | NA | NA | NA | -0.11 | -0.05 | -0.06 | 0.00 | 0.05 | -0.46 |
| 2054 | STX2 | 8 | NA | NA | NA | NA | -0.09 | -0.02 | -0.04 | 0.01 | -0.07 | -0.49 |
| 51559 | NT5DC3 | 8 | NA | NA | NA | NA | 0.02 | -0.05 | 0.09 | -0.04 | -0.15 | -0.42 |
| 55003 | PAK1IP1 | 8 | NA | NA | NA | NA | -0.13 | 0.03 | -0.10 | 0.07 | -0.12 | -0.46 |
| 7164 | TPD52L1 | 8 | NA | NA | NA | NA | -0.05 | -0.09 | -0.08 | -0.01 | -0.07 | -0.40 |
| 705 | BYSL | 8 | NA | NA | NA | NA | -0.21 | -0.06 | -0.10 | -0.07 | -0.17 | -0.39 |
| 6722 | SRF | 8 | NA | NA | NA | NA | 0.06 | -0.05 | -0.02 | -0.10 | -0.16 | -0.46 |
| 4124 | MAN2A1 | 8 | NA | NA | NA | NA | -0.02 | -0.02 | 0.01 | -0.02 | -0.14 | -0.47 |
| 3313 | HSPA9 | 8 | NA | NA | NA | NA | -0.07 | -0.02 | -0.10 | -0.01 | -0.18 | -0.39 |
| 4015 | LOX | 8 | NA | NA | NA | NA | -0.29 | -0.10 | 0.04 | -0.10 | -0.02 | -0.52 |
| 6678 | SPARC | 8 | NA | NA | NA | NA | -0.02 | -0.02 | -0.06 | 0.03 | -0.20 | -0.46 |
| 6747 | SSR3 | 8 | NA | NA | NA | NA | -0.07 | -0.08 | -0.06 | 0.04 | -0.17 | -0.47 |
| 56902 | PNO1 | 8 | NA | NA | NA | NA | 0.00 | 0.00 | 0.03 | 0.07 | -0.14 | -0.38 |
| 390 | RND3 | 8 | NA | NA | NA | NA | -0.10 | 0.00 | -0.02 | 0.11 | 0.11 | -0.41 |
| 6675 | UAP1 | 8 | NA | NA | NA | NA | -0.12 | 0.00 | -0.04 | 0.14 | 0.03 | -0.40 |
| 2633 | GBP1 | 8 | NA | NA | NA | NA | -0.14 | -0.04 | -0.07 | 0.06 | -0.03 | -0.47 |
| 8704 | B4GALT2 | 8 | NA | NA | NA | NA | -0.07 | -0.08 | -0.07 | -0.05 | -0.24 | -0.42 |
| 10560 | SLC19A2 | 8 | NA | NA | NA | NA | -0.07 | -0.06 | -0.03 | 0.04 | -0.08 | -0.42 |
| 1266 | CNN3 | 8 | NA | NA | NA | NA | -0.04 | 0.01 | 0.01 | 0.05 | -0.06 | -0.40 |
| 27042 | DIEXF | 8 | NA | NA | NA | NA | -0.01 | -0.08 | -0.09 | -0.02 | -0.14 | -0.47 |
| 55127 | HEATR1 | 8 | NA | NA | NA | NA | -0.07 | -0.15 | -0.04 | -0.05 | -0.18 | -0.44 |
| 8727 | CTNNAL1 | 8 | NA | NA | NA | NA | -0.17 | -0.05 | -0.12 | 0.15 | -0.04 | -0.43 |
| 26094 | DCAF4 | 8 | NA | NA | NA | NA | -0.07 | -0.03 | 0.03 | 0.01 | -0.15 | -0.40 |
| 79627 | OGFRL1 | 8 | NA | NA | NA | NA | -0.09 | 0.01 | 0.01 | -0.01 | 0.13 | -0.43 |
| 5507 | PPP1R3C | 8 | NA | NA | NA | NA | -0.14 | -0.06 | -0.11 | 0.00 | -0.15 | -0.41 |
| 10171 | RCL1 | 8 | NA | NA | NA | NA | 0.02 | 0.05 | 0.06 | 0.04 | -0.13 | -0.46 |
| 39 | ACAT2 | 8 | NA | NA | NA | NA | -0.11 | -0.05 | -0.10 | 0.08 | -0.07 | -0.38 |
| 27340 | UTP20 | 8 | NA | NA | NA | NA | 0.03 | -0.06 | 0.00 | -0.01 | -0.19 | -0.41 |
| 79712 | GTDC1 | 8 | NA | NA | NA | NA | -0.13 | -0.07 | -0.13 | -0.13 | -0.28 | -0.41 |
| 92 | ACVR2A | 8 | NA | NA | NA | NA | -0.01 | -0.12 | -0.08 | -0.07 | -0.20 | -0.38 |
| 5412 | UBL3 | 8 | NA | NA | NA | NA | -0.03 | 0.01 | 0.05 | -0.06 | -0.03 | -0.45 |
| 10124 | ARL4A | 8 | NA | NA | NA | NA | -0.12 | -0.01 | -0.02 | 0.00 | 0.01 | -0.49 |
| 10549 | PRDX4 | 8 | NA | NA | NA | NA | -0.10 | -0.02 | -0.14 | 0.13 | -0.18 | -0.41 |
| 57486 | NLN | 8 | NA | NA | NA | NA | -0.04 | -0.05 | -0.05 | -0.03 | -0.15 | -0.55 |
| 29078 | NDUFAF4 | 8 | NA | NA | NA | NA | -0.10 | -0.02 | -0.10 | 0.03 | -0.16 | -0.42 |
| 84693 | MCEE | 8 | NA | NA | NA | NA | -0.11 | -0.14 | -0.18 | -0.07 | -0.17 | -0.39 |
| 30833 | NT5C | 8 | NA | NA | NA | NA | 0.02 | 0.05 | -0.03 | 0.03 | -0.12 | -0.38 |
| 64794 | DDX31 | 8 | NA | NA | NA | NA | -0.02 | -0.03 | -0.03 | 0.01 | -0.14 | -0.44 |
| 84172 | POLR1B | 8 | NA | NA | NA | NA | -0.07 | -0.09 | -0.06 | -0.03 | -0.19 | -0.46 |
| 112849 | L3HYPDH | 8 | NA | NA | NA | NA | -0.11 | -0.08 | -0.14 | 0.01 | -0.14 | -0.45 |
| 1678 | TIMM8A | 8 | NA | NA | NA | NA | -0.06 | 0.06 | 0.00 | -0.01 | -0.12 | -0.38 |
| 8459 | TPST2 | 8 | NA | NA | NA | NA | -0.02 | -0.09 | -0.08 | 0.03 | -0.23 | -0.53 |
| 91860 | CALML4 | 8 | NA | NA | NA | NA | -0.04 | 0.01 | -0.07 | -0.11 | -0.11 | -0.38 |
| 60559 | SPCS3 | 8 | NA | NA | NA | NA | -0.09 | -0.03 | 0.03 | -0.05 | 0.04 | -0.40 |
| 1736 | DKC1 | 8 | NA | NA | NA | NA | -0.03 | 0.09 | 0.04 | -0.01 | -0.14 | -0.56 |
| 29107 | NXT1 | 8 | NA | NA | NA | NA | 0.00 | 0.02 | -0.11 | 0.14 | -0.16 | -0.50 |
| 163782 | KANK4 | 8 | NA | NA | NA | NA | -0.17 | -0.10 | -0.02 | -0.25 | -0.11 | -0.45 |
| 7223 | TRPC4 | 8 | NA | NA | NA | NA | -0.06 | 0.01 | 0.02 | 0.07 | -0.02 | -0.53 |
| 9816 | URB2 | 8 | NA | NA | NA | NA | -0.02 | 0.00 | 0.06 | 0.09 | -0.07 | -0.52 |
| 9882 | TBC1D4 | 8 | NA | NA | NA | NA | -0.05 | -0.01 | 0.04 | 0.05 | -0.01 | -0.43 |
| 58489 | ABHD17C | 8 | NA | NA | NA | NA | -0.03 | 0.07 | 0.05 | -0.04 | -0.13 | -0.47 |
| 10244 | RABEPK | 8 | NA | NA | NA | NA | -0.01 | -0.01 | -0.06 | 0.03 | -0.17 | -0.52 |
| 64425 | POLR1E | 8 | NA | NA | NA | NA | -0.12 | -0.07 | -0.06 | 0.07 | -0.07 | -0.48 |
| 6941 | TCF19 | 8 | NA | NA | NA | NA | -0.02 | -0.05 | -0.04 | 0.05 | -0.15 | -0.50 |
| 109 | ADCY3 | 8 | NA | NA | NA | NA | 0.03 | 0.03 | 0.09 | 0.03 | -0.20 | -0.38 |
| 316 | AOX1 | 8 | NA | NA | NA | NA | -0.09 | -0.08 | -0.07 | -0.03 | -0.15 | -0.48 |
| 55752 | 11-Sep | 8 | NA | NA | NA | NA | -0.07 | -0.05 | -0.02 | -0.06 | -0.18 | -0.44 |
| 306 | ANXA3 | 8 | NA | NA | NA | NA | -0.15 | -0.05 | -0.10 | 0.08 | -0.10 | -0.56 |
| 122786 | FRMD6 | 8 | NA | NA | NA | NA | -0.05 | -0.02 | 0.02 | 0.07 | 0.00 | -0.53 |
| 6875 | TAF4B | 8 | NA | NA | NA | NA | -0.03 | -0.01 | -0.04 | 0.01 | -0.20 | -0.49 |
| 201292 | TRIM65 | 8 | NA | NA | NA | NA | -0.04 | -0.02 | -0.03 | 0.00 | -0.21 | -0.50 |
| 57645 | POGK | 8 | NA | NA | NA | NA | -0.04 | -0.05 | -0.04 | 0.01 | -0.09 | -0.39 |
| 27303 | RBMS3 | 8 | NA | NA | NA | NA | 0.01 | -0.04 | 0.02 | -0.11 | -0.07 | -0.50 |
| 90102 | PHLDB2 | 8 | NA | NA | NA | NA | -0.06 | -0.04 | 0.00 | 0.05 | 0.05 | -0.40 |
| 58477 | SRPRB | 8 | NA | NA | NA | NA | -0.09 | -0.04 | -0.07 | 0.04 | -0.21 | -0.52 |
| 56034 | PDGFC | 8 | NA | NA | NA | NA | 0.00 | -0.07 | -0.02 | 0.03 | -0.05 | -0.43 |
| 6502 | SKP2 | 8 | NA | NA | NA | NA | -0.03 | 0.00 | 0.02 | 0.04 | -0.07 | -0.46 |
| 10769 | PLK2 | 8 | NA | NA | NA | NA | -0.09 | -0.01 | -0.03 | 0.08 | -0.01 | -0.54 |
| 10184 | LHFPL2 | 8 | NA | NA | NA | NA | 0.08 | -0.02 | 0.03 | 0.00 | -0.17 | -0.40 |
| 27147 | DENND2A | 8 | NA | NA | NA | NA | -0.01 | -0.01 | 0.05 | 0.00 | -0.09 | -0.40 |
| 51312 | SLC25A37 | 8 | NA | NA | NA | NA | 0.03 | -0.05 | 0.05 | -0.02 | -0.03 | -0.41 |
| 6251 | RSU1 | 8 | NA | NA | NA | NA | -0.09 | -0.05 | -0.11 | -0.08 | -0.22 | -0.45 |
| 2746 | GLUD1 | 8 | NA | NA | NA | NA | -0.09 | -0.04 | -0.11 | 0.04 | -0.15 | -0.41 |
| 3992 | FADS1 | 8 | NA | NA | NA | NA | -0.06 | -0.01 | -0.01 | 0.05 | -0.06 | -0.41 |
| 116372 | LYPD1 | 8 | NA | NA | NA | NA | 0.00 | -0.02 | -0.02 | 0.04 | -0.12 | -0.38 |
| 57647 | DHX37 | 8 | NA | NA | NA | NA | 0.01 | 0.01 | 0.05 | 0.01 | -0.13 | -0.42 |
| 81792 | ADAMTS12 | 8 | NA | NA | NA | NA | 0.03 | -0.06 | 0.00 | 0.02 | -0.20 | -0.50 |
| 26278 | SACS | 8 | NA | NA | NA | NA | -0.13 | -0.11 | 0.02 | 0.00 | 0.04 | -0.42 |
| 2674 | GFRA1 | 8 | NA | NA | NA | NA | 0.01 | -0.02 | 0.00 | -0.01 | -0.19 | -0.53 |
| 53354 | PANK1 | 8 | NA | NA | NA | NA | -0.12 | -0.03 | -0.06 | -0.05 | -0.11 | -0.40 |
| 5796 | PTPRK | 8 | NA | NA | NA | NA | 0.00 | -0.03 | 0.00 | -0.05 | -0.15 | -0.39 |
| 5352 | PLOD2 | 8 | NA | NA | NA | NA | -0.12 | 0.00 | 0.00 | 0.02 | 0.01 | -0.42 |
| 166647 | ADGRA3 | 8 | NA | NA | NA | NA | -0.07 | -0.04 | -0.04 | -0.04 | -0.27 | -0.52 |
| 55022 | PID1 | 8 | NA | NA | NA | NA | 0.00 | -0.04 | 0.00 | -0.02 | -0.17 | -0.48 |
| 27295 | PDLIM3 | 8 | NA | NA | NA | NA | -0.03 | -0.02 | -0.06 | 0.02 | -0.10 | -0.39 |
| 55326 | AGPAT5 | 8 | NA | NA | NA | NA | -0.11 | 0.00 | -0.02 | 0.02 | -0.05 | -0.43 |
| 84365 | NIFK | 8 | NA | NA | NA | NA | -0.08 | 0.03 | -0.04 | 0.13 | -0.05 | -0.51 |
| 134353 | LSM11 | 8 | NA | NA | NA | NA | -0.05 | -0.02 | 0.01 | -0.01 | -0.22 | -0.42 |
| 7804 | LRP8 | 8 | NA | NA | NA | NA | -0.03 | -0.05 | -0.08 | -0.04 | -0.17 | -0.41 |
| 114793 | FMNL2 | 8 | NA | NA | NA | NA | -0.03 | 0.02 | 0.00 | -0.01 | -0.08 | -0.40 |
| 54935 | DUSP23 | 8 | NA | NA | NA | NA | -0.03 | 0.00 | -0.07 | 0.03 | -0.23 | -0.41 |
| 2618 | GART | 8 | NA | NA | NA | NA | -0.03 | -0.08 | -0.04 | -0.01 | -0.16 | -0.41 |
| 1465 | CSRP1 | 8 | NA | NA | NA | NA | -0.05 | -0.01 | -0.02 | 0.08 | -0.08 | -0.49 |
| 30815 | ST6GALNAC6 | 8 | NA | NA | NA | NA | -0.09 | -0.05 | -0.04 | 0.03 | -0.12 | -0.44 |
| 126321 | MFSD12 | 8 | NA | NA | NA | NA | 0.05 | 0.01 | 0.02 | -0.02 | -0.18 | -0.40 |
| 4356 | MPP3 | 8 | NA | NA | NA | NA | -0.03 | 0.02 | -0.06 | -0.07 | -0.06 | -0.39 |
| 10691 | GMEB1 | 8 | NA | NA | NA | NA | -0.08 | 0.02 | -0.02 | -0.06 | -0.15 | -0.41 |
| 25893 | TRIM58 | 8 | NA | NA | NA | NA | 0.11 | -0.01 | -0.01 | -0.02 | -0.12 | -0.56 |
| 824 | CAPN2 | 8 | NA | NA | NA | NA | -0.04 | 0.00 | 0.03 | 0.06 | -0.05 | -0.42 |
| 200916 | RPL22L1 | 8 | NA | NA | NA | NA | -0.13 | 0.06 | -0.06 | 0.11 | -0.12 | -0.39 |
| 1359 | CPA3 | 8 | NA | NA | NA | NA | -0.20 | -0.08 | -0.18 | 0.03 | -0.17 | -0.39 |
| 23160 | WDR43 | 8 | NA | NA | NA | NA | -0.12 | -0.04 | -0.06 | 0.03 | -0.01 | -0.43 |
| 26354 | GNL3 | 8 | NA | NA | NA | NA | -0.13 | 0.02 | -0.09 | 0.09 | 0.00 | -0.45 |
| 6059 | ABCE1 | 8 | NA | NA | NA | NA | -0.12 | -0.08 | -0.08 | 0.01 | -0.08 | -0.45 |
| 91942 | NDUFAF2 | 8 | NA | NA | NA | NA | -0.20 | 0.05 | -0.11 | 0.07 | -0.10 | -0.44 |
| 115908 | CTHRC1 | 8 | NA | NA | NA | NA | -0.06 | -0.02 | 0.04 | 0.09 | -0.10 | -0.49 |
| 2395 | FXN | 8 | NA | NA | NA | NA | -0.11 | -0.01 | 0.10 | -0.07 | -0.22 | -0.41 |
| 256691 | MAMDC2 | 8 | NA | NA | NA | NA | -0.07 | -0.03 | 0.00 | 0.01 | -0.03 | -0.38 |
| 58526 | MID1IP1 | 8 | NA | NA | NA | NA | 0.05 | -0.01 | -0.07 | 0.01 | -0.20 | -0.46 |
| 7570 | ZNF22 | 8 | NA | NA | NA | NA | -0.15 | -0.03 | -0.08 | 0.00 | -0.10 | -0.38 |
| 115708 | TRMT61A | 8 | NA | NA | NA | NA | -0.03 | -0.02 | -0.04 | 0.03 | -0.16 | -0.40 |
| 118490 | MSS51 | 8 | NA | NA | NA | NA | -0.09 | -0.15 | 0.12 | -0.12 | -0.16 | -0.38 |
| 201161 | CENPV | 8 | NA | NA | NA | NA | -0.09 | -0.03 | -0.11 | 0.03 | -0.14 | -0.39 |
| 4837 | NNMT | 8 | NA | NA | NA | NA | -0.08 | 0.00 | -0.07 | 0.12 | -0.16 | -0.53 |
| 7705 | ZNF146 | 8 | NA | NA | NA | NA | -0.17 | -0.03 | -0.06 | 0.04 | -0.07 | -0.40 |
| 84798 | C19orf48 | 8 | NA | NA | NA | NA | 0.03 | -0.05 | -0.03 | 0.05 | -0.26 | -0.39 |
| 29091 | STXBP6 | 8 | NA | NA | NA | NA | -0.02 | 0.00 | 0.01 | 0.05 | 0.00 | -0.44 |
| 6383 | SDC2 | 8 | NA | NA | NA | NA | -0.06 | -0.02 | -0.04 | 0.00 | -0.06 | -0.47 |
| 5099 | PCDH7 | 8 | NA | NA | NA | NA | 0.01 | -0.10 | -0.03 | -0.03 | -0.07 | -0.38 |
| 51621 | KLF13 | 8 | NA | NA | NA | NA | -0.04 | 0.00 | 0.05 | 0.06 | -0.01 | -0.42 |
| 84140 | FAM161A | 8 | NA | NA | NA | NA | -0.18 | -0.04 | -0.01 | -0.17 | -0.11 | -0.42 |
| 9723 | SEMA3E | 8 | NA | NA | NA | NA | -0.02 | 0.01 | -0.06 | -0.07 | -0.23 | -0.55 |
| 81831 | NETO2 | 8 | NA | NA | NA | NA | -0.10 | -0.01 | -0.10 | -0.01 | -0.07 | -0.43 |
| 92126 | DSEL | 8 | NA | NA | NA | NA | 0.05 | -0.05 | -0.01 | 0.03 | -0.15 | -0.51 |
| 55144 | LRRC8D | 8 | NA | NA | NA | NA | 0.04 | -0.05 | -0.01 | -0.02 | -0.07 | -0.40 |
| 1503 | CTPS1 | 8 | NA | NA | NA | NA | -0.09 | 0.04 | 0.12 | 0.00 | -0.12 | -0.48 |
| 6241 | RRM2 | 8 | NA | NA | NA | NA | -0.03 | -0.02 | 0.07 | 0.00 | -0.12 | -0.41 |
| 154141 | MBOAT1 | 8 | NA | NA | NA | NA | -0.04 | -0.08 | -0.05 | -0.01 | -0.27 | -0.52 |
| 64318 | NOC3L | 8 | NA | NA | NA | NA | -0.13 | 0.05 | -0.08 | 0.07 | -0.04 | -0.39 |
| 84826 | SFT2D3 | 8 | NA | NA | NA | NA | -0.12 | -0.05 | -0.13 | -0.03 | -0.10 | -0.38 |
| 115123 | 03-Mar | 8 | NA | NA | NA | NA | -0.05 | -0.06 | -0.06 | 0.05 | -0.20 | -0.52 |
| 155185 | AMZ1 | 8 | NA | NA | NA | NA | -0.08 | 0.04 | 0.09 | -0.07 | -0.18 | -0.52 |
| 1466 | CSRP2 | 8 | NA | NA | NA | NA | -0.10 | 0.01 | -0.12 | 0.07 | -0.12 | -0.39 |
| 9134 | CCNE2 | 8 | NA | NA | NA | NA | -0.14 | -0.07 | -0.05 | 0.04 | 0.07 | -0.51 |
| 219749 | ZNF25 | 8 | NA | NA | NA | NA | -0.15 | 0.03 | -0.02 | -0.04 | -0.16 | -0.48 |
| 664 | BNIP3 | 8 | NA | NA | NA | NA | -0.06 | 0.00 | -0.10 | -0.05 | -0.25 | -0.54 |
| 666 | BOK | 8 | NA | NA | NA | NA | -0.03 | -0.06 | -0.03 | 0.06 | -0.24 | -0.41 |
| 80010 | RMI1 | 8 | NA | NA | NA | NA | -0.46 | -0.11 | -0.05 | -0.12 | -0.14 | -0.32 |
| 23526 | HMHA1 | 8 | NA | NA | NA | NA | 0.04 | 0.04 | -0.03 | 0.09 | -0.07 | -0.40 |
| 151963 | MB21D2 | 8 | NA | NA | NA | NA | -0.11 | -0.03 | 0.01 | 0.15 | 0.08 | -0.49 |
| 79642 | ARSJ | 8 | NA | NA | NA | NA | -0.05 | 0.02 | -0.01 | 0.02 | -0.03 | -0.54 |
| 4869 | NPM1 | 8 | NA | NA | NA | NA | -0.19 | -0.05 | -0.12 | 0.08 | -0.04 | -0.41 |
| 399664 | MEX3D | 8 | NA | NA | NA | NA | -0.13 | 0.02 | -0.13 | -0.13 | -0.17 | -0.42 |
| 90355 | C5orf30 | 8 | NA | NA | NA | NA | -0.04 | -0.01 | 0.01 | 0.05 | 0.05 | -0.42 |
| 2131 | EXT1 | 8 | NA | NA | NA | NA | -0.06 | 0.00 | 0.04 | 0.07 | 0.01 | -0.47 |
| 25825 | BACE2 | 8 | NA | NA | NA | NA | -0.12 | 0.01 | -0.03 | -0.04 | -0.21 | -0.47 |
| 2621 | GAS6 | 8 | NA | NA | NA | NA | -0.06 | -0.05 | -0.03 | 0.06 | -0.18 | -0.42 |
| 119559 | SFXN4 | 8 | NA | NA | NA | NA | -0.06 | -0.04 | -0.08 | 0.09 | -0.15 | -0.40 |
| 126382 | NR2C2AP | 8 | NA | NA | NA | NA | -0.07 | -0.10 | -0.08 | 0.07 | -0.17 | -0.39 |
| 11260 | XPOT | 8 | NA | NA | NA | NA | -0.10 | -0.02 | -0.07 | -0.04 | -0.15 | -0.43 |
| 10196 | PRMT3 | 8 | NA | NA | NA | NA | -0.13 | -0.02 | -0.08 | -0.08 | -0.14 | -0.44 |
| 4919 | ROR1 | 8 | NA | NA | NA | NA | 0.07 | -0.02 | 0.06 | 0.03 | -0.14 | -0.48 |
| 79896 | THNSL1 | 8 | NA | NA | NA | NA | -0.21 | -0.14 | -0.16 | -0.08 | -0.19 | -0.38 |
| 3638 | INSIG1 | 8 | NA | NA | NA | NA | -0.10 | -0.07 | 0.01 | 0.17 | 0.13 | -0.46 |
| 129293;105374836 | TRABD2A;LOC105374836 | 8 | NA | NA | NA | NA | -0.11 | -0.06 | -0.04 | 0.08 | -0.04 | -0.42 |
| 55893 | ZNF395 | 8 | NA | NA | NA | NA | -0.02 | -0.03 | -0.03 | 0.00 | -0.19 | -0.44 |
| 130574 | LYPD6 | 8 | NA | NA | NA | NA | -0.10 | -0.14 | -0.15 | 0.07 | -0.07 | -0.38 |
| 4501 | MT1X | 8 | NA | NA | NA | NA | -0.10 | 0.07 | -0.02 | 0.03 | -0.12 | -0.39 |
| 91404 | SESTD1 | 8 | NA | NA | NA | NA | -0.07 | -0.10 | -0.05 | -0.07 | -0.19 | -0.44 |
| 5757;728026 | PTMA;LOC728026 | 8 | NA | NA | NA | NA | -0.06 | 0.04 | -0.06 | -0.03 | -0.03 | -0.39 |
| 79048 | SECISBP2 | 8 | NA | NA | NA | NA | -0.06 | -0.07 | -0.11 | -0.08 | -0.20 | -0.47 |
| 388115 | C15orf52 | 8 | NA | NA | NA | NA | -0.32 | 0.05 | -0.01 | -0.03 | -0.02 | -0.55 |
| 84154 | RPF2 | 8 | NA | NA | NA | NA | -0.07 | 0.04 | -0.06 | 0.08 | -0.03 | -0.38 |
| 57547 | ZNF624 | 8 | NA | NA | NA | NA | -0.14 | -0.07 | -0.05 | -0.08 | -0.23 | -0.40 |
| 55210 | ATAD3A | 8 | NA | NA | NA | NA | -0.01 | 0.04 | 0.00 | 0.05 | -0.24 | -0.47 |
| NA | NA | 8 | NA | NA | NA | NA | -0.10 | 0.03 | -0.10 | 0.06 | -0.07 | -0.52 |
| 54898 | ELOVL2 | 8 | NA | NA | NA | NA | 0.02 | 0.05 | 0.01 | 0.02 | -0.10 | -0.44 |
| 115701 | ALPK2 | 8 | NA | NA | NA | NA | -0.03 | 0.00 | -0.01 | 0.01 | -0.03 | -0.48 |
| 7052 | TGM2 | 8 | NA | NA | NA | NA | 0.08 | -0.27 | 0.02 | 0.08 | -0.08 | -0.57 |
| 7407 | VARS | 8 | NA | NA | NA | NA | -0.05 | 0.00 | 0.06 | -0.07 | -0.21 | -0.42 |
| 5987 | TRIM27 | 8 | NA | NA | NA | NA | -0.08 | -0.07 | -0.07 | 0.04 | -0.17 | -0.44 |
| 29902 | FAM216A | 8 | NA | NA | NA | NA | -0.10 | -0.03 | -0.15 | -0.01 | -0.15 | -0.48 |
| 10206 | TRIM13 | 8 | NA | NA | NA | NA | -0.07 | -0.06 | 0.00 | 0.04 | -0.06 | -0.40 |
| 7114 | TMSB4X | 8 | NA | NA | NA | NA | 0.05 | 0.03 | -0.05 | 0.11 | -0.13 | -0.41 |
| NA | NA | 8 | NA | NA | NA | NA | -0.13 | -0.08 | 0.02 | 0.08 | 0.06 | -0.42 |
| 389136 | VGLL3 | 8 | NA | NA | NA | NA | 0.04 | -0.09 | 0.04 | -0.13 | 0.07 | -0.47 |
| 693206 | MIR621 | 8 | NA | NA | NA | NA | -0.16 | -0.26 | -0.23 | -0.09 | -0.33 | -0.46 |
| 2013 | EMP2 | 8 | NA | NA | NA | NA | -0.02 | -0.05 | -0.07 | -0.05 | -0.22 | -0.39 |
| 7866 | IFRD2 | 8 | NA | NA | NA | NA | 0.09 | 0.04 | 0.02 | 0.03 | -0.17 | -0.41 |
| NA | NA | 8 | NA | NA | NA | NA | -0.12 | -0.05 | -0.12 | -0.08 | -0.17 | -0.43 |
| NA | NA | 8 | NA | NA | NA | NA | -0.04 | 0.04 | -0.05 | 0.14 | 0.01 | -0.43 |
| NA | NA | 8 | NA | NA | NA | NA | -0.04 | 0.07 | -0.12 | -0.02 | -0.13 | -0.39 |
| NA | NA | 8 | NA | NA | NA | NA | -0.16 | -0.11 | -0.14 | -0.09 | -0.29 | -0.39 |
| 60674 | GAS5 | 8 | NA | NA | NA | NA | 0.03 | 0.06 | -0.03 | 0.01 | -0.20 | -0.50 |
| 4830 | NME1 | 8 | NA | NA | NA | NA | 0.04 | 0.05 | -0.06 | 0.11 | -0.18 | -0.42 |
| 692099 | FAM86DP | 8 | NA | NA | NA | NA | -0.02 | -0.15 | -0.01 | -0.05 | -0.09 | -0.42 |
| NA | NA | 8 | NA | NA | NA | NA | -0.16 | -0.16 | -0.12 | -0.16 | -0.08 | -0.44 |
| 54984 | PINX1 | 8 | NA | NA | NA | NA | 0.00 | 0.04 | -0.01 | 0.04 | -0.08 | -0.48 |
| 23246 | BOP1 | 8 | NA | NA | NA | NA | 0.02 | 0.02 | -0.01 | 0.05 | -0.24 | -0.51 |
| NA | NA | 8 | NA | NA | NA | NA | -0.20 | -0.17 | 0.00 | -0.21 | -0.07 | -0.44 |
| 100287616 | LOXL1-AS1 | 8 | NA | NA | NA | NA | 0.06 | -0.03 | 0.02 | -0.05 | -0.16 | -0.39 |
| 148189 | LINC00662 | 8 | NA | NA | NA | NA | -0.12 | -0.02 | -0.16 | -0.11 | -0.26 | -0.46 |
| 26851 | SNORD3B-1 | 8 | NA | NA | NA | NA | -0.18 | -0.09 | -0.11 | -0.13 | -0.24 | -0.38 |
| NA | NA | 8 | NA | NA | NA | NA | -0.03 | -0.15 | 0.06 | 0.03 | 0.08 | -0.38 |
| NA | NA | 8 | NA | NA | NA | NA | -0.10 | -0.23 | -0.24 | -0.07 | -0.07 | -0.42 |
| NA | NA | 8 | NA | NA | NA | NA | -0.03 | -0.02 | -0.04 | -0.01 | -0.16 | -0.40 |
| NA | NA | 8 | NA | NA | NA | NA | -0.17 | -0.22 | -0.14 | -0.02 | -0.15 | -0.42 |
| 6482 | ST3GAL1 | 9 | Linear | 1.7 | 0.6 | 61.8 | 0.07 | 0.03 | 0.05 | -0.02 | -0.20 | -0.98 |
| 9369 | NRXN3 | 9 | Exp 2 | 1.7 | 0.4 | 156.4 | 0.25 | 0.09 | 0.10 | -0.15 | -0.50 | -0.94 |
| 2042 | EPHA3 | 9 | Exp 2 | 1.2 | 0.9 | -4.4 | 0.04 | -0.02 | -0.11 | -0.10 | -0.41 | -0.88 |
| 55117 | SLC6A15 | 9 | Exp 2 | 1.1 | 0.8 | 120.6 | -0.09 | -0.06 | -0.15 | -0.14 | -0.57 | -1.16 |
| 151887 | CCDC80 | 9 | Exp 2 | 1.2 | 0.2 | 364.1 | 0.10 | 0.21 | 0.12 | -0.16 | -0.45 | -1.07 |
| 6319 | SCD | 9 | Exp 2 | 0.9 | 1 | 224.4 | 0.04 | 0.03 | 0.03 | -0.05 | -0.40 | -1.04 |
| 6387 | CXCL12 | 9 | Linear | 1.7 | 0.8 | 48.6 | -0.12 | -0.07 | -0.18 | -0.22 | -0.50 | -1.14 |
| 9037 | SEMA5A | 9 | Exp 2 | 1.7 | 0.6 | 165.8 | 0.14 | -0.14 | 0.01 | -0.19 | -0.59 | -1.16 |
| 3488 | IGFBP5 | 9 | Linear | 2.7 | 0.8 | 155.6 | 0.25 | 0.12 | 0.15 | 0.02 | -0.21 | -1.27 |
| 5396 | PRRX1 | 9 | Poly 2 | 3.5 | 0.4 | 65.8 | 0.04 | -0.12 | -0.06 | 0.00 | -0.17 | -1.01 |
| 8828 | NRP2 | 9 | Exp 2 | 2.1 | 0.7 | 173.5 | 0.21 | 0.07 | 0.07 | -0.03 | -0.33 | -0.83 |
| 3007 | HIST1H1D | 9 | Exp 5 | 1.8 | 0.2 | 167.4 | -0.08 | -0.05 | -0.17 | -0.02 | -0.65 | -0.98 |
| 3024 | HIST1H1A | 9 | Exp 4 | 0.5 | 0.6 | 133.6 | 0.08 | 0.11 | -0.02 | -0.11 | -0.51 | -0.94 |
| 8970 | HIST1H2BJ | 9 | Exp 2 | 1.6 | 0.4 | 296.9 | 0.14 | 0.17 | -0.02 | 0.01 | -0.52 | -0.88 |
| 55504 | TNFRSF19 | 9 | Linear | 2.1 | 0.9 | 200.2 | 0.04 | -0.06 | 0.01 | 0.04 | -0.24 | -1.04 |
| 3872 | KRT17 | 9 | Linear | 1.9 | 0.8 | 320.7 | 0.10 | 0.08 | 0.05 | 0.11 | -0.25 | -0.93 |
| 9315 | NREP | 9 | Linear | 2.3 | 0.7 | 220.5 | -0.05 | -0.08 | -0.12 | -0.07 | -0.25 | -0.97 |
| 5570 | PKIB | 9 | Exp 2 | 1.4 | 0.6 | 29.1 | -0.09 | -0.04 | -0.12 | -0.09 | -0.40 | -0.93 |
| 3756 | KCNH1 | 9 | Exp 4 | 0.6 | 0.3 | 48.9 | 0.08 | -0.14 | -0.06 | -0.27 | -0.70 | -1.08 |
| 6769 | STAC | 9 | Exp 2 | 1.1 | 0.9 | 74.2 | 0.02 | -0.04 | -0.05 | -0.06 | -0.39 | -0.82 |
| 185 | AGTR1 | 9 | Poly 2 | 1.3 | 0.7 | 12.4 | -0.05 | -0.09 | -0.12 | -0.16 | -0.49 | -0.78 |
| 1404 | HAPLN1 | 9 | Poly 2 | 2.6 | 0.5 | 205.6 | -0.08 | -0.03 | -0.05 | 0.03 | -0.16 | -1.05 |
| 57451 | TENM2 | 9 | Linear | 1.7 | 0.7 | 235 | 0.21 | 0.09 | 0.19 | 0.01 | -0.33 | -1.16 |
| 6581 | SLC22A3 | 9 | Exp 2 | 1.6 | 0.9 | 37.9 | 0.11 | -0.01 | 0.06 | -0.08 | -0.32 | -0.86 |
| 3486 | IGFBP3 | 9 | Linear | 1.3 | 0.7 | 275 | 0.11 | -0.03 | 0.01 | 0.02 | -0.32 | -1.19 |
| 5651 | TMPRSS15 | 9 | Linear | 2.9 | 1 | 54 | -0.11 | 0.00 | -0.04 | -0.08 | -0.28 | -0.87 |
| 5137 | PDE1C | 9 | Exp 2 | 0.9 | 0.9 | 195.7 | 0.00 | -0.04 | -0.06 | -0.08 | -0.41 | -1.06 |
| 3084 | NRG1 | 9 | Exp 2 | 2.5 | 0.2 | 177.7 | 0.20 | -0.17 | -0.15 | -0.17 | -0.60 | -1.12 |
| 3017 | HIST1H2BD | 9 | Poly 2 | 0.8 | 0.2 | 311.1 | 0.08 | 0.17 | -0.04 | -0.01 | -0.50 | -0.92 |
| 8365 | HIST1H4H | 9 | Exp 4 | 1.1 | 0.5 | 286.6 | 0.13 | 0.19 | 0.05 | -0.06 | -0.57 | -0.88 |
| 3099 | HK2 | 9 | Exp 2 | 2.2 | 0.8 | 216.7 | 0.14 | 0.17 | 0.33 | 0.06 | -0.31 | -1.01 |
| 55083 | KIF26B | 9 | Poly 2 | 0.9 | 0.6 | -27.6 | 0.02 | 0.08 | 0.06 | -0.10 | -0.53 | -1.02 |
| 3625 | INHBB | 9 | Exp 2 | 3.4 | 1 | 147.3 | 0.00 | 0.03 | -0.01 | -0.09 | -0.52 | -1.31 |
| 2171 | FABP5 | 9 | Poly 2 | 1 | 0.7 | 66.2 | -0.06 | -0.03 | 0.02 | -0.17 | -0.58 | -0.80 |
| 3008 | HIST1H1E | 9 | Poly 2 | 0.5 | 0.3 | 319.1 | -0.02 | 0.06 | -0.15 | -0.12 | -0.81 | -1.33 |
| 157638 | FAM84B | 9 | Linear | 1.8 | 0.8 | 242.1 | -0.05 | 0.01 | -0.02 | 0.00 | -0.20 | -0.90 |
| 57484 | RNF150 | 9 | Exp 4 | 0.9 | 0.9 | 92.7 | 0.08 | -0.01 | 0.01 | -0.15 | -0.48 | -0.89 |
| 9242 | MSC | 9 | Exp 2 | 3.8 | 1 | 169.9 | 0.00 | 0.02 | 0.03 | -0.03 | -0.34 | -0.89 |
| 8347 | HIST1H2BC | 9 | Poly 2 | 0.7 | 0.1 | 248.8 | 0.05 | 0.16 | -0.07 | -0.03 | -0.51 | -0.91 |
| 387914 | SHISA2 | 9 | Linear | 2.1 | 0.9 | 1.7 | 0.00 | 0.02 | 0.01 | 0.01 | -0.29 | -0.85 |
| 5069 | PAPPA | 9 | Exp 3 | 3.3 | 0.8 | 106.8 | 0.07 | 0.12 | 0.16 | 0.06 | -0.17 | -1.04 |
| 147372 | CCBE1 | 9 | Linear | 0.9 | 1 | 173.3 | -0.02 | -0.01 | -0.01 | -0.08 | -0.27 | -0.82 |
| 653604 | HIST2H3D | 9 | Exp 2 | 2 | 0.4 | 153.4 | -0.14 | -0.10 | -0.16 | 0.05 | -0.85 | -1.40 |
| 8338 | HIST2H2AC | 9 | Exp 2 | 0.9 | 0 | 243 | 0.04 | 0.23 | -0.07 | 0.00 | -0.53 | -1.17 |
| 317772 | HIST2H2AB | 9 | Poly 2 | 0.6 | 0.3 | 165.6 | 0.02 | 0.11 | -0.14 | -0.08 | -0.84 | -1.38 |
| 3009 | HIST1H1B | 9 | Poly 2 | 0.6 | 0.1 | 343 | -0.11 | 0.03 | -0.15 | -0.06 | -0.76 | -1.45 |
| 8349 | HIST2H2BE | 9 | Poly 2 | 1.1 | 0.7 | 243.8 | 0.05 | 0.10 | -0.11 | -0.02 | -0.49 | -0.86 |
| 23768 | FLRT2 | 9 | Exp 2 | 2.2 | 1 | 63.6 | 0.06 | -0.07 | -0.05 | -0.11 | -0.41 | -0.80 |
| 8340 | HIST1H2BL | 9 | Poly 2 | 0.8 | 0.6 | 190.8 | 0.13 | 0.15 | -0.02 | -0.01 | -0.67 | -1.27 |
| 56479 | KCNQ5 | 9 | Exp 2 | 1.9 | 0.7 | 89.9 | 0.12 | -0.06 | -0.05 | -0.06 | -0.49 | -1.00 |
| 3006 | HIST1H1C | 9 | Exp 5 | 1.8 | 0.2 | 356.2 | -0.07 | 0.02 | -0.13 | -0.02 | -0.73 | -1.17 |
| 8329 | HIST1H2AI | 9 | Exp 2 | 0.9 | 0.1 | 258.4 | 0.01 | 0.18 | -0.03 | 0.02 | -0.60 | -1.20 |
| 8969 | HIST1H2AG | 9 | Exp 2 | 1.3 | 0.3 | 300 | 0.06 | 0.15 | -0.07 | -0.02 | -0.43 | -0.94 |
| 128312 | HIST3H2BB | 9 | Exp 2 | 1.7 | 0.4 | 59.1 | 0.16 | 0.24 | 0.01 | 0.03 | -0.35 | -0.79 |
| 8364 | HIST1H4C | 9 | Exp 4 | 0.9 | 0.5 | 331.7 | 0.09 | 0.11 | -0.08 | -0.10 | -0.67 | -0.86 |
| 8356 | HIST1H3J | 9 | Exp 2 | 1.2 | 0.6 | 212.9 | 0.00 | 0.00 | -0.09 | -0.01 | -0.67 | -1.35 |
| 121504 | HIST4H4 | 9 | Poly 2 | 1.1 | 0.8 | 191.1 | 0.13 | 0.18 | 0.07 | -0.03 | -0.47 | -0.82 |
| 85236 | HIST1H2BK | 9 | Poly 2 | 0.8 | 0.8 | 275.9 | 0.08 | 0.15 | -0.03 | -0.07 | -0.59 | -1.05 |
| 440689 | HIST2H2BF | 9 | Exp 4 | 0.7 | 0.6 | 219.2 | 0.17 | 0.21 | -0.02 | -0.05 | -0.61 | -1.27 |
| 101929484 | LINC01615 | 9 | Linear | 1.2 | 0.3 | 22.9 | 0.01 | -0.05 | -0.13 | -0.06 | -0.29 | -0.89 |
| 8341 | HIST1H2BN | 9 | Exp 4 | 0.6 | 0.7 | 197.5 | 0.22 | 0.04 | -0.03 | -0.15 | -0.62 | -0.74 |
| 2938 | GSTA1 | 9 | Exp 2 | 1.6 | 0.8 | -14.8 | 0.00 | 0.15 | 0.05 | 0.08 | -0.43 | -0.78 |
| 101927642 | LINC01444 | 9 | Exp 2 | 1.6 | 0.7 | -44.2 | -0.04 | -0.17 | -0.17 | -0.12 | -0.46 | -0.81 |
| 2702 | GJA5 | 9 | Linear | 3.1 | 0.9 | 50.9 | 0.00 | 0.16 | 0.06 | 0.01 | -0.23 | -0.87 |
| 8339 | HIST1H2BG | 9 | Exp 2 | 1 | 0.3 | 289.9 | 0.15 | 0.17 | 0.00 | 0.01 | -0.56 | -1.18 |
| 8358 | HIST1H3B | 9 | Poly 2 | 0.7 | 0.5 | 331.6 | 0.05 | 0.04 | -0.08 | -0.04 | -0.80 | -1.21 |
| 8348 | HIST1H2BO | 9 | Poly 2 | 0.8 | 0.3 | 248.6 | 0.22 | 0.14 | -0.01 | 0.03 | -0.59 | -0.97 |
| 85235 | HIST1H2AH | 9 | Exp 2 | 1.1 | 0.5 | 263.9 | 0.10 | 0.15 | -0.02 | 0.02 | -0.58 | -1.29 |
| 8368 | HIST1H4L | 9 | Exp 2 | 1.6 | 0.2 | 226 | 0.18 | 0.29 | 0.05 | 0.05 | -0.28 | -0.82 |
| 8330 | HIST1H2AK | 9 | Exp 2 | 1.7 | 0.4 | 120.5 | 0.10 | 0.17 | -0.02 | 0.01 | -0.55 | -0.94 |
| 8354 | HIST1H3I | 9 | Exp 4 | 0.7 | 1 | 244.9 | 0.03 | 0.09 | -0.02 | -0.24 | -0.81 | -1.48 |
| 8350 | HIST1H3A | 9 | Poly 2 | 0.8 | 0.5 | 170.2 | 0.05 | 0.09 | -0.10 | -0.04 | -0.60 | -1.03 |
| 8331 | HIST1H2AJ | 9 | Linear | 2.1 | 0.5 | 127.6 | 0.01 | 0.18 | -0.06 | -0.02 | -0.32 | -1.05 |
| 8332 | HIST1H2AL | 9 | Poly 2 | 0.8 | 0.4 | 179 | -0.02 | 0.15 | -0.11 | -0.11 | -0.67 | -1.29 |
| 8367 | HIST1H4E | 9 | Exp 4 | 0.9 | 0.1 | 310.5 | 0.12 | 0.36 | 0.13 | -0.14 | -0.49 | -0.88 |
| 3012 | HIST1H2AE | 9 | Poly 2 | 0.7 | 0.3 | 255.1 | 0.07 | 0.14 | -0.03 | -0.01 | -0.68 | -1.30 |
| 8360 | HIST1H4D | 9 | Exp 2 | 1.6 | 0.2 | 208 | 0.12 | 0.13 | -0.09 | 0.00 | -0.52 | -1.00 |
| 8343 | HIST1H2BF | 9 | Exp 2 | 1.3 | 0.4 | 210.1 | -0.11 | 0.12 | -0.04 | -0.06 | -0.65 | -1.26 |
| 8335 | HIST1H2AB | 9 | Exp 2 | 1.5 | 0.4 | 190.3 | 0.03 | 0.14 | -0.08 | -0.02 | -0.62 | -1.27 |
| 8359 | HIST1H4A | 9 | Exp 2 | 1.9 | 0.7 | 155.3 | 0.25 | 0.08 | 0.09 | 0.00 | -0.61 | -0.96 |
| 8366 | HIST1H4B | 9 | Exp 2 | 2 | 0.6 | 293.4 | 0.12 | 0.13 | -0.01 | -0.02 | -0.69 | -1.04 |
| 8357 | HIST1H3H | 9 | Exp 2 | 1.4 | 0.5 | 282.7 | 0.14 | 0.11 | -0.04 | 0.02 | -0.68 | -1.19 |
| NA | NA | 10 | Exp 4 | 0.5 | 0 | -169.3 | -0.04 | 0.00 | 0.10 | 0.22 | 0.11 | 0.40 |
| 5166 | PDK4 | 10 | Exp 2 | 2.9 | 0.3 | -167.7 | 0.13 | 0.10 | 0.02 | 0.22 | 0.21 | 0.38 |
| 55200 | PLEKHG6 | 10 | Linear | 1.6 | 0.4 | -90.8 | -0.16 | -0.08 | -0.01 | 0.07 | 0.17 | 0.42 |
| 51513 | ETV7 | 10 | Exp 4 | 1.3 | 1 | -65.6 | 0.07 | 0.07 | 0.05 | 0.32 | 0.46 | 0.72 |
| 56920 | SEMA3G | 10 | Exp 2 | 2.2 | 0.5 | -64.9 | 0.17 | 0.13 | 0.20 | 0.04 | 0.27 | 0.72 |
| 58473 | PLEKHB1 | 10 | Linear | 1.9 | 0.8 | -83.3 | -0.07 | -0.03 | -0.05 | -0.11 | 0.21 | 0.48 |
| 55635 | DEPDC1 | 10 | Linear | 0.8 | 0.5 | 262.5 | -0.10 | -0.03 | -0.05 | 0.08 | 0.38 | 0.71 |
| 355 | FAS | 10 | Exp 2 | 0.9 | 0.9 | -10.7 | 0.00 | 0.00 | 0.06 | 0.15 | 0.19 | 0.94 |
| 286 | ANK1 | 10 | Linear | 2.4 | 0.5 | 14.1 | 0.12 | 0.05 | 0.25 | 0.06 | 0.24 | 0.47 |
| 23338 | JADE2 | 10 | Linear | 1.5 | 0.9 | 136.8 | 0.05 | 0.10 | 0.08 | 0.11 | 0.42 | 0.70 |
| 56204 | FAM214A | 10 | Exp 2 | 1.2 | 1 | 109.9 | -0.05 | -0.05 | 0.07 | 0.05 | 0.28 | 0.72 |
| 50484 | RRM2B | 10 | Linear | 0.7 | 0.6 | 183.6 | -0.10 | -0.03 | -0.02 | 0.05 | 0.36 | 0.70 |
| 9498 | SLC4A8 | 10 | Linear | 1.1 | 0.8 | 1.8 | -0.13 | -0.13 | -0.03 | 0.02 | 0.29 | 0.58 |
| 26999 | CYFIP2 | 10 | Exp 2 | 0.8 | 0.7 | -18.1 | 0.11 | 0.10 | 0.15 | 0.27 | 0.51 | 1.47 |
| 55283 | MCOLN3 | 10 | Exp 2 | 1.7 | 0.5 | -22.6 | -0.11 | 0.03 | 0.07 | -0.04 | 0.12 | 0.46 |
| 1001 | CDH3 | 10 | Linear | 3.1 | 1 | 44.6 | 0.11 | 0.04 | 0.00 | 0.12 | 0.23 | 0.47 |
| 53340 | SPA17 | 10 | Linear | 1.4 | 0.6 | 25.3 | 0.08 | 0.07 | -0.01 | 0.11 | 0.32 | 0.50 |
| 10347 | ABCA7 | 10 | Linear | 1.5 | 0.8 | 58.4 | -0.11 | -0.09 | -0.06 | -0.02 | 0.26 | 0.58 |
| 9423 | NTN1 | 10 | Linear | 1.3 | 0.1 | -136 | -0.19 | -0.14 | -0.10 | -0.22 | 0.18 | 0.50 |
| 375449 | MAST4 | 10 | Exp 2 | 2 | 0.2 | 11.2 | 0.19 | 0.02 | 0.19 | 0.05 | 0.18 | 0.72 |
| 23285 | KIAA1107 | 10 | Exp 2 | 1.7 | 0.7 | -27.5 | 0.09 | 0.06 | 0.02 | 0.13 | 0.22 | 0.62 |
| 3161 | HMMR | 10 | Linear | 0.6 | 0.1 | 273.5 | -0.17 | -0.06 | -0.09 | 0.13 | 0.50 | 0.98 |
| 80216 | ALPK1 | 10 | Exp 2 | 1 | 0.8 | 136.9 | -0.02 | -0.03 | -0.02 | 0.09 | 0.23 | 0.68 |
| 1183 | CLCN4 | 10 | Exp 2 | 1.2 | 0.6 | 24.1 | 0.05 | 0.03 | 0.12 | 0.13 | 0.17 | 0.58 |
| 8786 | RGS11 | 10 | Power | 4.8 | 0.2 | -97.8 | 0.08 | 0.00 | 0.19 | 0.11 | 0.04 | 0.40 |
| 56605 | ERO1B | 10 | Linear | 1.3 | 0.5 | 19 | -0.09 | -0.12 | -0.06 | -0.05 | 0.28 | 0.47 |
| 6790 | AURKA | 10 | Exp 2 | 1.1 | 0.5 | 241.2 | -0.06 | -0.05 | -0.07 | 0.10 | 0.25 | 0.66 |
| 8544 | PIR | 10 | Linear | 1.5 | 0.5 | 1.2 | -0.03 | 0.06 | 0.14 | 0.13 | 0.28 | 0.48 |
| 55287 | TMEM40 | 10 | Linear | 3 | 1 | 25.3 | 0.04 | -0.05 | 0.05 | 0.06 | 0.17 | 0.52 |
| 5027 | P2RX7 | 10 | Linear | 1.1 | 0.5 | -75.1 | 0.05 | 0.04 | -0.08 | 0.10 | 0.22 | 0.55 |
| 29965 | CDIP1 | 10 | Poly 2 | 3.3 | 0.2 | -6.6 | 0.22 | -0.01 | 0.12 | 0.04 | 0.13 | 0.59 |
| 83719 | YPEL3 | 10 | Poly 2 | 3.6 | 0.2 | 23.3 | 0.08 | 0.01 | -0.03 | -0.08 | 0.06 | 0.67 |
| 55632 | G2E3 | 10 | Linear | 1.3 | 0.9 | 244.5 | -0.09 | -0.01 | -0.01 | -0.02 | 0.35 | 0.64 |
| 1299 | COL9A3 | 10 | Linear | 1.1 | 0.6 | -45.5 | -0.09 | -0.16 | 0.02 | 0.06 | 0.23 | 0.72 |
| 54209 | TREM2 | 10 | Exp 2 | 2.7 | 0.8 | -196.2 | 0.04 | -0.09 | -0.01 | -0.02 | 0.06 | 0.44 |
| 4320 | MMP11 | 10 | Linear | 2.5 | 0.9 | 16.6 | -0.13 | -0.11 | 0.00 | 0.06 | 0.09 | 0.46 |
| 29799 | YPEL1 | 10 | Exp 2 | 1.3 | 1 | 59.7 | -0.06 | -0.07 | -0.04 | -0.02 | 0.29 | 0.84 |
| 113791 | PIK3IP1 | 10 | Linear | 2.4 | 0.3 | -63.8 | -0.07 | 0.10 | 0.11 | 0.03 | 0.12 | 0.39 |
| 23492 | CBX7 | 10 | Exp 2 | 2.6 | 0.6 | 45.2 | -0.03 | -0.06 | 0.03 | -0.26 | 0.04 | 0.49 |
| 1033 | CDKN3 | 10 | Linear | 0.8 | 0.7 | 170.8 | -0.03 | 0.03 | 0.00 | 0.12 | 0.35 | 0.61 |
| 9751 | SNPH | 10 | Exp 3 | 3.8 | 0.8 | -4.8 | 0.02 | 0.02 | 0.04 | 0.05 | 0.01 | 0.49 |
| 50855 | PARD6A | 10 | Linear | 2.2 | 0.8 | 25.9 | 0.12 | 0.01 | 0.09 | 0.24 | 0.14 | 0.65 |
| 23475 | QPRT | 10 | Linear | 1.2 | 1 | 15.1 | -0.01 | 0.03 | 0.04 | 0.02 | 0.24 | 0.60 |
| 29108 | PYCARD | 10 | Linear | 2.1 | 0.5 | -67.9 | 0.04 | 0.11 | 0.20 | 0.13 | 0.27 | 0.42 |
| 50804 | MYEF2 | 10 | Exp 2 | 1.8 | 0.5 | 214.5 | -0.02 | 0.15 | 0.19 | -0.05 | 0.50 | 0.96 |
| 8797 | TNFRSF10A | 10 | Exp 4 | 0.4 | 0.2 | -9.2 | 0.10 | 0.13 | 0.09 | 0.26 | 0.55 | 0.76 |
| 2217 | FCGRT | 10 | Linear | 1.3 | 0.9 | 120.3 | -0.06 | -0.09 | -0.06 | 0.06 | 0.22 | 0.58 |
| 57664 | PLEKHA4 | 10 | Exp 2 | 3.1 | 0.8 | 118.3 | 0.06 | 0.26 | 0.22 | 0.01 | 0.35 | 0.55 |
| 5143;729966 | PDE4C;LOC729966 | 10 | Poly 3 | 1.5 | 0.4 | -97.4 | -0.09 | -0.17 | -0.14 | -0.19 | 0.35 | 0.96 |
| 5294 | PIK3CG | 10 | Linear | 1.8 | 0.8 | -68.3 | 0.06 | -0.01 | 0.05 | 0.22 | 0.30 | 0.54 |
| 64081 | PBLD | 10 | Exp 2 | 1.5 | 0.8 | 1.7 | 0.05 | 0.11 | 0.03 | 0.15 | 0.21 | 0.55 |
| 79132 | DHX58 | 10 | Exp 2 | 2.3 | 0.4 | -22 | 0.00 | 0.16 | -0.04 | 0.00 | 0.16 | 0.46 |
| 374 | AREG | 10 | Linear | 0.3 | 0.3 | -24.7 | -0.01 | 0.16 | 0.10 | 0.33 | 0.87 | 1.64 |
| 54682 | MANSC1 | 10 | Power | 3.2 | 0.4 | 61.4 | 0.07 | -0.21 | -0.15 | -0.18 | 0.10 | 0.71 |
| 10112 | KIF20A | 10 | Linear | 0.9 | 0.7 | 293.6 | -0.05 | -0.05 | -0.06 | 0.10 | 0.30 | 0.66 |
| 80325 | ABTB1 | 10 | Exp 2 | 3 | 0.9 | 35.4 | -0.16 | -0.09 | 0.12 | -0.14 | 0.07 | 0.51 |
| 57501 | KIAA1257 | 10 | Power | 4.9 | 0.4 | -197.2 | 0.18 | 0.14 | 0.07 | 0.17 | 0.25 | 0.46 |
| 54800 | KLHL24 | 10 | Exp 2 | 1.7 | 1 | 128.8 | -0.11 | -0.09 | -0.01 | -0.01 | 0.31 | 0.71 |
| 9540 | TP53I3 | 10 | Linear | 1.3 | 0.2 | 149.7 | -0.08 | -0.01 | -0.09 | 0.08 | 0.21 | 0.57 |
| 9381 | OTOF | 10 | Linear | 0.9 | 0.8 | -94.1 | 0.05 | -0.02 | 0.14 | 0.08 | 0.09 | 0.81 |
| 84812 | PLCD4 | 10 | Linear | 1 | 0.8 | -62.5 | 0.01 | 0.11 | 0.03 | 0.08 | 0.28 | 0.64 |
| 57535 | KIAA1324 | 10 | Exp 2 | 1.9 | 0.5 | -41.4 | 0.16 | 0.03 | 0.05 | 0.14 | 0.21 | 0.57 |
| 8503 | PIK3R3 | 10 | Exp 2 | 1.3 | 0.6 | 59.2 | 0.00 | -0.16 | 0.04 | 0.03 | 0.27 | 0.99 |
| 4751 | NEK2 | 10 | Linear | 0.9 | 0.6 | 209.5 | -0.08 | -0.05 | -0.08 | 0.09 | 0.36 | 0.71 |
| 1063 | CENPF | 10 | Linear | 1.4 | 0.8 | 340.2 | -0.14 | 0.00 | 0.00 | 0.03 | 0.33 | 0.62 |
| 9928 | KIF14 | 10 | Linear | 0.8 | 0.9 | 242.1 | -0.09 | -0.03 | -0.02 | 0.07 | 0.32 | 0.65 |
| 79630 | C1orf54 | 10 | Exp 5 | 1.2 | 0.1 | -45.7 | -0.13 | -0.15 | -0.10 | -0.02 | 0.32 | 0.44 |
| 5493 | PPL | 10 | Linear | 1.7 | 0.7 | -28.4 | 0.23 | 0.08 | 0.04 | 0.14 | 0.39 | 0.75 |
| 11064 | CNTRL | 10 | Linear | 0.9 | 0.9 | 149.6 | -0.08 | -0.01 | 0.00 | 0.03 | 0.29 | 0.60 |
| 8013 | NR4A3 | 10 | Exp 2 | 2.6 | 0 | -24.8 | 0.23 | -0.05 | 0.22 | -0.08 | 0.11 | 0.57 |
| 57862 | ZNF410 | 10 | Exp 2 | 2.8 | 0.5 | -31.7 | 0.07 | -0.07 | 0.12 | -0.04 | 0.10 | 0.39 |
| 84795 | PYROXD2 | 10 | Exp 2 | 1.9 | 0.1 | -41.6 | 0.15 | -0.03 | 0.02 | 0.10 | 0.19 | 0.41 |
| 3164 | NR4A1 | 10 | Exp 2 | 3.8 | 0.4 | 86.4 | 0.24 | 0.02 | 0.24 | -0.02 | 0.28 | 0.53 |
| 9111 | NMI | 10 | Linear | 1.3 | 0.8 | 14 | -0.09 | 0.00 | -0.05 | 0.09 | 0.21 | 0.50 |
| 10608 | MXD4 | 10 | Exp 2 | 1.3 | 1 | 157.5 | 0.10 | 0.02 | 0.04 | 0.04 | 0.30 | 0.80 |
| 1026 | CDKN1A | 10 | Poly 2 | 0.5 | 0.8 | 162.3 | 0.11 | 0.02 | 0.15 | 0.29 | 0.91 | 1.97 |
| 2537 | IFI6 | 10 | Linear | 1.3 | 0.7 | 46.1 | 0.06 | -0.03 | -0.05 | 0.07 | 0.25 | 0.56 |
| 64753 | CCDC136 | 10 | Exp 2 | 2 | 0.8 | -5.7 | 0.07 | 0.07 | 0.14 | 0.04 | 0.19 | 0.47 |
| 3663 | IRF5 | 10 | Exp 2 | 2.3 | 0.7 | -17.5 | 0.00 | 0.05 | 0.16 | 0.01 | 0.18 | 0.47 |
| 55930 | MYO5C | 10 | Exp 2 | 2.3 | 1 | 147.9 | -0.01 | 0.07 | 0.16 | 0.10 | 0.27 | 0.67 |
| 54478 | FAM64A | 10 | Exp 2 | 1.5 | 0.1 | 214.3 | -0.02 | 0.00 | -0.04 | 0.15 | 0.15 | 0.59 |
| 684 | BST2 | 10 | Linear | 2.2 | 0.6 | -69.2 | -0.05 | 0.16 | 0.04 | 0.09 | 0.28 | 0.47 |
| 23025 | UNC13A | 10 | Linear | 0.8 | 0.2 | -139.8 | -0.11 | -0.15 | 0.01 | -0.11 | 0.35 | 0.76 |
| 9518 | GDF15 | 10 | Exp 2 | 0.9 | 0.7 | 8.6 | 0.05 | 0.03 | 0.08 | 0.01 | 0.56 | 1.42 |
| 54858 | PGPEP1 | 10 | Linear | 0.9 | 0.3 | 41.9 | -0.19 | -0.02 | 0.00 | 0.04 | 0.40 | 0.76 |
| 27293 | SMPDL3B | 10 | Exp 2 | 2.3 | 0.8 | -4.4 | 0.03 | 0.05 | -0.02 | -0.04 | 0.10 | 0.53 |
| 7153 | TOP2A | 10 | Exp 2 | 1 | 0.4 | 394.8 | -0.09 | -0.08 | -0.08 | 0.03 | 0.19 | 0.60 |
| 10346 | TRIM22 | 10 | Linear | 0.7 | 0.1 | -9.5 | -0.19 | -0.15 | -0.17 | -0.01 | 0.29 | 0.74 |
| 3691 | ITGB4 | 10 | Exp 2 | 4.1 | 1 | 85.8 | 0.13 | 0.06 | 0.15 | 0.03 | 0.18 | 0.61 |
| 55065 | SLC52A1 | 10 | Exp 2 | 2.3 | 0.3 | -177.6 | -0.02 | 0.02 | -0.01 | -0.17 | 0.10 | 0.49 |
| 51308 | REEP2 | 10 | Linear | 0.9 | 0.9 | 135.7 | 0.01 | -0.02 | 0.11 | 0.14 | 0.37 | 0.73 |
| 63926 | ANKEF1 | 10 | Linear | 1.3 | 0.7 | -71.9 | 0.02 | 0.03 | 0.02 | 0.15 | 0.25 | 0.61 |
| 64900 | LPIN3 | 10 | Exp 2 | 1.8 | 0.8 | -31.3 | 0.08 | 0.12 | 0.17 | 0.04 | 0.27 | 0.72 |
| 93611 | FBXO44 | 10 | Exp 2 | 2.1 | 0.9 | 23.1 | 0.06 | -0.07 | 0.08 | 0.02 | 0.22 | 0.54 |
| 8900 | CCNA1 | 10 | Linear | 1.4 | 0 | -62.5 | 0.16 | 0.17 | 0.22 | 0.33 | 0.33 | 0.60 |
| 891 | CCNB1 | 10 | Linear | 1.4 | 0.2 | 335.1 | -0.07 | -0.08 | -0.08 | 0.14 | 0.24 | 0.62 |
| 84900 | RNFT2 | 10 | Exp 2 | 1.9 | 0.8 | 117.6 | 0.23 | 0.05 | 0.06 | 0.02 | 0.26 | 0.83 |
| 27165 | GLS2 | 10 | Exp 2 | 0.9 | 0.1 | -75.6 | -0.11 | -0.14 | 0.13 | -0.01 | 0.30 | 1.02 |
| 116986 | AGAP2 | 10 | Poly 2 | 3.5 | 0.6 | 18 | 0.08 | -0.08 | 0.09 | -0.07 | 0.00 | 0.49 |
| 4193 | MDM2 | 10 | Exp 2 | 0.6 | 0.9 | 238.9 | -0.01 | -0.04 | 0.03 | 0.03 | 0.40 | 1.01 |
| 6041 | RNASEL | 10 | Linear | 1.7 | 0.8 | -23.9 | -0.01 | 0.06 | -0.01 | 0.09 | 0.22 | 0.46 |
| 10154 | PLXNC1 | 10 | Exp 2 | 2 | 0.2 | -32 | -0.19 | 0.04 | -0.03 | 0.13 | 0.09 | 0.48 |
| 84073 | MYCBPAP | 10 | Exp 2 | 2.6 | 0.1 | -105.3 | 0.10 | 0.02 | 0.05 | 0.04 | -0.03 | 0.38 |
| 23452 | ANGPTL2 | 10 | Exp 2 | 2.5 | 0.5 | -103.1 | 0.20 | 0.03 | 0.13 | 0.14 | 0.19 | 0.54 |
| 51754 | TMEM8B | 10 | Exp 2 | 3.1 | 0.7 | 5.8 | 0.09 | -0.06 | 0.01 | -0.02 | 0.04 | 0.43 |
| 11131 | CAPN11 | 10 | Power | 4.7 | 0.7 | -199.5 | 0.06 | 0.00 | -0.03 | 0.07 | 0.08 | 0.44 |
| 2644 | GCHFR | 10 | Linear | 2.1 | 0.9 | 40.5 | 0.03 | -0.01 | 0.07 | 0.12 | 0.24 | 0.49 |
| 9635 | CLCA2 | 10 | Linear | 0.9 | 0.7 | -74.4 | 0.06 | -0.01 | -0.02 | 0.14 | 0.49 | 0.99 |
| 53836 | GPR87 | 10 | Linear | 0.5 | 0.7 | -101.7 | -0.09 | -0.06 | 0.00 | 0.06 | 0.34 | 0.85 |
| 90525 | SHF | 10 | Linear | 1.5 | 0.9 | 27.3 | 0.02 | -0.02 | 0.09 | 0.08 | 0.19 | 0.51 |
| 64579 | NDST4 | 10 | Power | 4.8 | 0.6 | -71 | 0.01 | 0.02 | 0.01 | 0.16 | -0.06 | 0.40 |
| 1950 | EGF | 10 | Poly 2 | 0.4 | 0.3 | 124.5 | -0.12 | -0.03 | 0.03 | 0.20 | 0.59 | 0.88 |
| 9746 | CLSTN3 | 10 | Exp 2 | 2.2 | 0.9 | 141.8 | 0.08 | 0.14 | 0.06 | -0.02 | 0.23 | 0.66 |
| 283431 | GAS2L3 | 10 | Linear | 1 | 0.5 | 205.2 | -0.06 | 0.02 | -0.04 | -0.01 | 0.31 | 0.59 |
| 90634 | N4BP2L1 | 10 | Linear | 1.5 | 0.6 | -41.1 | -0.11 | -0.15 | -0.12 | 0.05 | 0.11 | 0.47 |
| 10140 | TOB1 | 10 | Exp 2 | 2.6 | 0 | 131.1 | -0.03 | -0.05 | 0.01 | -0.19 | 0.25 | 0.60 |
| 54828 | BCAS3 | 10 | Exp 2 | 0.8 | 0.4 | 66.6 | 0.04 | 0.01 | 0.03 | -0.01 | 0.30 | 0.76 |
| 6398 | SECTM1 | 10 | Poly 2 | 3.3 | 0.9 | -111.2 | -0.01 | 0.02 | -0.07 | -0.12 | -0.12 | 0.48 |
| 85452 | CFAP74 | 10 | Exp 2 | 2.9 | 0 | -177.9 | 0.00 | 0.29 | 0.11 | 0.03 | 0.23 | 0.50 |
| 51702 | PADI3 | 10 | Exp 2 | 2.2 | 0.3 | -138.8 | 0.10 | -0.15 | -0.03 | -0.04 | 0.06 | 0.67 |
| 126969 | SLC44A3 | 10 | Linear | 1.5 | 0.6 | -49.7 | 0.00 | 0.11 | 0.14 | 0.11 | 0.38 | 0.57 |
| 81607 | NECTIN4 | 10 | Linear | 0.5 | 0.4 | -24.9 | -0.06 | 0.07 | 0.22 | 0.15 | 0.48 | 1.27 |
| 26154 | ABCA12 | 10 | Linear | 1 | 0.2 | -150 | 0.16 | 0.18 | 0.11 | 0.38 | 0.34 | 0.79 |
| 29114 | TAGLN3 | 10 | Power | 4.7 | 0.3 | -114 | 0.00 | 0.15 | 0.09 | 0.05 | 0.00 | 0.45 |
| 26249 | KLHL3 | 10 | Exp 2 | 2.2 | 0.3 | -52.6 | 0.08 | -0.10 | 0.05 | 0.00 | 0.17 | 0.46 |
| 222663 | SCUBE3 | 10 | Linear | 2.1 | 0.7 | -44 | 0.11 | 0.06 | 0.08 | -0.03 | 0.28 | 0.46 |
| 154091 | SLC2A12 | 10 | Linear | 2 | 0.8 | -32.6 | 0.04 | -0.05 | -0.10 | 0.08 | 0.23 | 0.49 |
| 256158 | HMCN2 | 10 | Linear | 1.9 | 0.3 | -189 | 0.03 | 0.10 | 0.09 | 0.24 | 0.20 | 0.43 |
| 143686 | SESN3 | 10 | Exp 2 | 2.3 | 0.9 | -6 | 0.01 | -0.01 | -0.01 | 0.04 | 0.28 | 0.71 |
| 7108 | TM7SF2 | 10 | Exp 2 | 1.6 | 1 | 73 | 0.14 | 0.11 | 0.14 | -0.03 | 0.27 | 0.86 |
| 341640 | FREM2 | 10 | Linear | 2 | 0 | -55.8 | 0.02 | 0.08 | 0.17 | -0.06 | 0.32 | 0.39 |
| 3140 | MR1 | 10 | Linear | 0.8 | 0.6 | 108.8 | -0.07 | -0.05 | -0.08 | 0.08 | 0.27 | 0.68 |
| 10461 | MERTK | 10 | Exp 2 | 1.1 | 0.1 | -54.6 | 0.06 | -0.06 | -0.03 | 0.09 | 0.18 | 0.55 |
| 26256 | CABYR | 10 | Poly 2 | 2.6 | 0.5 | 52.8 | 0.06 | -0.05 | -0.10 | -0.08 | 0.11 | 0.70 |
| 118491 | CFAP70 | 10 | Exp 2 | 1.7 | 0.2 | -70.5 | -0.10 | -0.12 | -0.17 | 0.03 | 0.16 | 0.55 |
| 7079 | TIMP4 | 10 | Linear | 1.4 | 0.7 | -12.7 | -0.04 | -0.04 | -0.10 | 0.06 | 0.23 | 0.53 |
| 9133 | CCNB2 | 10 | Exp 2 | 0.9 | 0.4 | 273.1 | -0.05 | -0.03 | -0.05 | 0.10 | 0.22 | 0.70 |
| 57822 | GRHL3 | 10 | Linear | 1.1 | 0.2 | -121.4 | 0.02 | -0.14 | 0.14 | 0.06 | 0.25 | 0.57 |
| 114822 | RHPN1 | 10 | Exp 2 | 2.2 | 1 | -1.2 | 0.03 | 0.01 | 0.03 | 0.01 | 0.07 | 0.52 |
| 995 | CDC25C | 10 | Exp 2 | 1.4 | 0.1 | 157.4 | -0.14 | -0.06 | -0.12 | 0.07 | 0.16 | 0.59 |
| 340348 | TSPAN33 | 10 | Linear | 1.2 | 0.8 | -48.9 | -0.05 | -0.08 | -0.06 | 0.02 | 0.20 | 0.47 |
| 2039 | DMTN | 10 | Exp 2 | 3.8 | 0.8 | 82.2 | 0.24 | -0.01 | 0.11 | -0.04 | 0.00 | 0.56 |
| 149473 | CCDC24 | 10 | Exp 2 | 2.4 | 0.9 | 21.6 | 0.15 | 0.07 | 0.11 | 0.07 | 0.17 | 0.48 |
| 201176 | ARHGAP27 | 10 | Exp 2 | 1.7 | 0.8 | 51.4 | 0.09 | -0.06 | 0.03 | 0.03 | 0.20 | 0.63 |
| 7832 | BTG2 | 10 | Poly 2 | 2.3 | 0.8 | 32.4 | 0.07 | -0.04 | 0.04 | -0.06 | 0.28 | 1.26 |
| 57732 | ZFYVE28 | 10 | Exp 2 | 3.6 | 0.9 | -64.6 | 0.05 | 0.02 | 0.18 | 0.10 | 0.17 | 0.39 |
| 84814 | PLPP7 | 10 | Exp 5 | 1.9 | 0 | -62.5 | -0.06 | -0.18 | -0.14 | -0.10 | 0.27 | 0.54 |
| 2905 | GRIN2C | 10 | Exp 5 | 1.8 | 0.2 | -169.3 | 0.08 | 0.06 | 0.07 | 0.03 | 0.41 | 0.47 |
| 2232 | FDXR | 10 | Exp 2 | 1.1 | 0.8 | 102 | 0.00 | 0.04 | 0.02 | 0.15 | 0.33 | 1.00 |
| 117283 | IP6K3 | 10 | Exp 2 | 1.2 | 0.2 | -85.6 | -0.10 | -0.15 | 0.06 | 0.03 | 0.32 | 0.89 |
| 283130 | SLC25A45 | 10 | Exp 2 | 2.7 | 0.9 | -54.4 | 0.01 | -0.04 | 0.08 | -0.02 | 0.06 | 0.40 |
| 3699 | ITIH3 | 10 | Linear | 2.1 | 0.8 | -110.1 | -0.03 | 0.05 | 0.14 | 0.06 | 0.25 | 0.39 |
| 374946 | DRAXIN | 10 | Exp 5 | 1.8 | 0.2 | -102.7 | 0.13 | 0.01 | 0.15 | 0.02 | 0.54 | 1.12 |
| 126820 | WDR63 | 10 | Exp 2 | 2 | 0.3 | -128.8 | 0.01 | 0.03 | 0.01 | -0.01 | 0.14 | 0.64 |
| 126823 | KLHDC9 | 10 | Exp 2 | 1.7 | 0.5 | -104.1 | 0.05 | -0.01 | -0.07 | 0.07 | 0.07 | 0.51 |
| 57326 | PBXIP1 | 10 | Exp 2 | 2.1 | 0.5 | 176.1 | 0.18 | 0.22 | 0.16 | 0.10 | 0.34 | 0.71 |
| 92691 | TMEM169 | 10 | Linear | 1.5 | 0.8 | 34.8 | 0.05 | 0.02 | 0.05 | 0.18 | 0.33 | 0.54 |
| 5274 | SERPINI1 | 10 | Linear | 1.9 | 0.6 | 42.3 | 0.03 | 0.02 | 0.02 | 0.22 | 0.36 | 0.51 |
| 201895 | SMIM14 | 10 | Linear | 1 | 0.5 | 131.3 | -0.10 | -0.01 | -0.02 | 0.02 | 0.44 | 0.63 |
| 54502 | RBM47 | 10 | Linear | 1.2 | 0.3 | -41.2 | 0.17 | 0.01 | 0.05 | 0.20 | 0.36 | 0.71 |
| 339965 | CCDC158 | 10 | Exp 2 | 2.5 | 0.4 | -76.5 | -0.11 | 0.10 | 0.04 | -0.03 | 0.14 | 0.41 |
| 134147 | CMBL | 10 | Exp 2 | 1.7 | 1 | -30.1 | -0.10 | -0.01 | 0.02 | 0.05 | 0.20 | 0.60 |
| 7098 | TLR3 | 10 | Exp 2 | 2.1 | 0.2 | -17.3 | 0.07 | -0.10 | 0.00 | -0.07 | 0.17 | 0.46 |
| 9232 | PTTG1 | 10 | Linear | 1.2 | 0.2 | 255.9 | -0.05 | 0.06 | -0.07 | 0.16 | 0.31 | 0.64 |
| 94241 | TP53INP1 | 10 | Exp 2 | 0.8 | 0.5 | 127.6 | 0.00 | -0.03 | 0.10 | 0.01 | 0.67 | 1.54 |
| 80318 | GKAP1 | 10 | Linear | 1.9 | 0.9 | 14.5 | -0.05 | 0.05 | -0.01 | 0.03 | 0.25 | 0.52 |
| 360 | AQP3 | 10 | Linear | 1.6 | 0.6 | -2 | -0.10 | -0.21 | -0.10 | -0.08 | 0.14 | 0.49 |
| 118471 | PRAP1 | 10 | Exp 2 | 2.1 | 0.7 | -178.4 | -0.10 | -0.04 | -0.05 | 0.04 | 0.03 | 0.45 |
| 53349 | ZFYVE1 | 10 | Exp 3 | 3.6 | 0.6 | 126.1 | 0.15 | -0.02 | 0.06 | 0.06 | 0.06 | 0.61 |
| 6692 | SPINT1 | 10 | Exp 2 | 2.4 | 0.9 | 93.7 | 0.17 | 0.02 | 0.12 | 0.18 | 0.15 | 0.68 |
| 6609 | SMPD1 | 10 | Exp 2 | 2.2 | 0.7 | 83.4 | 0.20 | 0.04 | 0.14 | 0.08 | 0.19 | 0.62 |
| 6236 | RRAD | 10 | Linear | 0.8 | 1 | -17.2 | 0.03 | 0.14 | 0.04 | 0.13 | 0.53 | 1.14 |
| 348094 | ANKDD1A | 10 | Linear | 1.3 | 0.9 | -55.1 | -0.03 | 0.03 | 0.00 | 0.08 | 0.11 | 0.40 |
| 201191 | SAMD14 | 10 | Linear | 2.7 | 0.5 | -31.7 | -0.04 | 0.00 | 0.03 | -0.18 | 0.20 | 0.41 |
| 80221 | ACSF2 | 10 | Linear | 0.7 | 0.9 | 124 | 0.00 | 0.05 | 0.02 | 0.10 | 0.34 | 0.77 |
| 10653 | SPINT2 | 10 | Exp 4 | 0.8 | 0.6 | 26.9 | -0.09 | -0.03 | -0.08 | 0.15 | 0.36 | 0.60 |
| 10501 | SEMA6B | 10 | Exp 2 | 3.4 | 0.9 | -7.9 | 0.11 | 0.09 | 0.02 | 0.07 | 0.16 | 0.41 |
| 283987 | HID1 | 10 | Exp 2 | 1.5 | 0.7 | 0.6 | 0.02 | -0.06 | 0.01 | 0.03 | 0.12 | 0.71 |
| 27065 | NSG1 | 10 | Linear | 1.3 | 0.3 | -136.1 | -0.08 | 0.00 | 0.11 | 0.00 | 0.27 | 0.56 |
| 10791 | VAMP5 | 10 | Exp 2 | 3.2 | 0.4 | -12.4 | 0.13 | 0.04 | 0.15 | -0.01 | 0.02 | 0.43 |
| 3635 | INPP5D | 10 | Exp 2 | 1.2 | 0.4 | -63.8 | 0.07 | -0.03 | 0.05 | -0.07 | 0.39 | 1.21 |
| 9022 | CLIC3 | 10 | Linear | 1.9 | 0.7 | 68.9 | -0.03 | -0.07 | 0.09 | 0.18 | 0.28 | 0.57 |
| 10887;200558 | PROKR1;APLF | 10 | Exp 2 | 2.2 | 0.8 | 14.2 | 0.05 | 0.13 | 0.06 | 0.13 | 0.22 | 0.48 |
| 22871 | NLGN1 | 10 | Linear | 0.9 | 0.9 | 63.2 | 0.04 | -0.02 | 0.06 | 0.06 | 0.38 | 0.70 |
| 10826 | FAXDC2 | 10 | Exp 2 | 2.2 | 1 | 33.9 | 0.07 | 0.03 | 0.04 | 0.09 | 0.22 | 0.67 |
| 23204 | ARL6IP1 | 10 | Linear | 0.7 | 0.4 | 318.9 | -0.13 | -0.07 | -0.02 | 0.08 | 0.36 | 0.75 |
| 5272 | SERPINB9 | 10 | Exp 2 | 2.2 | 0.7 | 127.2 | 0.11 | -0.09 | 0.00 | 0.05 | 0.26 | 0.61 |
| 55561 | CDC42BPG | 10 | Linear | 1.8 | 0.1 | -53.3 | 0.07 | 0.01 | 0.06 | 0.06 | 0.18 | 0.47 |
| 116844 | LRG1 | 10 | Exp 2 | 2.8 | 0.8 | -165.1 | -0.02 | -0.07 | -0.02 | 0.06 | 0.04 | 0.39 |
| 57571 | CARNS1 | 10 | Exp 2 | 1.9 | 0.3 | -93 | -0.09 | -0.11 | -0.15 | -0.09 | 0.03 | 0.42 |
| 111 | ADCY5 | 10 | Linear | 1.1 | 0.2 | -119.5 | 0.12 | 0.02 | 0.08 | 0.24 | 0.28 | 0.65 |
| 8794;254896 | TNFRSF10C;LOC254896 | 10 | Linear | 2 | 0.3 | -53.8 | 0.08 | 0.07 | -0.04 | 0.07 | 0.15 | 0.40 |
| 9001 | HAP1 | 10 | Exp 2 | 1.8 | 0.4 | -23.8 | 0.07 | -0.02 | 0.04 | -0.12 | 0.08 | 0.61 |
| 84984 | CEP19 | 10 | Exp 4 | 0.6 | 0.7 | 22.6 | 0.04 | 0.08 | 0.04 | 0.16 | 0.45 | 0.50 |
| 7096 | TLR1 | 10 | Exp 2 | 2.3 | 0.9 | 47.4 | -0.02 | -0.14 | -0.05 | 0.05 | 0.04 | 0.51 |
| 388403 | YPEL2 | 10 | Linear | 1.2 | 0.9 | 40.8 | -0.06 | 0.01 | 0.02 | 0.03 | 0.36 | 0.67 |
| 9537 | TP53I11 | 10 | Poly 2 | 3.9 | 0.6 | -135 | 0.09 | -0.07 | 0.14 | -0.14 | -0.02 | 0.48 |
| 196996 | GRAMD2 | 10 | Exp 2 | 2.1 | 0.5 | -77.5 | 0.04 | 0.08 | -0.05 | 0.02 | 0.10 | 0.42 |
| 2810 | SFN | 10 | Linear | 1.9 | 0.1 | -72.8 | 0.24 | 0.03 | 0.19 | 0.14 | 0.38 | 0.54 |
| 285489 | DOK7 | 10 | Linear | 2.9 | 1 | 37.6 | -0.03 | -0.02 | 0.02 | 0.10 | 0.18 | 0.49 |
| 93129 | ORAI3 | 10 | Linear | 1.8 | 0.9 | -25.7 | 0.02 | -0.07 | 0.09 | 0.08 | 0.17 | 0.48 |
| 414149 | ACBD7 | 10 | Linear | 0.9 | 0.7 | 43.2 | 0.01 | -0.08 | -0.07 | 0.10 | 0.58 | 0.90 |
| 340485 | ACER2 | 10 | Exp 2 | 1.7 | 0.3 | -72.4 | 0.10 | -0.09 | -0.01 | 0.10 | 0.18 | 0.63 |
| 100049716 | LOC100049716 | 10 | Hill | 0.7 | 0.2 | 2.2 | -0.17 | -0.04 | 0.05 | 0.03 | 0.29 | 0.50 |
| 203111 | ERICH5 | 10 | Linear | 1.3 | 0.9 | 9.2 | 0.01 | 0.09 | 0.12 | 0.16 | 0.34 | 0.69 |
| 259173 | ALS2CL | 10 | Linear | 1.5 | 0.9 | -24.9 | 0.17 | 0.06 | 0.11 | 0.07 | 0.47 | 0.68 |
| 79962 | DNAJC22 | 10 | Linear | 1.3 | 0.7 | 119.3 | -0.06 | 0.00 | 0.01 | 0.15 | 0.35 | 0.60 |
| 84875 | PARP10 | 10 | Exp 2 | 2.4 | 0.8 | 62.7 | 0.05 | 0.02 | 0.06 | 0.09 | 0.23 | 0.55 |
| 81575 | APOLD1 | 10 | Linear | 0.7 | 0.9 | 95.2 | -0.08 | 0.01 | 0.00 | 0.11 | 0.31 | 0.61 |
| 79730 | NSUN7 | 10 | Linear | 1.8 | 0.8 | -23.8 | -0.03 | -0.07 | -0.08 | -0.06 | 0.25 | 0.52 |
| 284129 | SLC26A11 | 10 | Exp 2 | 2.3 | 0.6 | 46.4 | 0.17 | 0.05 | 0.08 | 0.03 | 0.16 | 0.60 |
| 57463 | AMIGO1 | 10 | Poly 2 | 3.1 | 0.1 | -12 | 0.13 | -0.12 | -0.04 | 0.02 | 0.08 | 0.47 |
| 7318 | UBA7 | 10 | Linear | 2.6 | 0.5 | -27.1 | 0.07 | -0.08 | 0.03 | 0.19 | 0.29 | 0.46 |
| 53820 | RIPPLY3 | 10 | Poly 2 | 4.3 | 0.8 | -0.3 | 0.02 | -0.09 | -0.04 | -0.09 | -0.21 | 0.55 |
| 254887 | ZDHHC23 | 10 | Poly 2 | 0.6 | 0.3 | -57.9 | 0.04 | 0.12 | 0.04 | 0.16 | 0.43 | 0.57 |
| 4303 | FOXO4 | 10 | Exp 4 | 1 | 0.7 | -6.3 | 0.07 | 0.15 | 0.14 | 0.13 | 0.44 | 0.54 |
| 23762 | OSBP2 | 10 | Exp 2 | 3.5 | 1 | -29.6 | 0.01 | 0.06 | 0.05 | 0.14 | 0.10 | 0.41 |
| 283991 | UBALD2 | 10 | Poly 2 | 3.6 | 0.4 | 118.7 | 0.22 | -0.02 | -0.01 | -0.12 | 0.10 | 0.72 |
| 6948 | TCN2 | 10 | Exp 2 | 2.1 | 0.8 | -59.7 | 0.07 | -0.06 | 0.04 | 0.06 | 0.14 | 0.44 |
| 126282 | TNFAIP8L1 | 10 | Exp 2 | 1.6 | 1 | 124.8 | -0.05 | -0.03 | -0.05 | -0.02 | 0.22 | 0.58 |
| 25840 | METTL7A | 10 | Exp 2 | 1.1 | 0.5 | -24.8 | 0.01 | -0.05 | -0.04 | -0.06 | 0.45 | 1.05 |
| 163702 | IFNLR1 | 10 | Linear | 1.6 | 0.9 | -42.6 | -0.06 | -0.10 | -0.01 | -0.02 | 0.23 | 0.50 |
| 6490 | PMEL | 10 | Exp 5 | 0.5 | 0.6 | -41.7 | 0.01 | -0.01 | -0.06 | 0.04 | 0.08 | 0.42 |
| 333929 | SNAI3 | 10 | Exp 3 | 4.7 | 0.9 | -122.1 | 0.02 | 0.11 | 0.07 | 0.10 | -0.07 | 0.46 |
| 3434 | IFIT1 | 10 | Linear | 1.7 | 0 | 102.2 | -0.17 | -0.01 | -0.15 | 0.05 | 0.25 | 0.62 |
| 126432 | RINL | 10 | Linear | 1.3 | 1 | -44.4 | -0.01 | -0.04 | -0.01 | 0.06 | 0.22 | 0.57 |
| 399473 | SPRED3 | 10 | Exp 2 | 3.5 | 0.2 | -4.9 | 0.24 | 0.05 | 0.04 | 0.01 | 0.18 | 0.50 |
| 284697 | BTBD8 | 10 | Exp 2 | 1.9 | 0.7 | -87.2 | 0.02 | -0.11 | -0.03 | -0.06 | 0.17 | 0.42 |
| 10388 | SYCP2 | 10 | Linear | 2.1 | 0.4 | 30.6 | -0.13 | -0.01 | -0.04 | 0.12 | 0.31 | 0.44 |
| 9687 | GREB1 | 10 | Poly 2 | 3 | 0.5 | -157.3 | -0.02 | -0.03 | -0.06 | -0.01 | -0.09 | 0.46 |
| 55959 | SULF2 | 10 | Exp 2 | 2 | 0.6 | -120.8 | 0.01 | 0.11 | 0.12 | -0.01 | 0.22 | 0.64 |
| 353133 | LCE1C | 10 | Power | 4.7 | 0 | -168.9 | 0.06 | -0.16 | 0.05 | 0.09 | -0.03 | 0.43 |
| 6799 | SULT1A2 | 10 | Linear | 2.4 | 0.1 | -123.4 | 0.08 | 0.14 | 0.07 | 0.14 | 0.15 | 0.38 |
| 81031 | SLC2A10 | 10 | Exp 2 | 1.9 | 0.7 | 9 | 0.07 | 0.12 | 0.04 | 0.12 | 0.21 | 0.51 |
| 55924;101928718 | FAM212B;LOC101928718 | 10 | Exp 2 | 2.1 | 0.8 | -28.7 | 0.15 | 0.11 | 0.09 | 0.04 | 0.26 | 0.62 |
| 23303 | KIF13B | 10 | Exp 2 | 1.6 | 1 | 124.4 | 0.03 | 0.06 | 0.05 | 0.03 | 0.26 | 0.57 |
| 115948 | CCDC151 | 10 | Linear | 2.7 | 0.9 | -84.9 | 0.03 | 0.15 | 0.07 | 0.15 | 0.23 | 0.39 |
| 161145 | TMEM229B | 10 | Exp 2 | 2.1 | 0 | -149.4 | -0.01 | -0.33 | -0.08 | 0.04 | 0.04 | 0.41 |
| 26112 | CCDC69 | 10 | Exp 2 | 1.8 | 0.2 | -48.9 | 0.09 | -0.13 | 0.00 | -0.05 | 0.19 | 0.58 |
| 92235 | DUSP27 | 10 | Poly 2 | 0.6 | 0.3 | -17.3 | -0.01 | 0.16 | 0.21 | 0.08 | 0.61 | 0.58 |
| NA | NA | 10 | Exp 2 | 2.4 | 0.7 | -185.5 | 0.02 | 0.02 | 0.22 | 0.08 | 0.21 | 0.55 |
| 9666 | DZIP3 | 10 | Linear | 0.6 | 0.2 | 183.8 | -0.14 | -0.09 | -0.08 | 0.04 | 0.35 | 0.73 |
| 6920 | TCEA3 | 10 | Linear | 1.5 | 0.4 | -84.9 | 0.09 | 0.12 | 0.02 | 0.13 | 0.34 | 0.49 |
| 4758 | NEU1 | 10 | Linear | 1 | 0.7 | 165.9 | -0.03 | -0.03 | -0.05 | 0.12 | 0.31 | 0.66 |
| 346653 | FAM71F2 | 10 | Exp 2 | 2.2 | 0.8 | -71.2 | 0.12 | -0.03 | 0.07 | 0.07 | 0.20 | 0.52 |
| 645121 | CCNI2 | 10 | Linear | 2.1 | 0.8 | -64 | 0.04 | 0.04 | 0.08 | 0.04 | 0.31 | 0.45 |
| 57139 | RGL3 | 10 | Poly 2 | 4.1 | 0.5 | 56.7 | 0.14 | -0.01 | 0.13 | -0.16 | 0.04 | 0.52 |
| NA | NA | 10 | Linear | 0.8 | 0 | -212.2 | -0.06 | -0.11 | 0.01 | 0.12 | 0.17 | 0.50 |
| 57523 | NYNRIN | 10 | Power | 4.8 | 0.1 | 66.3 | 0.14 | -0.10 | -0.07 | -0.07 | -0.02 | 0.53 |
| 5268 | SERPINB5 | 10 | Linear | 1.2 | 0.2 | -125 | 0.06 | 0.11 | 0.01 | -0.01 | 0.34 | 0.65 |
| 55652 | SLC48A1 | 10 | Exp 2 | 2.2 | 0.9 | 104.2 | 0.07 | -0.04 | 0.09 | 0.01 | 0.15 | 0.61 |
| 100132707 | PAXIP1-AS2 | 10 | Exp 3 | 3.1 | 0.4 | -58.9 | 0.07 | 0.01 | -0.08 | 0.04 | 0.08 | 0.42 |
| 54492 | NEURL1B | 10 | Exp 2 | 1.8 | 0.9 | 95.1 | -0.02 | -0.04 | -0.09 | 0.03 | 0.17 | 0.71 |
| 149478 | BTBD19 | 10 | Linear | 2.9 | 0.4 | 14.1 | 0.13 | 0.04 | 0.22 | -0.04 | 0.34 | 0.47 |
| 100505538 | RBM26-AS1 | 10 | Linear | 1.5 | 0.4 | -29 | -0.07 | -0.09 | -0.05 | -0.08 | 0.20 | 0.41 |
| 106614088 | MIR34AHG | 10 | Linear | 1.6 | 0.8 | -106.2 | -0.08 | 0.06 | -0.08 | 0.08 | 0.27 | 0.51 |
| NA | NA | 10 | Exp 2 | 2.6 | 0.1 | -6.7 | -0.01 | 0.15 | 0.06 | 0.26 | 0.13 | 0.46 |
| 100093631 | GTF2IP4 | 10 | Exp 2 | 1.9 | 0.4 | -30.4 | -0.19 | -0.11 | 0.04 | 0.05 | 0.06 | 0.45 |
| NA | NA | 10 | Linear | 1.3 | 0.4 | -69.8 | 0.00 | 0.08 | 0.06 | 0.17 | 0.33 | 0.56 |
| NA | NA | 10 | Linear | 1.5 | 0 | -111 | 0.20 | -0.02 | 0.14 | 0.00 | 0.33 | 0.62 |
| 102724571 | LOC102724571 | 10 | Linear | 1.4 | 0.6 | -157.6 | 0.03 | 0.15 | 0.07 | 0.22 | 0.22 | 0.56 |
| NA | NA | 10 | Poly 3 | 1.6 | 0 | -183.1 | 0.02 | 0.10 | -0.07 | -0.05 | 0.39 | 0.30 |
| NA | NA | 10 | Poly 2 | 3.2 | 0.3 | -127.8 | -0.08 | -0.08 | -0.14 | -0.27 | -0.19 | 0.57 |
| NA | NA | 10 | Exp 2 | 2.1 | 0.3 | -72.9 | -0.08 | 0.04 | -0.06 | 0.05 | 0.04 | 0.46 |
| 100506881 | MKLN1-AS | 10 | Exp 2 | 2.7 | 0.6 | -46.2 | 0.14 | 0.07 | 0.10 | 0.04 | 0.22 | 0.40 |
| 352954 | GATS | 10 | Exp 2 | 1.3 | 0.6 | -15.4 | 0.01 | -0.07 | -0.01 | 0.03 | 0.17 | 0.66 |
| 112817 | HOGA1 | 10 | Linear | 2 | 0.8 | -58.5 | 0.07 | -0.03 | 0.04 | 0.10 | 0.27 | 0.41 |
| 442213 | PTCHD4 | 10 | Exp 2 | 2.8 | 0 | -135 | 0.14 | -0.23 | 0.04 | -0.08 | 0.17 | 0.41 |
| 101927221 | UBR5-AS1 | 10 | Exp 2 | 3.3 | 0.2 | -75.1 | 0.06 | 0.20 | 0.20 | 0.05 | 0.20 | 0.43 |
| 100131089 | SRP14-AS1 | 10 | Exp 2 | 1.8 | 1 | -39.8 | 0.02 | 0.04 | 0.04 | 0.08 | 0.13 | 0.43 |
| 90342 | FER1L5 | 10 | Exp 2 | 1.7 | 0.7 | -65.8 | 0.02 | 0.06 | 0.04 | 0.00 | 0.09 | 0.39 |
| NA | NA | 10 | Linear | 1.3 | 0.2 | -52.4 | -0.08 | 0.10 | -0.04 | 0.02 | 0.33 | 0.47 |
| 643401 | LINC01021 | 10 | Poly 3 | 1.1 | 0.1 | -97.5 | 0.29 | 0.23 | 0.21 | 0.21 | 0.89 | 1.62 |
| NA | NA | 10 | Exp 2 | 2.7 | 0.5 | -176.6 | 0.09 | 0.11 | 0.17 | 0.10 | 0.08 | 0.50 |
| NA | NA | 10 | Exp 2 | 1.4 | 0.8 | -47.1 | 0.03 | 0.05 | 0.10 | 0.08 | 0.15 | 0.48 |
| NA | NA | 10 | Exp 2 | 1.8 | 0.3 | -137.3 | -0.11 | -0.22 | -0.20 | -0.04 | 0.03 | 0.63 |
| NA | NA | 10 | Poly 2 | 0.5 | 0.4 | -57 | 0.03 | -0.06 | 0.08 | 0.07 | 0.42 | 0.44 |
| NA | NA | 10 | Linear | 2.1 | 0.3 | -65.8 | 0.00 | -0.05 | 0.04 | -0.04 | 0.10 | 0.40 |
| NA | NA | 10 | Exp 2 | 1.7 | 1 | -35.8 | -0.05 | -0.01 | 0.02 | 0.10 | 0.20 | 0.64 |
| NA | NA | 10 | Linear | 1.6 | 0.1 | -214 | -0.09 | -0.05 | 0.06 | 0.12 | 0.16 | 0.41 |
| 101929457 | LOC101929457 | 10 | Exp 2 | 1.9 | 0 | -158.3 | -0.04 | -0.08 | -0.11 | 0.19 | 0.08 | 0.59 |
| NA | NA | 10 | Exp 2 | 1.4 | 0 | -80.8 | -0.01 | -0.19 | 0.00 | 0.04 | 0.09 | 0.60 |
| 101927957 | LINC01572 | 10 | Exp 2 | 2.1 | 0.2 | -15.2 | 0.20 | 0.06 | 0.12 | 0.06 | 0.25 | 0.45 |
| NA | NA | 10 | Exp 2 | 1.6 | 0.1 | -9.6 | -0.11 | 0.03 | 0.15 | -0.11 | 0.21 | 0.59 |
| 100507002 | LOC100507002 | 10 | Exp 2 | 2.3 | 0.3 | -44.5 | -0.16 | -0.12 | -0.12 | 0.06 | 0.09 | 0.44 |
| 554282 | FAM72C | 10 | Linear | 3.4 | 0.6 | -15 | 0.07 | 0.04 | 0.21 | -0.10 | 0.20 | 0.39 |
| 100507410 | C1QTNF1-AS1 | 10 | Linear | 2.7 | 0.9 | -157.5 | 0.14 | 0.11 | 0.08 | 0.19 | 0.24 | 0.39 |
| NA | NA | 10 | Linear | 1.9 | 0.8 | -19.7 | -0.03 | -0.07 | -0.06 | 0.11 | 0.27 | 0.42 |
| 101927837 | LOC101927837 | 10 | Linear | 2.3 | 0.9 | -31 | 0.10 | 0.01 | 0.12 | 0.14 | 0.19 | 0.46 |
| NA | NA | 10 | Linear | 2.7 | 0.4 | -110.7 | 0.11 | 0.14 | -0.02 | 0.10 | 0.25 | 0.39 |
| 729438 | GATSL2 | 10 | Exp 2 | 2.9 | 0.9 | 66.2 | 0.11 | 0.14 | 0.19 | -0.09 | 0.12 | 0.58 |
| 8344 | HIST1H2BE | 10 | Linear | 1.4 | 1 | 12.1 | 0.02 | 0.01 | 0.02 | 0.02 | 0.27 | 0.55 |
| NA | NA | 10 | Linear | 1.9 | 0.9 | -115.5 | -0.07 | 0.00 | 0.03 | -0.01 | 0.19 | 0.40 |
| 8294 | HIST1H4I | 10 | Exp 4 | 0.7 | 0.9 | -24 | 0.04 | 0.12 | 0.11 | 0.19 | 0.45 | 0.66 |
| NA | NA | 10 | Exp 2 | 2.3 | 0.1 | -155.6 | -0.06 | 0.02 | 0.12 | 0.05 | -0.08 | 0.42 |
| 201299 | RDM1 | 10 | Linear | 1.5 | 0.5 | -68.4 | 0.00 | -0.06 | -0.07 | 0.10 | 0.21 | 0.40 |
| NA | NA | 10 | Linear | 0.9 | 0.3 | -48.3 | -0.03 | 0.00 | 0.17 | 0.04 | 0.36 | 0.56 |
| NA | NA | 10 | Linear | 2.3 | 0 | -30.5 | 0.10 | 0.04 | 0.24 | -0.03 | 0.22 | 0.43 |
| 106144537 | LINC01173 | 10 | Linear | 1.5 | 0.3 | -217.6 | 0.02 | 0.07 | 0.15 | 0.15 | 0.15 | 0.42 |
| 100506776 | TRG-AS1 | 10 | Linear | 1.8 | 0.2 | -96.7 | 0.01 | 0.09 | -0.05 | 0.18 | 0.27 | 0.42 |
| 100129716 | ARRDC3-AS1 | 10 | Linear | 2 | 1 | -66.4 | -0.04 | -0.01 | 0.09 | -0.03 | 0.19 | 0.40 |
| 3075 | CFH | 10 | NA | NA | NA | NA | -0.08 | -0.05 | -0.06 | 0.17 | 0.32 | 0.41 |
| 57185 | NIPAL3 | 10 | NA | NA | NA | NA | -0.02 | 0.00 | 0.01 | 0.01 | 0.10 | 0.47 |
| 5164 | PDK2 | 10 | NA | NA | NA | NA | 0.17 | -0.11 | -0.04 | -0.02 | 0.01 | 0.48 |
| 414 | ARSD | 10 | NA | NA | NA | NA | 0.05 | 0.12 | 0.09 | 0.18 | 0.31 | 0.38 |
| 9918 | NCAPD2 | 10 | NA | NA | NA | NA | 0.16 | -0.04 | 0.08 | -0.02 | -0.01 | 0.41 |
| 11188 | NISCH | 10 | NA | NA | NA | NA | 0.10 | 0.05 | 0.10 | -0.04 | 0.15 | 0.42 |
| 3077 | HFE | 10 | NA | NA | NA | NA | -0.01 | 0.08 | 0.11 | 0.06 | 0.35 | 0.49 |
| 57658 | CALCOCO1 | 10 | NA | NA | NA | NA | 0.05 | -0.05 | -0.05 | -0.03 | 0.12 | 0.48 |
| 10460 | TACC3 | 10 | NA | NA | NA | NA | 0.05 | 0.11 | 0.21 | -0.02 | -0.01 | 0.44 |
| 1373 | CPS1 | 10 | NA | NA | NA | NA | -0.04 | -0.18 | -0.11 | 0.08 | 0.24 | 0.49 |
| 51306 | FAM13B | 10 | NA | NA | NA | NA | -0.13 | -0.01 | 0.03 | 0.02 | 0.30 | 0.41 |
| 3029 | HAGH | 10 | NA | NA | NA | NA | 0.01 | 0.09 | 0.02 | 0.06 | 0.17 | 0.53 |
| 259266 | ASPM | 10 | NA | NA | NA | NA | -0.09 | -0.04 | -0.01 | 0.00 | 0.25 | 0.55 |
| 2261 | FGFR3 | 10 | NA | NA | NA | NA | 0.01 | -0.06 | -0.03 | 0.03 | 0.19 | 0.45 |
| 3430 | IFI35 | 10 | NA | NA | NA | NA | 0.11 | 0.13 | 0.11 | 0.10 | 0.19 | 0.42 |
| 55771 | PRR11 | 10 | NA | NA | NA | NA | 0.12 | -0.16 | -0.05 | -0.14 | -0.09 | 0.39 |
| 51447 | IP6K2 | 10 | NA | NA | NA | NA | -0.01 | 0.00 | 0.01 | 0.04 | 0.17 | 0.42 |
| 10420 | TESK2 | 10 | NA | NA | NA | NA | 0.05 | -0.01 | -0.08 | -0.02 | 0.03 | 0.41 |
| 3993 | LLGL2 | 10 | NA | NA | NA | NA | 0.01 | -0.02 | 0.12 | 0.11 | 0.14 | 0.52 |
| 51512 | GTSE1 | 10 | NA | NA | NA | NA | 0.00 | -0.13 | -0.02 | -0.05 | 0.04 | 0.54 |
| 10615 | SPAG5 | 10 | NA | NA | NA | NA | -0.01 | 0.00 | -0.02 | 0.03 | 0.16 | 0.53 |
| 5527 | PPP2R5C | 10 | NA | NA | NA | NA | -0.01 | -0.03 | -0.01 | 0.06 | 0.21 | 0.40 |
| 55063 | ZCWPW1 | 10 | NA | NA | NA | NA | -0.09 | 0.10 | -0.02 | 0.04 | 0.32 | 0.38 |
| 10403 | NDC80 | 10 | NA | NA | NA | NA | -0.15 | -0.02 | -0.09 | 0.07 | 0.17 | 0.50 |
| 3732 | CD82 | 10 | NA | NA | NA | NA | -0.22 | -0.18 | 0.03 | 0.05 | 0.24 | 0.39 |
| 5243 | ABCB1 | 10 | NA | NA | NA | NA | -0.06 | 0.00 | -0.02 | 0.13 | 0.21 | 0.40 |
| 28971 | AAMDC | 10 | NA | NA | NA | NA | 0.05 | 0.10 | 0.02 | 0.22 | 0.28 | 0.41 |
| 332 | BIRC5 | 10 | NA | NA | NA | NA | -0.09 | -0.04 | -0.06 | 0.11 | 0.20 | 0.46 |
| 3383 | ICAM1 | 10 | NA | NA | NA | NA | 0.16 | 0.04 | 0.17 | 0.18 | 0.32 | 0.43 |
| 24137 | KIF4A | 10 | NA | NA | NA | NA | -0.07 | 0.02 | 0.01 | 0.06 | 0.29 | 0.57 |
| 1384 | CRAT | 10 | NA | NA | NA | NA | 0.11 | -0.01 | 0.07 | 0.03 | 0.11 | 0.39 |
| 80173 | IFT74 | 10 | NA | NA | NA | NA | -0.23 | 0.01 | -0.08 | 0.00 | 0.20 | 0.41 |
| 25777 | SUN2 | 10 | NA | NA | NA | NA | 0.08 | 0.02 | 0.08 | 0.10 | 0.19 | 0.41 |
| 9145 | SYNGR1 | 10 | NA | NA | NA | NA | -0.03 | -0.06 | 0.01 | 0.08 | 0.20 | 0.39 |
| 5905 | RANGAP1 | 10 | NA | NA | NA | NA | 0.07 | 0.05 | 0.04 | 0.04 | 0.05 | 0.39 |
| 4776 | NFATC4 | 10 | NA | NA | NA | NA | 0.03 | -0.05 | -0.01 | -0.09 | 0.05 | 0.42 |
| 81610 | FAM83D | 10 | NA | NA | NA | NA | 0.04 | 0.05 | 0.03 | 0.01 | 0.02 | 0.40 |
| 215 | ABCD1 | 10 | NA | NA | NA | NA | 0.19 | 0.01 | 0.12 | 0.04 | 0.15 | 0.44 |
| 6674 | SPAG1 | 10 | NA | NA | NA | NA | -0.07 | -0.01 | -0.03 | 0.03 | 0.26 | 0.42 |
| 25865 | PRKD2 | 10 | NA | NA | NA | NA | 0.08 | 0.09 | 0.11 | -0.02 | 0.11 | 0.42 |
| 51343 | FZR1 | 10 | NA | NA | NA | NA | 0.11 | 0.03 | 0.04 | -0.02 | 0.10 | 0.48 |
| 27113 | BBC3 | 10 | NA | NA | NA | NA | -0.06 | -0.12 | -0.18 | -0.08 | 0.04 | 0.43 |
| 56917 | MEIS3 | 10 | NA | NA | NA | NA | 0.02 | -0.02 | 0.03 | 0.16 | 0.30 | 0.39 |
| 9266 | CYTH2 | 10 | NA | NA | NA | NA | 0.03 | 0.03 | 0.08 | -0.04 | 0.17 | 0.51 |
| 22900 | CARD8 | 10 | NA | NA | NA | NA | 0.03 | 0.06 | 0.02 | -0.12 | 0.10 | 0.45 |
| 9545 | RAB3D | 10 | NA | NA | NA | NA | 0.00 | -0.05 | 0.15 | 0.04 | 0.15 | 0.48 |
| 51477 | ISYNA1 | 10 | NA | NA | NA | NA | 0.17 | -0.01 | 0.06 | 0.07 | 0.08 | 0.41 |
| 199731 | CADM4 | 10 | NA | NA | NA | NA | -0.01 | 0.07 | 0.13 | 0.09 | 0.27 | 0.49 |
| 727 | C5 | 10 | NA | NA | NA | NA | -0.02 | -0.03 | 0.01 | 0.14 | 0.28 | 0.45 |
| 203 | AK1 | 10 | NA | NA | NA | NA | -0.01 | -0.13 | -0.02 | 0.17 | 0.11 | 0.45 |
| 5264 | PHYH | 10 | NA | NA | NA | NA | -0.06 | 0.09 | 0.10 | -0.06 | 0.19 | 0.41 |
| 27338 | UBE2S | 10 | NA | NA | NA | NA | 0.11 | 0.13 | 0.06 | -0.11 | 0.08 | 0.42 |
| 8153 | RND2 | 10 | NA | NA | NA | NA | 0.00 | 0.00 | 0.01 | 0.12 | 0.30 | 0.43 |
| 9094 | UNC119 | 10 | NA | NA | NA | NA | -0.04 | -0.06 | -0.04 | 0.08 | 0.09 | 0.39 |
| 10874 | NMU | 10 | NA | NA | NA | NA | -0.14 | -0.10 | -0.04 | 0.14 | 0.24 | 0.39 |
| 23321 | TRIM2 | 10 | NA | NA | NA | NA | -0.05 | -0.03 | 0.05 | 0.06 | 0.24 | 0.40 |
| 22897 | CEP164 | 10 | NA | NA | NA | NA | 0.06 | 0.04 | 0.03 | -0.02 | 0.17 | 0.39 |
| 83461 | CDCA3 | 10 | NA | NA | NA | NA | 0.02 | 0.04 | -0.05 | 0.04 | 0.07 | 0.54 |
| 7272 | TTK | 10 | NA | NA | NA | NA | -0.09 | -0.09 | -0.12 | 0.00 | 0.10 | 0.39 |
| 10902 | BRD8 | 10 | NA | NA | NA | NA | 0.10 | 0.06 | 0.05 | -0.05 | 0.01 | 0.47 |
| 80321 | CEP70 | 10 | NA | NA | NA | NA | -0.15 | -0.03 | -0.11 | 0.04 | 0.25 | 0.51 |
| 8850 | KAT2B | 10 | NA | NA | NA | NA | 0.01 | -0.04 | 0.02 | 0.02 | 0.13 | 0.38 |
| 1058 | CENPA | 10 | NA | NA | NA | NA | -0.06 | 0.02 | -0.01 | -0.02 | 0.09 | 0.44 |
| 64838 | FNDC4 | 10 | NA | NA | NA | NA | -0.09 | -0.10 | 0.00 | 0.03 | 0.09 | 0.39 |
| 84695 | LOXL3 | 10 | NA | NA | NA | NA | 0.10 | -0.06 | 0.06 | 0.06 | 0.18 | 0.41 |
| 127700 | OSCP1 | 10 | NA | NA | NA | NA | -0.11 | -0.10 | -0.06 | 0.11 | 0.29 | 0.39 |
| 991 | CDC20 | 10 | NA | NA | NA | NA | 0.00 | 0.00 | 0.00 | 0.06 | 0.05 | 0.42 |
| 8674 | VAMP4 | 10 | NA | NA | NA | NA | -0.09 | -0.04 | 0.00 | 0.00 | 0.39 | 0.40 |
| 9414 | TJP2 | 10 | NA | NA | NA | NA | 0.07 | 0.13 | 0.14 | 0.12 | 0.29 | 0.51 |
| 5228 | PGF | 10 | NA | NA | NA | NA | 0.09 | 0.10 | 0.10 | 0.26 | 0.39 | 0.49 |
| 3437 | IFIT3 | 10 | NA | NA | NA | NA | -0.12 | -0.05 | -0.08 | 0.07 | 0.22 | 0.41 |
| 3433 | IFIT2 | 10 | NA | NA | NA | NA | -0.05 | 0.07 | 0.01 | 0.13 | 0.31 | 0.38 |
| 4093 | SMAD9 | 10 | NA | NA | NA | NA | 0.13 | 0.06 | 0.05 | -0.07 | 0.21 | 0.55 |
| 8795 | TNFRSF10B | 10 | NA | NA | NA | NA | 0.03 | 0.02 | 0.06 | 0.09 | 0.20 | 0.42 |
| 81558 | FAM117A | 10 | NA | NA | NA | NA | 0.08 | 0.13 | 0.02 | -0.10 | 0.05 | 0.49 |
| 81930 | KIF18A | 10 | NA | NA | NA | NA | -0.12 | -0.07 | -0.10 | 0.04 | 0.17 | 0.39 |
| 343099 | CCDC18 | 10 | NA | NA | NA | NA | -0.16 | 0.05 | -0.08 | 0.05 | 0.27 | 0.44 |
| 11113 | CIT | 10 | NA | NA | NA | NA | 0.17 | -0.07 | 0.05 | -0.10 | -0.02 | 0.51 |
| 4327 | MMP19 | 10 | NA | NA | NA | NA | 0.15 | -0.10 | 0.01 | 0.00 | -0.07 | 0.41 |
| 1164 | CKS2 | 10 | NA | NA | NA | NA | -0.01 | -0.03 | -0.07 | 0.10 | 0.15 | 0.47 |
| 24139 | EML2 | 10 | NA | NA | NA | NA | 0.11 | 0.13 | 0.07 | 0.09 | 0.22 | 0.48 |
| 6776 | STAT5A | 10 | NA | NA | NA | NA | 0.02 | 0.10 | 0.07 | 0.07 | 0.24 | 0.43 |
| 9787 | DLGAP5 | 10 | NA | NA | NA | NA | -0.17 | -0.05 | -0.11 | 0.11 | 0.28 | 0.57 |
| 79575 | ABHD8 | 10 | NA | NA | NA | NA | 0.05 | -0.14 | -0.06 | -0.02 | -0.03 | 0.39 |
| 50809 | HP1BP3 | 10 | NA | NA | NA | NA | -0.03 | -0.06 | -0.03 | -0.01 | 0.14 | 0.41 |
| 200316 | APOBEC3F | 10 | NA | NA | NA | NA | 0.15 | 0.12 | 0.08 | 0.07 | 0.24 | 0.42 |
| 90417 | KNSTRN | 10 | NA | NA | NA | NA | -0.11 | -0.07 | -0.11 | 0.10 | 0.20 | 0.50 |
| 54832 | VPS13C | 10 | NA | NA | NA | NA | -0.10 | 0.16 | 0.17 | 0.03 | 0.20 | 0.44 |
| 9754 | STARD8 | 10 | NA | NA | NA | NA | 0.07 | -0.06 | 0.08 | -0.02 | 0.06 | 0.45 |
| 148229 | ATP8B3 | 10 | NA | NA | NA | NA | 0.21 | 0.01 | 0.08 | 0.04 | 0.04 | 0.49 |
| 83861 | RSPH3 | 10 | NA | NA | NA | NA | 0.02 | 0.03 | 0.09 | 0.04 | 0.31 | 0.47 |
| 9885 | OSBPL2 | 10 | NA | NA | NA | NA | 0.04 | 0.09 | 0.08 | 0.13 | 0.24 | 0.38 |
| 10585 | POMT1 | 10 | NA | NA | NA | NA | 0.01 | -0.05 | 0.00 | 0.03 | 0.14 | 0.40 |
| 9026 | HIP1R | 10 | NA | NA | NA | NA | 0.08 | 0.06 | 0.10 | 0.08 | 0.15 | 0.42 |
| 55902 | ACSS2 | 10 | NA | NA | NA | NA | 0.06 | -0.12 | 0.03 | 0.12 | 0.20 | 0.46 |
| 10955 | SERINC3 | 10 | NA | NA | NA | NA | -0.04 | 0.00 | 0.02 | -0.01 | 0.27 | 0.44 |
| 114904 | C1QTNF6 | 10 | NA | NA | NA | NA | 0.13 | -0.08 | 0.03 | -0.09 | 0.02 | 0.45 |
| 10024 | TROAP | 10 | NA | NA | NA | NA | 0.13 | 0.00 | 0.00 | -0.09 | -0.04 | 0.51 |
| 80003 | PCNX2 | 10 | NA | NA | NA | NA | 0.10 | 0.12 | 0.18 | 0.15 | 0.22 | 0.41 |
| 26586 | CKAP2 | 10 | NA | NA | NA | NA | -0.10 | -0.04 | -0.01 | 0.00 | 0.17 | 0.47 |
| 11173 | ADAMTS7 | 10 | NA | NA | NA | NA | 0.06 | -0.02 | 0.05 | -0.11 | 0.03 | 0.40 |
| 84904 | ARHGEF39 | 10 | NA | NA | NA | NA | 0.05 | 0.00 | 0.04 | 0.02 | 0.05 | 0.54 |
| 51439 | FAM8A1 | 10 | NA | NA | NA | NA | -0.05 | -0.01 | 0.06 | 0.06 | 0.43 | 0.54 |
| 51203 | NUSAP1 | 10 | NA | NA | NA | NA | -0.14 | -0.02 | -0.10 | 0.03 | 0.17 | 0.44 |
| 51626 | DYNC2LI1 | 10 | NA | NA | NA | NA | -0.05 | 0.01 | -0.03 | 0.14 | 0.26 | 0.44 |
| 84171 | LOXL4 | 10 | NA | NA | NA | NA | -0.01 | -0.08 | 0.09 | 0.21 | 0.47 | 0.41 |
| 9585 | KIF20B | 10 | NA | NA | NA | NA | -0.05 | 0.00 | -0.04 | 0.04 | 0.24 | 0.51 |
| 10063 | COX17 | 10 | NA | NA | NA | NA | -0.01 | 0.14 | 0.04 | 0.09 | 0.37 | 0.51 |
| 83464 | APH1B | 10 | NA | NA | NA | NA | -0.13 | -0.12 | -0.05 | 0.08 | 0.26 | 0.45 |
| 55008 | HERC6 | 10 | NA | NA | NA | NA | 0.03 | -0.23 | -0.13 | -0.09 | -0.05 | 0.39 |
| 1062 | CENPE | 10 | NA | NA | NA | NA | -0.18 | 0.06 | -0.05 | 0.03 | 0.30 | 0.59 |
| 23710 | GABARAPL1 | 10 | NA | NA | NA | NA | -0.02 | 0.09 | 0.01 | 0.10 | 0.38 | 0.45 |
| 92979 | 09-Mar | 10 | NA | NA | NA | NA | 0.06 | 0.04 | 0.02 | 0.04 | 0.26 | 0.41 |
| 55266 | TMEM19 | 10 | NA | NA | NA | NA | -0.04 | -0.04 | -0.01 | 0.09 | 0.34 | 0.58 |
| 283537 | SLC46A3 | 10 | NA | NA | NA | NA | -0.07 | 0.01 | 0.03 | 0.09 | 0.37 | 0.41 |
| 9990 | SLC12A6 | 10 | NA | NA | NA | NA | 0.07 | -0.10 | 0.02 | -0.04 | 0.08 | 0.42 |
| 80119 | PIF1 | 10 | NA | NA | NA | NA | 0.02 | 0.04 | -0.06 | -0.09 | 0.02 | 0.43 |
| 10351 | ABCA8 | 10 | NA | NA | NA | NA | -0.09 | -0.07 | 0.00 | 0.07 | 0.27 | 0.42 |
| 112483 | SAT2 | 10 | NA | NA | NA | NA | -0.02 | 0.00 | -0.03 | 0.12 | 0.08 | 0.39 |
| 23038 | WDTC1 | 10 | NA | NA | NA | NA | 0.20 | 0.00 | 0.13 | -0.05 | 0.02 | 0.47 |
| 11004 | KIF2C | 10 | NA | NA | NA | NA | -0.03 | -0.04 | -0.08 | 0.06 | 0.13 | 0.53 |
| 83540 | NUF2 | 10 | NA | NA | NA | NA | -0.19 | -0.01 | -0.09 | 0.10 | 0.27 | 0.48 |
| 57530 | CGN | 10 | NA | NA | NA | NA | -0.01 | 0.08 | 0.17 | 0.08 | 0.35 | 0.48 |
| 5993 | RFX5 | 10 | NA | NA | NA | NA | -0.09 | -0.01 | -0.07 | 0.11 | 0.26 | 0.48 |
| 55793 | FAM63A | 10 | NA | NA | NA | NA | 0.03 | -0.16 | -0.03 | -0.02 | -0.02 | 0.38 |
| 165215 | FAM171B | 10 | NA | NA | NA | NA | -0.05 | -0.01 | -0.05 | 0.04 | 0.33 | 0.44 |
| 93627 | TBCK | 10 | NA | NA | NA | NA | -0.03 | -0.14 | -0.07 | -0.03 | 0.06 | 0.38 |
| 64839 | FBXL17 | 10 | NA | NA | NA | NA | -0.02 | -0.08 | 0.00 | -0.10 | 0.21 | 0.51 |
| 4794 | NFKBIE | 10 | NA | NA | NA | NA | -0.05 | -0.06 | 0.00 | 0.18 | 0.27 | 0.41 |
| 10957 | PNRC1 | 10 | NA | NA | NA | NA | 0.04 | 0.12 | 0.12 | -0.13 | 0.15 | 0.48 |
| 120 | ADD3 | 10 | NA | NA | NA | NA | -0.10 | 0.02 | -0.02 | 0.09 | 0.34 | 0.41 |
| 726 | CAPN5 | 10 | NA | NA | NA | NA | 0.13 | -0.02 | 0.09 | -0.02 | 0.09 | 0.43 |
| 374618 | TEX9 | 10 | NA | NA | NA | NA | -0.03 | 0.00 | 0.00 | 0.06 | 0.31 | 0.42 |
| 160857 | CCDC122 | 10 | NA | NA | NA | NA | -0.02 | 0.00 | 0.07 | 0.08 | 0.42 | 0.36 |
| 10018 | BCL2L11 | 10 | NA | NA | NA | NA | 0.06 | -0.12 | 0.06 | -0.17 | -0.13 | 0.40 |
| NA | NA | 10 | NA | NA | NA | NA | -0.08 | -0.05 | -0.07 | 0.07 | 0.32 | 0.44 |
| 339145 | FAM92B | 10 | NA | NA | NA | NA | 0.00 | 0.07 | -0.05 | 0.03 | 0.15 | 0.38 |
| 201134 | CEP112 | 10 | NA | NA | NA | NA | 0.07 | 0.11 | 0.12 | 0.12 | 0.35 | 0.53 |
| 1525 | CXADR | 10 | NA | NA | NA | NA | 0.10 | 0.04 | 0.09 | -0.03 | 0.31 | 0.39 |
| 23097 | CDK19 | 10 | NA | NA | NA | NA | -0.10 | -0.18 | 0.04 | -0.04 | 0.14 | 0.43 |
| 9246 | UBE2L6 | 10 | NA | NA | NA | NA | 0.04 | 0.02 | 0.04 | 0.09 | 0.17 | 0.38 |
| 5603 | MAPK13 | 10 | NA | NA | NA | NA | 0.02 | -0.05 | 0.10 | 0.07 | 0.34 | 0.42 |
| 55607 | PPP1R9A | 10 | NA | NA | NA | NA | -0.06 | 0.03 | 0.04 | 0.07 | 0.29 | 0.40 |
| 9900 | SV2A | 10 | NA | NA | NA | NA | 0.21 | -0.06 | 0.04 | -0.08 | 0.02 | 0.41 |
| 715 | C1R | 10 | NA | NA | NA | NA | -0.06 | 0.09 | 0.02 | 0.02 | 0.10 | 0.39 |
| 10444 | ZER1 | 10 | NA | NA | NA | NA | 0.12 | 0.08 | 0.15 | -0.01 | 0.03 | 0.39 |
| 84446 | BRSK1 | 10 | NA | NA | NA | NA | -0.01 | 0.02 | -0.03 | 0.01 | 0.16 | 0.42 |
| 126133 | ALDH16A1 | 10 | NA | NA | NA | NA | 0.05 | 0.02 | 0.05 | 0.12 | 0.14 | 0.51 |
| 80174 | DBF4B | 10 | NA | NA | NA | NA | 0.14 | -0.01 | -0.03 | -0.10 | -0.06 | 0.41 |
| 29127 | RACGAP1 | 10 | NA | NA | NA | NA | -0.06 | -0.10 | -0.07 | 0.01 | 0.07 | 0.38 |
| 25802 | LMOD1 | 10 | NA | NA | NA | NA | 0.15 | 0.05 | 0.09 | 0.02 | 0.28 | 0.40 |
| 79411 | GLB1L | 10 | NA | NA | NA | NA | 0.06 | 0.09 | 0.00 | 0.17 | 0.18 | 0.39 |
| 151246 | SGOL2 | 10 | NA | NA | NA | NA | 0.01 | 0.09 | 0.12 | -0.03 | 0.19 | 0.53 |
| 78987 | CRELD1 | 10 | NA | NA | NA | NA | 0.07 | 0.00 | 0.02 | 0.07 | 0.16 | 0.39 |
| 285368 | PRRT3 | 10 | NA | NA | NA | NA | -0.03 | -0.01 | 0.01 | -0.06 | 0.05 | 0.40 |
| 57763 | ANKRA2 | 10 | NA | NA | NA | NA | -0.10 | -0.13 | -0.21 | -0.03 | 0.07 | 0.41 |
| 153222 | CREBRF | 10 | NA | NA | NA | NA | -0.01 | -0.03 | -0.09 | 0.02 | 0.26 | 0.47 |
| 216 | ALDH1A1 | 10 | NA | NA | NA | NA | -0.07 | 0.03 | -0.05 | 0.01 | 0.25 | 0.41 |
| 51084 | CRYL1 | 10 | NA | NA | NA | NA | -0.01 | 0.08 | 0.00 | 0.03 | 0.12 | 0.40 |
| 51222 | ZNF219 | 10 | NA | NA | NA | NA | -0.02 | -0.11 | 0.02 | 0.08 | 0.05 | 0.45 |
| 64112 | MOAP1 | 10 | NA | NA | NA | NA | -0.09 | 0.04 | -0.01 | 0.17 | 0.38 | 0.52 |
| 255394 | TCP11L2 | 10 | NA | NA | NA | NA | -0.13 | -0.10 | -0.13 | -0.04 | 0.13 | 0.43 |
| 83696 | TRAPPC9 | 10 | NA | NA | NA | NA | 0.20 | -0.01 | 0.08 | -0.07 | -0.03 | 0.39 |
| 5871 | MAP4K2 | 10 | NA | NA | NA | NA | 0.04 | 0.04 | 0.01 | 0.05 | 0.14 | 0.40 |
| 55872 | PBK | 10 | NA | NA | NA | NA | -0.14 | -0.02 | -0.07 | 0.04 | 0.26 | 0.50 |
| 115294 | PCMTD1 | 10 | NA | NA | NA | NA | -0.09 | 0.04 | 0.01 | -0.04 | 0.25 | 0.39 |
| 84913 | ATOH8 | 10 | NA | NA | NA | NA | 0.02 | -0.03 | -0.01 | 0.01 | 0.13 | 0.39 |
| 699 | BUB1 | 10 | NA | NA | NA | NA | -0.13 | -0.11 | -0.09 | 0.04 | 0.17 | 0.50 |
| 9121 | SLC16A5 | 10 | NA | NA | NA | NA | 0.10 | -0.01 | 0.08 | 0.00 | 0.20 | 0.40 |
| 983 | CDK1 | 10 | NA | NA | NA | NA | -0.15 | -0.07 | -0.11 | 0.03 | 0.10 | 0.46 |
| 98 | ACYP2 | 10 | NA | NA | NA | NA | 0.02 | 0.10 | 0.09 | 0.04 | 0.28 | 0.45 |
| 57449 | PLEKHG5 | 10 | NA | NA | NA | NA | 0.08 | 0.11 | 0.03 | 0.03 | 0.18 | 0.49 |
| 200523 | TEX37 | 10 | NA | NA | NA | NA | 0.00 | 0.12 | -0.06 | -0.01 | -0.01 | 0.41 |
| 8824 | CES2 | 10 | NA | NA | NA | NA | 0.16 | -0.02 | 0.03 | -0.01 | 0.09 | 0.46 |
| 283450 | HECTD4 | 10 | NA | NA | NA | NA | 0.20 | -0.02 | 0.20 | -0.06 | 0.05 | 0.51 |
| 29984 | RHOD | 10 | NA | NA | NA | NA | -0.05 | -0.08 | 0.00 | 0.10 | 0.21 | 0.50 |
| 1263 | PLK3 | 10 | NA | NA | NA | NA | 0.17 | 0.04 | 0.16 | 0.07 | 0.21 | 0.40 |
| 8722 | CTSF | 10 | NA | NA | NA | NA | -0.10 | -0.03 | -0.06 | 0.05 | 0.10 | 0.40 |
| 11041 | B4GAT1 | 10 | NA | NA | NA | NA | 0.01 | -0.04 | -0.03 | 0.05 | 0.11 | 0.41 |
| 11065 | UBE2C | 10 | NA | NA | NA | NA | 0.00 | 0.02 | -0.01 | 0.03 | 0.09 | 0.52 |
| 9793 | CKAP5 | 10 | NA | NA | NA | NA | 0.01 | -0.04 | 0.00 | 0.03 | 0.14 | 0.44 |
| 56675 | NRIP3 | 10 | NA | NA | NA | NA | -0.07 | -0.05 | -0.06 | 0.06 | 0.22 | 0.47 |
| 144245 | ALG10B | 10 | NA | NA | NA | NA | 0.02 | -0.03 | 0.12 | -0.12 | 0.27 | 0.42 |
| 146691 | TOM1L2 | 10 | NA | NA | NA | NA | 0.25 | -0.01 | 0.09 | -0.05 | 0.04 | 0.49 |
| 64787 | EPS8L2 | 10 | NA | NA | NA | NA | 0.03 | 0.03 | 0.12 | -0.02 | 0.19 | 0.42 |
| 55620 | STAP2 | 10 | NA | NA | NA | NA | -0.10 | -0.07 | -0.05 | 0.10 | 0.29 | 0.49 |
| 2517 | FUCA1 | 10 | NA | NA | NA | NA | -0.13 | -0.13 | -0.07 | 0.03 | 0.26 | 0.52 |
| NA | NA | 10 | NA | NA | NA | NA | 0.05 | -0.04 | 0.03 | 0.14 | 0.16 | 0.39 |
| 144811 | LACC1 | 10 | NA | NA | NA | NA | -0.14 | 0.07 | 0.13 | -0.03 | 0.42 | 0.38 |
| 84698 | CAPS2 | 10 | NA | NA | NA | NA | -0.11 | -0.12 | -0.03 | -0.01 | 0.08 | 0.39 |
| 284439 | SLC25A42 | 10 | NA | NA | NA | NA | -0.01 | -0.11 | -0.05 | -0.06 | 0.12 | 0.43 |
| 6448 | SGSH | 10 | NA | NA | NA | NA | 0.02 | 0.08 | 0.08 | 0.00 | 0.07 | 0.46 |
| 11022 | TDRKH | 10 | NA | NA | NA | NA | 0.02 | -0.09 | 0.00 | 0.05 | 0.13 | 0.50 |
| 11257 | TP53TG1 | 10 | NA | NA | NA | NA | -0.08 | -0.11 | -0.09 | 0.09 | 0.13 | 0.38 |
| 716 | C1S | 10 | NA | NA | NA | NA | -0.09 | -0.07 | -0.08 | 0.07 | 0.12 | 0.38 |
| 3838 | KPNA2 | 10 | NA | NA | NA | NA | 0.01 | -0.11 | -0.09 | -0.03 | -0.01 | 0.44 |
| 2242 | FES | 10 | NA | NA | NA | NA | 0.04 | 0.04 | 0.00 | 0.10 | 0.18 | 0.43 |
| 56849 | TCEAL7 | 10 | NA | NA | NA | NA | -0.04 | -0.04 | -0.05 | 0.08 | 0.24 | 0.44 |
| 114781 | BTBD9 | 10 | NA | NA | NA | NA | -0.03 | -0.04 | 0.03 | -0.04 | 0.14 | 0.39 |
| 79640 | C22orf46 | 10 | NA | NA | NA | NA | -0.04 | 0.35 | 0.26 | -0.10 | 0.26 | 0.45 |
| 752 | FMNL1 | 10 | NA | NA | NA | NA | 0.15 | 0.04 | 0.12 | -0.05 | 0.14 | 0.44 |
| 7127 | TNFAIP2 | 10 | NA | NA | NA | NA | 0.02 | 0.01 | 0.05 | 0.05 | 0.27 | 0.48 |
| 54103 | GSAP | 10 | NA | NA | NA | NA | -0.14 | -0.11 | -0.03 | 0.07 | 0.27 | 0.43 |
| 375033 | PEAR1 | 10 | NA | NA | NA | NA | 0.19 | 0.02 | 0.04 | -0.04 | 0.12 | 0.44 |
| 401494 | HACD4 | 10 | NA | NA | NA | NA | -0.05 | 0.03 | 0.10 | 0.07 | 0.27 | 0.43 |
| 6817 | SULT1A1 | 10 | NA | NA | NA | NA | -0.05 | -0.13 | 0.01 | 0.05 | 0.19 | 0.47 |
| 4646 | MYO6 | 10 | NA | NA | NA | NA | 0.10 | 0.06 | 0.21 | -0.02 | 0.07 | 0.39 |
| 79830 | ZMYM1 | 10 | NA | NA | NA | NA | -0.04 | -0.01 | 0.01 | -0.07 | 0.17 | 0.42 |
| 51170 | HSD17B11 | 10 | NA | NA | NA | NA | -0.09 | -0.01 | 0.00 | 0.06 | 0.28 | 0.53 |
| 219844 | HYLS1 | 10 | NA | NA | NA | NA | 0.01 | 0.01 | -0.12 | 0.05 | 0.14 | 0.50 |
| 192683 | SCAMP5 | 10 | NA | NA | NA | NA | 0.05 | -0.06 | -0.04 | -0.08 | -0.09 | 0.42 |
| 9055 | PRC1 | 10 | NA | NA | NA | NA | -0.12 | -0.03 | -0.09 | 0.07 | 0.22 | 0.45 |
| 780 | DDR1 | 10 | NA | NA | NA | NA | 0.06 | 0.02 | 0.03 | 0.07 | 0.27 | 0.53 |
| 3426 | CFI | 10 | NA | NA | NA | NA | -0.09 | -0.01 | -0.02 | 0.18 | 0.33 | 0.41 |
| 144363 | LYRM5 | 10 | NA | NA | NA | NA | -0.02 | 0.13 | 0.11 | -0.07 | 0.33 | 0.40 |
| 2878 | GPX3 | 10 | NA | NA | NA | NA | 0.06 | -0.08 | -0.14 | -0.16 | -0.04 | 0.44 |
| 286827 | TRIM59 | 10 | NA | NA | NA | NA | 0.04 | 0.05 | 0.04 | -0.03 | 0.22 | 0.40 |
| 2946 | GSTM2 | 10 | NA | NA | NA | NA | -0.03 | 0.02 | 0.11 | 0.02 | 0.05 | 0.39 |
| 1773 | DNASE1 | 10 | NA | NA | NA | NA | 0.10 | 0.05 | 0.12 | 0.04 | 0.24 | 0.48 |
| 10809 | STARD10 | 10 | NA | NA | NA | NA | -0.05 | 0.04 | -0.06 | 0.02 | 0.10 | 0.38 |
| 401588 | ZNF674-AS1 | 10 | NA | NA | NA | NA | -0.04 | -0.07 | -0.03 | 0.13 | 0.40 | 0.28 |
| 54753 | ZNF853 | 10 | NA | NA | NA | NA | -0.06 | 0.04 | 0.09 | 0.14 | 0.16 | 0.44 |
| 115557 | ARHGEF25 | 10 | NA | NA | NA | NA | 0.06 | 0.01 | 0.01 | 0.06 | 0.25 | 0.48 |
| 283131 | NEAT1 | 10 | NA | NA | NA | NA | -0.01 | 0.07 | 0.16 | -0.38 | 0.16 | 0.52 |
| 27239 | GPR162 | 10 | NA | NA | NA | NA | 0.02 | -0.01 | -0.02 | 0.03 | 0.06 | 0.40 |
| NA | NA | 10 | NA | NA | NA | NA | 0.04 | 0.08 | -0.05 | 0.11 | 0.00 | 0.38 |
| 378938 | MALAT1 | 10 | NA | NA | NA | NA | -0.10 | 0.12 | 0.29 | -0.43 | 0.02 | 0.29 |
| 1519 | CTSO | 10 | NA | NA | NA | NA | -0.15 | 0.01 | -0.15 | -0.03 | 0.25 | 0.38 |
| 100129550 | LOC100129550 | 10 | NA | NA | NA | NA | 0.05 | 0.01 | 0.01 | -0.08 | 0.08 | 0.41 |
| NA | NA | 10 | NA | NA | NA | NA | 0.06 | 0.11 | 0.00 | 0.06 | 0.11 | 0.41 |
| 256302 | NATD1 | 10 | NA | NA | NA | NA | 0.28 | -0.08 | 0.23 | -0.04 | 0.12 | 0.75 |
| NA | NA | 10 | NA | NA | NA | NA | 0.10 | 0.11 | 0.08 | 0.00 | 0.32 | 0.40 |
| NA | NA | 10 | NA | NA | NA | NA | -0.04 | 0.03 | 0.09 | 0.09 | 0.19 | 0.40 |
| NA | NA | 10 | NA | NA | NA | NA | -0.04 | -0.06 | 0.03 | 0.06 | 0.27 | 0.42 |
| NA | NA | 10 | NA | NA | NA | NA | -0.01 | 0.04 | 0.12 | -0.03 | 0.18 | 0.41 |

Supplementary Table 6: Genes exhibiting non-linear biphasic responses and associated cluster ID and BMD median values for low dose rate exposures.

| ENTREZID | SYMBOL | clusterID | BMDS.Model | BMD | fitPValue | AIC | D0.01 | D0.05 | D0.25 | D0.5 | D2 | D5 |
| --- | --- | --- | --- | --- | --- | --- | --- | --- | --- | --- | --- | --- |
| 283131.00 | NEAT1 | 1.00 | Poly 3 | 0.21 | 0.12 | 311.23 | -0.61 | 0.03 | 0.26 | 0.20 | 0.24 | 0.15 |
| 1387.00 | CREBBP | 1.00 | NA | NA | NA | NA | -0.52 | 0.00 | 0.19 | -0.16 | 0.05 | -0.06 |
| 4784.00 | NFIX | 1.00 | NA | NA | NA | NA | -0.45 | 0.04 | 0.34 | -0.05 | 0.03 | -0.04 |
| 30846.00 | EHD2 | 1.00 | NA | NA | NA | NA | -0.47 | 0.00 | 0.17 | -0.28 | -0.01 | -0.13 |
| 29924.00 | EPN1 | 1.00 | NA | NA | NA | NA | -0.39 | 0.03 | 0.15 | -0.15 | 0.02 | 0.00 |
| 5141.00 | PDE4A | 1.00 | NA | NA | NA | NA | -0.47 | -0.02 | 0.16 | -0.01 | 0.11 | 0.00 |
| 7030.00 | TFE3 | 1.00 | NA | NA | NA | NA | -0.40 | 0.02 | 0.11 | -0.08 | 0.05 | -0.06 |
| 7879.00 | RAB7A | 1.00 | NA | NA | NA | NA | -0.54 | 0.07 | 0.20 | -0.08 | 0.19 | -0.13 |
| 11176.00 | BAZ2A | 1.00 | NA | NA | NA | NA | -0.58 | -0.01 | 0.22 | -0.15 | 0.02 | -0.04 |
| 7145.00 | TNS1 | 1.00 | NA | NA | NA | NA | -0.41 | 0.02 | 0.28 | -0.07 | 0.09 | -0.10 |
| 22839.00 | DLGAP4 | 1.00 | NA | NA | NA | NA | -0.41 | 0.05 | 0.11 | -0.13 | 0.03 | -0.05 |
| 6932.00 | TCF7 | 1.00 | NA | NA | NA | NA | -0.47 | -0.01 | 0.23 | -0.12 | 0.07 | -0.19 |
| 54434.00 | SSH1 | 1.00 | NA | NA | NA | NA | -0.39 | 0.07 | 0.31 | 0.12 | 0.08 | -0.10 |
| 63035.00 | BCORL1 | 1.00 | NA | NA | NA | NA | -0.44 | -0.02 | 0.11 | -0.12 | 0.09 | -0.17 |
| 5829.00 | PXN | 1.00 | NA | NA | NA | NA | -0.45 | -0.03 | 0.15 | -0.12 | 0.06 | 0.00 |
| 1727.00 | CYB5R3 | 1.00 | NA | NA | NA | NA | -0.50 | 0.02 | 0.18 | -0.23 | -0.05 | -0.13 |
| 80020.00 | FOXRED2 | 1.00 | NA | NA | NA | NA | -0.39 | -0.03 | 0.12 | -0.23 | 0.12 | 0.07 |
| 2033.00 | EP300 | 1.00 | NA | NA | NA | NA | -0.45 | -0.02 | 0.16 | -0.26 | 0.24 | -0.10 |
| 23094.00 | SIPA1L3 | 1.00 | NA | NA | NA | NA | -0.54 | -0.02 | 0.21 | -0.17 | 0.06 | -0.06 |
| 835.00 | CASP2 | 1.00 | NA | NA | NA | NA | -0.45 | -0.04 | 0.17 | -0.18 | 0.01 | -0.05 |
| 2022.00 | ENG | 1.00 | NA | NA | NA | NA | -0.47 | -0.04 | 0.25 | -0.15 | 0.19 | 0.03 |
| 57178.00 | ZMIZ1 | 1.00 | NA | NA | NA | NA | -0.52 | 0.01 | 0.22 | -0.16 | 0.14 | -0.16 |
| 81619.00 | TSPAN14 | 1.00 | NA | NA | NA | NA | -0.44 | -0.08 | 0.07 | -0.19 | 0.09 | -0.14 |
| 57649.00 | PHF12 | 1.00 | NA | NA | NA | NA | -0.52 | -0.04 | 0.16 | -0.27 | 0.01 | -0.08 |
| 1822.00 | ATN1 | 1.00 | NA | NA | NA | NA | -0.55 | 0.03 | 0.07 | -0.33 | 0.24 | -0.09 |
| 22848.00 | AAK1 | 1.00 | NA | NA | NA | NA | -0.38 | -0.09 | 0.08 | -0.14 | 0.33 | -0.06 |
| 23215.00 | PRRC2C | 1.00 | NA | NA | NA | NA | -0.41 | 0.11 | 0.26 | 0.03 | 0.09 | -0.05 |
| 8289.00 | ARID1A | 1.00 | NA | NA | NA | NA | -0.44 | 0.12 | 0.35 | -0.14 | 0.25 | -0.02 |
| 4297.00 | KMT2A | 1.00 | NA | NA | NA | NA | -0.40 | 0.03 | 0.17 | -0.19 | 0.24 | -0.07 |
| 1958.00 | EGR1 | 1.00 | NA | NA | NA | NA | -0.40 | 0.11 | 0.39 | -0.09 | 0.10 | -0.19 |
| 10174.00 | SORBS3 | 1.00 | NA | NA | NA | NA | -0.50 | 0.06 | 0.32 | -0.21 | -0.02 | -0.09 |
| 57670.00 | KIAA1549 | 1.00 | NA | NA | NA | NA | -0.40 | -0.02 | 0.09 | -0.08 | 0.04 | -0.02 |
| 55809.00 | TRERF1 | 1.00 | NA | NA | NA | NA | -0.39 | 0.06 | 0.24 | -0.09 | 0.03 | -0.07 |
| 8603.00 | FAM193A | 1.00 | NA | NA | NA | NA | -0.41 | 0.03 | 0.15 | -0.14 | 0.08 | -0.05 |
| 6662.00 | SOX9 | 1.00 | NA | NA | NA | NA | -0.31 | 0.13 | 0.34 | 0.05 | 0.48 | -0.14 |
| 5326.00 | PLAGL2 | 1.00 | NA | NA | NA | NA | -0.39 | 0.07 | 0.13 | -0.10 | 0.11 | -0.06 |
| 57479.00 | PRR12 | 1.00 | NA | NA | NA | NA | -0.57 | -0.03 | 0.27 | -0.29 | 0.00 | -0.02 |
| 148022.00 | TICAM1 | 1.00 | NA | NA | NA | NA | -0.44 | 0.00 | 0.10 | -0.09 | 0.05 | -0.04 |
| 65249.00 | ZSWIM4 | 1.00 | NA | NA | NA | NA | -0.52 | -0.07 | 0.08 | -0.10 | 0.03 | -0.21 |
| 60678.00 | EEFSEC | 1.00 | NA | NA | NA | NA | -0.40 | 0.07 | 0.21 | -0.07 | -0.02 | 0.01 |
| 79595.00 | SAP130 | 1.00 | NA | NA | NA | NA | -0.48 | 0.02 | 0.18 | -0.23 | 0.05 | -0.05 |
| 6812.00 | STXBP1 | 1.00 | NA | NA | NA | NA | -0.42 | 0.04 | 0.12 | 0.01 | 0.05 | -0.02 |
| 116113.00 | FOXP4 | 1.00 | NA | NA | NA | NA | -0.63 | -0.01 | 0.19 | -0.21 | 0.04 | -0.07 |
| 9656.00 | MDC1 | 1.00 | NA | NA | NA | NA | -0.45 | 0.01 | 0.21 | -0.27 | 0.05 | -0.10 |
| 10579.00 | TACC2 | 1.00 | NA | NA | NA | NA | -0.40 | 0.00 | 0.19 | -0.20 | 0.08 | -0.01 |
| 283373.00 | ANKRD52 | 1.00 | NA | NA | NA | NA | -0.42 | -0.08 | 0.08 | -0.16 | 0.11 | -0.09 |
| 23067.00 | SETD1B | 1.00 | NA | NA | NA | NA | -0.47 | 0.08 | 0.25 | -0.11 | 0.09 | -0.02 |
| 92579.00 | G6PC3 | 1.00 | NA | NA | NA | NA | -0.40 | -0.01 | 0.13 | -0.19 | 0.01 | 0.02 |
| 396.00 | ARHGDIA | 1.00 | NA | NA | NA | NA | -0.39 | 0.11 | 0.44 | -0.30 | 0.01 | -0.07 |
| 23476.00 | BRD4 | 1.00 | NA | NA | NA | NA | -0.40 | 0.01 | 0.15 | -0.18 | 0.06 | -0.08 |
| 4782.00 | NFIC | 1.00 | NA | NA | NA | NA | -0.46 | 0.12 | 0.31 | -0.19 | 0.36 | -0.09 |
| 6391.00 | SDHC | 1.00 | NA | NA | NA | NA | -0.39 | -0.01 | 0.12 | 0.08 | 0.07 | -0.11 |
| 10262.00 | SF3B4 | 1.00 | NA | NA | NA | NA | -0.42 | 0.09 | 0.19 | -0.20 | -0.03 | -0.08 |
| 57459.00 | GATAD2B | 1.00 | NA | NA | NA | NA | -0.41 | 0.00 | 0.13 | -0.13 | 0.12 | -0.04 |
| 2052.00 | EPHX1 | 1.00 | NA | NA | NA | NA | -0.41 | -0.02 | 0.15 | -0.28 | -0.02 | -0.10 |
| 4288.00 | MKI67 | 1.00 | NA | NA | NA | NA | -0.44 | 0.13 | 0.25 | -0.04 | 0.03 | -0.07 |
| 140710.00 | SOGA1 | 1.00 | NA | NA | NA | NA | -0.42 | -0.07 | 0.03 | -0.14 | 0.08 | -0.05 |
| 80790.00 | CMIP | 1.00 | NA | NA | NA | NA | -0.58 | 0.02 | 0.25 | -0.07 | 0.09 | -0.07 |
| 57466.00 | SCAF4 | 1.00 | NA | NA | NA | NA | -0.50 | 0.15 | 0.35 | 0.03 | 0.05 | -0.04 |
| 90993.00 | CREB3L1 | 1.00 | NA | NA | NA | NA | -0.43 | 0.02 | 0.13 | -0.24 | 0.09 | -0.11 |
| 114991.00 | ZNF618 | 1.00 | NA | NA | NA | NA | -0.41 | 0.05 | 0.27 | -0.05 | 0.01 | -0.04 |
| 23387.00 | SIK3 | 1.00 | NA | NA | NA | NA | -0.41 | -0.02 | 0.10 | -0.17 | 0.04 | -0.09 |
| 23248.00 | RPRD2 | 1.00 | NA | NA | NA | NA | -0.39 | 0.07 | 0.21 | -0.18 | 0.18 | 0.01 |
| 6282.00 | S100A11 | 1.00 | NA | NA | NA | NA | -0.33 | 0.39 | 0.44 | -0.23 | 0.03 | -0.09 |
| 9640.00 | ZNF592 | 1.00 | NA | NA | NA | NA | -0.42 | 0.01 | 0.16 | -0.25 | 0.00 | -0.08 |
| 89797.00 | NAV2 | 1.00 | NA | NA | NA | NA | -0.56 | 0.00 | 0.23 | -0.12 | 0.18 | -0.01 |
| 219988.00 | PATL1 | 1.00 | NA | NA | NA | NA | -0.39 | 0.01 | 0.16 | -0.19 | 0.12 | -0.06 |
| 114785.00 | MBD6 | 1.00 | NA | NA | NA | NA | -0.50 | -0.01 | 0.07 | -0.29 | 0.15 | -0.11 |
| 56905.00 | C15orf39 | 1.00 | NA | NA | NA | NA | -0.57 | 0.01 | 0.18 | -0.25 | 0.12 | -0.14 |
| 6668.00 | SP2 | 1.00 | NA | NA | NA | NA | -0.48 | 0.11 | 0.20 | -0.23 | 0.04 | -0.15 |
| 8085.00 | KMT2D | 1.00 | NA | NA | NA | NA | -0.41 | 0.08 | 0.26 | -0.04 | 0.17 | 0.03 |
| 26005.00 | C2CD3 | 1.00 | NA | NA | NA | NA | -0.42 | -0.03 | 0.16 | -0.19 | 0.05 | -0.07 |
| 11273.00 | ATXN2L | 1.00 | NA | NA | NA | NA | -0.56 | 0.00 | 0.20 | -0.23 | 0.10 | -0.02 |
| 3054.00 | HCFC1 | 1.00 | NA | NA | NA | NA | -0.47 | 0.03 | 0.25 | -0.20 | 0.00 | -0.04 |
| 283450.00 | HECTD4 | 1.00 | NA | NA | NA | NA | -0.47 | -0.08 | 0.09 | -0.13 | 0.08 | 0.01 |
| 55731.00 | FAM222B | 1.00 | NA | NA | NA | NA | -0.67 | 0.04 | 0.22 | -0.29 | -0.02 | -0.13 |
| 10594.00 | PRPF8 | 1.00 | NA | NA | NA | NA | -0.42 | 0.08 | 0.27 | -0.02 | -0.01 | -0.03 |
| 55690.00 | PACS1 | 1.00 | NA | NA | NA | NA | -0.40 | -0.05 | 0.09 | -0.14 | 0.05 | -0.04 |
| 8815.00 | BANF1 | 1.00 | NA | NA | NA | NA | -0.41 | 0.08 | 0.27 | -0.11 | -0.05 | -0.15 |
| 8061.00 | FOSL1 | 1.00 | NA | NA | NA | NA | -0.59 | 0.02 | 0.26 | -0.36 | 0.53 | -0.07 |
| 80139.00 | ZNF703 | 1.00 | NA | NA | NA | NA | -0.39 | 0.07 | 0.30 | 0.05 | 0.18 | -0.05 |
| 283149.00 | BCL9L | 1.00 | NA | NA | NA | NA | -0.62 | -0.07 | 0.20 | -0.23 | 0.17 | -0.11 |
| 23131.00 | GPATCH8 | 1.00 | NA | NA | NA | NA | -0.38 | -0.05 | 0.12 | -0.14 | 0.02 | -0.03 |
| 85379.00 | KIAA1671 | 1.00 | NA | NA | NA | NA | -0.40 | -0.08 | 0.12 | -0.10 | 0.10 | -0.04 |
| 8831.00 | SYNGAP1 | 1.00 | NA | NA | NA | NA | -0.39 | -0.07 | 0.15 | -0.11 | 0.08 | -0.06 |
| 23054.00 | NCOA6 | 1.00 | NA | NA | NA | NA | -0.43 | 0.11 | 0.26 | -0.15 | 0.13 | -0.01 |
| 4519.00 | CYTB | 1.00 | NA | NA | NA | NA | -0.60 | 0.22 | 0.31 | -0.52 | 0.27 | -0.26 |
| 4536.00 | ND2 | 1.00 | NA | NA | NA | NA | -0.60 | 0.52 | 0.21 | -0.43 | 0.32 | -0.29 |
| 4540.00 | ND5 | 1.00 | NA | NA | NA | NA | -0.29 | 0.44 | 0.27 | -0.51 | 0.11 | -0.22 |
| 4512.00 | COX1 | 1.00 | NA | NA | NA | NA | -0.68 | 0.21 | 0.47 | -0.31 | 0.02 | -0.07 |
| 283489.00 | CHAMP1 | 1.00 | NA | NA | NA | NA | -0.45 | 0.10 | 0.32 | -0.22 | 0.28 | -0.10 |
| 4538.00 | ND4 | 1.00 | NA | NA | NA | NA | -0.56 | 0.50 | 0.25 | -0.48 | 0.10 | -0.24 |
| 4535.00 | ND1 | 1.00 | NA | NA | NA | NA | -0.60 | 0.33 | 0.02 | -0.70 | 0.30 | -0.34 |
| 4508.00 | ATP6 | 1.00 | NA | NA | NA | NA | -0.56 | 0.49 | 0.33 | -0.35 | 0.32 | -0.17 |
| 4514.00 | COX3 | 1.00 | NA | NA | NA | NA | -0.54 | 0.35 | 0.56 | -0.31 | 0.26 | 0.00 |
| 65979.00 | PHACTR4 | 1.00 | NA | NA | NA | NA | -0.51 | 0.03 | 0.20 | -0.24 | 0.00 | -0.09 |
| 5514.00 | PPP1R10 | 1.00 | NA | NA | NA | NA | -0.45 | -0.01 | 0.12 | -0.33 | 0.04 | -0.06 |
| 6311.00 | ATXN2 | 1.00 | NA | NA | NA | NA | -0.39 | 0.09 | 0.20 | -0.11 | 0.13 | -0.02 |
| 4509.00 | ATP8 | 1.00 | NA | NA | NA | NA | -0.50 | 0.36 | 0.03 | -0.24 | 0.09 | -0.35 |
| NA | NA | 1.00 | NA | NA | NA | NA | -0.45 | 0.55 | 0.27 | -0.37 | 0.25 | -0.17 |
| NA | NA | 1.00 | NA | NA | NA | NA | -0.39 | 0.04 | 0.13 | -0.14 | 0.08 | -0.04 |
| 283624.00 | LINC00641 | 1.00 | NA | NA | NA | NA | -0.38 | -0.01 | 0.05 | -0.15 | 0.03 | -0.05 |
| 57597.00 | BAHCC1 | 1.00 | NA | NA | NA | NA | -0.62 | -0.01 | 0.25 | -0.09 | 0.05 | -0.03 |
| NA | NA | 1.00 | NA | NA | NA | NA | -0.43 | -0.13 | 0.07 | -0.09 | 0.08 | -0.04 |
| 7703.00 | PCGF2 | 1.00 | NA | NA | NA | NA | -0.47 | -0.08 | 0.02 | -0.18 | 0.12 | -0.11 |
| NA | NA | 1.00 | NA | NA | NA | NA | -0.44 | 0.12 | 0.12 | -0.15 | -0.05 | -0.08 |
| 401505.00 | TOMM5 | 2.00 | NA | NA | NA | NA | 0.05 | -0.40 | -0.28 | 0.10 | -0.32 | -0.09 |
| 26832.00 | RNU5B-1 | 2.00 | NA | NA | NA | NA | 0.08 | -0.30 | -0.12 | 0.39 | 0.00 | 0.18 |
| 677840.00 | SNORA71D | 2.00 | NA | NA | NA | NA | -0.08 | -0.32 | -0.38 | 0.10 | -0.13 | -0.03 |
| 26835.00 | RNU4-1 | 2.00 | NA | NA | NA | NA | 0.07 | -0.33 | -0.45 | 0.39 | -0.15 | 0.01 |
| 6084.00 | RNY1 | 2.00 | NA | NA | NA | NA | 0.15 | -0.48 | -0.54 | 0.50 | -0.11 | 0.18 |
| 26834.00 | RNU4-2 | 2.00 | NA | NA | NA | NA | -0.01 | -0.47 | -0.61 | 0.46 | -0.22 | -0.01 |
| 677833.00 | SNORA54 | 2.00 | NA | NA | NA | NA | 0.15 | -0.53 | -0.50 | 0.41 | -0.03 | 0.15 |
| 114599.00 | SNORD15B | 2.00 | NA | NA | NA | NA | 0.39 | -0.15 | -0.24 | 0.14 | 0.04 | -0.15 |
| 677829.00 | SNORA49 | 2.00 | NA | NA | NA | NA | 0.06 | -0.31 | -0.19 | 0.41 | 0.04 | 0.14 |
| 100151684.00 | RNU6ATAC | 2.00 | NA | NA | NA | NA | -0.09 | -0.44 | -0.45 | 0.00 | -0.23 | -0.12 |
| 26777.00 | SNORA71A | 2.00 | NA | NA | NA | NA | 0.28 | -0.18 | -0.28 | 0.47 | -0.04 | 0.10 |
| 692084.00 | SNORD13 | 2.00 | NA | NA | NA | NA | 0.06 | -0.83 | -0.47 | 0.30 | -0.04 | 0.07 |
| NA | NA | 2.00 | NA | NA | NA | NA | -0.05 | -0.22 | -0.40 | 0.00 | -0.08 | -0.13 |
| 100505636.00 | LINC01024 | 2.00 | NA | NA | NA | NA | 0.01 | 0.05 | -0.42 | 0.00 | 0.08 | -0.09 |
| 677770.00 | SCARNA22 | 2.00 | NA | NA | NA | NA | 0.28 | -0.19 | -0.20 | 0.44 | -0.01 | 0.15 |
| NA | NA | 2.00 | NA | NA | NA | NA | 0.06 | -0.28 | -0.23 | 0.43 | -0.22 | 0.04 |
| NA | NA | 2.00 | NA | NA | NA | NA | 0.06 | -0.40 | -0.05 | -0.04 | -0.02 | -0.02 |
| NA | NA | 2.00 | NA | NA | NA | NA | 0.10 | -0.45 | -0.39 | 0.03 | -0.09 | 0.01 |
| NA | NA | 2.00 | NA | NA | NA | NA | -0.20 | -0.48 | -0.31 | 0.37 | -0.16 | 0.02 |
| 780851.00 | SNORD3A | 2.00 | NA | NA | NA | NA | -0.04 | -0.58 | -0.75 | 0.25 | -0.05 | -0.10 |
| NA | NA | 2.00 | NA | NA | NA | NA | 0.16 | -0.29 | 0.07 | 0.27 | -0.42 | 0.18 |
| NA | NA | 2.00 | NA | NA | NA | NA | 0.04 | -0.63 | -0.65 | 0.29 | -0.41 | -0.18 |
| 378706.00 | RN7SL2 | 2.00 | NA | NA | NA | NA | -0.01 | -0.71 | -0.68 | 0.23 | -0.30 | 0.09 |
| 59.00 | ACTA2 | 3.00 | Linear | 2.28 | 0.26 | 333.40 | 0.35 | 0.27 | 0.08 | 0.04 | -0.41 | -0.32 |
| 445.00 | ASS1 | 3.00 | Poly 2 | 0.91 | 0.34 | 213.23 | 0.25 | 0.05 | -0.08 | -0.13 | -0.54 | -0.26 |
| 1404.00 | HAPLN1 | 3.00 | Linear | 2.10 | 0.82 | 298.11 | 0.53 | 0.39 | 0.30 | 0.23 | -0.26 | -0.26 |
| 3486.00 | IGFBP3 | 3.00 | Linear | 1.70 | 0.25 | 307.24 | 0.39 | 0.43 | 0.31 | 0.22 | -0.27 | -0.21 |
| 1281.00 | COL3A1 | 3.00 | Linear | 1.80 | 0.48 | 359.05 | 0.24 | 0.21 | 0.18 | 0.11 | -0.42 | -0.27 |
| 55013.00 | CCDC109B | 3.00 | NA | NA | NA | NA | 0.38 | 0.16 | 0.08 | 0.12 | 0.12 | 0.13 |
| 51022.00 | GLRX2 | 3.00 | NA | NA | NA | NA | 0.40 | 0.19 | 0.05 | 0.18 | 0.08 | 0.11 |
| 9168.00 | TMSB10 | 3.00 | NA | NA | NA | NA | 0.42 | 0.13 | -0.02 | 0.12 | 0.03 | -0.02 |
| 55300.00 | PI4K2B | 3.00 | NA | NA | NA | NA | 0.38 | 0.21 | 0.29 | 0.23 | 0.14 | 0.17 |
| 2042.00 | EPHA3 | 3.00 | NA | NA | NA | NA | 0.52 | 0.44 | 0.35 | 0.26 | -0.05 | -0.02 |
| 5378.00 | PMS1 | 3.00 | NA | NA | NA | NA | 0.38 | 0.31 | 0.24 | 0.22 | 0.09 | 0.11 |
| 30834.00 | ZNRD1 | 3.00 | NA | NA | NA | NA | 0.41 | 0.06 | -0.01 | 0.07 | 0.04 | 0.07 |
| 7037.00 | TFRC | 3.00 | NA | NA | NA | NA | 0.40 | 0.29 | 0.25 | 0.26 | 0.09 | 0.13 |
| 10512.00 | SEMA3C | 3.00 | NA | NA | NA | NA | 0.41 | 0.23 | 0.19 | 0.22 | 0.10 | 0.06 |
| 2191.00 | FAP | 3.00 | NA | NA | NA | NA | 0.47 | 0.29 | 0.20 | 0.26 | 0.12 | 0.07 |
| 5230.00 | PGK1 | 3.00 | NA | NA | NA | NA | 0.39 | 0.13 | 0.08 | 0.10 | -0.11 | -0.07 |
| 56062.00 | KLHL4 | 3.00 | NA | NA | NA | NA | 0.41 | 0.26 | 0.35 | 0.20 | 0.10 | 0.12 |
| 857.00 | CAV1 | 3.00 | NA | NA | NA | NA | 0.39 | 0.33 | 0.30 | 0.30 | 0.09 | 0.00 |
| 6119.00 | RPA3 | 3.00 | NA | NA | NA | NA | 0.40 | 0.13 | 0.12 | 0.17 | 0.08 | 0.15 |
| 1842.00 | ECM2 | 3.00 | NA | NA | NA | NA | 0.40 | 0.32 | 0.22 | 0.09 | -0.02 | 0.20 |
| 708.00 | C1QBP | 3.00 | NA | NA | NA | NA | 0.45 | 0.15 | 0.02 | 0.17 | 0.07 | 0.04 |
| 1075.00 | CTSC | 3.00 | NA | NA | NA | NA | 0.45 | 0.28 | 0.20 | 0.24 | 0.14 | 0.06 |
| 83480.00 | PUS3 | 3.00 | NA | NA | NA | NA | 0.41 | 0.21 | 0.08 | 0.13 | -0.04 | 0.02 |
| 4121.00 | MAN1A1 | 3.00 | NA | NA | NA | NA | 0.44 | 0.28 | 0.28 | 0.24 | 0.05 | 0.08 |
| 1933.00 | EEF1B2 | 3.00 | NA | NA | NA | NA | 0.41 | 0.18 | 0.04 | 0.16 | 0.02 | -0.01 |
| 5321.00 | PLA2G4A | 3.00 | NA | NA | NA | NA | 0.41 | 0.11 | 0.04 | 0.16 | 0.18 | 0.12 |
| 10981.00 | RAB32 | 3.00 | NA | NA | NA | NA | 0.56 | 0.20 | 0.08 | 0.18 | -0.03 | -0.05 |
| 8727.00 | CTNNAL1 | 3.00 | NA | NA | NA | NA | 0.39 | 0.16 | 0.06 | 0.19 | 0.06 | -0.03 |
| 6144.00 | RPL21 | 3.00 | NA | NA | NA | NA | 0.38 | 0.07 | -0.06 | 0.11 | -0.04 | -0.03 |
| 10124.00 | ARL4A | 3.00 | NA | NA | NA | NA | 0.42 | 0.23 | 0.13 | 0.27 | 0.14 | 0.13 |
| 5552.00 | SRGN | 3.00 | NA | NA | NA | NA | 0.44 | 0.14 | 0.14 | 0.23 | 0.38 | 0.22 |
| 10549.00 | PRDX4 | 3.00 | NA | NA | NA | NA | 0.49 | 0.17 | 0.04 | 0.15 | 0.04 | 0.00 |
| 10396.00 | ATP8A1 | 3.00 | NA | NA | NA | NA | 0.39 | 0.18 | 0.13 | 0.15 | 0.11 | 0.14 |
| 10799.00 | RPP40 | 3.00 | NA | NA | NA | NA | 0.44 | 0.28 | 0.17 | 0.24 | 0.10 | 0.08 |
| 9521.00 | EEF1E1 | 3.00 | NA | NA | NA | NA | 0.41 | 0.25 | 0.26 | 0.24 | 0.20 | 0.14 |
| 6155.00 | RPL27 | 3.00 | NA | NA | NA | NA | 0.39 | 0.15 | 0.05 | 0.19 | 0.03 | 0.06 |
| 91298.00 | C12orf29 | 3.00 | NA | NA | NA | NA | 0.42 | 0.18 | 0.08 | 0.15 | 0.06 | 0.04 |
| 28969.00 | BZW2 | 3.00 | NA | NA | NA | NA | 0.39 | 0.23 | 0.12 | 0.17 | -0.02 | -0.04 |
| 6194.00 | RPS6 | 3.00 | NA | NA | NA | NA | 0.40 | 0.06 | -0.06 | 0.08 | 0.01 | -0.01 |
| 51187.00 | RSL24D1 | 3.00 | NA | NA | NA | NA | 0.40 | 0.12 | 0.03 | 0.09 | -0.03 | 0.07 |
| 306.00 | ANXA3 | 3.00 | NA | NA | NA | NA | 0.41 | 0.23 | 0.13 | 0.20 | 0.09 | 0.02 |
| 11010.00 | GLIPR1 | 3.00 | NA | NA | NA | NA | 0.42 | 0.29 | 0.23 | 0.23 | 0.16 | 0.04 |
| 4060.00 | LUM | 3.00 | NA | NA | NA | NA | 0.44 | 0.24 | 0.17 | 0.22 | 0.09 | -0.09 |
| 7168.00 | TPM1 | 3.00 | NA | NA | NA | NA | 0.39 | 0.34 | 0.18 | 0.23 | -0.08 | -0.03 |
| 494143.00 | CHAC2 | 3.00 | NA | NA | NA | NA | 0.41 | 0.11 | 0.09 | 0.12 | 0.22 | 0.06 |
| 6637.00 | SNRPG | 3.00 | NA | NA | NA | NA | 0.38 | 0.12 | -0.02 | 0.13 | 0.01 | 0.09 |
| 185.00 | AGTR1 | 3.00 | NA | NA | NA | NA | 0.42 | 0.30 | 0.26 | 0.15 | 0.11 | 0.04 |
| 6189.00 | RPS3A | 3.00 | NA | NA | NA | NA | 0.44 | 0.05 | -0.06 | 0.07 | 0.02 | -0.01 |
| 51397.00 | COMMD10 | 3.00 | NA | NA | NA | NA | 0.40 | 0.11 | 0.09 | 0.14 | 0.05 | 0.09 |
| 6581.00 | SLC22A3 | 3.00 | NA | NA | NA | NA | 0.36 | 0.40 | 0.32 | 0.15 | -0.17 | 0.02 |
| 133.00 | ADM | 3.00 | NA | NA | NA | NA | 0.51 | 0.31 | 0.27 | 0.42 | 0.24 | -0.04 |
| 11098.00 | PRSS23 | 3.00 | NA | NA | NA | NA | 0.39 | 0.22 | 0.15 | 0.23 | 0.05 | -0.04 |
| 5651.00 | TMPRSS15 | 3.00 | NA | NA | NA | NA | 0.40 | 0.26 | 0.22 | 0.26 | -0.15 | -0.12 |
| 84365.00 | NIFK | 3.00 | NA | NA | NA | NA | 0.39 | 0.26 | 0.13 | 0.22 | 0.02 | -0.02 |
| 200916.00 | RPL22L1 | 3.00 | NA | NA | NA | NA | 0.53 | 0.30 | 0.24 | 0.33 | 0.10 | 0.17 |
| 3015.00 | H2AFZ | 3.00 | NA | NA | NA | NA | 0.38 | 0.11 | 0.08 | 0.12 | 0.02 | 0.04 |
| 3600.00 | IL15 | 3.00 | NA | NA | NA | NA | 0.40 | 0.31 | 0.24 | 0.17 | 0.13 | 0.04 |
| 91942.00 | NDUFAF2 | 3.00 | NA | NA | NA | NA | 0.47 | 0.28 | 0.21 | 0.25 | 0.09 | 0.08 |
| 115908.00 | CTHRC1 | 3.00 | NA | NA | NA | NA | 0.44 | 0.22 | 0.15 | 0.18 | 0.04 | -0.10 |
| 9200.00 | HACD1 | 3.00 | NA | NA | NA | NA | 0.39 | 0.18 | 0.12 | 0.20 | 0.03 | 0.05 |
| 4837.00 | NNMT | 3.00 | NA | NA | NA | NA | 0.47 | 0.20 | 0.07 | 0.17 | -0.05 | -0.10 |
| 6201.00 | RPS7 | 3.00 | NA | NA | NA | NA | 0.38 | 0.08 | -0.02 | 0.10 | 0.00 | -0.01 |
| 26472.00 | PPP1R14B | 3.00 | NA | NA | NA | NA | 0.39 | 0.20 | 0.14 | 0.22 | 0.07 | 0.03 |
| 1466.00 | CSRP2 | 3.00 | NA | NA | NA | NA | 0.47 | 0.14 | 0.01 | 0.17 | 0.02 | 0.00 |
| 9134.00 | CCNE2 | 3.00 | NA | NA | NA | NA | 0.43 | 0.27 | 0.21 | 0.23 | 0.10 | 0.10 |
| 389336.00 | C5orf46 | 3.00 | NA | NA | NA | NA | 0.52 | 0.30 | 0.09 | 0.19 | -0.15 | -0.14 |
| 8334.00 | HIST1H2AC | 3.00 | NA | NA | NA | NA | 0.56 | 0.31 | 0.25 | 0.31 | 0.11 | 0.24 |
| 5464.00 | PPA1 | 3.00 | NA | NA | NA | NA | 0.41 | 0.17 | 0.10 | 0.15 | 0.11 | 0.07 |
| 4869.00 | NPM1 | 3.00 | NA | NA | NA | NA | 0.41 | 0.24 | 0.09 | 0.16 | 0.00 | -0.02 |
| 92815.00 | HIST3H2A | 3.00 | NA | NA | NA | NA | 0.44 | 0.13 | 0.15 | 0.23 | 0.19 | 0.20 |
| 6218.00 | RPS17 | 3.00 | NA | NA | NA | NA | 0.39 | 0.15 | 0.06 | 0.12 | 0.01 | 0.04 |
| 83943.00 | IMMP2L | 3.00 | NA | NA | NA | NA | 0.38 | 0.20 | 0.18 | 0.13 | 0.06 | 0.08 |
| 392636.00 | AGMO | 3.00 | NA | NA | NA | NA | 0.40 | 0.18 | 0.10 | -0.01 | 0.19 | 0.17 |
| 54510.00 | PCDH18 | 3.00 | NA | NA | NA | NA | 0.45 | 0.25 | 0.24 | 0.21 | 0.16 | 0.03 |
| 6275.00 | S100A4 | 3.00 | NA | NA | NA | NA | 0.41 | 0.03 | 0.02 | 0.21 | 0.27 | 0.04 |
| NA | NA | 3.00 | NA | NA | NA | NA | 0.39 | 0.21 | 0.30 | 0.33 | 0.02 | 0.04 |
| 6277.00 | S100A6 | 3.00 | NA | NA | NA | NA | 0.47 | 0.15 | 0.11 | 0.27 | 0.22 | 0.11 |
| 199692.00 | ZNF627 | 3.00 | NA | NA | NA | NA | 0.39 | 0.06 | -0.05 | 0.06 | -0.01 | 0.00 |
| 58505.00 | OSTC | 3.00 | NA | NA | NA | NA | 0.40 | 0.16 | 0.08 | 0.16 | 0.01 | -0.01 |
| 29902.00 | FAM216A | 3.00 | NA | NA | NA | NA | 0.39 | 0.12 | 0.03 | 0.12 | 0.02 | 0.00 |
| 7114.00 | TMSB4X | 3.00 | NA | NA | NA | NA | 0.45 | 0.18 | 0.09 | 0.23 | -0.09 | -0.07 |
| 677800.00 | SNORA12 | 3.00 | NA | NA | NA | NA | 0.34 | -0.06 | -0.17 | 0.39 | 0.04 | 0.14 |
| NA | NA | 3.00 | NA | NA | NA | NA | 0.50 | 0.28 | 0.25 | 0.33 | 0.22 | 0.24 |
| 101929484.00 | LINC01615 | 3.00 | NA | NA | NA | NA | 0.43 | 0.28 | 0.24 | 0.31 | 0.19 | -0.02 |
| 207107.00 | SFTA1P | 3.00 | NA | NA | NA | NA | 0.44 | 0.20 | 0.10 | 0.27 | 0.05 | -0.04 |
| 100506835.00 | LINC00840 | 3.00 | NA | NA | NA | NA | 0.40 | 0.30 | 0.15 | 0.11 | 0.21 | 0.02 |
| 6222.00 | RPS18 | 3.00 | NA | NA | NA | NA | 0.45 | 0.04 | -0.05 | 0.09 | 0.01 | 0.01 |
| 285958.00 | SNHG15 | 3.00 | NA | NA | NA | NA | 0.39 | 0.18 | 0.09 | 0.18 | 0.06 | 0.02 |
| NA | NA | 3.00 | NA | NA | NA | NA | 0.41 | 0.11 | 0.09 | 0.10 | 0.08 | 0.07 |
| 2938.00 | GSTA1 | 3.00 | NA | NA | NA | NA | 0.44 | 0.36 | 0.20 | 0.20 | -0.15 | -0.14 |
| NA | NA | 3.00 | NA | NA | NA | NA | 0.40 | 0.21 | 0.10 | 0.38 | 0.00 | 0.17 |
| 8346.00 | HIST1H2BI | 3.00 | NA | NA | NA | NA | 0.43 | 0.28 | 0.18 | 0.23 | -0.03 | 0.13 |
| NA | NA | 3.00 | NA | NA | NA | NA | 0.39 | 0.16 | 0.16 | 0.33 | -0.04 | 0.20 |
| NA | NA | 3.00 | NA | NA | NA | NA | 0.42 | 0.49 | -0.12 | -0.49 | -0.50 | -0.21 |
| 58525.00 | WIZ | 4.00 | NA | NA | NA | NA | -0.53 | -0.03 | 0.17 | -0.17 | -0.20 | 0.05 |
| 23144.00 | ZC3H3 | 4.00 | NA | NA | NA | NA | -0.46 | 0.04 | 0.15 | -0.03 | -0.08 | 0.04 |
| 7077.00 | TIMP2 | 4.00 | NA | NA | NA | NA | -0.47 | 0.04 | 0.22 | -0.08 | -0.05 | -0.06 |
| 602.00 | BCL3 | 4.00 | NA | NA | NA | NA | -0.51 | -0.07 | 0.13 | -0.25 | -0.09 | -0.15 |
| 4335.00 | MNT | 4.00 | NA | NA | NA | NA | -0.55 | -0.08 | 0.21 | -0.11 | -0.04 | -0.17 |
| 9448.00 | MAP4K4 | 4.00 | NA | NA | NA | NA | -0.40 | 0.03 | 0.18 | -0.06 | -0.07 | 0.01 |
| 2011.00 | MARK2 | 4.00 | NA | NA | NA | NA | -0.54 | -0.09 | 0.09 | -0.25 | -0.16 | -0.04 |
| 5362.00 | PLXNA2 | 4.00 | NA | NA | NA | NA | -0.41 | -0.01 | 0.26 | -0.04 | -0.01 | 0.04 |
| 57455.00 | REXO1 | 4.00 | NA | NA | NA | NA | -0.47 | -0.03 | 0.13 | -0.16 | -0.05 | 0.01 |
| 23152.00 | CIC | 4.00 | NA | NA | NA | NA | -0.54 | -0.01 | 0.21 | -0.20 | -0.10 | -0.03 |
| 2037.00 | EPB41L2 | 4.00 | NA | NA | NA | NA | -0.45 | 0.09 | 0.22 | 0.06 | -0.21 | -0.14 |
| 23139.00 | MAST2 | 4.00 | NA | NA | NA | NA | -0.39 | 0.04 | 0.14 | -0.01 | -0.11 | -0.06 |
| 4849.00 | CNOT3 | 4.00 | NA | NA | NA | NA | -0.54 | 0.07 | 0.34 | -0.11 | -0.08 | -0.05 |
| 8570.00 | KHSRP | 4.00 | NA | NA | NA | NA | -0.38 | 0.02 | 0.19 | -0.04 | -0.01 | -0.04 |
| 57655.00 | GRAMD1A | 4.00 | NA | NA | NA | NA | -0.40 | -0.04 | 0.10 | -0.07 | -0.24 | -0.04 |
| 51291.00 | GMIP | 4.00 | NA | NA | NA | NA | -0.40 | -0.14 | 0.09 | -0.09 | -0.08 | 0.02 |
| 10726.00 | NUDC | 4.00 | NA | NA | NA | NA | -0.42 | 0.07 | 0.22 | -0.04 | -0.31 | -0.02 |
| 64857.00 | PLEKHG2 | 4.00 | NA | NA | NA | NA | -0.43 | 0.02 | 0.11 | -0.14 | -0.07 | -0.09 |
| 26523.00 | AGO1 | 4.00 | NA | NA | NA | NA | -0.40 | -0.06 | 0.07 | -0.14 | -0.05 | -0.07 |
| 2289.00 | FKBP5 | 4.00 | NA | NA | NA | NA | -0.39 | 0.08 | 0.32 | -0.06 | -0.31 | -0.12 |
| 23031.00 | MAST3 | 4.00 | NA | NA | NA | NA | -0.50 | -0.06 | 0.19 | -0.10 | -0.22 | -0.05 |
| 9739.00 | SETD1A | 4.00 | NA | NA | NA | NA | -0.58 | 0.02 | 0.30 | -0.17 | -0.13 | -0.03 |
| 9524.00 | TECR | 4.00 | NA | NA | NA | NA | -0.46 | -0.02 | 0.16 | -0.11 | -0.17 | -0.15 |
| 29801.00 | ZDHHC8 | 4.00 | NA | NA | NA | NA | -0.48 | -0.02 | 0.18 | -0.15 | -0.30 | 0.00 |
| 51586.00 | MED15 | 4.00 | NA | NA | NA | NA | -0.39 | -0.05 | 0.13 | -0.12 | -0.11 | -0.05 |
| 4605.00 | MYBL2 | 4.00 | NA | NA | NA | NA | -0.45 | 0.10 | 0.25 | -0.22 | -0.32 | -0.10 |
| 11237.00 | RNF24 | 4.00 | NA | NA | NA | NA | -0.43 | 0.01 | 0.17 | -0.11 | -0.02 | -0.06 |
| 10398.00 | MYL9 | 4.00 | NA | NA | NA | NA | -0.33 | 0.11 | 0.43 | -0.32 | -0.21 | -0.17 |
| 116092.00 | DNTTIP1 | 4.00 | NA | NA | NA | NA | -0.39 | 0.00 | 0.06 | -0.09 | -0.19 | -0.10 |
| 2245.00 | FGD1 | 4.00 | NA | NA | NA | NA | -0.48 | 0.04 | 0.18 | -0.08 | -0.20 | 0.03 |
| 55697.00 | VAC14 | 4.00 | NA | NA | NA | NA | -0.40 | -0.01 | 0.14 | -0.23 | -0.07 | -0.05 |
| 6810.00 | STX4 | 4.00 | NA | NA | NA | NA | -0.42 | -0.14 | 0.07 | 0.01 | -0.16 | 0.00 |
| 1209.00 | CLPTM1 | 4.00 | NA | NA | NA | NA | -0.54 | -0.04 | 0.18 | -0.22 | -0.20 | 0.06 |
| 84444.00 | DOT1L | 4.00 | NA | NA | NA | NA | -0.50 | 0.00 | 0.19 | -0.10 | -0.27 | -0.10 |
| 8175.00 | SF3A2 | 4.00 | NA | NA | NA | NA | -0.56 | 0.01 | 0.11 | -0.22 | -0.16 | -0.06 |
| 22870.00 | PPP6R1 | 4.00 | NA | NA | NA | NA | -0.41 | -0.07 | 0.06 | -0.06 | -0.05 | -0.01 |
| 26093.00 | CCDC9 | 4.00 | NA | NA | NA | NA | -0.54 | -0.07 | 0.20 | -0.10 | -0.41 | -0.11 |
| 11100.00 | HNRNPUL1 | 4.00 | NA | NA | NA | NA | -0.49 | 0.02 | 0.17 | -0.26 | -0.12 | -0.05 |
| 10945.00 | KDELR1 | 4.00 | NA | NA | NA | NA | -0.40 | -0.05 | 0.09 | -0.17 | -0.11 | -0.06 |
| 64748.00 | PLPPR2 | 4.00 | NA | NA | NA | NA | -0.43 | -0.05 | 0.07 | -0.21 | -0.22 | -0.09 |
| 57664.00 | PLEKHA4 | 4.00 | NA | NA | NA | NA | -0.44 | -0.12 | 0.07 | -0.01 | -0.23 | -0.14 |
| 3315.00 | HSPB1 | 4.00 | NA | NA | NA | NA | -0.52 | 0.05 | 0.27 | -0.14 | -0.38 | -0.17 |
| 165.00 | AEBP1 | 4.00 | NA | NA | NA | NA | -0.42 | -0.05 | 0.21 | -0.08 | -0.10 | 0.03 |
| 8729.00 | GBF1 | 4.00 | NA | NA | NA | NA | -0.42 | -0.05 | 0.09 | -0.17 | -0.08 | -0.01 |
| 51684.00 | SUFU | 4.00 | NA | NA | NA | NA | -0.43 | -0.11 | 0.17 | -0.05 | -0.09 | -0.03 |
| 23125.00 | CAMTA2 | 4.00 | NA | NA | NA | NA | -0.41 | 0.03 | 0.09 | -0.20 | -0.07 | -0.04 |
| 10743.00 | RAI1 | 4.00 | NA | NA | NA | NA | -0.50 | -0.01 | 0.25 | -0.08 | -0.09 | -0.06 |
| 84687.00 | PPP1R9B | 4.00 | NA | NA | NA | NA | -0.43 | -0.08 | 0.02 | -0.08 | -0.06 | -0.07 |
| 4621.00 | MYH3 | 4.00 | NA | NA | NA | NA | -0.20 | 0.01 | 0.03 | -0.05 | -0.44 | -0.37 |
| 6830.00 | SUPT6H | 4.00 | NA | NA | NA | NA | -0.45 | 0.03 | 0.17 | -0.02 | -0.10 | -0.02 |
| 8567.00 | MADD | 4.00 | NA | NA | NA | NA | -0.39 | -0.07 | 0.05 | -0.17 | -0.06 | 0.05 |
| 8914.00 | TIMELESS | 4.00 | NA | NA | NA | NA | -0.46 | -0.04 | 0.21 | -0.04 | -0.18 | -0.02 |
| 57666.00 | FBRSL1 | 4.00 | NA | NA | NA | NA | -0.43 | 0.01 | 0.24 | -0.12 | -0.20 | -0.04 |
| 1294.00 | COL7A1 | 4.00 | NA | NA | NA | NA | -0.39 | -0.06 | 0.06 | 0.04 | -0.12 | 0.04 |
| 80325.00 | ABTB1 | 4.00 | NA | NA | NA | NA | -0.44 | -0.12 | 0.00 | 0.08 | -0.05 | -0.01 |
| 3925.00 | STMN1 | 4.00 | NA | NA | NA | NA | -0.09 | 0.10 | 0.07 | -0.19 | -0.51 | -0.05 |
| 5930.00 | RBBP6 | 4.00 | NA | NA | NA | NA | -0.38 | 0.08 | 0.18 | -0.06 | -0.10 | -0.02 |
| 79903.00 | NAA60 | 4.00 | NA | NA | NA | NA | -0.39 | 0.12 | 0.23 | 0.05 | -0.23 | -0.09 |
| 83637.00 | ZMIZ2 | 4.00 | NA | NA | NA | NA | -0.63 | -0.03 | 0.15 | -0.24 | -0.16 | -0.06 |
| 745.00 | MYRF | 4.00 | NA | NA | NA | NA | -0.52 | -0.02 | 0.12 | -0.10 | -0.03 | -0.09 |
| 83596.00 | BCL2L12 | 4.00 | NA | NA | NA | NA | -0.42 | -0.08 | 0.10 | -0.21 | -0.55 | -0.08 |
| 58506.00 | SCAF1 | 4.00 | NA | NA | NA | NA | -0.42 | -0.12 | 0.07 | -0.15 | -0.17 | -0.08 |
| 84662.00 | GLIS2 | 4.00 | NA | NA | NA | NA | -0.39 | 0.05 | 0.20 | 0.04 | -0.19 | -0.03 |
| 27245.00 | AHDC1 | 4.00 | NA | NA | NA | NA | -0.57 | 0.00 | 0.38 | -0.19 | -0.10 | -0.11 |
| 6597.00 | SMARCA4 | 4.00 | NA | NA | NA | NA | -0.44 | 0.04 | 0.20 | -0.15 | -0.15 | 0.00 |
| 23030.00 | KDM4B | 4.00 | NA | NA | NA | NA | -0.49 | -0.10 | 0.04 | -0.12 | -0.28 | -0.14 |
| 7538.00 | ZFP36 | 4.00 | NA | NA | NA | NA | -0.42 | -0.06 | 0.17 | -0.29 | -0.09 | -0.09 |
| 57153.00 | SLC44A2 | 4.00 | NA | NA | NA | NA | -0.43 | -0.03 | 0.08 | -0.21 | -0.28 | -0.04 |
| 5589.00 | PRKCSH | 4.00 | NA | NA | NA | NA | -0.34 | -0.02 | 0.18 | -0.16 | -0.45 | -0.04 |
| 9667.00 | SAFB2 | 4.00 | NA | NA | NA | NA | -0.44 | -0.01 | 0.18 | 0.02 | -0.28 | -0.11 |
| 4298.00 | MLLT1 | 4.00 | NA | NA | NA | NA | -0.48 | 0.04 | 0.24 | -0.13 | -0.18 | -0.03 |
| 55201.00 | MAP1S | 4.00 | NA | NA | NA | NA | -0.51 | -0.05 | 0.22 | -0.16 | -0.39 | -0.03 |
| 10298.00 | PAK4 | 4.00 | NA | NA | NA | NA | -0.62 | -0.12 | 0.13 | -0.21 | -0.31 | -0.13 |
| 6874.00 | TAF4 | 4.00 | NA | NA | NA | NA | -0.39 | 0.05 | 0.21 | -0.04 | -0.03 | -0.04 |
| 3911.00 | LAMA5 | 4.00 | NA | NA | NA | NA | -0.53 | -0.11 | 0.17 | -0.07 | -0.21 | -0.13 |
| 84726.00 | PRRC2B | 4.00 | NA | NA | NA | NA | -0.45 | 0.06 | 0.24 | -0.08 | -0.19 | -0.01 |
| 23211.00 | ZC3H4 | 4.00 | NA | NA | NA | NA | -0.53 | -0.04 | 0.19 | -0.19 | -0.28 | -0.01 |
| 55558.00 | PLXNA3 | 4.00 | NA | NA | NA | NA | -0.52 | -0.03 | 0.19 | -0.09 | -0.17 | -0.08 |
| 6627.00 | SNRPA1 | 4.00 | NA | NA | NA | NA | -0.43 | 0.10 | 0.24 | -0.09 | -0.25 | -0.12 |
| 5989.00 | RFX1 | 4.00 | NA | NA | NA | NA | -0.53 | -0.07 | 0.15 | -0.17 | -0.18 | -0.07 |
| 4678.00 | NASP | 4.00 | NA | NA | NA | NA | -0.38 | 0.02 | 0.13 | 0.09 | -0.21 | -0.05 |
| 55748.00 | CNDP2 | 4.00 | NA | NA | NA | NA | -0.35 | 0.13 | 0.34 | -0.13 | -0.38 | 0.03 |
| 8553.00 | BHLHE40 | 4.00 | NA | NA | NA | NA | -0.47 | 0.06 | 0.19 | -0.10 | -0.29 | -0.18 |
| 6272.00 | SORT1 | 4.00 | NA | NA | NA | NA | -0.45 | -0.07 | 0.06 | -0.04 | 0.00 | -0.14 |
| 8565.00 | YARS | 4.00 | NA | NA | NA | NA | -0.17 | 0.04 | 0.10 | -0.19 | -0.38 | 0.02 |
| 4440.00 | MSI1 | 4.00 | NA | NA | NA | NA | -0.39 | -0.05 | 0.11 | -0.18 | -0.12 | -0.12 |
| 55122.00 | AKIRIN2 | 4.00 | NA | NA | NA | NA | -0.41 | 0.08 | 0.12 | 0.00 | -0.13 | -0.03 |
| 80727.00 | TTYH3 | 4.00 | NA | NA | NA | NA | -0.60 | -0.12 | 0.16 | -0.25 | -0.11 | -0.09 |
| 55833.00 | UBAP2 | 4.00 | NA | NA | NA | NA | -0.42 | 0.02 | 0.17 | -0.04 | -0.07 | -0.01 |
| 4926.00 | NUMA1 | 4.00 | NA | NA | NA | NA | -0.46 | -0.10 | 0.02 | -0.11 | -0.26 | -0.02 |
| 23168.00 | RTF1 | 4.00 | NA | NA | NA | NA | -0.39 | 0.02 | 0.11 | -0.05 | -0.05 | -0.09 |
| 9611.00 | NCOR1 | 4.00 | NA | NA | NA | NA | -0.38 | 0.00 | 0.10 | -0.11 | -0.05 | -0.05 |
| 27043.00 | PELP1 | 4.00 | NA | NA | NA | NA | -0.42 | -0.08 | 0.11 | -0.20 | -0.37 | 0.02 |
| 50488.00 | MINK1 | 4.00 | NA | NA | NA | NA | -0.38 | -0.07 | 0.07 | -0.15 | -0.01 | -0.04 |
| 1453.00 | CSNK1D | 4.00 | NA | NA | NA | NA | -0.40 | 0.04 | 0.18 | 0.14 | -0.12 | -0.10 |
| 3339.00 | HSPG2 | 4.00 | NA | NA | NA | NA | -0.39 | 0.12 | 0.37 | -0.06 | -0.35 | -0.18 |
| 1952.00 | CELSR2 | 4.00 | NA | NA | NA | NA | -0.46 | -0.07 | 0.15 | -0.12 | -0.10 | -0.06 |
| 5546.00 | PRCC | 4.00 | NA | NA | NA | NA | -0.45 | 0.02 | 0.23 | -0.17 | -0.09 | -0.03 |
| 57530.00 | CGN | 4.00 | NA | NA | NA | NA | -0.41 | -0.08 | -0.02 | 0.01 | -0.12 | -0.03 |
| 54507.00 | ADAMTSL4 | 4.00 | NA | NA | NA | NA | -0.47 | -0.07 | 0.12 | -0.22 | -0.34 | -0.28 |
| 9898.00 | UBAP2L | 4.00 | NA | NA | NA | NA | -0.44 | -0.02 | 0.09 | -0.16 | -0.03 | -0.09 |
| 23020.00 | SNRNP200 | 4.00 | NA | NA | NA | NA | -0.39 | 0.01 | 0.27 | 0.00 | -0.16 | 0.00 |
| 22838.00 | RNF44 | 4.00 | NA | NA | NA | NA | -0.60 | -0.15 | 0.11 | -0.18 | -0.12 | -0.03 |
| 25792.00 | CIZ1 | 4.00 | NA | NA | NA | NA | -0.57 | 0.00 | 0.19 | -0.23 | -0.16 | 0.02 |
| 9919.00 | SEC16A | 4.00 | NA | NA | NA | NA | -0.41 | 0.05 | 0.25 | -0.11 | -0.11 | -0.03 |
| 4851.00 | NOTCH1 | 4.00 | NA | NA | NA | NA | -0.48 | -0.13 | 0.12 | -0.16 | -0.23 | -0.03 |
| 85456.00 | TNKS1BP1 | 4.00 | NA | NA | NA | NA | -0.49 | 0.04 | 0.26 | -0.06 | -0.30 | -0.08 |
| 9231.00 | DLG5 | 4.00 | NA | NA | NA | NA | -0.46 | -0.09 | 0.05 | -0.14 | -0.14 | -0.07 |
| 54842.00 | MFSD6 | 4.00 | NA | NA | NA | NA | -0.38 | -0.05 | 0.04 | -0.16 | -0.12 | -0.06 |
| 9531.00 | BAG3 | 4.00 | NA | NA | NA | NA | -0.48 | -0.08 | 0.18 | -0.17 | -0.22 | -0.02 |
| 10160.00 | FARP1 | 4.00 | NA | NA | NA | NA | -0.44 | 0.04 | 0.23 | -0.07 | -0.11 | -0.06 |
| 124402.00 | UBALD1 | 4.00 | NA | NA | NA | NA | -0.45 | -0.06 | 0.06 | -0.09 | -0.08 | -0.04 |
| 80028.00 | FBXL18 | 4.00 | NA | NA | NA | NA | -0.42 | -0.05 | 0.15 | -0.10 | -0.24 | 0.00 |
| 60685.00 | ZFAND3 | 4.00 | NA | NA | NA | NA | -0.49 | 0.00 | 0.16 | -0.02 | -0.07 | -0.10 |
| 23648.00 | SSBP3 | 4.00 | NA | NA | NA | NA | -0.47 | 0.02 | 0.25 | -0.03 | -0.09 | -0.10 |
| 121665.00 | SPPL3 | 4.00 | NA | NA | NA | NA | -0.38 | 0.01 | 0.17 | -0.01 | -0.09 | 0.02 |
| 6497.00 | SKI | 4.00 | NA | NA | NA | NA | -0.51 | 0.02 | 0.22 | -0.09 | -0.07 | -0.05 |
| 124245.00 | ZC3H18 | 4.00 | NA | NA | NA | NA | -0.49 | 0.04 | 0.26 | -0.03 | -0.29 | -0.01 |
| 5681.00 | PSKH1 | 4.00 | NA | NA | NA | NA | -0.39 | -0.07 | 0.03 | 0.02 | 0.02 | -0.05 |
| 7791.00 | ZYX | 4.00 | NA | NA | NA | NA | -0.46 | 0.12 | 0.34 | -0.12 | -0.19 | -0.10 |
| 29.00 | ABR | 4.00 | NA | NA | NA | NA | -0.38 | -0.09 | 0.07 | -0.09 | -0.09 | 0.00 |
| 126526.00 | C19orf47 | 4.00 | NA | NA | NA | NA | -0.39 | -0.02 | 0.03 | -0.16 | -0.10 | -0.03 |
| 10712.00 | FAM189B | 4.00 | NA | NA | NA | NA | -0.52 | -0.02 | 0.23 | 0.06 | -0.04 | -0.01 |
| 125950.00 | RAVER1 | 4.00 | NA | NA | NA | NA | -0.55 | -0.06 | 0.22 | -0.19 | -0.11 | -0.06 |
| 10482.00 | NXF1 | 4.00 | NA | NA | NA | NA | -0.51 | -0.04 | 0.13 | -0.30 | -0.15 | -0.07 |
| 57190.00 | SEPN1 | 4.00 | NA | NA | NA | NA | -0.54 | -0.04 | 0.13 | -0.24 | -0.07 | -0.05 |
| 476.00 | ATP1A1 | 4.00 | NA | NA | NA | NA | -0.47 | 0.11 | 0.46 | -0.12 | -0.41 | 0.00 |
| 83860.00 | TAF3 | 4.00 | NA | NA | NA | NA | -0.53 | 0.09 | 0.22 | -0.02 | -0.23 | 0.03 |
| 8642.00 | DCHS1 | 4.00 | NA | NA | NA | NA | -0.39 | -0.05 | -0.03 | -0.14 | -0.31 | -0.10 |
| 6764.00 | ST5 | 4.00 | NA | NA | NA | NA | -0.42 | -0.05 | 0.06 | -0.16 | -0.17 | -0.09 |
| 2801.00 | GOLGA2 | 4.00 | NA | NA | NA | NA | -0.39 | -0.08 | 0.02 | -0.04 | -0.23 | -0.01 |
| 90007.00 | MIDN | 4.00 | NA | NA | NA | NA | -0.50 | -0.09 | 0.22 | -0.01 | -0.07 | -0.09 |
| 29123.00 | ANKRD11 | 4.00 | NA | NA | NA | NA | -0.52 | 0.11 | 0.33 | 0.02 | -0.13 | 0.03 |
| 114823.00 | LENG8 | 4.00 | NA | NA | NA | NA | -0.57 | -0.07 | 0.09 | -0.08 | -0.15 | 0.00 |
| 7536.00 | SF1 | 4.00 | NA | NA | NA | NA | -0.40 | 0.05 | 0.23 | -0.13 | -0.14 | -0.05 |
| 81844.00 | TRIM56 | 4.00 | NA | NA | NA | NA | -0.41 | -0.04 | 0.11 | -0.05 | -0.09 | 0.02 |
| 8019.00 | BRD3 | 4.00 | NA | NA | NA | NA | -0.42 | 0.07 | 0.33 | 0.03 | -0.17 | -0.02 |
| 57555.00 | NLGN2 | 4.00 | NA | NA | NA | NA | -0.64 | -0.19 | 0.17 | -0.17 | -0.08 | -0.07 |
| 1107.00 | CHD3 | 4.00 | NA | NA | NA | NA | -0.47 | 0.04 | 0.18 | 0.01 | -0.21 | 0.00 |
| 58485.00 | TRAPPC1 | 4.00 | NA | NA | NA | NA | -0.50 | 0.11 | 0.25 | -0.18 | -0.20 | -0.17 |
| 24149.00 | ZNF318 | 4.00 | NA | NA | NA | NA | -0.43 | -0.01 | 0.09 | -0.21 | -0.08 | -0.03 |
| 22883.00 | CLSTN1 | 4.00 | NA | NA | NA | NA | -0.39 | -0.05 | 0.08 | -0.03 | -0.13 | -0.11 |
| 11346.00 | SYNPO | 4.00 | NA | NA | NA | NA | -0.48 | 0.02 | 0.34 | -0.10 | -0.18 | -0.17 |
| 126308.00 | MOB3A | 4.00 | NA | NA | NA | NA | -0.41 | -0.02 | 0.12 | -0.17 | -0.04 | -0.13 |
| 5970.00 | RELA | 4.00 | NA | NA | NA | NA | -0.41 | -0.01 | 0.12 | -0.20 | -0.10 | -0.10 |
| 79102.00 | RNF26 | 4.00 | NA | NA | NA | NA | -0.49 | -0.07 | 0.12 | -0.10 | -0.07 | -0.08 |
| 5306.00 | PITPNA | 4.00 | NA | NA | NA | NA | -0.42 | -0.03 | 0.12 | -0.22 | -0.19 | -0.03 |
| 64837.00 | KLC2 | 4.00 | NA | NA | NA | NA | -0.44 | -0.07 | 0.03 | -0.07 | 0.01 | 0.02 |
| 392.00 | ARHGAP1 | 4.00 | NA | NA | NA | NA | -0.42 | 0.04 | 0.18 | -0.08 | -0.22 | 0.00 |
| 10025.00 | MED16 | 4.00 | NA | NA | NA | NA | -0.38 | -0.11 | 0.08 | -0.13 | -0.29 | 0.03 |
| 391.00 | RHOG | 4.00 | NA | NA | NA | NA | -0.40 | 0.01 | 0.16 | -0.08 | -0.16 | -0.08 |
| 8408.00 | ULK1 | 4.00 | NA | NA | NA | NA | -0.58 | -0.07 | 0.15 | -0.21 | -0.16 | -0.04 |
| 57104.00 | PNPLA2 | 4.00 | NA | NA | NA | NA | -0.55 | -0.05 | 0.12 | -0.09 | -0.20 | -0.06 |
| 6666.00 | SOX12 | 4.00 | NA | NA | NA | NA | -0.40 | -0.03 | 0.28 | -0.22 | -0.12 | -0.07 |
| 51341.00 | ZBTB7A | 4.00 | NA | NA | NA | NA | -0.46 | -0.06 | 0.19 | -0.13 | -0.06 | -0.06 |
| 80169.00 | CTC1 | 4.00 | NA | NA | NA | NA | -0.50 | -0.04 | 0.11 | -0.13 | -0.20 | -0.02 |
| 93621.00 | MRFAP1 | 4.00 | NA | NA | NA | NA | -0.44 | 0.01 | 0.13 | -0.09 | -0.19 | -0.14 |
| 80153.00 | EDC3 | 4.00 | NA | NA | NA | NA | -0.44 | -0.01 | 0.27 | -0.01 | -0.15 | -0.02 |
| 9582.00 | APOBEC3B | 4.00 | NA | NA | NA | NA | -0.28 | 0.01 | 0.09 | -0.21 | -0.40 | -0.03 |
| 91663.00 | MYADM | 4.00 | NA | NA | NA | NA | -0.69 | 0.02 | 0.27 | -0.20 | -0.11 | -0.18 |
| 22928.00 | SEPHS2 | 4.00 | NA | NA | NA | NA | -0.40 | 0.01 | 0.21 | 0.16 | -0.06 | -0.09 |
| 23060.00 | ZNF609 | 4.00 | NA | NA | NA | NA | -0.42 | -0.05 | 0.06 | -0.17 | -0.02 | -0.07 |
| 286128.00 | ZFP41 | 4.00 | NA | NA | NA | NA | -0.39 | -0.06 | 0.06 | -0.11 | -0.20 | 0.02 |
| 84967.00 | LSM10 | 4.00 | NA | NA | NA | NA | -0.40 | -0.01 | 0.39 | -0.07 | -0.37 | -0.12 |
| 84629.00 | TNRC18 | 4.00 | NA | NA | NA | NA | -0.47 | 0.02 | 0.24 | -0.07 | -0.21 | -0.03 |
| 23336.00 | SYNM | 4.00 | NA | NA | NA | NA | -0.40 | 0.01 | 0.14 | 0.06 | -0.07 | 0.04 |
| 633.00 | BGN | 4.00 | NA | NA | NA | NA | -0.57 | 0.10 | 0.31 | -0.17 | -0.17 | -0.13 |
| 10766.00 | TOB2 | 4.00 | NA | NA | NA | NA | -0.42 | -0.03 | 0.10 | -0.13 | -0.12 | -0.10 |
| 79640.00 | C22orf46 | 4.00 | NA | NA | NA | NA | -0.51 | -0.04 | 0.20 | 0.13 | -0.11 | 0.02 |
| 9230.00 | RAB11B | 4.00 | NA | NA | NA | NA | -0.41 | 0.00 | 0.20 | -0.05 | -0.04 | -0.05 |
| 727910.00 | TLCD2 | 4.00 | NA | NA | NA | NA | -0.42 | -0.09 | 0.00 | -0.04 | -0.18 | -0.07 |
| 23396.00 | PIP5K1C | 4.00 | NA | NA | NA | NA | -0.51 | -0.03 | 0.17 | -0.12 | -0.02 | -0.07 |
| 146909.00 | KIF18B | 4.00 | NA | NA | NA | NA | -0.56 | -0.08 | 0.11 | -0.20 | -0.26 | -0.08 |
| 53373.00 | TPCN1 | 4.00 | NA | NA | NA | NA | -0.38 | 0.00 | 0.26 | -0.09 | -0.04 | -0.04 |
| 10614.00 | HEXIM1 | 4.00 | NA | NA | NA | NA | -0.39 | 0.05 | 0.26 | 0.05 | -0.19 | 0.05 |
| 399687.00 | MYO18A | 4.00 | NA | NA | NA | NA | -0.46 | -0.06 | 0.10 | -0.08 | -0.28 | -0.03 |
| 399909.00 | PCNX3 | 4.00 | NA | NA | NA | NA | -0.45 | -0.05 | 0.10 | -0.13 | -0.12 | 0.00 |
| 89887.00 | ZNF628 | 4.00 | NA | NA | NA | NA | -0.51 | -0.10 | 0.07 | -0.12 | -0.07 | 0.01 |
| 6709.00 | SPTAN1 | 4.00 | NA | NA | NA | NA | -0.40 | 0.01 | 0.10 | -0.08 | -0.16 | -0.08 |
| 221527.00 | ZBTB12 | 4.00 | NA | NA | NA | NA | -0.45 | -0.06 | 0.06 | 0.05 | -0.27 | -0.10 |
| 7916.00 | PRRC2A | 4.00 | NA | NA | NA | NA | -0.59 | -0.04 | 0.20 | -0.24 | -0.12 | -0.03 |
| 84335.00 | AKT1S1 | 4.00 | NA | NA | NA | NA | -0.52 | -0.01 | 0.24 | -0.09 | -0.25 | -0.05 |
| 100131017.00 | ZNF316 | 4.00 | NA | NA | NA | NA | -0.43 | -0.12 | 0.13 | -0.03 | -0.29 | -0.06 |
| 51157.00 | ZNF580 | 4.00 | NA | NA | NA | NA | -0.45 | -0.02 | 0.19 | -0.19 | -0.11 | -0.02 |
| 113178.00 | SCAMP4 | 4.00 | NA | NA | NA | NA | -0.52 | -0.07 | 0.18 | -0.32 | -0.09 | -0.09 |
| NA | NA | 4.00 | NA | NA | NA | NA | -0.40 | 0.03 | 0.17 | -0.06 | -0.09 | 0.13 |
| 6892.00 | TAPBP | 4.00 | NA | NA | NA | NA | -0.40 | -0.03 | 0.12 | -0.12 | -0.19 | 0.00 |
| 5297.00 | PI4KA | 4.00 | NA | NA | NA | NA | -0.47 | -0.08 | 0.15 | -0.21 | -0.19 | -0.05 |
| NA | NA | 4.00 | NA | NA | NA | NA | -0.43 | -0.10 | 0.10 | -0.09 | -0.10 | -0.08 |
| 27350.00 | APOBEC3C | 4.00 | NA | NA | NA | NA | -0.65 | -0.09 | 0.13 | -0.33 | -0.24 | -0.01 |
| 984.00 | CDK11B | 4.00 | NA | NA | NA | NA | -0.45 | 0.04 | 0.25 | -0.05 | -0.39 | 0.00 |
| 83481.00 | EPPK1 | 4.00 | NA | NA | NA | NA | -0.40 | -0.01 | 0.20 | 0.01 | -0.27 | -0.29 |
| 100507290.00 | ZNF865 | 4.00 | NA | NA | NA | NA | -0.40 | -0.03 | 0.15 | -0.08 | -0.09 | 0.03 |
| 140735.00 | DYNLL2 | 4.00 | NA | NA | NA | NA | -0.54 | -0.06 | 0.14 | -0.10 | -0.22 | 0.01 |
| 9757.00 | KMT2B | 4.00 | NA | NA | NA | NA | -0.59 | -0.06 | 0.24 | -0.20 | -0.11 | -0.05 |
| NA | NA | 4.00 | NA | NA | NA | NA | -0.44 | -0.04 | 0.04 | -0.05 | -0.12 | 0.06 |
| 157285.00 | SGK223 | 4.00 | NA | NA | NA | NA | -0.54 | 0.02 | 0.24 | -0.12 | -0.18 | -0.08 |
| 57636.00 | ARHGAP23 | 4.00 | NA | NA | NA | NA | -0.48 | -0.05 | 0.17 | -0.21 | -0.06 | -0.08 |
| NA | NA | 4.00 | NA | NA | NA | NA | -0.44 | -0.04 | 0.05 | -0.05 | -0.04 | -0.09 |
| NA | NA | 4.00 | NA | NA | NA | NA | -0.48 | -0.01 | 0.15 | -0.10 | -0.03 | 0.03 |
| NA | NA | 4.00 | NA | NA | NA | NA | -0.41 | -0.06 | 0.00 | -0.02 | -0.02 | -0.04 |
| NA | NA | 4.00 | NA | NA | NA | NA | -0.38 | 0.02 | 0.08 | -0.17 | -0.09 | -0.12 |
| NA | NA | 4.00 | NA | NA | NA | NA | -0.47 | 0.05 | 0.14 | -0.04 | -0.30 | -0.12 |
| 23338.00 | JADE2 | 5.00 | Linear | 0.97 | 0.29 | 160.28 | -0.41 | -0.32 | -0.19 | -0.19 | 0.13 | 0.04 |
| 50804.00 | MYEF2 | 5.00 | Hill | 0.30 | 0.46 | 221.02 | -0.61 | -0.18 | 0.01 | -0.11 | 0.04 | 0.01 |
| 115703.00 | ARHGAP33 | 5.00 | NA | NA | NA | NA | -0.46 | -0.09 | -0.03 | -0.25 | -0.13 | -0.09 |
| 57787.00 | MARK4 | 5.00 | NA | NA | NA | NA | -0.61 | -0.23 | -0.02 | -0.30 | -0.13 | -0.13 |
| 7005.00 | TEAD3 | 5.00 | NA | NA | NA | NA | -0.40 | -0.12 | 0.01 | -0.10 | -0.03 | -0.08 |
| 9918.00 | NCAPD2 | 5.00 | NA | NA | NA | NA | -0.45 | -0.20 | -0.09 | -0.32 | -0.20 | -0.11 |
| 10460.00 | TACC3 | 5.00 | NA | NA | NA | NA | -0.61 | -0.15 | 0.03 | -0.17 | -0.28 | -0.17 |
| 2896.00 | GRN | 5.00 | NA | NA | NA | NA | -0.44 | -0.16 | -0.01 | -0.25 | -0.24 | -0.02 |
| 79567.00 | FAM65A | 5.00 | NA | NA | NA | NA | -0.47 | -0.18 | 0.03 | -0.29 | 0.18 | -0.15 |
| 9563.00 | H6PD | 5.00 | NA | NA | NA | NA | -0.39 | -0.22 | -0.12 | -0.18 | -0.18 | -0.07 |
| 9498.00 | SLC4A8 | 5.00 | NA | NA | NA | NA | -0.42 | -0.27 | -0.18 | -0.23 | 0.00 | -0.21 |
| 55771.00 | PRR11 | 5.00 | NA | NA | NA | NA | -0.40 | -0.22 | -0.16 | -0.37 | -0.11 | -0.14 |
| 375449.00 | MAST4 | 5.00 | NA | NA | NA | NA | -0.49 | -0.16 | -0.03 | -0.29 | 0.19 | 0.02 |
| 5566.00 | PRKACA | 5.00 | NA | NA | NA | NA | -0.51 | -0.17 | 0.00 | -0.44 | 0.19 | -0.19 |
| 51512.00 | GTSE1 | 5.00 | NA | NA | NA | NA | -0.43 | -0.17 | -0.17 | -0.17 | -0.12 | -0.13 |
| 25930.00 | PTPN23 | 5.00 | NA | NA | NA | NA | -0.44 | -0.10 | 0.08 | -0.26 | 0.05 | -0.08 |
| 56949.00 | XAB2 | 5.00 | NA | NA | NA | NA | -0.44 | -0.12 | -0.01 | -0.27 | 0.09 | -0.15 |
| 6813.00 | STXBP2 | 5.00 | NA | NA | NA | NA | -0.40 | -0.07 | -0.05 | -0.10 | -0.19 | -0.07 |
| 4791.00 | NFKB2 | 5.00 | NA | NA | NA | NA | -0.49 | -0.27 | -0.05 | -0.32 | -0.09 | -0.12 |
| 58476.00 | TP53INP2 | 5.00 | NA | NA | NA | NA | -0.52 | -0.19 | -0.03 | -0.23 | 0.20 | -0.07 |
| 3797.00 | KIF3C | 5.00 | NA | NA | NA | NA | -0.48 | -0.10 | 0.05 | -0.19 | -0.02 | -0.10 |
| 22924.00 | MAPRE3 | 5.00 | NA | NA | NA | NA | -0.40 | -0.07 | -0.14 | 0.01 | 0.00 | -0.01 |
| 22974.00 | TPX2 | 5.00 | NA | NA | NA | NA | -0.42 | -0.21 | -0.13 | -0.40 | -0.18 | -0.13 |
| 2036.00 | EPB41L1 | 5.00 | NA | NA | NA | NA | -0.47 | -0.15 | -0.09 | -0.37 | 0.02 | -0.24 |
| 57506.00 | MAVS | 5.00 | NA | NA | NA | NA | -0.46 | -0.18 | -0.04 | -0.22 | -0.09 | -0.04 |
| 6548.00 | SLC9A1 | 5.00 | NA | NA | NA | NA | -0.72 | -0.27 | 0.08 | -0.27 | -0.06 | -0.06 |
| 27154.00 | BRPF3 | 5.00 | NA | NA | NA | NA | -0.47 | -0.10 | 0.02 | -0.20 | 0.07 | -0.10 |
| 23616.00 | SH3BP1 | 5.00 | NA | NA | NA | NA | -0.41 | -0.17 | -0.01 | -0.20 | 0.00 | -0.10 |
| 23331.00 | TTC28 | 5.00 | NA | NA | NA | NA | -0.39 | -0.12 | 0.00 | -0.12 | -0.08 | -0.06 |
| 9609.00 | RAB36 | 5.00 | NA | NA | NA | NA | -0.45 | -0.28 | -0.25 | -0.24 | -0.11 | -0.18 |
| 23492.00 | CBX7 | 5.00 | NA | NA | NA | NA | -0.63 | -0.32 | -0.22 | -0.22 | -0.17 | -0.05 |
| 9766.00 | SUSD6 | 5.00 | NA | NA | NA | NA | -0.51 | -0.24 | -0.13 | -0.35 | -0.05 | -0.08 |
| 994.00 | CDC25B | 5.00 | NA | NA | NA | NA | -0.46 | -0.19 | -0.04 | -0.27 | -0.09 | -0.07 |
| 8237.00 | USP11 | 5.00 | NA | NA | NA | NA | -0.38 | -0.14 | -0.06 | -0.12 | -0.22 | -0.07 |
| 23295.00 | MGRN1 | 5.00 | NA | NA | NA | NA | -0.51 | -0.10 | 0.06 | -0.22 | -0.04 | -0.02 |
| 51285.00 | RASL12 | 5.00 | NA | NA | NA | NA | -0.13 | -0.24 | -0.17 | -0.22 | -0.38 | -0.23 |
| 1760.00 | DMPK | 5.00 | NA | NA | NA | NA | -0.41 | -0.27 | -0.14 | -0.13 | -0.14 | -0.10 |
| 81857.00 | MED25 | 5.00 | NA | NA | NA | NA | -0.44 | -0.14 | -0.02 | -0.23 | -0.23 | -0.09 |
| 9149.00 | DYRK1B | 5.00 | NA | NA | NA | NA | -0.41 | -0.30 | -0.16 | -0.29 | -0.06 | -0.08 |
| 25865.00 | PRKD2 | 5.00 | NA | NA | NA | NA | -0.42 | -0.15 | -0.02 | -0.13 | -0.13 | -0.01 |
| 5802.00 | PTPRS | 5.00 | NA | NA | NA | NA | -0.41 | -0.18 | -0.02 | -0.22 | -0.04 | -0.14 |
| 9545.00 | RAB3D | 5.00 | NA | NA | NA | NA | -0.53 | -0.19 | 0.04 | -0.01 | 0.05 | -0.10 |
| 23373.00 | CRTC1 | 5.00 | NA | NA | NA | NA | -0.52 | -0.19 | 0.05 | -0.23 | -0.32 | -0.11 |
| 2931.00 | GSK3A | 5.00 | NA | NA | NA | NA | -0.42 | -0.09 | 0.04 | -0.28 | 0.08 | -0.07 |
| 199731.00 | CADM4 | 5.00 | NA | NA | NA | NA | -0.41 | -0.16 | -0.13 | -0.10 | -0.22 | -0.22 |
| 64598.00 | MOSPD3 | 5.00 | NA | NA | NA | NA | -0.49 | -0.18 | -0.10 | -0.24 | -0.17 | -0.13 |
| 7016.00 | TESK1 | 5.00 | NA | NA | NA | NA | -0.40 | -0.14 | -0.07 | -0.23 | -0.10 | -0.05 |
| 28964.00 | GIT1 | 5.00 | NA | NA | NA | NA | -0.49 | -0.13 | 0.00 | -0.24 | -0.07 | -0.02 |
| 4355.00 | MPP2 | 5.00 | NA | NA | NA | NA | -0.39 | -0.14 | -0.05 | -0.19 | -0.11 | -0.11 |
| 1949.00 | EFNB3 | 5.00 | NA | NA | NA | NA | -0.39 | -0.21 | -0.12 | -0.34 | 0.04 | -0.12 |
| 54868.00 | TMEM104 | 5.00 | NA | NA | NA | NA | -0.39 | -0.11 | 0.01 | -0.14 | -0.08 | 0.01 |
| 23130.00 | ATG2A | 5.00 | NA | NA | NA | NA | -0.47 | -0.18 | -0.01 | -0.21 | -0.12 | 0.04 |
| 5002.00 | SLC22A18 | 5.00 | NA | NA | NA | NA | -0.38 | -0.14 | -0.13 | -0.09 | -0.22 | -0.08 |
| 23371.00 | TNS2 | 5.00 | NA | NA | NA | NA | -0.42 | -0.10 | 0.02 | -0.19 | -0.14 | -0.05 |
| 2305.00 | FOXM1 | 5.00 | NA | NA | NA | NA | -0.48 | -0.08 | 0.04 | -0.28 | -0.08 | -0.04 |
| 54682.00 | MANSC1 | 5.00 | NA | NA | NA | NA | -0.42 | -0.26 | -0.16 | -0.30 | 0.06 | -0.10 |
| 5869.00 | RAB5B | 5.00 | NA | NA | NA | NA | -0.40 | -0.23 | -0.14 | -0.30 | -0.01 | -0.12 |
| 5467.00 | PPARD | 5.00 | NA | NA | NA | NA | -0.52 | -0.16 | 0.08 | -0.19 | -0.08 | -0.01 |
| 1746.00 | DLX2 | 5.00 | NA | NA | NA | NA | -0.67 | -0.12 | 0.03 | -0.26 | -0.18 | 0.00 |
| 4209.00 | MEF2D | 5.00 | NA | NA | NA | NA | -0.68 | -0.21 | 0.08 | -0.27 | 0.10 | -0.17 |
| 5493.00 | PPL | 5.00 | NA | NA | NA | NA | -0.53 | -0.41 | -0.18 | -0.11 | -0.36 | -0.21 |
| 8013.00 | NR4A3 | 5.00 | NA | NA | NA | NA | -0.53 | -0.29 | -0.09 | -0.30 | -0.12 | -0.17 |
| 11113.00 | CIT | 5.00 | NA | NA | NA | NA | -0.55 | -0.19 | -0.08 | -0.28 | -0.11 | -0.13 |
| 3164.00 | NR4A1 | 5.00 | NA | NA | NA | NA | -0.49 | -0.21 | -0.08 | -0.29 | -0.29 | -0.14 |
| 399512.00 | SLC25A35 | 5.00 | NA | NA | NA | NA | -0.55 | -0.15 | -0.07 | -0.26 | -0.08 | -0.07 |
| 79144.00 | PPDPF | 5.00 | NA | NA | NA | NA | -0.39 | -0.06 | 0.06 | -0.32 | -0.18 | -0.23 |
| 83541.00 | FAM110A | 5.00 | NA | NA | NA | NA | -0.38 | -0.19 | -0.22 | -0.25 | -0.09 | -0.01 |
| 79924.00 | ADM2 | 5.00 | NA | NA | NA | NA | -0.42 | -0.18 | 0.02 | -0.39 | -0.23 | 0.04 |
| 55930.00 | MYO5C | 5.00 | NA | NA | NA | NA | -0.45 | -0.22 | -0.05 | -0.22 | -0.13 | -0.09 |
| 6462.00 | SHBG | 5.00 | NA | NA | NA | NA | -0.25 | -0.39 | -0.11 | -0.15 | -0.17 | -0.04 |
| 9754.00 | STARD8 | 5.00 | NA | NA | NA | NA | -0.41 | -0.20 | -0.16 | -0.27 | -0.18 | -0.04 |
| 57572.00 | DOCK6 | 5.00 | NA | NA | NA | NA | -0.44 | -0.10 | 0.11 | -0.21 | -0.01 | -0.08 |
| 1264.00 | CNN1 | 5.00 | NA | NA | NA | NA | -0.03 | -0.03 | -0.12 | -0.15 | -0.38 | -0.35 |
| 148229.00 | ATP8B3 | 5.00 | NA | NA | NA | NA | -0.40 | -0.17 | -0.08 | -0.22 | -0.15 | -0.11 |
| 23199.00 | GSE1 | 5.00 | NA | NA | NA | NA | -0.56 | -0.16 | 0.02 | -0.30 | -0.06 | -0.14 |
| 5914.00 | RARA | 5.00 | NA | NA | NA | NA | -0.56 | -0.12 | 0.08 | -0.31 | -0.17 | -0.09 |
| 54862.00 | CC2D1A | 5.00 | NA | NA | NA | NA | -0.39 | -0.16 | 0.04 | -0.31 | -0.07 | -0.03 |
| 3691.00 | ITGB4 | 5.00 | NA | NA | NA | NA | -0.49 | -0.27 | -0.18 | -0.30 | -0.32 | -0.25 |
| 23558.00 | WBP2 | 5.00 | NA | NA | NA | NA | -0.59 | -0.16 | 0.08 | -0.29 | -0.20 | 0.03 |
| 23135.00 | KDM6B | 5.00 | NA | NA | NA | NA | -0.55 | -0.08 | 0.04 | -0.28 | 0.07 | -0.16 |
| 114904.00 | C1QTNF6 | 5.00 | NA | NA | NA | NA | -0.44 | -0.27 | -0.04 | -0.26 | -0.11 | -0.18 |
| 84722.00 | PSRC1 | 5.00 | NA | NA | NA | NA | -0.33 | -0.23 | -0.21 | -0.39 | -0.21 | -0.17 |
| 377.00 | ARF3 | 5.00 | NA | NA | NA | NA | -0.41 | -0.11 | -0.01 | -0.15 | -0.15 | -0.10 |
| 55143.00 | CDCA8 | 5.00 | NA | NA | NA | NA | -0.41 | -0.18 | -0.05 | -0.33 | -0.32 | -0.10 |
| 747.00 | DAGLA | 5.00 | NA | NA | NA | NA | -0.47 | -0.09 | 0.03 | -0.18 | -0.17 | -0.06 |
| 84900.00 | RNFT2 | 5.00 | NA | NA | NA | NA | -0.51 | -0.26 | -0.21 | -0.29 | -0.11 | -0.06 |
| 3679.00 | ITGA7 | 5.00 | NA | NA | NA | NA | -0.45 | -0.23 | -0.12 | -0.13 | -0.19 | -0.15 |
| 23148.00 | NACAD | 5.00 | NA | NA | NA | NA | -0.61 | -0.13 | 0.05 | -0.24 | 0.07 | -0.23 |
| 85446.00 | ZFHX2 | 5.00 | NA | NA | NA | NA | -0.38 | -0.14 | 0.05 | -0.09 | 0.04 | -0.13 |
| 11173.00 | ADAMTS7 | 5.00 | NA | NA | NA | NA | -0.43 | -0.29 | -0.11 | -0.25 | -0.08 | -0.03 |
| 10238.00 | DCAF7 | 5.00 | NA | NA | NA | NA | -0.40 | -0.10 | -0.01 | -0.31 | -0.12 | -0.13 |
| 153090.00 | DAB2IP | 5.00 | NA | NA | NA | NA | -0.42 | -0.12 | -0.06 | -0.28 | 0.09 | -0.09 |
| 51754.00 | TMEM8B | 5.00 | NA | NA | NA | NA | -0.43 | -0.17 | -0.10 | -0.16 | 0.01 | 0.05 |
| 93643.00 | TJAP1 | 5.00 | NA | NA | NA | NA | -0.41 | -0.17 | -0.06 | -0.24 | -0.19 | -0.04 |
| 2615.00 | LRRC32 | 5.00 | NA | NA | NA | NA | -0.40 | -0.10 | -0.04 | -0.14 | -0.26 | -0.27 |
| 9746.00 | CLSTN3 | 5.00 | NA | NA | NA | NA | -0.49 | -0.26 | -0.14 | -0.21 | -0.24 | -0.13 |
| 6843.00 | VAMP1 | 5.00 | NA | NA | NA | NA | -0.56 | -0.30 | -0.22 | -0.33 | -0.18 | -0.09 |
| 5045.00 | FURIN | 5.00 | NA | NA | NA | NA | -0.39 | -0.09 | 0.00 | -0.09 | 0.08 | 0.00 |
| 8844.00 | KSR1 | 5.00 | NA | NA | NA | NA | -0.45 | -0.15 | -0.22 | -0.28 | -0.09 | -0.08 |
| 1291.00 | COL6A1 | 5.00 | NA | NA | NA | NA | -0.45 | -0.15 | 0.06 | -0.18 | -0.15 | 0.01 |
| 23038.00 | WDTC1 | 5.00 | NA | NA | NA | NA | -0.48 | -0.24 | -0.13 | -0.36 | -0.15 | -0.04 |
| 1893.00 | ECM1 | 5.00 | NA | NA | NA | NA | -0.44 | -0.17 | 0.10 | -0.34 | 0.08 | 0.02 |
| 90226.00 | UCN2 | 5.00 | NA | NA | NA | NA | -0.45 | -0.25 | -0.25 | -0.23 | -0.15 | -0.08 |
| 222663.00 | SCUBE3 | 5.00 | NA | NA | NA | NA | -0.45 | -0.24 | -0.25 | -0.24 | -0.04 | -0.06 |
| 90060.00 | CCDC120 | 5.00 | NA | NA | NA | NA | -0.55 | -0.22 | 0.07 | -0.31 | -0.03 | -0.17 |
| 726.00 | CAPN5 | 5.00 | NA | NA | NA | NA | -0.38 | -0.16 | -0.02 | -0.12 | 0.00 | 0.06 |
| 3619.00 | INCENP | 5.00 | NA | NA | NA | NA | -0.60 | -0.17 | -0.01 | -0.25 | -0.34 | -0.05 |
| 3798.00 | KIF5A | 5.00 | NA | NA | NA | NA | -0.44 | -0.20 | -0.21 | -0.15 | -0.03 | -0.06 |
| 91748.00 | ELMSAN1 | 5.00 | NA | NA | NA | NA | -0.60 | -0.07 | 0.09 | -0.25 | -0.01 | -0.18 |
| 5603.00 | MAPK13 | 5.00 | NA | NA | NA | NA | -0.40 | -0.18 | -0.13 | 0.01 | -0.06 | 0.02 |
| 64319.00 | FBRS | 5.00 | NA | NA | NA | NA | -0.51 | -0.19 | 0.01 | -0.38 | -0.04 | -0.11 |
| 81544.00 | GDPD5 | 5.00 | NA | NA | NA | NA | -0.45 | -0.30 | -0.18 | -0.30 | -0.16 | -0.14 |
| 2039.00 | DMTN | 5.00 | NA | NA | NA | NA | -0.61 | -0.28 | -0.09 | -0.29 | 0.00 | -0.03 |
| 9900.00 | SV2A | 5.00 | NA | NA | NA | NA | -0.47 | -0.21 | -0.07 | -0.28 | -0.02 | -0.06 |
| 146206.00 | RLTPR | 5.00 | NA | NA | NA | NA | -0.45 | -0.14 | -0.11 | -0.18 | -0.07 | -0.04 |
| 149076.00 | ZNF362 | 5.00 | NA | NA | NA | NA | -0.46 | -0.13 | 0.05 | -0.30 | -0.07 | -0.11 |
| 92799.00 | SHKBP1 | 5.00 | NA | NA | NA | NA | -0.48 | -0.16 | 0.06 | -0.27 | -0.21 | -0.08 |
| 10444.00 | ZER1 | 5.00 | NA | NA | NA | NA | -0.40 | -0.19 | -0.07 | -0.17 | -0.18 | 0.00 |
| 200186.00 | CRTC2 | 5.00 | NA | NA | NA | NA | -0.58 | -0.14 | 0.04 | -0.38 | -0.01 | -0.17 |
| 9673.00 | SLC25A44 | 5.00 | NA | NA | NA | NA | -0.39 | -0.10 | 0.03 | -0.20 | -0.08 | -0.10 |
| 112939.00 | NACC1 | 5.00 | NA | NA | NA | NA | -0.43 | -0.15 | -0.03 | -0.23 | -0.09 | -0.11 |
| 9794.00 | MAML1 | 5.00 | NA | NA | NA | NA | -0.44 | -0.11 | 0.08 | -0.22 | -0.14 | -0.09 |
| 1857.00 | DVL3 | 5.00 | NA | NA | NA | NA | -0.39 | -0.09 | 0.02 | -0.21 | -0.02 | -0.06 |
| 25946.00 | ZNF385A | 5.00 | NA | NA | NA | NA | -0.66 | -0.20 | -0.10 | -0.32 | 0.16 | -0.14 |
| 113026.00 | PLCD3 | 5.00 | NA | NA | NA | NA | -0.38 | -0.12 | -0.04 | -0.18 | -0.07 | -0.06 |
| 84447.00 | SYVN1 | 5.00 | NA | NA | NA | NA | -0.47 | -0.16 | 0.11 | -0.24 | -0.06 | -0.07 |
| 57648.00 | KIAA1522 | 5.00 | NA | NA | NA | NA | -0.47 | -0.24 | 0.03 | -0.30 | 0.05 | -0.14 |
| 23385.00 | NCSTN | 5.00 | NA | NA | NA | NA | -0.31 | -0.14 | -0.01 | -0.38 | 0.05 | -0.12 |
| 57216.00 | VANGL2 | 5.00 | NA | NA | NA | NA | -0.58 | -0.16 | -0.03 | -0.26 | -0.09 | -0.10 |
| 81788.00 | NUAK2 | 5.00 | NA | NA | NA | NA | -0.39 | -0.13 | -0.14 | -0.19 | 0.02 | -0.22 |
| 5364.00 | PLXNB1 | 5.00 | NA | NA | NA | NA | -0.41 | -0.21 | -0.13 | -0.19 | -0.27 | -0.17 |
| 6297.00 | SALL2 | 5.00 | NA | NA | NA | NA | -0.53 | -0.11 | -0.02 | -0.32 | -0.05 | -0.14 |
| 53349.00 | ZFYVE1 | 5.00 | NA | NA | NA | NA | -0.41 | -0.25 | -0.13 | -0.26 | -0.15 | -0.10 |
| 26287.00 | ANKRD2 | 5.00 | NA | NA | NA | NA | -0.10 | -0.03 | -0.11 | -0.13 | -0.42 | -0.19 |
| 4239.00 | MFAP4 | 5.00 | NA | NA | NA | NA | -0.33 | -0.20 | -0.19 | -0.44 | -0.57 | -0.28 |
| 5347.00 | PLK1 | 5.00 | NA | NA | NA | NA | -0.69 | -0.29 | -0.08 | -0.48 | -0.37 | -0.15 |
| 81628.00 | TSC22D4 | 5.00 | NA | NA | NA | NA | -0.39 | -0.20 | -0.07 | -0.25 | -0.08 | -0.04 |
| 4130.00 | MAP1A | 5.00 | NA | NA | NA | NA | -0.65 | -0.20 | 0.04 | -0.33 | 0.02 | -0.09 |
| 399665.00 | FAM102A | 5.00 | NA | NA | NA | NA | -0.41 | -0.11 | -0.07 | -0.20 | -0.03 | -0.08 |
| 57701.00 | NCKAP5L | 5.00 | NA | NA | NA | NA | -0.59 | -0.22 | 0.00 | -0.31 | -0.26 | -0.08 |
| 148137.00 | PROSER3 | 5.00 | NA | NA | NA | NA | -0.53 | -0.14 | 0.04 | -0.23 | -0.10 | -0.13 |
| 51129.00 | ANGPTL4 | 5.00 | NA | NA | NA | NA | -0.43 | -0.31 | -0.19 | -0.06 | 0.04 | -0.30 |
| 2125.00 | EVPL | 5.00 | NA | NA | NA | NA | -0.49 | -0.18 | -0.03 | -0.05 | -0.21 | 0.02 |
| 4054.00 | LTBP3 | 5.00 | NA | NA | NA | NA | -0.60 | -0.27 | 0.06 | -0.20 | -0.34 | -0.19 |
| 28511.00 | NKIRAS2 | 5.00 | NA | NA | NA | NA | -0.46 | -0.09 | 0.06 | -0.29 | -0.20 | -0.03 |
| 165904.00 | XIRP1 | 5.00 | NA | NA | NA | NA | -0.43 | -0.30 | -0.05 | -0.11 | -0.10 | -0.36 |
| 80346.00 | REEP4 | 5.00 | NA | NA | NA | NA | -0.46 | -0.06 | -0.04 | -0.27 | -0.12 | -0.06 |
| 22809.00 | ATF5 | 5.00 | NA | NA | NA | NA | -0.59 | -0.10 | 0.00 | -0.20 | -0.03 | -0.13 |
| 5272.00 | SERPINB9 | 5.00 | NA | NA | NA | NA | -0.44 | -0.26 | -0.17 | -0.28 | -0.02 | -0.11 |
| 55561.00 | CDC42BPG | 5.00 | NA | NA | NA | NA | -0.42 | -0.34 | -0.23 | -0.12 | -0.21 | -0.03 |
| 57571.00 | CARNS1 | 5.00 | NA | NA | NA | NA | -0.39 | -0.30 | -0.19 | -0.24 | -0.22 | -0.10 |
| 54961.00 | SSH3 | 5.00 | NA | NA | NA | NA | -0.42 | -0.10 | -0.05 | -0.19 | -0.14 | -0.08 |
| 8824.00 | CES2 | 5.00 | NA | NA | NA | NA | -0.39 | -0.29 | -0.19 | -0.21 | -0.13 | -0.03 |
| 91683.00 | SYT12 | 5.00 | NA | NA | NA | NA | -0.44 | -0.31 | -0.18 | -0.15 | -0.38 | -0.46 |
| 4973.00 | OLR1 | 5.00 | NA | NA | NA | NA | -0.07 | -0.04 | -0.12 | -0.06 | -0.16 | -0.44 |
| 1605.00 | DAG1 | 5.00 | NA | NA | NA | NA | -0.39 | -0.09 | 0.10 | -0.23 | -0.04 | -0.11 |
| 3728.00 | JUP | 5.00 | NA | NA | NA | NA | -0.65 | -0.19 | -0.04 | -0.38 | -0.29 | -0.26 |
| 1263.00 | PLK3 | 5.00 | NA | NA | NA | NA | -0.44 | -0.20 | -0.13 | -0.27 | 0.00 | 0.00 |
| 57659.00 | ZBTB4 | 5.00 | NA | NA | NA | NA | -0.39 | -0.10 | 0.00 | -0.16 | -0.04 | -0.07 |
| 26470.00 | SEZ6L2 | 5.00 | NA | NA | NA | NA | -0.38 | -0.19 | -0.08 | -0.21 | -0.21 | -0.04 |
| 146691.00 | TOM1L2 | 5.00 | NA | NA | NA | NA | -0.49 | -0.23 | -0.09 | -0.25 | -0.11 | -0.05 |
| 113829.00 | SLC35A4 | 5.00 | NA | NA | NA | NA | -0.48 | -0.09 | 0.09 | -0.29 | -0.09 | -0.04 |
| 339344.00 | MYPOP | 5.00 | NA | NA | NA | NA | -0.41 | -0.11 | 0.04 | -0.16 | -0.05 | -0.07 |
| 64787.00 | EPS8L2 | 5.00 | NA | NA | NA | NA | -0.46 | -0.24 | -0.14 | -0.14 | -0.07 | -0.07 |
| 55929.00 | DMAP1 | 5.00 | NA | NA | NA | NA | -0.47 | -0.17 | -0.04 | -0.18 | -0.30 | -0.10 |
| 2907.00 | GRINA | 5.00 | NA | NA | NA | NA | -0.53 | -0.18 | 0.01 | -0.23 | -0.07 | -0.03 |
| 5187.00 | PER1 | 5.00 | NA | NA | NA | NA | -0.57 | -0.18 | 0.02 | -0.22 | -0.13 | -0.11 |
| 55095.00 | SAMD4B | 5.00 | NA | NA | NA | NA | -0.55 | -0.16 | 0.05 | -0.28 | 0.04 | 0.00 |
| 10620.00 | ARID3B | 5.00 | NA | NA | NA | NA | -0.47 | -0.12 | -0.05 | -0.12 | -0.11 | -0.11 |
| 161882.00 | ZFPM1 | 5.00 | NA | NA | NA | NA | -0.47 | -0.32 | 0.02 | -0.13 | -0.05 | 0.14 |
| 22864.00 | R3HDM2 | 5.00 | NA | NA | NA | NA | -0.39 | -0.07 | 0.03 | -0.17 | 0.01 | -0.06 |
| 55344.00 | PLCXD1 | 5.00 | NA | NA | NA | NA | -0.39 | -0.13 | -0.07 | -0.13 | -0.12 | 0.05 |
| 128239.00 | IQGAP3 | 5.00 | NA | NA | NA | NA | -0.42 | -0.22 | -0.13 | -0.28 | -0.19 | -0.04 |
| 1435.00 | CSF1 | 5.00 | NA | NA | NA | NA | -0.46 | -0.17 | -0.05 | -0.22 | -0.03 | -0.08 |
| 9968.00 | MED12 | 5.00 | NA | NA | NA | NA | -0.39 | -0.17 | -0.02 | -0.24 | -0.11 | -0.03 |
| 752.00 | FMNL1 | 5.00 | NA | NA | NA | NA | -0.49 | -0.15 | 0.02 | -0.16 | -0.03 | 0.02 |
| 4059.00 | BCAM | 5.00 | NA | NA | NA | NA | -0.45 | -0.23 | -0.14 | -0.26 | -0.26 | -0.16 |
| 81848.00 | SPRY4 | 5.00 | NA | NA | NA | NA | -0.50 | -0.23 | -0.12 | -0.24 | 0.24 | -0.14 |
| 375033.00 | PEAR1 | 5.00 | NA | NA | NA | NA | -0.54 | -0.34 | 0.01 | -0.11 | 0.05 | 0.03 |
| 399473.00 | SPRED3 | 5.00 | NA | NA | NA | NA | -0.55 | -0.28 | -0.07 | -0.22 | 0.16 | -0.03 |
| 9725.00 | TMEM63A | 5.00 | NA | NA | NA | NA | -0.43 | -0.16 | -0.06 | -0.09 | -0.03 | 0.06 |
| 6829.00 | SUPT5H | 5.00 | NA | NA | NA | NA | -0.38 | -0.12 | -0.02 | -0.15 | -0.18 | -0.06 |
| 4122.00 | MAN2A2 | 5.00 | NA | NA | NA | NA | -0.47 | -0.16 | 0.02 | -0.18 | -0.19 | -0.02 |
| 85301.00 | COL27A1 | 5.00 | NA | NA | NA | NA | -0.42 | -0.07 | -0.04 | -0.10 | -0.08 | -0.09 |
| 140688.00 | NOL4L | 5.00 | NA | NA | NA | NA | -0.41 | -0.18 | -0.02 | -0.25 | 0.00 | -0.20 |
| 26112.00 | CCDC69 | 5.00 | NA | NA | NA | NA | -0.41 | -0.22 | -0.24 | -0.14 | 0.03 | 0.00 |
| 192683.00 | SCAMP5 | 5.00 | NA | NA | NA | NA | -0.46 | -0.26 | -0.15 | -0.35 | -0.11 | -0.15 |
| 92235.00 | DUSP27 | 5.00 | NA | NA | NA | NA | -0.45 | -0.32 | -0.09 | -0.17 | -0.27 | -0.30 |
| 10554.00 | AGPAT1 | 5.00 | NA | NA | NA | NA | -0.48 | -0.11 | 0.05 | -0.31 | -0.12 | -0.02 |
| 57139.00 | RGL3 | 5.00 | NA | NA | NA | NA | -0.48 | -0.20 | -0.04 | -0.20 | -0.08 | 0.08 |
| 57523.00 | NYNRIN | 5.00 | NA | NA | NA | NA | -0.48 | -0.30 | -0.16 | -0.32 | -0.10 | -0.21 |
| 81606.00 | LBH | 5.00 | NA | NA | NA | NA | -0.22 | -0.15 | -0.17 | -0.03 | -0.16 | -0.43 |
| 23467.00 | NPTXR | 5.00 | NA | NA | NA | NA | -0.52 | -0.12 | 0.00 | -0.20 | 0.03 | -0.01 |
| 149478.00 | BTBD19 | 5.00 | NA | NA | NA | NA | -0.48 | -0.28 | -0.08 | -0.14 | -0.10 | -0.01 |
| 100130417.00 | LOC100130417 | 5.00 | NA | NA | NA | NA | -0.40 | -0.15 | -0.11 | -0.11 | -0.16 | 0.00 |
| NA | NA | 5.00 | NA | NA | NA | NA | -0.09 | -0.02 | -0.39 | -0.20 | -0.10 | -0.19 |
| 7726.00 | TRIM26 | 5.00 | NA | NA | NA | NA | -0.40 | -0.14 | -0.03 | -0.22 | -0.08 | -0.05 |
| NA | NA | 5.00 | NA | NA | NA | NA | -0.30 | -0.38 | 0.10 | -0.01 | -0.05 | -0.01 |
| 8705.00 | B3GALT4 | 5.00 | NA | NA | NA | NA | -0.16 | -0.41 | -0.16 | -0.15 | -0.09 | -0.03 |
| 54753.00 | ZNF853 | 5.00 | NA | NA | NA | NA | -0.46 | -0.19 | -0.11 | -0.07 | -0.08 | -0.06 |
| NA | NA | 5.00 | NA | NA | NA | NA | -0.48 | -0.14 | 0.02 | -0.25 | -0.08 | -0.09 |
| 286103.00 | ZNF252P-AS1 | 5.00 | NA | NA | NA | NA | -0.41 | -0.08 | -0.16 | -0.07 | 0.06 | -0.07 |
| 100462983.00 | MTRNR2L3 | 5.00 | NA | NA | NA | NA | -0.12 | 0.03 | -0.06 | -0.49 | 0.15 | -0.04 |
| 100462977.00 | MTRNR2L1 | 5.00 | NA | NA | NA | NA | -0.11 | -0.02 | -0.16 | -0.49 | 0.12 | -0.14 |
| NA | NA | 5.00 | NA | NA | NA | NA | -0.41 | -0.12 | -0.01 | -0.21 | 0.02 | -0.06 |
| 105371795.00 | LOC105371795 | 5.00 | NA | NA | NA | NA | -0.42 | -0.24 | -0.19 | -0.27 | -0.08 | -0.20 |
| NA | NA | 5.00 | NA | NA | NA | NA | -0.38 | -0.18 | -0.11 | -0.11 | -0.16 | -0.24 |
| NA | NA | 5.00 | NA | NA | NA | NA | -0.09 | 0.00 | -0.05 | -0.41 | 0.08 | -0.02 |
| NA | NA | 5.00 | NA | NA | NA | NA | -0.13 | -0.05 | -0.38 | -0.13 | -0.11 | -0.04 |
| NA | NA | 5.00 | NA | NA | NA | NA | -0.48 | -0.13 | -0.05 | -0.22 | 0.09 | -0.07 |
| 729438.00 | GATSL2 | 5.00 | NA | NA | NA | NA | -0.66 | -0.27 | -0.09 | -0.28 | -0.37 | -0.16 |
| NA | NA | 5.00 | NA | NA | NA | NA | -0.40 | -0.16 | -0.08 | -0.09 | -0.14 | -0.06 |
| 9369.00 | NRXN3 | 6.00 | Linear | 2.90 | 0.54 | 185.39 | 0.16 | 0.45 | 0.49 | 0.23 | -0.08 | -0.10 |
| 151887.00 | CCDC80 | 6.00 | Linear | 2.87 | 0.43 | 382.10 | 0.14 | 0.45 | 0.45 | 0.18 | -0.35 | -0.14 |
| 6319.00 | SCD | 6.00 | Linear | 1.73 | 0.21 | 251.39 | 0.20 | 0.41 | 0.46 | 0.35 | -0.08 | -0.18 |
| 9037.00 | SEMA5A | 6.00 | Linear | 2.18 | 0.46 | 193.15 | 0.27 | 0.55 | 0.55 | 0.21 | -0.31 | -0.33 |
| 57568.00 | SIPA1L2 | 6.00 | Poly 2 | 1.15 | 0.31 | 62.64 | 0.24 | 0.34 | 0.41 | 0.20 | -0.13 | 0.00 |
| 57451.00 | TENM2 | 6.00 | Linear | 2.11 | 0.13 | 238.15 | 0.19 | 0.51 | 0.56 | 0.27 | -0.16 | -0.12 |
| 223117.00 | SEMA3D | 6.00 | Linear | 1.93 | 0.58 | 171.32 | 0.31 | 0.38 | 0.41 | 0.23 | -0.07 | -0.06 |
| 9510.00 | ADAMTS1 | 6.00 | Power | 4.04 | 0.26 | 244.88 | 0.31 | 0.48 | 0.47 | 0.51 | 0.23 | -0.03 |
| 11096.00 | ADAMTS5 | 6.00 | Poly 3 | 2.12 | 0.26 | 194.97 | 0.18 | 0.42 | 0.47 | 0.43 | 0.14 | -0.14 |
| 51313.00 | FAM198B | 6.00 | Linear | 2.89 | 0.86 | 178.31 | 0.33 | 0.47 | 0.50 | 0.28 | -0.22 | -0.11 |
| 6335.00 | SCN9A | 6.00 | Linear | 2.34 | 0.75 | 209.39 | 0.33 | 0.43 | 0.34 | 0.16 | -0.13 | -0.06 |
| 57484.00 | RNF150 | 6.00 | Power | 2.47 | 0.68 | 106.54 | 0.33 | 0.43 | 0.43 | 0.19 | 0.07 | 0.03 |
| 5069.00 | PAPPA | 6.00 | Linear | 2.47 | 0.12 | 107.63 | 0.15 | 0.44 | 0.49 | 0.42 | 0.07 | -0.04 |
| 121504.00 | HIST4H4 | 6.00 | Poly 2 | 0.57 | 0.45 | 168.98 | 0.44 | 0.49 | 0.48 | 0.37 | -0.17 | 0.15 |
| NA | NA | 6.00 | Poly 3 | 0.03 | 0.10 | 267.11 | -0.44 | 0.93 | 1.92 | 1.68 | 0.00 | 0.11 |
| 8359.00 | HIST1H4A | 6.00 | Poly 3 | 1.71 | 0.57 | 124.58 | 0.31 | 0.48 | 0.56 | 0.50 | -0.11 | 0.23 |
| 11231.00 | SEC63 | 6.00 | NA | NA | NA | NA | -0.14 | 0.31 | 0.34 | 0.41 | 0.09 | 0.06 |
| 586.00 | BCAT1 | 6.00 | NA | NA | NA | NA | 0.36 | 0.39 | 0.34 | 0.28 | -0.13 | 0.06 |
| 7049.00 | TGFBR3 | 6.00 | NA | NA | NA | NA | 0.11 | 0.23 | 0.40 | 0.27 | 0.00 | 0.16 |
| 64376.00 | IKZF5 | 6.00 | NA | NA | NA | NA | 0.06 | 0.29 | 0.48 | 0.20 | 0.14 | 0.08 |
| 8829.00 | NRP1 | 6.00 | NA | NA | NA | NA | 0.20 | 0.39 | 0.42 | 0.32 | 0.21 | 0.26 |
| 3696.00 | ITGB8 | 6.00 | NA | NA | NA | NA | 0.23 | 0.32 | 0.38 | 0.29 | -0.03 | -0.22 |
| 2737.00 | GLI3 | 6.00 | NA | NA | NA | NA | -0.06 | 0.37 | 0.46 | 0.25 | 0.32 | 0.15 |
| 5532.00 | PPP3CB | 6.00 | NA | NA | NA | NA | 0.10 | 0.37 | 0.49 | 0.30 | 0.05 | 0.09 |
| 7803.00 | PTP4A1 | 6.00 | NA | NA | NA | NA | 0.11 | 0.31 | 0.43 | 0.34 | 0.11 | 0.12 |
| 4015.00 | LOX | 6.00 | NA | NA | NA | NA | 0.17 | 0.44 | 0.47 | 0.56 | 0.27 | -0.01 |
| 10622.00 | POLR3G | 6.00 | NA | NA | NA | NA | 0.38 | 0.34 | 0.37 | 0.27 | 0.05 | 0.07 |
| 3488.00 | IGFBP5 | 6.00 | NA | NA | NA | NA | -0.03 | 0.25 | 0.40 | 0.16 | 0.16 | -0.11 |
| 5999.00 | RGS4 | 6.00 | NA | NA | NA | NA | 0.45 | 0.34 | 0.30 | 0.51 | 0.52 | 0.01 |
| 8828.00 | NRP2 | 6.00 | NA | NA | NA | NA | 0.14 | 0.38 | 0.42 | 0.23 | 0.14 | 0.00 |
| 8609.00 | KLF7 | 6.00 | NA | NA | NA | NA | -0.01 | 0.32 | 0.38 | 0.24 | 0.19 | 0.04 |
| 9194.00 | SLC16A7 | 6.00 | NA | NA | NA | NA | 0.32 | 0.38 | 0.38 | 0.38 | 0.28 | 0.10 |
| 3624.00 | INHBA | 6.00 | NA | NA | NA | NA | -0.01 | 0.38 | 0.42 | 0.43 | 0.12 | -0.15 |
| 1131.00 | CHRM3 | 6.00 | NA | NA | NA | NA | 0.36 | 0.46 | 0.47 | 0.36 | -0.09 | -0.01 |
| 7057.00 | THBS1 | 6.00 | NA | NA | NA | NA | 0.18 | 0.33 | 0.30 | 0.39 | 0.09 | -0.12 |
| 471.00 | ATIC | 6.00 | NA | NA | NA | NA | 0.01 | 0.32 | 0.60 | 0.34 | -0.15 | 0.07 |
| 93649.00 | MYOCD | 6.00 | NA | NA | NA | NA | 0.03 | 0.29 | 0.43 | 0.33 | 0.21 | -0.19 |
| 3491.00 | CYR61 | 6.00 | NA | NA | NA | NA | -0.05 | 0.28 | 0.40 | 0.34 | 0.09 | -0.10 |
| 3756.00 | KCNH1 | 6.00 | NA | NA | NA | NA | 0.22 | 0.39 | 0.37 | 0.15 | -0.15 | -0.02 |
| 2312.00 | FLG | 6.00 | NA | NA | NA | NA | 0.00 | 0.43 | 0.44 | 0.24 | -0.18 | -0.18 |
| 2044.00 | EPHA5 | 6.00 | NA | NA | NA | NA | 0.19 | 0.38 | 0.48 | 0.16 | -0.07 | 0.02 |
| 5860.00 | QDPR | 6.00 | NA | NA | NA | NA | -0.20 | 0.24 | 0.41 | 0.45 | 0.16 | -0.05 |
| 636.00 | BICD1 | 6.00 | NA | NA | NA | NA | 0.18 | 0.33 | 0.32 | 0.43 | 0.27 | 0.15 |
| 79750.00 | ZNF385D | 6.00 | NA | NA | NA | NA | 0.25 | 0.33 | 0.42 | 0.29 | 0.10 | 0.13 |
| 133522.00 | PPARGC1B | 6.00 | NA | NA | NA | NA | 0.04 | 0.33 | 0.43 | 0.29 | 0.04 | 0.08 |
| 4325.00 | MMP16 | 6.00 | NA | NA | NA | NA | 0.27 | 0.39 | 0.44 | 0.30 | 0.16 | 0.10 |
| 3084.00 | NRG1 | 6.00 | NA | NA | NA | NA | 0.23 | 0.45 | 0.49 | 0.25 | 0.20 | -0.02 |
| 3099.00 | HK2 | 6.00 | NA | NA | NA | NA | -0.03 | 0.50 | 0.59 | 0.50 | -0.26 | -0.20 |
| 91624.00 | NEXN | 6.00 | NA | NA | NA | NA | -0.17 | 0.37 | 0.51 | 0.58 | 0.05 | 0.11 |
| 10424.00 | PGRMC2 | 6.00 | NA | NA | NA | NA | -0.01 | 0.29 | 0.33 | 0.39 | 0.01 | 0.01 |
| 64399.00 | HHIP | 6.00 | NA | NA | NA | NA | 0.19 | 0.42 | 0.48 | 0.47 | 0.41 | 0.30 |
| 26050.00 | SLITRK5 | 6.00 | NA | NA | NA | NA | 0.11 | 0.32 | 0.38 | 0.12 | 0.05 | 0.05 |
| 162681.00 | C18orf54 | 6.00 | NA | NA | NA | NA | 0.09 | 0.29 | 0.42 | 0.38 | 0.21 | 0.19 |
| 2668.00 | GDNF | 6.00 | NA | NA | NA | NA | -0.01 | 0.37 | 0.44 | 0.21 | -0.06 | 0.05 |
| 4648.00 | MYO7B | 6.00 | NA | NA | NA | NA | 0.18 | 0.35 | 0.39 | 0.29 | 0.20 | 0.22 |
| 214.00 | ALCAM | 6.00 | NA | NA | NA | NA | 0.42 | 0.37 | 0.34 | 0.32 | 0.18 | 0.11 |
| 220988.00 | HNRNPA3 | 6.00 | NA | NA | NA | NA | 0.05 | 0.37 | 0.37 | 0.53 | 0.15 | 0.09 |
| 54796.00 | BNC2 | 6.00 | NA | NA | NA | NA | 0.08 | 0.30 | 0.42 | 0.26 | 0.26 | 0.08 |
| 7298.00 | TYMS | 6.00 | NA | NA | NA | NA | 0.09 | 0.25 | 0.41 | 0.34 | 0.02 | 0.11 |
| 115207.00 | KCTD12 | 6.00 | NA | NA | NA | NA | 0.15 | 0.36 | 0.46 | 0.23 | 0.00 | -0.01 |
| 80010.00 | RMI1 | 6.00 | NA | NA | NA | NA | 0.24 | 0.36 | 0.40 | 0.54 | 0.31 | 0.13 |
| 23212.00 | RRS1 | 6.00 | NA | NA | NA | NA | -0.03 | 0.34 | 0.41 | 0.28 | -0.14 | 0.02 |
| 120103.00 | SLC36A4 | 6.00 | NA | NA | NA | NA | 0.02 | 0.29 | 0.39 | 0.21 | 0.01 | 0.15 |
| 5021.00 | OXTR | 6.00 | NA | NA | NA | NA | 0.25 | 0.36 | 0.35 | 0.44 | 0.03 | -0.13 |
| 8633.00 | UNC5C | 6.00 | NA | NA | NA | NA | 0.35 | 0.42 | 0.33 | 0.34 | 0.10 | 0.07 |
| 147372.00 | CCBE1 | 6.00 | NA | NA | NA | NA | 0.18 | 0.35 | 0.39 | 0.31 | 0.21 | 0.07 |
| 23768.00 | FLRT2 | 6.00 | NA | NA | NA | NA | 0.10 | 0.33 | 0.41 | 0.18 | 0.20 | 0.07 |
| 7026.00 | NR2F2 | 6.00 | NA | NA | NA | NA | -0.11 | 0.28 | 0.39 | 0.18 | 0.14 | 0.00 |
| 4541.00 | ND6 | 6.00 | NA | NA | NA | NA | -0.04 | 0.41 | 0.18 | 0.43 | 0.16 | -0.07 |
| 100128770.00 | LOC100128770 | 6.00 | NA | NA | NA | NA | 0.02 | 0.43 | 0.17 | 0.18 | 0.15 | 0.21 |
| 8341.00 | HIST1H2BN | 6.00 | NA | NA | NA | NA | 0.28 | 0.39 | 0.39 | 0.26 | -0.06 | 0.18 |
| NA | NA | 6.00 | NA | NA | NA | NA | 0.12 | 0.02 | 0.46 | 0.40 | -0.19 | 0.33 |
| 23089.00 | PEG10 | 6.00 | NA | NA | NA | NA | 0.05 | 0.36 | 0.43 | 0.19 | 0.02 | -0.02 |
| NA | NA | 6.00 | NA | NA | NA | NA | 0.01 | 0.30 | 0.40 | 0.28 | 0.26 | 0.13 |
| NA | NA | 6.00 | NA | NA | NA | NA | 0.08 | 0.10 | 0.43 | 0.21 | -0.12 | 0.10 |
| NA | NA | 6.00 | NA | NA | NA | NA | 0.15 | -0.16 | 0.31 | 0.52 | -0.30 | 0.40 |
| NA | NA | 6.00 | NA | NA | NA | NA | 0.00 | 0.32 | 0.39 | 0.25 | 0.13 | 0.20 |
| NA | NA | 6.00 | NA | NA | NA | NA | 0.24 | 0.46 | 0.48 | 0.30 | 0.23 | 0.04 |
| 8367.00 | HIST1H4E | 6.00 | NA | NA | NA | NA | 0.26 | 0.56 | 0.59 | 0.51 | -0.02 | 0.26 |
| 4082.00 | MARCKS | 6.00 | NA | NA | NA | NA | 0.17 | 0.32 | 0.42 | 0.14 | -0.07 | 0.02 |
| NA | NA | 6.00 | NA | NA | NA | NA | 0.02 | 0.21 | 0.45 | 0.19 | 0.10 | 0.19 |
| 8123.00 | PWAR5 | 6.00 | NA | NA | NA | NA | 0.01 | 0.31 | 0.38 | 0.32 | 0.13 | 0.14 |
| 3371.00 | TNC | 7.00 | Linear | 3.06 | 0.28 | 281.62 | 0.09 | 0.36 | 0.44 | 0.13 | -0.32 | -0.09 |
| 1301.00 | COL11A1 | 7.00 | Exp 5 | 1.48 | 0.24 | 185.41 | -0.06 | 0.23 | 0.28 | 0.11 | -0.59 | -0.35 |
| 25878.00 | MXRA5 | 7.00 | Power | 3.08 | 0.36 | 152.74 | -0.16 | 0.31 | 0.31 | 0.04 | -0.41 | -0.36 |
| 3625.00 | INHBB | 7.00 | Poly 2 | 0.96 | 0.07 | 90.12 | 0.17 | 0.40 | 0.39 | 0.17 | -0.51 | -0.25 |
| 1278.00 | COL1A2 | 7.00 | Linear | 2.73 | 0.49 | 353.71 | 0.08 | 0.21 | 0.27 | 0.04 | -0.44 | -0.22 |
| 221092.00 | HNRNPUL2 | 7.00 | Poly 3 | 0.22 | 0.12 | 167.35 | -0.42 | 0.16 | 0.28 | 0.35 | -0.13 | -0.01 |
| 3309.00 | HSPA5 | 7.00 | NA | NA | NA | NA | -0.18 | 0.25 | 0.44 | 0.16 | -0.35 | -0.21 |
| 28996.00 | HIPK2 | 7.00 | NA | NA | NA | NA | -0.28 | 0.26 | 0.48 | 0.14 | 0.24 | 0.12 |
| 1316.00 | KLF6 | 7.00 | NA | NA | NA | NA | -0.35 | 0.21 | 0.40 | 0.22 | -0.04 | -0.10 |
| 10523.00 | CHERP | 7.00 | NA | NA | NA | NA | -0.50 | 0.14 | 0.44 | -0.01 | -0.05 | -0.05 |
| 5705.00 | PSMC5 | 7.00 | NA | NA | NA | NA | -0.38 | 0.08 | 0.24 | 0.15 | -0.07 | -0.03 |
| 4313.00 | MMP2 | 7.00 | NA | NA | NA | NA | -0.08 | 0.25 | 0.41 | -0.04 | 0.05 | -0.03 |
| 2521.00 | FUS | 7.00 | NA | NA | NA | NA | -0.25 | 0.24 | 0.37 | 0.39 | -0.14 | 0.04 |
| 3189.00 | HNRNPH3 | 7.00 | NA | NA | NA | NA | -0.43 | 0.48 | 0.79 | 0.49 | -0.23 | 0.02 |
| 4670.00 | HNRNPM | 7.00 | NA | NA | NA | NA | -0.42 | 0.10 | 0.29 | 0.13 | -0.17 | -0.05 |
| 4627.00 | MYH9 | 7.00 | NA | NA | NA | NA | -0.35 | 0.23 | 0.39 | 0.12 | -0.34 | -0.04 |
| 328.00 | APEX1 | 7.00 | NA | NA | NA | NA | -0.13 | 0.16 | 0.41 | -0.09 | -0.36 | 0.04 |
| 5411.00 | PNN | 7.00 | NA | NA | NA | NA | -0.41 | 0.16 | 0.21 | 0.13 | -0.26 | -0.03 |
| 10848.00 | PPP1R13L | 7.00 | NA | NA | NA | NA | -0.41 | 0.09 | 0.35 | 0.09 | -0.01 | -0.01 |
| 6217.00 | RPS16 | 7.00 | NA | NA | NA | NA | -0.57 | 0.17 | 0.88 | -0.01 | -0.92 | 0.07 |
| 7040.00 | TGFB1 | 7.00 | NA | NA | NA | NA | -0.48 | 0.11 | 0.38 | 0.11 | 0.03 | 0.03 |
| 6158.00 | RPL28 | 7.00 | NA | NA | NA | NA | -0.43 | 0.17 | 0.26 | 0.15 | 0.06 | -0.07 |
| 1277.00 | COL1A1 | 7.00 | NA | NA | NA | NA | -0.43 | 0.24 | 0.58 | -0.15 | -0.42 | -0.28 |
| 54433.00 | GAR1 | 7.00 | NA | NA | NA | NA | -0.17 | 0.35 | 0.50 | 0.32 | -0.25 | 0.07 |
| 79080.00 | CCDC86 | 7.00 | NA | NA | NA | NA | -0.25 | 0.24 | 0.42 | 0.07 | -0.36 | 0.02 |
| 10728.00 | PTGES3 | 7.00 | NA | NA | NA | NA | -0.10 | 0.30 | 0.41 | 0.16 | -0.10 | 0.03 |
| 4691.00 | NCL | 7.00 | NA | NA | NA | NA | -0.43 | 0.33 | 0.51 | 0.34 | -0.32 | 0.02 |
| 6723.00 | SRM | 7.00 | NA | NA | NA | NA | -0.20 | 0.32 | 0.52 | 0.15 | -0.08 | 0.06 |
| 3181.00 | HNRNPA2B1 | 7.00 | NA | NA | NA | NA | -0.54 | 0.20 | 0.50 | 0.49 | -0.05 | 0.09 |
| 23091.00 | ZC3H13 | 7.00 | NA | NA | NA | NA | -0.39 | 0.20 | 0.36 | 0.13 | -0.17 | 0.01 |
| 4035.00 | LRP1 | 7.00 | NA | NA | NA | NA | -0.42 | 0.12 | 0.33 | 0.10 | -0.16 | -0.13 |
| 79026.00 | AHNAK | 7.00 | NA | NA | NA | NA | -0.28 | 0.23 | 0.38 | 0.11 | -0.04 | -0.08 |
| 154796.00 | AMOT | 7.00 | NA | NA | NA | NA | -0.16 | 0.24 | 0.41 | 0.14 | -0.21 | -0.05 |
| 84081.00 | NSRP1 | 7.00 | NA | NA | NA | NA | -0.58 | 0.21 | 0.36 | 0.38 | -0.24 | 0.07 |
| 1289.00 | COL5A1 | 7.00 | NA | NA | NA | NA | -0.07 | 0.25 | 0.36 | 0.09 | -0.41 | -0.19 |
| 4131.00 | MAP1B | 7.00 | NA | NA | NA | NA | -0.30 | 0.22 | 0.42 | 0.04 | 0.09 | 0.00 |
| 10631.00 | POSTN | 7.00 | NA | NA | NA | NA | 0.13 | 0.39 | 0.45 | 0.06 | -0.56 | -0.16 |
| 4017.00 | LOXL2 | 7.00 | NA | NA | NA | NA | -0.08 | 0.33 | 0.43 | 0.31 | -0.14 | -0.15 |
| 10541.00 | ANP32B | 7.00 | NA | NA | NA | NA | -0.23 | 0.45 | 0.56 | 0.27 | -0.14 | -0.02 |
| 7020.00 | TFAP2A | 7.00 | NA | NA | NA | NA | -0.34 | 0.22 | 0.46 | 0.06 | 0.20 | 0.05 |
| 6176.00 | RPLP1 | 7.00 | NA | NA | NA | NA | -0.38 | 0.23 | 0.48 | -0.05 | -0.53 | 0.07 |
| 10097.00 | ACTR2 | 7.00 | NA | NA | NA | NA | -0.21 | 0.28 | 0.45 | 0.24 | -0.10 | 0.01 |
| 3480.00 | IGF1R | 7.00 | NA | NA | NA | NA | -0.23 | 0.21 | 0.41 | 0.08 | -0.07 | -0.05 |
| 5872.00 | RAB13 | 7.00 | NA | NA | NA | NA | -0.38 | 0.09 | 0.27 | 0.36 | 0.01 | 0.06 |
| 3899.00 | AFF3 | 7.00 | NA | NA | NA | NA | -0.03 | 0.24 | 0.44 | 0.09 | -0.06 | 0.03 |
| 678.00 | ZFP36L2 | 7.00 | NA | NA | NA | NA | -0.19 | 0.21 | 0.46 | 0.28 | 0.12 | 0.03 |
| 9669.00 | EIF5B | 7.00 | NA | NA | NA | NA | -0.42 | 0.28 | 0.45 | 0.48 | -0.21 | 0.05 |
| 6294.00 | SAFB | 7.00 | NA | NA | NA | NA | -0.45 | 0.17 | 0.32 | 0.19 | -0.23 | -0.07 |
| 25903.00 | OLFML2B | 7.00 | NA | NA | NA | NA | -0.04 | 0.22 | 0.39 | 0.04 | -0.02 | 0.03 |
| 72.00 | ACTG2 | 7.00 | NA | NA | NA | NA | 0.02 | 0.38 | 0.29 | 0.04 | -0.28 | -0.14 |
| 5580.00 | PRKCD | 7.00 | NA | NA | NA | NA | -0.52 | 0.04 | 0.39 | 0.27 | -0.05 | -0.04 |
| 23524.00 | SRRM2 | 7.00 | NA | NA | NA | NA | -0.43 | 0.23 | 0.48 | 0.05 | 0.20 | -0.01 |
| 5093.00 | PCBP1 | 7.00 | NA | NA | NA | NA | -0.19 | 0.20 | 0.39 | 0.22 | -0.05 | -0.05 |
| 4615.00 | MYD88 | 7.00 | NA | NA | NA | NA | -0.44 | 0.10 | 0.46 | -0.02 | -0.29 | -0.01 |
| 10949.00 | HNRNPA0 | 7.00 | NA | NA | NA | NA | -0.36 | 0.17 | 0.40 | 0.16 | -0.24 | 0.00 |
| 285464.00 | CRIPAK | 7.00 | NA | NA | NA | NA | -0.19 | 0.24 | 0.43 | 0.31 | 0.04 | 0.12 |
| 7262.00 | PHLDA2 | 7.00 | NA | NA | NA | NA | -0.39 | 0.10 | 0.38 | 0.09 | -0.14 | -0.06 |
| 57634.00 | EP400 | 7.00 | NA | NA | NA | NA | -0.31 | 0.23 | 0.44 | 0.19 | 0.15 | 0.07 |
| 3858.00 | KRT10 | 7.00 | NA | NA | NA | NA | -0.25 | 0.19 | 0.42 | 0.16 | -0.13 | 0.04 |
| 9819.00 | TSC22D2 | 7.00 | NA | NA | NA | NA | -0.25 | 0.17 | 0.39 | 0.04 | 0.02 | -0.02 |
| 9612.00 | NCOR2 | 7.00 | NA | NA | NA | NA | -0.45 | 0.17 | 0.44 | 0.13 | 0.06 | -0.04 |
| 6281.00 | S100A10 | 7.00 | NA | NA | NA | NA | -0.11 | 0.27 | 0.38 | 0.16 | -0.17 | -0.05 |
| 4513.00 | COX2 | 7.00 | NA | NA | NA | NA | -0.74 | 0.39 | 0.69 | -0.06 | 0.09 | -0.06 |
| 4537.00 | ND3 | 7.00 | NA | NA | NA | NA | -0.94 | 0.21 | 0.79 | -0.14 | -0.30 | 0.05 |
| 3897.00 | L1CAM | 7.00 | NA | NA | NA | NA | -0.15 | 0.25 | 0.41 | 0.08 | -0.09 | -0.05 |
| 664709.00 | HNRNPA1P10 | 7.00 | NA | NA | NA | NA | -0.19 | 0.21 | 0.40 | 0.14 | -0.21 | 0.04 |
| 84627.00 | ZNF469 | 7.00 | NA | NA | NA | NA | -0.23 | 0.15 | 0.50 | 0.26 | 0.21 | -0.08 |
| 389813.00 | C9orf172 | 7.00 | NA | NA | NA | NA | 0.07 | 0.07 | 0.40 | 0.10 | -0.24 | 0.04 |
| 378938.00 | MALAT1 | 7.00 | NA | NA | NA | NA | -0.38 | 0.43 | 0.51 | 0.51 | -0.11 | 0.06 |
| 6182.00 | MRPL12 | 7.00 | NA | NA | NA | NA | -0.42 | 0.10 | 0.38 | 0.06 | -0.25 | -0.12 |
| NA | NA | 7.00 | NA | NA | NA | NA | 0.04 | 0.01 | 0.38 | -0.05 | 0.06 | -0.01 |
| 29799.00 | YPEL1 | 8.00 | Linear | 1.03 | 0.36 | 81.93 | -0.28 | -0.40 | -0.31 | -0.27 | -0.03 | 0.02 |
| 1026.00 | CDKN1A | 8.00 | Poly 3 | 0.37 | 0.03 | 202.20 | -0.99 | -0.98 | -0.89 | -0.70 | 0.12 | -0.03 |
| 54858.00 | PGPEP1 | 8.00 | Linear | 0.72 | 0.46 | 96.21 | -0.39 | -0.37 | -0.27 | -0.18 | 0.01 | 0.02 |
| 4193.00 | MDM2 | 8.00 | Linear | 0.54 | 0.31 | 281.73 | -0.45 | -0.40 | -0.35 | -0.34 | 0.08 | 0.05 |
| 1950.00 | EGF | 8.00 | Poly 2 | 0.58 | 0.11 | 151.36 | -0.29 | -0.46 | -0.41 | -0.20 | 0.13 | -0.14 |
| 2232.00 | FDXR | 8.00 | Linear | 1.22 | 0.29 | 138.42 | -0.34 | -0.43 | -0.43 | -0.29 | -0.09 | -0.01 |
| 94241.00 | TP53INP1 | 8.00 | Linear | 0.43 | 0.54 | 160.04 | -0.71 | -0.58 | -0.42 | -0.46 | 0.03 | -0.03 |
| 5164.00 | PDK2 | 8.00 | NA | NA | NA | NA | -0.43 | -0.34 | -0.22 | -0.36 | 0.00 | -0.14 |
| 26999.00 | CYFIP2 | 8.00 | NA | NA | NA | NA | -0.78 | -0.61 | -0.59 | -0.47 | -0.03 | -0.11 |
| 1001.00 | CDH3 | 8.00 | NA | NA | NA | NA | -0.30 | -0.39 | -0.40 | -0.34 | -0.17 | -0.23 |
| 9423.00 | NTN1 | 8.00 | NA | NA | NA | NA | -0.24 | -0.35 | -0.39 | -0.30 | -0.04 | -0.03 |
| 22996.00 | TTC39A | 8.00 | NA | NA | NA | NA | -0.20 | -0.19 | -0.46 | -0.09 | -0.01 | -0.12 |
| 5027.00 | P2RX7 | 8.00 | NA | NA | NA | NA | -0.31 | -0.40 | -0.22 | -0.36 | -0.13 | -0.12 |
| 83719.00 | YPEL3 | 8.00 | NA | NA | NA | NA | -0.42 | -0.27 | -0.27 | -0.31 | -0.01 | -0.06 |
| 1299.00 | COL9A3 | 8.00 | NA | NA | NA | NA | -0.49 | -0.43 | -0.27 | -0.30 | -0.15 | -0.14 |
| 4320.00 | MMP11 | 8.00 | NA | NA | NA | NA | -0.17 | -0.42 | -0.29 | -0.27 | -0.13 | 0.02 |
| 25999.00 | CLIP3 | 8.00 | NA | NA | NA | NA | -0.80 | -0.26 | -0.21 | -0.60 | 0.17 | -0.29 |
| 27113.00 | BBC3 | 8.00 | NA | NA | NA | NA | -0.28 | -0.38 | -0.38 | -0.28 | 0.02 | -0.09 |
| 5143;729966 | PDE4C;LOC729966 | 8.00 | NA | NA | NA | NA | -0.66 | -0.57 | -0.51 | -0.35 | -0.14 | -0.11 |
| 27338.00 | UBE2S | 8.00 | NA | NA | NA | NA | -0.25 | -0.43 | -0.19 | -0.32 | -0.12 | -0.12 |
| 374.00 | AREG | 8.00 | NA | NA | NA | NA | -0.64 | -0.74 | -0.65 | -0.48 | 0.15 | -0.03 |
| 9381.00 | OTOF | 8.00 | NA | NA | NA | NA | -0.68 | -0.46 | -0.44 | -0.38 | -0.25 | -0.07 |
| 8503.00 | PIK3R3 | 8.00 | NA | NA | NA | NA | -0.39 | -0.33 | -0.35 | -0.21 | 0.10 | -0.06 |
| 10608.00 | MXD4 | 8.00 | NA | NA | NA | NA | -0.41 | -0.43 | -0.32 | -0.25 | -0.11 | -0.13 |
| 54478.00 | FAM64A | 8.00 | NA | NA | NA | NA | -0.10 | -0.34 | -0.41 | -0.28 | -0.17 | -0.19 |
| 23025.00 | UNC13A | 8.00 | NA | NA | NA | NA | -0.55 | -0.32 | -0.33 | -0.23 | 0.00 | -0.02 |
| 9518.00 | GDF15 | 8.00 | NA | NA | NA | NA | -0.62 | -0.71 | -0.67 | -0.52 | 0.03 | 0.07 |
| 283120.00 | H19 | 8.00 | NA | NA | NA | NA | -0.52 | -0.34 | -0.35 | -0.40 | -0.16 | -0.08 |
| 51308.00 | REEP2 | 8.00 | NA | NA | NA | NA | -0.38 | -0.38 | -0.26 | -0.21 | -0.14 | -0.12 |
| 64900.00 | LPIN3 | 8.00 | NA | NA | NA | NA | -0.40 | -0.37 | -0.34 | -0.20 | -0.07 | -0.02 |
| 891.00 | CCNB1 | 8.00 | NA | NA | NA | NA | -0.07 | -0.30 | -0.39 | -0.29 | -0.16 | -0.18 |
| 27165.00 | GLS2 | 8.00 | NA | NA | NA | NA | -0.34 | -0.43 | -0.51 | -0.34 | 0.04 | -0.02 |
| 9635.00 | CLCA2 | 8.00 | NA | NA | NA | NA | -0.46 | -0.55 | -0.54 | -0.37 | -0.02 | -0.20 |
| 53836.00 | GPR87 | 8.00 | NA | NA | NA | NA | -0.46 | -0.59 | -0.39 | -0.32 | 0.19 | -0.01 |
| 83758.00 | RBP5 | 8.00 | NA | NA | NA | NA | -0.24 | -0.13 | -0.39 | -0.19 | -0.07 | -0.18 |
| 81607.00 | NECTIN4 | 8.00 | NA | NA | NA | NA | -0.74 | -0.62 | -0.62 | -0.50 | -0.20 | -0.03 |
| 10205.00 | MPZL2 | 8.00 | NA | NA | NA | NA | -0.32 | -0.11 | -0.44 | -0.14 | -0.01 | -0.05 |
| 7108.00 | TM7SF2 | 8.00 | NA | NA | NA | NA | -0.50 | -0.42 | -0.31 | -0.49 | -0.39 | -0.14 |
| 26256.00 | CABYR | 8.00 | NA | NA | NA | NA | -0.33 | -0.39 | -0.32 | -0.34 | -0.01 | -0.17 |
| 7079.00 | TIMP4 | 8.00 | NA | NA | NA | NA | -0.21 | -0.32 | -0.36 | -0.40 | 0.12 | -0.05 |
| 201176.00 | ARHGAP27 | 8.00 | NA | NA | NA | NA | -0.44 | -0.32 | -0.27 | -0.28 | -0.06 | -0.05 |
| 7832.00 | BTG2 | 8.00 | NA | NA | NA | NA | -0.71 | -0.65 | -0.59 | -0.47 | -0.09 | -0.08 |
| 84814.00 | PLPP7 | 8.00 | NA | NA | NA | NA | -0.33 | -0.44 | -0.40 | -0.23 | -0.05 | -0.16 |
| 117283.00 | IP6K3 | 8.00 | NA | NA | NA | NA | -0.37 | -0.42 | -0.48 | -0.34 | -0.07 | -0.09 |
| 374946.00 | DRAXIN | 8.00 | NA | NA | NA | NA | -0.62 | -0.69 | -0.55 | -0.62 | -0.17 | -0.12 |
| 6692.00 | SPINT1 | 8.00 | NA | NA | NA | NA | -0.41 | -0.38 | -0.25 | -0.28 | -0.19 | -0.19 |
| 6236.00 | RRAD | 8.00 | NA | NA | NA | NA | -0.45 | -0.60 | -0.45 | -0.34 | -0.01 | -0.01 |
| 80221.00 | ACSF2 | 8.00 | NA | NA | NA | NA | -0.23 | -0.39 | -0.33 | -0.27 | -0.06 | -0.12 |
| 10653.00 | SPINT2 | 8.00 | NA | NA | NA | NA | -0.17 | -0.41 | -0.41 | -0.28 | -0.02 | -0.10 |
| 283987.00 | HID1 | 8.00 | NA | NA | NA | NA | -0.45 | -0.36 | -0.25 | -0.32 | -0.16 | -0.09 |
| 27065.00 | NSG1 | 8.00 | NA | NA | NA | NA | -0.39 | -0.51 | -0.30 | -0.28 | 0.09 | -0.05 |
| 3635.00 | INPP5D | 8.00 | NA | NA | NA | NA | -0.49 | -0.39 | -0.38 | -0.34 | 0.01 | -0.05 |
| 155382.00 | VPS37D | 8.00 | NA | NA | NA | NA | -0.22 | -0.47 | -0.30 | -0.28 | -0.03 | 0.04 |
| 389812.00 | LCN15 | 8.00 | NA | NA | NA | NA | -0.11 | -0.27 | -0.38 | -0.24 | -0.23 | -0.05 |
| 53820.00 | RIPPLY3 | 8.00 | NA | NA | NA | NA | -0.45 | -0.25 | -0.33 | -0.39 | -0.04 | -0.14 |
| 340061.00 | TMEM173 | 8.00 | NA | NA | NA | NA | -0.55 | -0.40 | -0.26 | -0.34 | -0.15 | -0.17 |
| 283991.00 | UBALD2 | 8.00 | NA | NA | NA | NA | -0.58 | -0.36 | -0.19 | -0.30 | 0.01 | -0.03 |
| 25840.00 | METTL7A | 8.00 | NA | NA | NA | NA | -0.23 | -0.41 | -0.28 | -0.46 | 0.01 | -0.07 |
| 55959.00 | SULF2 | 8.00 | NA | NA | NA | NA | -0.40 | -0.49 | -0.47 | -0.54 | -0.21 | -0.13 |
| 79690.00 | GAL3ST4 | 8.00 | NA | NA | NA | NA | -0.44 | -0.34 | -0.19 | -0.31 | 0.02 | -0.06 |
| 6693;105369261 | SPN;LOC105369261 | 8.00 | NA | NA | NA | NA | -0.71 | -0.45 | -0.18 | -0.25 | -0.14 | -0.25 |
| 5268.00 | SERPINB5 | 8.00 | NA | NA | NA | NA | -0.22 | -0.35 | -0.40 | -0.33 | 0.13 | -0.02 |
| NA | NA | 8.00 | NA | NA | NA | NA | -0.10 | -0.26 | -0.41 | -0.20 | -0.07 | -0.16 |
| 2878.00 | GPX3 | 8.00 | NA | NA | NA | NA | -0.51 | -0.32 | -0.17 | -0.36 | 0.08 | -0.12 |
| 54492.00 | NEURL1B | 8.00 | NA | NA | NA | NA | -0.35 | -0.39 | -0.33 | -0.28 | -0.08 | -0.09 |
| NA | NA | 8.00 | NA | NA | NA | NA | -0.13 | -0.42 | -0.30 | -0.22 | 0.05 | -0.04 |
| 643401.00 | LINC01021 | 8.00 | NA | NA | NA | NA | -0.60 | -0.58 | -0.50 | -0.35 | -0.01 | -0.05 |
| NA | NA | 8.00 | NA | NA | NA | NA | -0.35 | -0.40 | -0.53 | -0.43 | -0.16 | -0.01 |
| 100463486.00 | MTRNR2L8 | 8.00 | NA | NA | NA | NA | -0.69 | -0.29 | -0.28 | -1.66 | 0.80 | -0.59 |
| 102724362.00 | LOC102724362 | 8.00 | NA | NA | NA | NA | -0.20 | -0.11 | -0.42 | -0.12 | -0.09 | -0.19 |
| NA | NA | 8.00 | NA | NA | NA | NA | -0.25 | -0.25 | -0.48 | -0.19 | -0.15 | -0.16 |
| 284454.00 | LOC284454 | 8.00 | NA | NA | NA | NA | -0.43 | -0.32 | -0.36 | -0.17 | -0.17 | -0.12 |
| 100462981.00 | MTRNR2L2 | 8.00 | NA | NA | NA | NA | -0.11 | -0.14 | -0.27 | -0.74 | 0.16 | -0.24 |
| 256302.00 | NATD1 | 8.00 | NA | NA | NA | NA | -0.70 | -0.43 | -0.23 | -0.48 | -0.14 | -0.14 |
| NA | NA | 8.00 | NA | NA | NA | NA | -0.49 | -0.26 | -0.24 | -0.36 | -0.22 | -0.27 |
| 6387.00 | CXCL12 | 9.00 | Power | 1.66 | 0.25 | 78.43 | 0.52 | 0.63 | 0.58 | 0.52 | 0.14 | 0.22 |
| 8354.00 | HIST1H3I | 9.00 | Poly 2 | 1.07 | 0.78 | 240.89 | 0.55 | 0.67 | 0.72 | 0.43 | 0.03 | 0.31 |
| 55117.00 | SLC6A15 | 9.00 | NA | NA | NA | NA | 0.62 | 0.52 | 0.45 | 0.40 | 0.21 | 0.21 |
| 5737.00 | PTGFR | 9.00 | NA | NA | NA | NA | 0.51 | 0.33 | 0.34 | 0.35 | 0.25 | 0.29 |
| 3007.00 | HIST1H1D | 9.00 | NA | NA | NA | NA | 0.71 | 0.41 | 0.30 | 0.34 | 0.04 | 0.28 |
| 3024.00 | HIST1H1A | 9.00 | NA | NA | NA | NA | 0.50 | 0.52 | 0.49 | 0.39 | 0.02 | 0.27 |
| 8970.00 | HIST1H2BJ | 9.00 | NA | NA | NA | NA | 0.72 | 0.54 | 0.45 | 0.52 | 0.10 | 0.31 |
| 5570.00 | PKIB | 9.00 | NA | NA | NA | NA | 0.69 | 0.42 | 0.39 | 0.37 | -0.04 | 0.07 |
| 3017.00 | HIST1H2BD | 9.00 | NA | NA | NA | NA | 0.66 | 0.51 | 0.42 | 0.46 | 0.06 | 0.27 |
| 8365.00 | HIST1H4H | 9.00 | NA | NA | NA | NA | 0.44 | 0.57 | 0.52 | 0.53 | 0.01 | 0.31 |
| 3008.00 | HIST1H1E | 9.00 | NA | NA | NA | NA | 0.76 | 0.57 | 0.48 | 0.47 | 0.12 | 0.36 |
| 8347.00 | HIST1H2BC | 9.00 | NA | NA | NA | NA | 0.68 | 0.55 | 0.39 | 0.40 | 0.11 | 0.33 |
| 653604.00 | HIST2H3D | 9.00 | NA | NA | NA | NA | 0.84 | 0.54 | 0.42 | 0.56 | 0.20 | 0.26 |
| 8338.00 | HIST2H2AC | 9.00 | NA | NA | NA | NA | 0.98 | 0.71 | 0.60 | 0.59 | 0.22 | 0.37 |
| 317772.00 | HIST2H2AB | 9.00 | NA | NA | NA | NA | 0.88 | 0.66 | 0.54 | 0.55 | 0.17 | 0.33 |
| 3009.00 | HIST1H1B | 9.00 | NA | NA | NA | NA | 0.91 | 0.68 | 0.57 | 0.61 | 0.20 | 0.36 |
| 8349.00 | HIST2H2BE | 9.00 | NA | NA | NA | NA | 0.61 | 0.42 | 0.30 | 0.29 | 0.07 | 0.20 |
| 8340.00 | HIST1H2BL | 9.00 | NA | NA | NA | NA | 0.83 | 0.64 | 0.59 | 0.49 | 0.06 | 0.37 |
| 3006.00 | HIST1H1C | 9.00 | NA | NA | NA | NA | 0.79 | 0.59 | 0.49 | 0.50 | 0.19 | 0.35 |
| 8329.00 | HIST1H2AI | 9.00 | NA | NA | NA | NA | 0.99 | 0.74 | 0.65 | 0.62 | 0.20 | 0.45 |
| 8969.00 | HIST1H2AG | 9.00 | NA | NA | NA | NA | 0.81 | 0.57 | 0.49 | 0.53 | 0.16 | 0.34 |
| 128312.00 | HIST3H2BB | 9.00 | NA | NA | NA | NA | 0.60 | 0.40 | 0.32 | 0.34 | 0.07 | 0.26 |
| 8364.00 | HIST1H4C | 9.00 | NA | NA | NA | NA | 0.67 | 0.55 | 0.38 | 0.48 | 0.07 | 0.36 |
| 8356.00 | HIST1H3J | 9.00 | NA | NA | NA | NA | 0.83 | 0.61 | 0.53 | 0.54 | 0.10 | 0.31 |
| 85236.00 | HIST1H2BK | 9.00 | NA | NA | NA | NA | 0.64 | 0.56 | 0.49 | 0.44 | 0.09 | 0.30 |
| 440689.00 | HIST2H2BF | 9.00 | NA | NA | NA | NA | 0.82 | 0.79 | 0.63 | 0.60 | 0.06 | 0.41 |
| 8339.00 | HIST1H2BG | 9.00 | NA | NA | NA | NA | 0.87 | 0.64 | 0.54 | 0.62 | 0.18 | 0.34 |
| 8358.00 | HIST1H3B | 9.00 | NA | NA | NA | NA | 0.75 | 0.61 | 0.51 | 0.48 | 0.05 | 0.33 |
| 8348.00 | HIST1H2BO | 9.00 | NA | NA | NA | NA | 0.70 | 0.60 | 0.49 | 0.48 | 0.10 | 0.32 |
| 85235.00 | HIST1H2AH | 9.00 | NA | NA | NA | NA | 0.96 | 0.68 | 0.59 | 0.64 | 0.20 | 0.39 |
| 8368.00 | HIST1H4L | 9.00 | NA | NA | NA | NA | 0.66 | 0.57 | 0.44 | 0.58 | 0.12 | 0.37 |
| 8330.00 | HIST1H2AK | 9.00 | NA | NA | NA | NA | 0.72 | 0.44 | 0.41 | 0.46 | 0.04 | 0.21 |
| 8350.00 | HIST1H3A | 9.00 | NA | NA | NA | NA | 0.62 | 0.41 | 0.31 | 0.45 | 0.17 | 0.29 |
| 8331.00 | HIST1H2AJ | 9.00 | NA | NA | NA | NA | 0.76 | 0.56 | 0.47 | 0.50 | 0.16 | 0.41 |
| 8332.00 | HIST1H2AL | 9.00 | NA | NA | NA | NA | 0.70 | 0.61 | 0.53 | 0.46 | 0.11 | 0.39 |
| 3012.00 | HIST1H2AE | 9.00 | NA | NA | NA | NA | 0.79 | 0.67 | 0.58 | 0.58 | 0.10 | 0.34 |
| 8360.00 | HIST1H4D | 9.00 | NA | NA | NA | NA | 0.74 | 0.52 | 0.30 | 0.46 | 0.02 | 0.22 |
| 8343.00 | HIST1H2BF | 9.00 | NA | NA | NA | NA | 0.84 | 0.69 | 0.62 | 0.52 | 0.15 | 0.37 |
| 8968.00 | HIST1H3F | 9.00 | NA | NA | NA | NA | 0.65 | 0.38 | 0.27 | 0.35 | 0.03 | 0.29 |
| 8335.00 | HIST1H2AB | 9.00 | NA | NA | NA | NA | 0.93 | 0.64 | 0.61 | 0.65 | 0.23 | 0.38 |
| 8366.00 | HIST1H4B | 9.00 | NA | NA | NA | NA | 0.66 | 0.54 | 0.48 | 0.53 | 0.02 | 0.33 |
| 8357.00 | HIST1H3H | 9.00 | NA | NA | NA | NA | 0.82 | 0.55 | 0.46 | 0.56 | 0.13 | 0.38 |
| NA | NA | 9.00 | NA | NA | NA | NA | 0.37 | 0.29 | 0.32 | 0.62 | 0.08 | 0.48 |
| 3437.00 | IFIT3 | 10.00 | Linear | 0.68 | 0.07 | 120.84 | -0.06 | -0.17 | -0.17 | -0.06 | 0.42 | 0.24 |
| 3433.00 | IFIT2 | 10.00 | Linear | 0.67 | 0.82 | 129.45 | -0.04 | -0.13 | -0.14 | 0.01 | 0.63 | 0.52 |
| 55601.00 | DDX60 | 10.00 | Linear | 0.75 | 0.20 | 171.57 | 0.08 | -0.10 | -0.01 | 0.10 | 0.60 | 0.43 |
| 5329.00 | PLAUR | 10.00 | NA | NA | NA | NA | 0.13 | 0.03 | 0.05 | 0.16 | 0.39 | 0.21 |
| 960.00 | CD44 | 10.00 | NA | NA | NA | NA | -0.04 | 0.24 | 0.37 | 0.26 | 0.39 | 0.19 |
| 9734.00 | HDAC9 | 10.00 | NA | NA | NA | NA | -0.09 | -0.09 | 0.00 | 0.05 | 0.40 | 0.08 |
| 4254.00 | KITLG | 10.00 | NA | NA | NA | NA | 0.15 | 0.16 | 0.18 | 0.31 | 0.46 | 0.13 |
| 3918.00 | LAMC2 | 10.00 | NA | NA | NA | NA | 0.07 | 0.12 | 0.16 | 0.26 | 0.52 | 0.31 |
| 89795.00 | NAV3 | 10.00 | NA | NA | NA | NA | -0.10 | 0.06 | 0.08 | 0.05 | 0.38 | 0.04 |
| 10060.00 | ABCC9 | 10.00 | NA | NA | NA | NA | 0.01 | 0.07 | 0.05 | 0.22 | 0.44 | 0.16 |
| 10725.00 | NFAT5 | 10.00 | NA | NA | NA | NA | -0.29 | 0.08 | 0.23 | 0.05 | 0.39 | 0.06 |
| 22943.00 | DKK1 | 10.00 | NA | NA | NA | NA | 0.14 | 0.08 | 0.13 | 0.25 | 0.45 | 0.06 |
| 2004.00 | ELK3 | 10.00 | NA | NA | NA | NA | -0.13 | 0.14 | 0.19 | 0.00 | 0.40 | 0.05 |
| 397.00 | ARHGDIB | 10.00 | NA | NA | NA | NA | 0.15 | 0.21 | 0.22 | 0.13 | 0.39 | 0.22 |
| 860.00 | RUNX2 | 10.00 | NA | NA | NA | NA | -0.06 | 0.26 | 0.40 | 0.09 | 0.33 | 0.01 |
| 5420.00 | PODXL | 10.00 | NA | NA | NA | NA | -0.31 | 0.03 | 0.25 | 0.01 | 0.57 | 0.23 |
| 8638.00 | OASL | 10.00 | NA | NA | NA | NA | 0.23 | -0.02 | -0.02 | 0.20 | 0.61 | 0.44 |
| 4907.00 | NT5E | 10.00 | NA | NA | NA | NA | 0.28 | 0.22 | 0.24 | 0.33 | 0.55 | 0.31 |
| 10561.00 | IFI44 | 10.00 | NA | NA | NA | NA | 0.15 | 0.04 | -0.09 | 0.09 | 0.50 | 0.33 |
| 316.00 | AOX1 | 10.00 | NA | NA | NA | NA | 0.36 | 0.19 | 0.29 | 0.41 | 0.61 | 0.38 |
| 51191.00 | HERC5 | 10.00 | NA | NA | NA | NA | -0.07 | -0.10 | -0.19 | -0.02 | 0.49 | 0.35 |
| 2250.00 | FGF5 | 10.00 | NA | NA | NA | NA | -0.05 | 0.21 | 0.37 | 0.35 | 0.47 | 0.05 |
| 22822.00 | PHLDA1 | 10.00 | NA | NA | NA | NA | -0.23 | 0.02 | 0.21 | 0.02 | 0.43 | 0.11 |
| 255928.00 | SYT14 | 10.00 | NA | NA | NA | NA | -0.02 | 0.09 | 0.12 | 0.20 | 0.40 | 0.15 |
| 11221.00 | DUSP10 | 10.00 | NA | NA | NA | NA | 0.19 | 0.22 | 0.12 | 0.18 | 0.43 | 0.25 |
| 57574.00 | 43163.00 | 10.00 | NA | NA | NA | NA | -0.16 | 0.16 | 0.24 | 0.10 | 0.41 | 0.12 |
| 6695.00 | SPOCK1 | 10.00 | NA | NA | NA | NA | 0.01 | 0.33 | 0.44 | 0.18 | 0.65 | 0.37 |
| 5801.00 | PTPRR | 10.00 | NA | NA | NA | NA | 0.21 | 0.06 | 0.04 | 0.25 | 0.44 | 0.00 |
| 2919.00 | CXCL1 | 10.00 | NA | NA | NA | NA | 0.03 | 0.01 | 0.11 | 0.12 | 0.38 | -0.05 |
| 4982.00 | TNFRSF11B | 10.00 | NA | NA | NA | NA | 0.20 | 0.07 | 0.05 | 0.29 | 0.44 | -0.09 |
| 8710.00 | SERPINB7 | 10.00 | NA | NA | NA | NA | 0.34 | 0.12 | 0.21 | 0.28 | 0.49 | 0.28 |
| 26585.00 | GREM1 | 10.00 | NA | NA | NA | NA | -0.27 | -0.10 | -0.02 | 0.13 | 0.40 | -0.11 |
| 3575.00 | IL7R | 10.00 | NA | NA | NA | NA | 0.12 | 0.10 | 0.12 | 0.30 | 0.41 | -0.02 |
| 92126.00 | DSEL | 10.00 | NA | NA | NA | NA | 0.27 | 0.30 | 0.31 | 0.27 | 0.48 | 0.20 |
| 65059.00 | RAPH1 | 10.00 | NA | NA | NA | NA | 0.08 | 0.18 | 0.14 | 0.24 | 0.51 | 0.05 |
| 64864.00 | RFX7 | 10.00 | NA | NA | NA | NA | -0.13 | 0.11 | 0.20 | -0.01 | 0.41 | 0.06 |
| 50863.00 | NTM | 10.00 | NA | NA | NA | NA | 0.24 | 0.32 | 0.40 | 0.43 | 0.61 | 0.50 |
| 339512.00 | CCDC190 | 10.00 | NA | NA | NA | NA | -0.03 | -0.06 | -0.06 | 0.13 | 0.44 | -0.12 |
| 92737.00 | DNER | 10.00 | NA | NA | NA | NA | 0.17 | 0.14 | 0.24 | 0.32 | 0.52 | 0.35 |
| 388115.00 | C15orf52 | 10.00 | NA | NA | NA | NA | -0.14 | 0.20 | 0.18 | 0.43 | 0.35 | 0.07 |
| 57522.00 | SRGAP1 | 10.00 | NA | NA | NA | NA | -0.19 | 0.22 | 0.46 | 0.13 | 0.41 | 0.12 |
| 100131897.00 | FAM196B | 10.00 | NA | NA | NA | NA | 0.25 | 0.19 | 0.26 | 0.23 | 0.55 | 0.26 |
| 100216001.00 | LINC00704 | 10.00 | NA | NA | NA | NA | 0.11 | 0.02 | 0.04 | 0.11 | 0.43 | 0.11 |
| NA | NA | 10.00 | NA | NA | NA | NA | -0.20 | -0.28 | -0.26 | 0.01 | 0.50 | -0.01 |
| NA | NA | 10.00 | NA | NA | NA | NA | -0.09 | 0.23 | 0.38 | 0.10 | 0.28 | 0.15 |
| NA | NA | 10.00 | NA | NA | NA | NA | 0.21 | 0.15 | 0.13 | 0.18 | 0.53 | 0.17 |
| 101926940.00 | LOC101926940 | 10.00 | NA | NA | NA | NA | 0.15 | 0.11 | -0.02 | 0.14 | 0.40 | 0.06 |
